# Supplementary material for: 6S RNA facilitates bacterial virulence and adaptation at the epithelial barrier
Source: Research Square preprint supplement (doi:10.21203/rs.3.rs-7847320/v1), 2025-11-19
Supplement: Supplementary file 1 [file 0d97ee7dabffd92916a7730e.xlsx]

## Sheet: Supp Table 2
Supplementary Table 2. Differentially expressed genes during Yersinia pseudotuberculosis localization in tissue versus in lumen. Differentially expressed genes identified with edgeR and DEseq2 were combined in the list. Log2 fold change >(abs)0,6, and p-value <0,05 was used as cutoff.
Locus tag /gene name	locus_tag	Chromosome	Region	Product	edgeR_logFC	edgeR_PValue	edgeR_FDR	DESeq2_log2FoldChange	DESeq2_pvalue	DESeq2_padj
YPK_0011	YPK_0011	NC_010465	11970..12383	heat shock protein IbpA	3.17557	5.77e-05	0.00420859	2.33223	4.39e-05	0.00433239
YPK_0015	YPK_0015	NC_010465	complement(16993..17436)	hypothetical protein	-2.20919	0.00204922	0.0693129	-1.83084	0.000332063	0.0188593
YPK_0037	YPK_0037	NC_010466	40210..40797	molybdopterin oxidoreductase Fe4S4 region	1.64093	0.0275887	0.328901	1.26036	0.0219245	0.303968
YPK_0045	YPK_0045	NC_010467	complement(50488..51036)	hypothetical protein	-1.14862	0.0224308	0.297809	-1.06234	0.00474543	0.115291
YPK_0061	YPK_0061	NC_010468	69706..70896	integrase family protein	1.61743	0.00346709	0.0945732	1.38956	0.00173734	0.0590411
YPK_0067	YPK_0067	NC_010469	75893..76648	Integrase catalytic subunit	3.89061	0.00124807	0.0488595	1.99511	0.00225025	0.0701469
YPK_0108	YPK_0108	NC_010470	130167..131036	hypothetical protein	-2.36438	8.65e-05	0.00599851	-2.06778	4.67e-06	0.000744089
YPK_0128	YPK_0128	NC_010471	156082..156765	hypothetical protein	NA	NA	NA	1.08873	0.0315729	0.3677
YPK_0151	YPK_0151	NC_010472	196560..199007	glycogen/starch/alpha-glucan phosphorylase	1.08057	0.0234088	0.301745	0.968241	0.0106508	0.191161
YPK_0168	YPK_0168	NC_010473	complement(216542..218857)	ferrous iron transport protein B	NA	NA	NA	-0.851296	0.00987236	0.186049
YPK_0174	YPK_0174	NC_010474	complement(225667..227286)	phosphoenolpyruvate carboxykinase	1.04811	0.0280837	0.328901	0.940352	0.014023	0.230561
YPK_0181	YPK_0181	NC_010475	complement(233187..233942)	D12 class N6 adenine-specific DNAmethyltransferase	-2.10791	0.024788	0.312846	-1.34426	0.034728	0.378474
YPK_0183	YPK_0183	NC_010476	complement(234521..235747)	tail fiber repeat 2-containing protein	2.78421	0.0128332	0.217906	1.43582	0.0288719	0.357321
YPK_0199	YPK_0199	NC_010477	complement(245621..246259)	putative endolysin	3.30789	0.0161475	0.238621	1.42649	0.0306384	0.363757
YPK_0201	YPK_0201	NC_010478	complement(246632..247069)	hypothetical protein	6.1538	0.00573173	0.125564	1.29145	0.0400625	0.40331
YPK_0205	YPK_0205	NC_010479	complement(248303..248512)	hypothetical protein	5.14743	0.0280588	0.328901	NA	NA	NA
YPK_0209	YPK_0209	NC_010480	complement(249501..250001)	hypothetical protein	5.45361	0.0187573	0.266078	NA	NA	NA
YPK_0212	YPK_0212	NC_010481	complement(250975..251613)	hypothetical protein	6.28898	0.00459601	0.111501	1.29788	0.0388875	0.398093
YPK_0252	YPK_0252	NC_010482	293418..294290	hypothetical protein	-1.23217	0.0287254	0.328901	-1.10316	0.00951425	0.181757
YPK_0267	YPK_0267	NC_010483	308325..308546	hypothetical protein	2.94152	0.00695082	0.144059	1.74615	0.00640044	0.140403
YPK_0268	YPK_0268	NC_010484	308641..309222	FKBP-type peptidyl-prolyl cis-trans isomerase	2.33771	0.0188002	0.266078	1.37705	0.0333814	0.375066
YPK_0270	YPK_0270	NC_010485	309956..310756	FKBP-type peptidyl-prolyl cis-trans isomerase	1.30786	0.0145663	0.229171	1.04423	0.0451097	0.423992
YPK_0275	YPK_0275	NC_010486	312937..313311	30S ribosomal protein S12	3.22099	0.00240869	0.076994	1.82039	0.00504476	0.120204
YPK_0278	YPK_0278	NC_010487	316152..317336	elongation factor Tu	1.24777	0.0134099	0.222342	1.02527	0.0396962	0.40331
YPK_0279	YPK_0279	NC_010488	317539..317997	transposase IS200-family protein	-7.53733	3.99e-05	0.00318368	-2.61953	7.33e-05	0.00646746
YPK_0280	YPK_0280	NC_010489	318185..318379	bacterioferritin-associated ferredoxin	2.71396	0.000789302	0.0353433	1.90441	0.00135365	0.0492302
YPK_0282	YPK_0282	NC_010490	319345..319656	30S ribosomal protein S10	2.73348	0.00414728	0.105631	1.5558	0.0162253	0.254459
YPK_0283	YPK_0283	NC_010491	319689..320318	50S ribosomal protein L3	1.25877	0.0148807	0.229199	1.12224	0.00439152	0.10967
YPK_0284	YPK_0284	NC_010492	320335..320940	50S ribosomal protein L4	0.990194	0.0403728	0.392676	0.867762	0.0385915	0.397023
YPK_0285	YPK_0285	NC_010493	320937..321239	50S ribosomal protein L23	1.20523	0.0159522	0.238324	1.03686	0.0203766	0.290315
YPK_0287	YPK_0287	NC_010494	322095..322373	30S ribosomal protein S19	1.72944	0.0143136	0.229171	1.24787	0.0345738	0.378474
YPK_0289	YPK_0289	NC_010495	322738..323436	30S ribosomal protein S3	1.70537	0.000805336	0.0353433	1.5248	0.000120835	0.00982318
YPK_0290	YPK_0290	NC_010496	323449..323859	50S ribosomal protein L16	3.10921	3.08e-08	6.51e-06	2.56932	1.42e-07	3.46e-05
YPK_0296	YPK_0296	NC_010497	325749..326054	30S ribosomal protein S14	2.08915	0.00555576	0.122983	1.49339	0.0108391	0.19287
YPK_0297	YPK_0297	NC_010498	326088..326480	30S ribosomal protein S8	1.92148	0.00034143	0.0187476	1.63837	0.000370859	0.0201169
YPK_0298	YPK_0298	NC_010499	326495..327028	50S ribosomal protein L6	1.58453	0.00177476	0.0620138	1.399	0.000749441	0.0337737
YPK_0302	YPK_0302	NC_010500	328095..328529	50S ribosomal protein L15	1.92217	0.00371571	0.0971946	1.59431	0.00111439	0.0442071
YPK_0303	YPK_0303	NC_010501	328537..329868	preprotein translocase subunit SecY	1.1717	0.0149077	0.229199	1.04274	0.00837312	0.167705
YPK_0305	YPK_0305	NC_010502	330166..330522	30S ribosomal protein S13	1.70106	0.000668578	0.0310632	1.45567	0.00144078	0.0509713
YPK_0306	YPK_0306	NC_010503	330539..330928	30S ribosomal protein S11	1.7872	0.000810856	0.0353433	1.51653	0.00112775	0.0442071
YPK_0307	YPK_0307	NC_010504	330959..331579	30S ribosomal protein S4	1.54317	0.00210983	0.0704791	1.32895	0.00305854	0.0856805
YPK_0308	YPK_0308	NC_010505	331605..332594	DNA-directed RNA polymerase subunit alpha	1.52493	0.00177108	0.0620138	1.35303	0.000863426	0.0365282
YPK_0310	YPK_0310	NC_010506	333471..333896	zinc-responsive transcriptional regulator	-2.17865	0.000834726	0.0359269	-1.85635	0.000103245	0.00856105
YPK_0313	YPK_0313	NC_010507	complement(334846..336222)	potassium transporter peripheral membraneprotein	-0.962053	0.0450942	0.41019	-0.895965	0.0172032	0.265146
YPK_0314	YPK_0314	NC_010508	complement(336278..337567)	16S rRNA methyltransferase B	-1.41287	0.00468923	0.111501	-1.29535	0.00102308	0.0416291
YPK_0316	YPK_0316	NC_010509	complement(338633..339145)	peptide deformylase	1.47163	0.0368173	0.377825	1.11278	0.0473486	0.428328
YPK_0327	YPK_0327	NC_010510	350676..351635	biotin--protein ligase	-0.977853	0.0419246	0.399055	-0.923131	0.00729314	0.155863
YPK_0335	YPK_0335	NC_010511	356927..357355	50S ribosomal protein L11	2.31809	0.000225218	0.0142122	1.9595	2.92e-05	0.00302695
YPK_0354	YPK_0354	NC_010512	379454..379729	transcriptional regulator HU subunit alpha	1.74775	0.002422	0.076994	1.43873	0.00379847	0.0996738
YPK_0358	YPK_0358	NC_010513	383945..384064	hypothetical protein	5.27028	0.0236459	0.302954	NA	NA	NA
YPK_0377	YPK_0377	NC_010514	complement(410285..411862)	maltose transporter membrane protein	NA	NA	NA	-0.847878	0.0299652	0.361955
YPK_0385	YPK_0385	NC_010515	complement(418592..419110)	Hcp1 family type VI secretion system effector	-1.5659	0.0154128	0.233568	-1.36875	0.00285719	0.0843288
YPK_0406	YPK_0406	NC_010516	447390..447878	putative cytoplasmic protein	-1.53167	0.0287581	0.328901	-1.29634	0.00862481	0.170278
YPK_0413	YPK_0413	NC_010517	complement(453206..454105)	xylose isomerase domain-containing protein	NA	NA	NA	-0.850356	0.0443543	0.421773
YPK_0428	YPK_0428	NC_010518	468170..469819	Na+/H+ antiporter	-1.08353	0.0332737	0.354361	NA	NA	NA
YPK_0441	YPK_0441	NC_010519	484021..484173	hypothetical protein	-5.94649	0.00245105	0.0773361	-1.4045	0.0242288	0.323158
YPK_0452	YPK_0452	NC_010520	complement(492765..493061)	DNA-binding protein Fis	5.7461	0.0118322	0.206721	NA	NA	NA
YPK_0455	YPK_0455	NC_010521	complement(495597..497051)	sodium/panthothenate symporter	NA	NA	NA	-0.824753	0.0476265	0.428328
YPK_0474	YPK_0474	NC_010522	complement(521283..521456)	hypothetical protein	-3.04146	0.0284614	0.328901	-1.36593	0.0382309	0.396263
YPK_0476	YPK_0476	NC_010523	complement(521799..522200)	putative phage-like protein	-1.50039	0.0349364	0.368357	-1.24113	0.0162751	0.254459
YPK_0480	YPK_0480	NC_010524	complement(530809..533310)	virulence protein	NA	NA	NA	-0.742923	0.0261277	0.337463
YPK_0494	YPK_0494	NC_010525	complement(546202..547863)	trehalose-6-phosphate hydrolase	1.30601	0.0125719	0.214331	1.13315	0.00774412	0.162191
YPK_0504	YPK_0504	NC_010526	complement(556049..556336)	putative sigma(54) modulation protein	2.36901	0.0223381	0.297809	1.40153	0.0298793	0.361955
YPK_0526	YPK_0526	NC_010527	574577..575218	stringent starvation protein A	2.08858	0.00228381	0.0742766	1.6895	0.000975274	0.0404349
YPK_0538	YPK_0538	NC_010528	complement(590499..590852)	hypothetical protein	3.96422	0.0119862	0.207696	1.44368	0.027457	0.3448
YPK_0547	YPK_0547	NC_010529	complement(598924..599229)	hypothetical protein	1.298	0.0156405	0.235331	1.13457	0.00777178	0.162191
YPK_0549	YPK_0549	NC_010530	complement(599990..600379)	hypothetical protein	-6.6835	0.000551758	0.027126	-1.90862	0.0033811	0.092224
YPK_0553	YPK_0553	NC_010531	complement(603190..604494)	d-galactonate transporter	NA	NA	NA	-0.789233	0.0486114	0.433426
YPK_0565	YPK_0565	NC_010532	complement(622245..623744)	putative kinase protein	NA	NA	NA	-0.762004	0.0438289	0.420636
YPK_0574	YPK_0574	NC_010533	633374..633679	hypothetical protein	5.43246	0.0188168	0.266078	NA	NA	NA
YPK_0578	YPK_0578	NC_010534	639472..639705	hypothetical protein	7.7342	1.7e-05	0.00163762	2.44216	0.000215424	0.0137009
YPK_0582	YPK_0582	NC_010535	640743..641540	putative adhesin/hemolysin	-1.54454	0.0261496	0.322892	-1.27882	0.0124787	0.213269
YPK_0588	YPK_0588	NC_010536	651806..652792	LacI family transcriptional regulator	NA	NA	NA	-0.85846	0.0352445	0.380531
YPK_0600	YPK_0600	NC_010537	665674..667125	Na+/H+ antiporter NhaC	NA	NA	NA	-0.864699	0.033821	0.377663
YPK_0611	YPK_0611	NC_010538	674534..675064	hypothetical protein	-2.19016	0.00499716	0.114522	-1.73674	0.00139973	0.0504634
YPK_0615	YPK_0615	NC_010539	678089..678817	hypothetical protein	1.79859	0.0499951	0.438193	NA	NA	NA
YPK_0620	YPK_0620	NC_010540	681044..681418	hypothetical protein	NA	NA	NA	-1.31133	0.0471344	0.428328
YPK_0629	YPK_0629	NC_010541	687458..687979	hypothetical protein	6.01554	0.00776389	0.155572	NA	NA	NA
YPK_0631	YPK_0631	NC_010542	689126..689434	hypothetical protein	2.70192	0.000125789	0.00818209	2.06553	0.000196093	0.0131165
YPK_0634	YPK_0634	NC_010543	complement(691156..692994)	RNA polymerase sigma factor RpoD	1.14484	0.0197059	0.272277	0.995852	0.0211031	0.297715
YPK_0636	YPK_0636	NC_010544	complement(695036..695251)	30S ribosomal protein S21	5.14743	0.0280588	0.328901	NA	NA	NA
YPK_0638	YPK_0638	NC_010545	complement(696861..697511)	putative glycerol-3-phosphate acyltransferasePlsY	1.64577	0.0437325	0.408081	1.22358	0.0317236	0.368349
YPK_0647	YPK_0647	NC_010546	complement(709139..709420)	hypothetical protein	4.71427	6.5e-06	0.000723105	2.8331	5.38e-06	0.000796147
YPK_0672	YPK_0672	NC_010547	736462..737499	tonB-system energizer ExbB	1.08977	0.0420821	0.399055	0.935655	0.0333188	0.375066
YPK_0679	YPK_0679	NC_010548	complement(740637..741407)	putative lipoprotein	-1.3849	0.0305399	0.3411	NA	NA	NA
YPK_0681	YPK_0681	NC_010549	complement(742221..743096)	type II secretion system protein	NA	NA	NA	-0.906075	0.0364891	0.385863
YPK_0701	YPK_0701	NC_010550	764093..764224	hypothetical protein	-6.18091	0.00155529	0.0571805	-1.53236	0.0154411	0.248135
YPK_0709	YPK_0709	NC_010551	771158..772186	sigma-54 dependent trancsriptional regulator	NA	NA	NA	-0.858431	0.0474408	0.428328
YPK_0720	YPK_0720	NC_010552	780374..780799	flagellar basal body rod protein FlgC	-3.0003	0.00278466	0.084523	-2.08802	0.000586188	0.0273071
YPK_0732	YPK_0732	NC_010553	790308..790904	hypothetical protein	2.02306	0.0366828	0.377398	1.30953	0.036576	0.385863
YPK_0740	YPK_0740	NC_010554	800713..800931	putative integral membrane efflux protein	5.45648	0.0185106	0.264401	NA	NA	NA
YPK_0741	YPK_0741	NC_010555	complement(801066..802562)	ShET2 enterotoxin domain-containing protein	-1.32834	0.00653283	0.137083	-1.20515	0.00336699	0.092224
YPK_0773	YPK_0773	NC_010556	878275..878790	hypothetical protein	-1.82588	0.0358587	0.371595	-1.32468	0.0266795	0.341398
YPK_0778	YPK_0778	NC_010557	complement(881824..883203)	anion transporter	NA	NA	NA	-0.80558	0.0440826	0.421773
YPK_0791	YPK_0791	NC_010558	900476..901219	LuxR family transcriptional regulator	NA	NA	NA	-0.795317	0.0464323	0.427529
YPK_0848	YPK_0848	NC_010559	969023..969481	transposase IS200-family protein	2.806	0.0247678	0.312846	NA	NA	NA
YPK_0852	YPK_0852	NC_010560	974549..975712	phosphoglycerate kinase	1.32748	0.0114047	0.203456	1.11412	0.0188864	0.280656
YPK_0853	YPK_0853	NC_010561	975832..976911	fructose-bisphosphate aldolase	1.83995	0.000267816	0.0156567	1.60361	0.000218103	0.0137009
YPK_0859	YPK_0859	NC_010562	982274..983515	D-3-phosphoglycerate dehydrogenase	1.10372	0.0278587	0.328901	0.94369	0.0355369	0.380714
YPK_0903	YPK_0903	NC_010563	1024397..1025068	hypothetical protein	6.86433	0.00098534	0.0408433	1.73449	0.00789837	0.162191
YPK_0913	YPK_0913	NC_010564	1031744..1032379	phage-like protein	6.16633	0.00590725	0.128081	1.24771	0.0457296	0.425273
YPK_0915	YPK_0915	NC_010565	1034170..1034598	tail assembly chaperone gp38	5.63043	0.0142137	0.229171	NA	NA	NA
YPK_0917	YPK_0917	NC_010566	1035285..1035833	hypothetical protein	NA	NA	NA	-1.33411	0.0339065	0.377663
YPK_0919	YPK_0919	NC_010567	1037661..1037858	hypothetical protein	5.40822	0.0193549	0.270075	NA	NA	NA
YPK_0935	YPK_0935	NC_010568	complement(1054290..1054580)	hypothetical protein	6.03579	0.00728988	0.148181	1.23776	0.0475641	0.428328
YPK_0939	YPK_0939	NC_010569	complement(1056910..1057362)	head completion protein	5.23089	0.0250331	0.314066	NA	NA	NA
YPK_0940	YPK_0940	NC_010570	complement(1057482..1058225)	small terminase subunit	4.38813	0.00279878	0.084523	1.74666	0.00814632	0.166378
YPK_0943	YPK_0943	NC_010571	1060611..1062704	hypothetical protein	2.00944	0.00694749	0.144059	1.55555	0.00419039	0.107243
YPK_0947	YPK_0947	NC_010572	1064438..1064590	hypothetical protein	-5.87471	0.00282096	0.0845889	-1.30157	0.0339769	0.377663
YPK_0958	YPK_0958	NC_010573	1074448..1075227	hypothetical protein	-1.75225	0.00133055	0.0511415	-1.50906	0.00134229	0.0492302
YPK_0959	YPK_0959	NC_010574	1075483..1075749	PAAR repeat-containing protein	6.7627	0.00136007	0.0513426	1.69367	0.00936748	0.181757
YPK_0997	YPK_0997	NC_010575	complement(1119977..1123051)	lyase	NA	NA	NA	-0.755382	0.0268216	0.342146
YPK_1004	YPK_1004	NC_010576	1130266..1132188	general secretion pathway protein D	-1.15243	0.0148656	0.229199	-1.09161	0.00127635	0.048107
YPK_1006	YPK_1006	NC_010577	1133683..1134885	type II secretion system protein	-1.12181	0.0403002	0.392676	-0.965326	0.0458561	0.425323
YPK_1011	YPK_1011	NC_010578	1136869..1137825	general secretion pathway protein K	NA	NA	NA	-0.911272	0.0405176	0.404785
YPK_1061	YPK_1061	NC_010579	1198117..1198566	flavodoxin	NA	NA	NA	-1.00547	0.0257868	0.335147
YPK_1066	YPK_1066	NC_010580	1204135..1204860	30S ribosomal protein S2	1.52777	0.01737	0.253243	1.26208	0.0105625	0.191137
YPK_1067	YPK_1067	NC_010581	1204988..1205845	elongation factor Ts	1.08476	0.0450928	0.41019	NA	NA	NA
YPK_1074	YPK_1074	NC_010582	1212143..1214530	outer membrane protein assembly factor YaeT	1.16911	0.0153594	0.233568	1.05334	0.00530594	0.124958
YPK_1075	YPK_1075	NC_010583	1214688..1215185	periplasmic chaperone	2.73367	4.14e-07	6.73e-05	2.23547	8.78e-06	0.00117756
YPK_1118	YPK_1118	NC_010584	complement(1259296..1259700)	ribonucleotide reductase stimulatory protein	3.49178	0.0325913	0.350626	NA	NA	NA
YPK_1126	YPK_1126	NC_010585	1265797..1266765	binding-protein-dependent transport system innermembrane protein	-1.23978	0.0236349	0.302954	-1.10674	0.0100451	0.187599
YPK_1128	YPK_1128	NC_010586	1267568..1268374	ABC transporter-like protein	1.86423	0.0487184	0.434332	1.21986	0.049863	0.436697
YPK_1131	YPK_1131	NC_010587	1270231..1270533	urease subunit gamma	1.74728	0.00134466	0.0512181	1.42902	0.00479651	0.115291
YPK_1132	YPK_1132	NC_010588	1270544..1271020	urease subunit beta	1.8398	0.00465766	0.111501	1.36041	0.0183409	0.275513
YPK_1133	YPK_1133	NC_010589	1271110..1272828	urease subunit alpha	1.3908	0.00425838	0.107169	1.22711	0.00305647	0.0856805
YPK_1136	YPK_1136	NC_010590	1274654..1275316	urease accessory protein UreG	1.54301	0.0278005	0.328901	1.23608	0.0175816	0.269212
YPK_1153	YPK_1153	NC_010591	1290563..1290805	hypothetical protein	-1.98416	0.0402612	0.392676	-1.42252	0.0177023	0.269212
YPK_1161	YPK_1161	NC_010592	1300951..1301079	hypothetical protein	3.19339	0.00215506	0.0706327	1.97633	0.00170314	0.0583573
YPK_1173	YPK_1173	NC_010593	complement(1310736..1311422)	uracil-DNA glycosylase	NA	NA	NA	-1.00195	0.0435123	0.418566
YPK_1174	YPK_1174	NC_010594	1311774..1312157	autonomous glycyl radical cofactor GrcA	2.84351	6.67e-08	1.28e-05	2.45913	3.33e-08	1.2e-05
YPK_1176	YPK_1176	NC_010595	1313291..1313389	hypothetical protein	4.80982	0.0421896	0.399055	NA	NA	NA
YPK_1180	YPK_1180	NC_010596	1315728..1316486	methyltransferase small	-1.46585	0.0259088	0.322184	-1.27354	0.00622423	0.137998
YPK_1182	YPK_1182	NC_010597	1318594..1319169	RNA polymerase sigma factor RpoE	1.54461	0.0120418	0.207807	1.21756	0.0230112	0.312802
YPK_1194	YPK_1194	NC_010598	complement(1329491..1329676)	iron-sulfur cluster-binding protein	5.1757	0.0266039	0.324042	NA	NA	NA
YPK_1196	YPK_1196	NC_010599	complement(1331363..1331578)	hypothetical protein	5.7461	0.0118322	0.206721	NA	NA	NA
YPK_1202	YPK_1202	NC_010600	complement(1334572..1334841)	VRR-NUC domain-containing protein	5.78536	0.0111646	0.200867	NA	NA	NA
YPK_1206	YPK_1206	NC_010601	complement(1338075..1338452)	hypothetical protein	-3.16877	0.020695	0.280443	-1.37053	0.0371707	0.390152
YPK_1213	YPK_1213	NC_010602	1345022..1345234	hypothetical protein	5.54612	0.0161685	0.238621	NA	NA	NA
YPK_1232	YPK_1232	NC_010603	1358840..1359379	hypothetical protein	-3.0027	0.0474936	0.427241	NA	NA	NA
YPK_1234	YPK_1234	NC_010604	1360918..1361358	hypothetical protein	6.73038	0.00152564	0.0565826	1.66315	0.0105822	0.191137
YPK_1236	YPK_1236	NC_010605	1361899..1363470	hypothetical protein	1.84974	0.0369532	0.378301	1.28333	0.033303	0.375066
YPK_1239	YPK_1239	NC_010606	1364287..1365126	hypothetical protein	2.57734	0.00954787	0.180733	1.48576	0.0214474	0.300408
YPK_1244	YPK_1244	NC_010607	1369205..1369426	hypothetical protein	5.76062	0.0125421	0.214331	NA	NA	NA
YPK_1259	YPK_1259	NC_010608	1387322..1388659	two component, sigma54 specific, Fis familytranscriptional regulator	1.49423	0.0167509	0.245062	NA	NA	NA
YPK_1262	YPK_1262	NC_010609	1390456..1390794	nitrogen regulatory protein P-II 1	2.3138	0.0230499	0.29918	NA	NA	NA
YPK_1265	YPK_1265	NC_010610	1394116..1395369	serine hydroxymethyltransferase	1.68939	0.00100273	0.0411605	1.45341	0.00124993	0.0475433
YPK_1267	YPK_1267	NC_010611	1395703..1395828	hypothetical protein	3.16994	0.0262713	0.322892	NA	NA	NA
YPK_1268	YPK_1268	NC_010612	1395821..1396360	virulence-related outer membrane protein	3.46247	9.5e-10	4.46e-07	2.47613	2.72e-05	0.00288631
YPK_1271	YPK_1271	NC_010613	1399531..1400205	hypothetical protein	1.50805	0.0193526	0.270075	1.25458	0.00914398	0.179673
YPK_1277	YPK_1277	NC_010614	1404976..1405362	scaffold protein	3.41277	0.0110665	0.199955	1.50377	0.0227898	0.310811
YPK_1285	YPK_1285	NC_010615	1410834..1411751	enhanced serine sensitivity protein SseB	NA	NA	NA	-1.04985	0.0202061	0.289588
YPK_1296	YPK_1296	NC_010616	1425841..1427022	outer membrane protein assembly complex subunitYfgL	NA	NA	NA	0.883241	0.0417742	0.412217
YPK_1316	YPK_1316	NC_010617	1447960..1448121	insertion element protein	-4.1238	0.00771328	0.155294	-1.66162	0.0114381	0.199253
YPK_1323	YPK_1323	NC_010618	1452474..1452983	inhibitor of vertebrate lysozyme	2.03644	0.0167349	0.245062	1.29212	0.041839	0.412217
YPK_1346	YPK_1346	NC_010619	1486040..1487752	phosphate ABC transporter permease	NA	NA	NA	-0.873949	0.0498845	0.436697
YPK_1354	YPK_1354	NC_010620	1495395..1496102	DNA replication initiation factor	NA	NA	NA	-0.992131	0.0498533	0.436697
YPK_1368	YPK_1368	NC_010621	1507209..1509260	hypothetical protein	-1.22219	0.0226363	0.29815	-1.11016	0.00725588	0.155863
YPK_1374	YPK_1374	NC_010622	complement(1512173..1512646)	hypothetical protein	-2.12993	0.0177112	0.256449	-1.49456	0.0138699	0.230561
YPK_1379	YPK_1379	NC_010623	1519180..1520355	radical SAM domain-containing protein	-1.40145	0.00490907	0.114522	-1.29172	0.000831261	0.0358937
YPK_1383	YPK_1383	NC_010624	1526300..1526578	hypothetical protein	2.40427	0.0179409	0.258008	1.48743	0.0190454	0.281004
YPK_1386	YPK_1386	NC_010625	1528546..1528812	assembly protein for periplasmic nitratereductase	3.56494	0.0292298	0.331323	NA	NA	NA
YPK_1389	YPK_1389	NC_010626	1531879..1532478	cytochrome c-type protein NapC	1.64811	0.0284967	0.328901	1.20986	0.0350389	0.380291
YPK_1395	YPK_1395	NC_010627	1538445..1538861	hypothetical protein	-2.71169	0.00122336	0.04834	-2.08342	0.00021314	0.0137009
YPK_1400	YPK_1400	NC_010628	complement(1544299..1545192)	dihydrodipicolinate synthetase	1.96748	0.0287827	0.328901	1.33857	0.0280374	0.349078
YPK_1403	YPK_1403	NC_010629	complement(1546281..1547252)	hypothetical protein	-2.06258	0.000243639	0.0145086	-1.72823	0.000527305	0.0252597
YPK_1407	YPK_1407	NC_010630	1550617..1552149	putative sialic acid transporter	NA	NA	NA	-0.78155	0.0475	0.428328
YPK_1409	YPK_1409	NC_010631	1553519..1554352	sulfate/thiosulfate transporter subunit	-1.83635	0.00914014	0.175657	-1.53831	0.00199945	0.0643739
YPK_1417	YPK_1417	NC_010632	1563817..1564998	class I and II aminotransferase	-1.01489	0.0426339	0.401462	-0.931526	0.0207964	0.295281
YPK_1426	YPK_1426	NC_010633	complement(1575702..1576211)	PTS system glucose-specific transporter	4.12109	2.44e-11	2.16e-08	3.335	3.02e-11	3.13e-08
YPK_1427	YPK_1427	NC_010634	complement(1576260..1577987)	phosphoenolpyruvate-protein phosphotransferase	3.62352	3.37e-11	2.38e-08	3.10119	1.21e-11	1.95e-08
YPK_1428	YPK_1428	NC_010635	complement(1578036..1578293)	PTS system phosphohistidinoprotein-hexosephosphotransferase Hpr	3.09323	1.5e-08	3.53e-06	2.62039	2.37e-08	9.88e-06
YPK_1429	YPK_1429	NC_010636	complement(1578792..1579760)	cysteine synthase A	2.05163	0.00108232	0.0440006	1.7173	0.000344456	0.0192988
YPK_1431	YPK_1431	NC_010637	1580900..1581886	cell division protein ZipA	2.1179	0.00363423	0.0967628	1.66453	0.00184043	0.0615356
YPK_1457	YPK_1457	NC_010638	1609403..1610251	hypothetical protein	-1.00668	0.0489463	0.434758	-0.902492	0.0337402	0.377663
YPK_1460	YPK_1460	NC_010639	1611426..1611950	hypothetical protein	7.44942	7.44e-05	0.00523987	2.28919	0.000530051	0.0252597
YPK_1463	YPK_1463	NC_010640	complement(1614711..1615730)	extracellular solute-binding protein	1.32415	0.0353447	0.368981	1.06955	0.0343483	0.378474
YPK_1470	YPK_1470	NC_010641	complement(1623607..1624638)	hypothetical protein	-1.31354	0.012384	0.212843	-1.2011	0.00273451	0.0815632
YPK_1479	YPK_1479	NC_010642	1637456..1637980	type VI secretion protein	-2.21397	0.0140758	0.229171	-1.44689	0.0218243	0.303636
YPK_1482	YPK_1482	NC_010643	1640577..1641137	hypothetical protein	-1.61036	0.0208253	0.281307	-1.35821	0.0058313	0.132566
YPK_1507	YPK_1507	NC_010644	1668376..1668672	hypothetical protein	1.72087	0.0139262	0.229105	1.35453	0.0107772	0.192597
YPK_1521	YPK_1521	NC_010645	complement(1683587..1684282)	aspartate racemase	-1.77584	0.0301719	0.339273	-1.30442	0.027545	0.3448
YPK_1538	YPK_1538	NC_010646	1700733..1701515	cationic amino acid ABC transporter periplasmicbinding protein	2.27627	0.00793118	0.158175	1.57207	0.00924929	0.180885
YPK_1542	YPK_1542	NC_010647	complement(1703945..1704853)	hypothetical protein	NA	NA	NA	-1.08277	0.0372863	0.390376
YPK_1550	YPK_1550	NC_010648	complement(1711361..1713514)	phosphate acetyltransferase	NA	NA	NA	0.862991	0.0235129	0.317539
YPK_1562	YPK_1562	NC_010649	1726067..1727863	bifunctional NADH:ubiquinone oxidoreductasesubunit C/D	NA	NA	NA	0.817862	0.0314029	0.3677
YPK_1564	YPK_1564	NC_010650	1728426..1729811	NADH dehydrogenase I subunit F	1.24204	0.0278517	0.328901	1.03482	0.0303237	0.363358
YPK_1573	YPK_1573	NC_010651	1740149..1741228	hypothetical protein	-1.95918	0.0141852	0.229171	-1.49794	0.00862222	0.170278
YPK_1579	YPK_1579	NC_010652	1747561..1748511	NAD-binding D-isomer specific 2-hydroxyaciddehydrogenase	-1.62544	0.0253312	0.315931	-1.17433	0.04914	0.43533
YPK_1580	YPK_1580	NC_010653	1748874..1750190	major facilitator transporter	NA	NA	NA	-0.848273	0.0276106	0.3448
YPK_1590	YPK_1590	NC_010654	1758906..1759724	acyl-CoA thioester hydrolase YfbB	-1.71871	0.0374264	0.380382	-1.29947	0.0245784	0.323636
YPK_1595	YPK_1595	NC_010655	complement(1764376..1764636)	hypothetical protein	6.1538	0.00573173	0.125564	1.29145	0.0400625	0.40331
YPK_1604	YPK_1604	NC_010656	complement(1773960..1774457)	N-acetyltransferase GCN5	6.56865	0.00262352	0.0804952	1.35279	0.0320254	0.368826
YPK_1624	YPK_1624	NC_010657	1803665..1803931	transposase IS3/IS911 family protein	5.8662	0.00986705	0.183779	NA	NA	NA
YPK_1641	YPK_1641	NC_010658	complement(1819765..1821009)	mechanosensitive ion channel MscS	-1.76165	0.00294318	0.0870192	-1.49094	0.00223956	0.0701469
YPK_1655	YPK_1655	NC_010659	1837676..1838413	LuxR family transcriptional regulator	-1.38489	0.0351273	0.368531	-1.20507	0.00938574	0.181757
YPK_1659	YPK_1659	NC_010660	complement(1842610..1842855)	hypothetical protein	-3.56002	0.0366865	0.377398	NA	NA	NA
YPK_1675	YPK_1675	NC_010661	complement(1860017..1861063)	dihydroorotase	NA	NA	NA	1.15416	0.0445591	0.422038
YPK_1681	YPK_1681	NC_010662	1868584..1869108	hypothetical protein	1.24719	0.030069	0.339018	1.02727	0.0378826	0.393637
YPK_1685	YPK_1685	NC_010663	1871351..1872280	malonyl CoA-acyl carrier protein transacylase	1.21082	0.0383679	0.383498	1.04319	0.0186472	0.279102
YPK_1686	YPK_1686	NC_010664	1872294..1873028	3-ketoacyl-ACP reductase	2.2458	0.00175435	0.0620138	1.67801	0.00319232	0.0888279
YPK_1687	YPK_1687	NC_010665	1873182..1873418	acyl carrier protein	2.28919	0.00445615	0.110827	1.71288	0.00242185	0.0743778
YPK_1694	YPK_1694	NC_010666	1880016..1881449	PTS system glucose-specific transporter subunitIIBC	1.23105	0.010596	0.193939	1.09906	0.00478317	0.115291
YPK_1731	YPK_1731	NC_010667	complement(1919866..1920069)	hypothetical protein	3.65154	5.95e-09	1.57e-06	2.87333	6.01e-08	1.78e-05
YPK_1758	YPK_1758	NC_010668	1953337..1953726	chemotaxis regulatory protein CheY	1.55679	0.040722	0.394892	NA	NA	NA
YPK_1761	YPK_1761	NC_010669	1956058..1958688	YadA domain-containing protein	-1.3792	0.0224588	0.297809	-1.20473	0.0079022	0.162191
YPK_1771	YPK_1771	NC_010670	1965827..1966216	hypothetical protein	3.67853	9.01e-05	0.00614532	2.32873	0.000168121	0.0120178
YPK_1776	YPK_1776	NC_010671	complement(1971301..1971858)	spore coat U domain-containing protein	NA	NA	NA	-1.1033	0.0468462	0.428328
YPK_1782	YPK_1782	NC_010672	1978121..1978834	putative solute/DNA competence effector	1.75539	0.00327993	0.090049	1.48762	0.0014507	0.0509713
YPK_1806	YPK_1806	NC_010673	complement(2006761..2007969)	transposase mutator type	8.84075	2.21e-09	7.77e-07	3.23671	5.88e-07	0.00011084
YPK_1815	YPK_1815	NC_010674	complement(2014108..2015076)	periplasmic solute binding protein	1.02972	0.049495	0.435968	0.880432	0.0473998	0.428328
YPK_1818	YPK_1818	NC_010675	2017074..2017325	hypothetical protein	2.94775	0.0433681	0.406477	NA	NA	NA
YPK_1821	YPK_1821	NC_010676	2020820..2021170	translation initiation factor IF-3	NA	NA	NA	0.873738	0.0433685	0.418153
YPK_1824	YPK_1824	NC_010677	2022357..2023340	phenylalanyl-tRNA synthetase subunit alpha	NA	NA	NA	0.85577	0.0463534	0.427529
YPK_1836	YPK_1836	NC_010678	2036509..2036853	hypothetical protein	2.82144	0.0290441	0.330291	NA	NA	NA
YPK_1840	YPK_1840	NC_010679	2039173..2040636	hypothetical protein	NA	NA	NA	-0.860912	0.0399261	0.40331
YPK_1854	YPK_1854	NC_010680	complement(2059668..2059904)	LPP repeat-containing protein	2.6782	0.000415444	0.0216852	1.99008	0.000460214	0.0234715
YPK_1855	YPK_1855	NC_010681	complement(2060225..2061637)	pyruvate kinase	1.34301	0.0106533	0.194147	1.09306	0.0301457	0.362272
YPK_1869	YPK_1869	NC_010682	complement(2074596..2075003)	lactoylglutathione lyase	2.66105	0.00651397	0.137083	1.73502	0.00518319	0.122797
YPK_1871	YPK_1871	NC_010683	complement(2076501..2077598)	N-ethylmaleimide reductase	1.64861	0.0143374	0.229171	1.23377	0.0305357	0.363757
YPK_1883	YPK_1883	NC_010684	complement(2088741..2089346)	glutathionine S-transferase	1.83604	0.00393988	0.102195	1.5117	0.00234794	0.072646
YPK_1891	YPK_1891	NC_010685	complement(2097450..2098415)	binding-protein-dependent transport system innermembrane protein	-1.43813	0.0306152	0.3411	NA	NA	NA
YPK_1895	YPK_1895	NC_010686	2102713..2102940	phage shock protein B	5.02883	0.0325492	0.350626	NA	NA	NA
YPK_1901	YPK_1901	NC_010687	complement(2106592..2107038)	hypothetical protein	3.04293	0.00451796	0.111058	1.82778	0.00413595	0.106533
YPK_1914	YPK_1914	NC_010688	2122843..2123175	small multidrug resistance protein	-2.63836	0.00309998	0.088559	-1.87294	0.00179913	0.0606437
YPK_1940	YPK_1940	NC_010689	complement(2152363..2153316)	hypothetical protein	-1.15851	0.0487956	0.434332	-1.01517	0.0245889	0.323636
YPK_1950	YPK_1950	NC_010690	complement(2165246..2166913)	acetolactate synthase catalytic subunit	-1.23069	0.0347048	0.36696	NA	NA	NA
YPK_1959	YPK_1959	NC_010691	2178526..2178675	hypothetical protein	-6.48789	0.000868924	0.0367381	-1.7373	0.00701028	0.151378
YPK_1967	YPK_1967	NC_010692	2184938..2186392	Na+/H+ antiporter NhaC	-1.14557	0.0423358	0.399544	-1.03376	0.0130222	0.219472
YPK_1975	YPK_1975	NC_010693	2194759..2196603	Fis family GAF modulated sigma54 specifictranscriptional regulator	NA	NA	NA	-0.786466	0.0398301	0.40331
YPK_1990	YPK_1990	NC_010694	2211970..2212899	hypothetical protein	1.8549	0.0339571	0.360731	1.28117	0.0345407	0.378474
YPK_1993	YPK_1993	NC_010695	2214718..2215722	adenosine deaminase	1.43743	0.0451695	0.41019	NA	NA	NA
YPK_2023	YPK_2023	NC_010696	complement(2252638..2252964)	translation initiation factor Sui1	3.40377	0.000665787	0.0310632	2.17361	0.000456343	0.0234715
YPK_2070	YPK_2070	NC_010697	complement(2296993..2298630)	extracellular solute-binding protein	NA	NA	NA	-0.865301	0.0441972	0.421773
YPK_2071	YPK_2071	NC_010698	complement(2299467..2300111)	hypothetical protein	-1.63123	0.0229945	0.29918	-1.32668	0.011625	0.201662
YPK_2072	YPK_2072	NC_010699	2300981..2303656	bifunctional acetaldehyde-CoA/alcoholdehydrogenase	2.16581	1.78e-05	0.00167524	1.88854	1.36e-05	0.00171083
YPK_2074	YPK_2074	NC_010700	2305747..2306154	global DNA-binding transcriptional dualregulator H-NS	3.63276	2.16e-09	7.77e-07	2.88075	3.76e-08	1.2e-05
YPK_2094	YPK_2094	NC_010701	complement(2323904..2324278)	hypothetical protein	3.32213	0.0148922	0.229199	1.43969	0.0291509	0.358634
YPK_2096	YPK_2096	NC_010702	2325008..2326003	glyceraldehyde-3-phosphate dehydrogenase	2.55596	1.23e-06	0.000172871	2.14244	8.8e-06	0.00117756
YPK_2097	YPK_2097	NC_010703	2326327..2327202	aldose 1-epimerase	1.88293	0.000352643	0.0191151	1.43076	0.0100075	0.187599
YPK_2098	YPK_2098	NC_010704	complement(2327275..2328045)	MltA-interacting MipA family protein	1.65849	0.00707977	0.145307	1.40062	0.0029325	0.0849074
YPK_2101	YPK_2101	NC_010705	2330446..2330568	hypothetical protein	4.88283	0.0394625	0.391661	NA	NA	NA
YPK_2118	YPK_2118	NC_010706	complement(2349019..2349675)	hypothetical protein	2.33585	0.00316347	0.0892235	1.63627	0.0059952	0.133683
YPK_2123	YPK_2123	NC_010707	2353492..2353761	cell division topological specificity factorMinE	7.51733	5.32e-05	0.00394286	2.25951	0.000626714	0.0288706
YPK_2136	YPK_2136	NC_010708	2367143..2368585	pyruvate kinase	1.24482	0.0161978	0.238621	1.10078	0.00629891	0.138911
YPK_2143	YPK_2143	NC_010709	complement(2374118..2375122)	Holliday junction DNA helicase RuvB	NA	NA	NA	-1.05987	0.0345817	0.378474
YPK_2146	YPK_2146	NC_010710	complement(2376936..2377679)	hypothetical protein	1.29234	0.0401057	0.392676	1.07954	0.022756	0.310811
YPK_2161	YPK_2161	NC_010711	complement(2398818..2399402)	ribosomal-protein-S5-alanineN-acetyltransferase	2.07829	0.000613291	0.0291348	1.75471	0.000196147	0.0131165
YPK_2182	YPK_2182	NC_010712	2421027..2421959	4-diphosphocytidyl-2-C-methyl-D-erythritolkinase	4.2132	0.000272001	0.0156567	2.29963	0.0003688	0.0201169
YPK_2194	YPK_2194	NC_010713	2432342..2432764	carboxymuconolactone decarboxylase	6.36416	0.00365143	0.0967628	1.39122	0.0287023	0.356286
YPK_2196	YPK_2196	NC_010714	2433502..2434575	hypothetical protein	-1.60066	0.0184771	0.264401	-1.35216	0.00578653	0.132547
YPK_2199	YPK_2199	NC_010715	2437185..2438135	hypothetical protein	1.7123	0.00111241	0.0447931	1.52379	0.000153732	0.0111819
YPK_2200	YPK_2200	NC_010716	2438181..2438324	hypothetical protein	3.54403	2.99e-05	0.00252923	2.35153	0.000128038	0.010016
YPK_2223	YPK_2223	NC_010717	2463580..2464386	N-formylglutamate amidohydrolase	2.62195	0.00962192	0.180733	1.53001	0.0181353	0.273414
YPK_2224	YPK_2224	NC_010718	complement(2464981..2466063)	porin	1.35686	0.011794	0.206721	1.17951	0.00573606	0.132389
YPK_2229	YPK_2229	NC_010719	complement(2471837..2473177)	bifunctional succinylornithinetransaminase/acetylornithine transaminase	NA	NA	NA	-0.989899	0.0480377	0.43016
YPK_2241	YPK_2241	NC_010720	complement(2486293..2488767)	outer membrane protein	1.31866	0.0132831	0.22198	1.12503	0.0125513	0.213269
YPK_2250	YPK_2250	NC_010721	complement(2497267..2497404)	hypothetical protein	-4.54041	0.000510425	0.0253891	-2.35913	0.000317953	0.0183088
YPK_2257	YPK_2257	NC_010722	complement(2508008..2509192)	GntR family transcriptional regulator	1.48971	0.00202241	0.0693129	1.34175	0.000282004	0.0167027
YPK_2258	YPK_2258	NC_010723	2509544..2510143	Na(+)-translocating NADH-quinone reductasesubunit E	NA	NA	NA	-1.20089	0.0332711	0.375066
YPK_2284	YPK_2284	NC_010724	complement(2537261..2538058)	GntR family transcriptional regulator	NA	NA	NA	-1.15076	0.0274405	0.3448
YPK_2296	YPK_2296	NC_010725	2543422..2543781	baseplate assembly protein V	5.28348	0.0230683	0.29918	NA	NA	NA
YPK_2297	YPK_2297	NC_010726	2543778..2544077	GPW/gp25 family protein	5.05909	0.0309185	0.341314	NA	NA	NA
YPK_2300	YPK_2300	NC_010727	2545760..2546929	tail sheath protein	2.33542	0.0283943	0.328901	1.31757	0.0432945	0.418153
YPK_2301	YPK_2301	NC_010728	2546941..2547456	phage major tail tube protein	6.5944	0.00212429	0.0704791	1.5728	0.0150323	0.244407
YPK_2310	YPK_2310	NC_010729	complement(2555352..2555744)	XRE family transcriptional regulator	7.52997	5.16e-05	0.00389382	2.20745	0.000832793	0.0358937
YPK_2316	YPK_2316	NC_010730	2556901..2557161	hypothetical protein	-4.6884	0.020459	0.279357	NA	NA	NA
YPK_2318	YPK_2318	NC_010731	2557580..2558341	hypothetical protein	-1.97673	0.00484193	0.113732	-1.6073	0.00215434	0.0681824
YPK_2324	YPK_2324	NC_010732	2563486..2563830	putative bacteriophage protein GP46	6.39544	0.0036072	0.0967628	1.3664	0.0310642	0.364851
YPK_2328	YPK_2328	NC_010733	2568200..2569015	capsid scaffolding	-1.87051	0.0387065	0.38597	-1.33358	0.0266311	0.341398
YPK_2335	YPK_2335	NC_010734	2572498..2572920	putative LysB-like protein	5.25817	0.0248619	0.312846	NA	NA	NA
YPK_2339	YPK_2339	NC_010735	2574261..2574962	hypothetical protein	-1.41746	0.0204836	0.279357	-1.25596	0.00439656	0.10967
YPK_2348	YPK_2348	NC_010736	2581037..2581552	phage major tail tube protein	6.26039	0.00465594	0.111501	1.34938	0.0331602	0.375066
YPK_2352	YPK_2352	NC_010737	2585468..2586562	late control D family protein	2.1388	0.0130444	0.219006	1.47802	0.0140695	0.230561
YPK_2363	YPK_2363	NC_010738	2597370..2597969	TrpR binding protein WrbA	1.54405	0.0396616	0.392676	NA	NA	NA
YPK_2379	YPK_2379	NC_010739	complement(2613390..2613542)	hypothetical protein	-4.53518	0.00257863	0.0804952	NA	NA	NA
YPK_2411	YPK_2411	NC_010740	complement(2642715..2643794)	monosaccharide-transporting ATPase	-1.26919	0.032872	0.35242	-1.12514	0.0101303	0.188343
YPK_2430	YPK_2430	NC_010741	complement(2663458..2663880)	flagellar FlhE family protein	3.4418	0.0361037	0.373219	NA	NA	NA
YPK_2439	YPK_2439	NC_010742	2671957..2672187	DNA polymerase III subunit theta	6.35536	0.00372411	0.0971946	1.41858	0.0262649	0.338181
YPK_2442	YPK_2442	NC_010743	complement(2673919..2675970)	oligopeptidase B	1.00092	0.0414494	0.398291	0.894722	0.0163256	0.254459
YPK_2452	YPK_2452	NC_010744	complement(2685327..2685824)	4-hydroxyphenylacetate 3-monooxygenase,reductase subunit	NA	NA	NA	-1.11942	0.0449357	0.423992
YPK_2462	YPK_2462	NC_010745	2695107..2695574	MarR family transcriptional regulator	-2.06804	0.0152666	0.233023	-1.51908	0.00971495	0.183919
YPK_2464	YPK_2464	NC_010746	2697931..2698905	PTS system mannose/fructose/sorbose familytransporter subunit IIB	1.27875	0.00911146	0.175657	1.13925	0.00413696	0.106533
YPK_2466	YPK_2466	NC_010747	2699810..2700688	PTS system mannose-specific transporter subunitIID	1.47421	0.00450346	0.111058	1.20912	0.0163993	0.254649
YPK_2467	YPK_2467	NC_010748	2700888..2701349	hypothetical protein	7.47471	7.24e-05	0.00518632	2.24941	0.000662895	0.0302018
YPK_2468	YPK_2468	NC_010749	2701775..2702344	hypothetical protein	-1.53317	0.0318066	0.346605	-1.18381	0.0351853	0.380531
YPK_2474	YPK_2474	NC_010750	complement(2710035..2710244)	cold shock-like protein CspC	2.53154	0.0202318	0.278632	1.47732	0.0223237	0.307489
YPK_2478	YPK_2478	NC_010751	complement(2713919..2714164)	hypothetical protein	-3.44333	0.0286844	0.328901	NA	NA	NA
YPK_2480	YPK_2480	NC_010752	complement(2714835..2715110)	hypothetical protein	6.7877	0.00151384	0.0565826	1.49123	0.0198226	0.287479
YPK_2486	YPK_2486	NC_010753	complement(2717470..2717634)	hypothetical protein	5.67922	0.0130533	0.219006	NA	NA	NA
YPK_2492	YPK_2492	NC_010754	2724271..2725578	galactoside permease	1.63199	0.00819587	0.161173	1.38345	0.00290547	0.0848315
YPK_2494	YPK_2494	NC_010755	2727799..2727963	hypothetical protein	4.80982	0.0421896	0.399055	NA	NA	NA
YPK_2529	YPK_2529	NC_010756	2771211..2771801	imidazole glycerol phosphate synthase subunitHisH	2.18969	0.0409511	0.396204	1.31625	0.0404509	0.404785
YPK_2530	YPK_2530	NC_010757	2771807..2772544	1-(5-phosphoribosyl)-5-[(5-phosphoribosylamino)methylideneamino]imidazole-4-carboxamide isomerase	-1.66255	0.028483	0.328901	-1.21133	0.0412041	0.40967
YPK_2535	YPK_2535	NC_010758	complement(2774820..2776229)	6-phosphogluconate dehydrogenase	1.77366	0.000799047	0.0353433	1.51184	0.00102416	0.0416291
YPK_2539	YPK_2539	NC_010759	2781473..2783734	TonB-dependent siderophore receptor	NA	NA	NA	-0.772788	0.0249389	0.326173
YPK_2552	YPK_2552	NC_010760	complement(2799070..2799711)	uridine kinase	2.44079	0.00698785	0.14412	1.67033	0.00593355	0.133683
YPK_2564	YPK_2564	NC_010761	complement(2814784..2815794)	beta-methylgalactoside transporter innermembrane protein	-1.02779	0.0411706	0.396625	-0.943154	0.0190255	0.281004
YPK_2575	YPK_2575	NC_010762	2828719..2829981	RND family efflux transporter MFP subunit	-1.55746	0.00309668	0.088559	-1.38791	0.00132326	0.0492302
YPK_2580	YPK_2580	NC_010763	complement(2834624..2835271)	hypothetical protein	NA	NA	NA	-1.00831	0.0461196	0.426812
YPK_2611	YPK_2611	NC_010764	complement(2864728..2865252)	beta-hydroxyacyl-(acyl-carrier-protein)dehydratase FabA/FabZ	-2.20494	0.00817848	0.161173	-1.55284	0.0102539	0.188946
YPK_2615	YPK_2615	NC_010765	complement(2869924..2872968)	cytotoxic necrotizing factor	1.81908	0.00043362	0.0223579	1.47001	0.00435183	0.10967
YPK_2634	YPK_2634	NC_010766	2890003..2890629	3-hydroxydecanoyl-ACP dehydratase	1.69458	0.0493193	0.435852	1.22129	0.0375062	0.391689
YPK_2639	YPK_2639	NC_010767	complement(2895316..2896602)	PqiA family integral membrane protein	-1.02706	0.0398558	0.392676	-0.954593	0.0103851	0.189677
YPK_2643	YPK_2643	NC_010768	complement(2902008..2902559)	hypothetical protein	6.86916	0.000980208	0.0408433	1.72465	0.00821533	0.166647
YPK_2667	YPK_2667	NC_010769	complement(2936156..2936440)	integration host factor subunit beta	1.2367	0.0264587	0.324042	1.03659	0.0300319	0.361955
YPK_2668	YPK_2668	NC_010770	complement(2936501..2938174)	30S ribosomal protein S1	1.25727	0.00863859	0.167541	1.13839	0.00197804	0.0643739
YPK_2677	YPK_2677	NC_010771	2950107..2952389	formate acetyltransferase	1.93207	0.000216055	0.0138406	1.54438	0.00326378	0.0902108
YPK_2683	YPK_2683	NC_010772	complement(2957977..2959311)	recombination factor protein RarA	NA	NA	NA	1.04397	0.035463	0.380714
YPK_2692	YPK_2692	NC_010773	complement(2972071..2974347)	ATP-dependent Clp protease ATP-binding subunit	1.36769	0.00501291	0.114522	1.20034	0.00441748	0.10967
YPK_2700	YPK_2700	NC_010774	2982000..2982896	hypothetical protein	NA	NA	NA	-0.999933	0.047958	0.43016
YPK_2734	YPK_2734	NC_010775	3014184..3015872	hypothetical protein	NA	NA	NA	-0.760126	0.0415845	0.412217
YPK_2744	YPK_2744	NC_010776	complement(3026584..3027651)	2OG-Fe(II) oxygenase	-1.26779	0.0196659	0.272277	-1.13715	0.00686987	0.149123
YPK_2761	YPK_2761	NC_010777	complement(3045935..3046579)	transcriptional regulator CadC	-1.39475	0.00925761	0.176845	-1.25762	0.00286791	0.0843288
YPK_2794	YPK_2794	NC_010778	3084740..3086497	type III restriction protein res subunit	-1.33525	0.0229387	0.29918	-1.12699	0.021688	0.302756
YPK_2807	YPK_2807	NC_010779	complement(3095683..3096423)	RpiR family transcriptional regulator	-2.2556	0.000242627	0.0145086	-1.99583	4.9e-06	0.000752835
YPK_2820	YPK_2820	NC_010780	complement(3107454..3107648)	putative bacteriophage protein	5.0888	0.0298511	0.337461	NA	NA	NA
YPK_2839	YPK_2839	NC_010781	complement(3124680..3125795)	outer membrane porin protein C	2.19542	1.52e-05	0.00149268	1.89817	2.02e-05	0.00245265
YPK_2874	YPK_2874	NC_010782	complement(3172819..3173292)	hypothetical protein	NA	NA	NA	-0.936388	0.0421167	0.412803
YPK_2905	YPK_2905	NC_010783	3199594..3200505	LysR family transcriptional regulator	2.61188	0.0233661	0.301745	1.3162	0.0457412	0.425273
YPK_2907	YPK_2907	NC_010784	complement(3201963..3203327)	two component, sigma54 specific, Fis familytranscriptional regulator	-1.14666	0.0283541	0.328901	-1.03913	0.0106033	0.191137
YPK_2915	YPK_2915	NC_010785	3213130..3213672	transcriptional regulator BetI	2.71445	0.0352388	0.368787	1.31982	0.0456441	0.425273
YPK_2918	YPK_2918	NC_010786	complement(3217139..3217849)	hypothetical protein	1.72059	0.00620302	0.133129	1.4587	0.00169344	0.0583573
YPK_2919	YPK_2919	NC_010787	complement(3217992..3218447)	molybdopterin guanine dinucleotide biosynthesisprotein MoaE	NA	NA	NA	-1.23313	0.0331865	0.375066
YPK_2924	YPK_2924	NC_010788	3221023..3221946	hypothetical protein	-1.74193	0.0145806	0.229171	-1.45857	0.00351933	0.0950247
YPK_2948	YPK_2948	NC_010789	3246334..3247086	phosphoglyceromutase	1.55928	0.00323809	0.0894813	1.29452	0.00845565	0.168544
YPK_2949	YPK_2949	NC_010790	complement(3247268..3248320)	phospho-2-dehydro-3-deoxyheptonate aldolase	NA	NA	NA	-0.808445	0.0469718	0.428328
YPK_2956	YPK_2956	NC_010791	complement(3254339..3255631)	translocation protein TolB	1.99474	0.000116833	0.00771831	1.70847	0.000183532	0.012897
YPK_2959	YPK_2959	NC_010792	complement(3257470..3258147)	colicin uptake protein TolQ	-1.76183	0.0176918	0.256449	-1.36906	0.0139167	0.230561
YPK_2972	YPK_2972	NC_010793	complement(3272044..3272433)	succinate dehydrogenase cytochrome b556 largemembrane subunit	-1.44874	0.0484499	0.434332	-1.15714	0.0315571	0.3677
YPK_2974	YPK_2974	NC_010794	complement(3274531..3275109)	heat shock protein GrpE	1.29434	0.0237537	0.303416	NA	NA	NA
YPK_2977	YPK_2977	NC_010795	3277976..3278317	hypothetical protein	2.06332	0.0306767	0.3411	1.30552	0.0385672	0.397023
YPK_3006	YPK_3006	NC_010796	3307101..3308174	PhoH family protein	-1.47115	0.0403089	0.392676	-1.21015	0.0188527	0.280656
YPK_3020	YPK_3020	NC_010797	3321531..3322001	rRNA large subunit methyltransferase	6.67007	0.00175443	0.0620138	1.6265	0.0122314	0.211297
YPK_3034	YPK_3034	NC_010798	3334593..3335558	hypothetical protein	-1.36944	0.00861434	0.167541	-1.25879	0.00113023	0.0442071
YPK_3035	YPK_3035	NC_010799	complement(3335937..3336131)	hypothetical protein	7.1417	0.000332931	0.0185215	1.95008	0.00305156	0.0856805
YPK_3047	YPK_3047	NC_010800	complement(3349185..3349334)	hypothetical protein	5.1757	0.0266039	0.324042	NA	NA	NA
YPK_3057	YPK_3057	NC_010801	3364145..3364987	hypothetical protein	-1.24448	0.0190449	0.268407	NA	NA	NA
YPK_3059	YPK_3059	NC_010802	3365629..3366006	hypothetical protein	-1.88513	0.0133526	0.222263	-1.52241	0.00400082	0.104323
YPK_3060	YPK_3060	NC_010803	complement(3366134..3366613)	Hcp1 family type VI secretion system effector	NA	NA	NA	-1.00223	0.0361455	0.384254
YPK_3071	YPK_3071	NC_010804	3377386..3377916	hypothetical protein	2.03823	0.0266714	0.324042	1.40752	0.0198309	0.287479
YPK_3089	YPK_3089	NC_010805	3394036..3394236	hypothetical protein	5.32243	0.0218774	0.294579	NA	NA	NA
YPK_3091	YPK_3091	NC_010806	complement(3394937..3395353)	tail assembly chaperone gp38	6.438	0.00306025	0.088559	1.469	0.0219948	0.303968
YPK_3116	YPK_3116	NC_010807	complement(3412087..3413157)	Mu P family protein	3.63926	0.00503319	0.114522	1.71159	0.00952047	0.181757
YPK_3121	YPK_3121	NC_010808	complement(3417641..3418015)	hypothetical protein	2.93479	0.0443337	0.409779	NA	NA	NA
YPK_3122	YPK_3122	NC_010809	complement(3418028..3419461)	Mu tail sheath family protein	3.83707	0.0160133	0.238395	1.33321	0.0408912	0.407536
YPK_3123	YPK_3123	NC_010810	complement(3419458..3419802)	hypothetical protein	4.96401	0.035067	0.368531	NA	NA	NA
YPK_3129	YPK_3129	NC_010811	complement(3423793..3424641)	hypothetical protein	1.80088	0.0456238	0.413056	NA	NA	NA
YPK_3131	YPK_3131	NC_010812	complement(3425308..3425691)	hypothetical protein	6.23634	0.00521555	0.117481	1.25097	0.0450418	0.423992
YPK_3135	YPK_3135	NC_010813	complement(3427548..3427886)	hypothetical protein	6.21414	0.00522386	0.117481	1.30389	0.0383973	0.396996
YPK_3137	YPK_3137	NC_010814	complement(3428872..3429759)	HSR1-like GTP-binding protein	3.40785	0.0112223	0.201049	1.53548	0.0201238	0.289588
YPK_3147	YPK_3147	NC_010815	3439672..3442944	hypothetical protein	NA	NA	NA	-0.825642	0.0211115	0.297715
YPK_3152	YPK_3152	NC_010816	complement(3446999..3448384)	cysteinyl-tRNA synthetase	2.28351	0.00307727	0.088559	1.75137	0.00143645	0.0509713
YPK_3153	YPK_3153	NC_010817	3448595..3449089	peptidyl-prolyl cis-trans isomerase B	2.55382	0.00128568	0.0498703	1.86669	0.00120975	0.046875
YPK_3159	YPK_3159	NC_010818	3454913..3455485	multifunctional acyl-CoA thioesterase I/proteaseI/lysophospholipase L1	-2.05491	0.0147085	0.229199	-1.58884	0.00477107	0.115291
YPK_3162	YPK_3162	NC_010819	3457789..3458703	hypothetical protein	-1.5295	0.0382506	0.383231	-1.25077	0.0162894	0.254459
YPK_3168	YPK_3168	NC_010820	3464737..3464994	hypothetical protein	3.07083	0.0290606	0.330291	NA	NA	NA
YPK_3169	YPK_3169	NC_010821	3465008..3465247	hypothetical protein	NA	NA	NA	-1.29991	0.0491336	0.43533
YPK_3182	YPK_3182	NC_010822	complement(3479306..3480271)	NAD-dependent epimerase/dehydratase	-1.66066	0.00654938	0.137083	-1.39101	0.00574772	0.132389
YPK_3190	YPK_3190	NC_010823	complement(3488912..3489985)	CDP-glucose 4,6-dehydratase	1.47994	0.0310525	0.341901	1.21116	0.0155437	0.24882
YPK_3195	YPK_3195	NC_010824	complement(3494311..3496185)	heat shock protein 90	1.04173	0.0284187	0.328901	0.940725	0.0110465	0.194888
YPK_3197	YPK_3197	NC_010825	complement(3496982..3497314)	hypothetical protein	1.71722	0.0100013	0.183849	1.32893	0.0153411	0.247488
YPK_3210	YPK_3210	NC_010826	3512647..3512907	50S ribosomal protein L31	2.8279	1.65e-06	0.000204989	NA	NA	NA
YPK_3220	YPK_3220	NC_010827	complement(3519721..3520059)	nitrogen regulatory protein P-II 2	-7.75346	5.6e-06	0.000640144	-2.80337	2.14e-05	0.00246391
YPK_3234	YPK_3234	NC_010828	complement(3537786..3538409)	ATP-dependent Clp protease proteolytic subunit	1.9629	0.00366179	0.0967628	1.56708	0.00269676	0.0810201
YPK_3240	YPK_3240	NC_010829	3543719..3543832	hypothetical protein	5.7461	0.0118322	0.206721	NA	NA	NA
YPK_3262	YPK_3262	NC_010830	complement(3566079..3567893)	preprotein translocase subunit SecD	NA	NA	NA	0.808189	0.030515	0.363757
YPK_3267	YPK_3267	NC_010831	3571791..3572393	alkyl hydroperoxide reductase	1.45604	0.00400125	0.103154	1.31379	0.000469825	0.0234715
YPK_3271	YPK_3271	NC_010832	complement(3575590..3577419)	maltodextrin glucosidase	NA	NA	NA	-0.845081	0.0125228	0.213269
YPK_3281	YPK_3281	NC_010833	complement(3592130..3592417)	hypothetical protein	1.68387	0.0373934	0.380382	NA	NA	NA
YPK_3294	YPK_3294	NC_010834	complement(3605112..3605897)	LysR family transcriptional regulator	-1.6808	0.00606855	0.130907	-1.4573	0.00187092	0.0620546
YPK_3297	YPK_3297	NC_010835	3610887..3611834	glycerophosphoryl diester phosphodiesterase	-1.18177	0.0269837	0.326897	-1.00607	0.039952	0.40331
YPK_3338	YPK_3338	NC_010836	3657645..3658817	efflux pump membrane protein	-1.20134	0.0438195	0.408081	-1.0517	0.020027	0.289309
YPK_3346	YPK_3346	NC_010837	3668009..3668551	hypothetical protein	1.97523	0.000237099	0.0145086	1.49878	0.0075725	0.160182
YPK_3353	YPK_3353	NC_010838	3679712..3680074	sigma 54 modulation protein/30S ribosomalprotein S30EA	1.40466	0.00419858	0.106297	1.22703	0.00423499	0.107719
YPK_3356	YPK_3356	NC_010839	complement(3681698..3682819)	bifunctional chorismate mutase/prephenatedehydrogenase	NA	NA	NA	-0.814884	0.03464	0.378474
YPK_3362	YPK_3362	NC_010840	complement(3688408..3689148)	tRNA (guanine-N(1)-)-methyltransferase	1.79306	0.000451773	0.0230132	1.54885	0.000500113	0.0243937
YPK_3363	YPK_3363	NC_010841	complement(3689187..3689735)	16S rRNA-processing protein RimM	1.80147	0.000382374	0.0204643	1.61336	4.33e-05	0.00433239
YPK_3371	YPK_3371	NC_010842	complement(3696742..3697308)	fructose-1-phosphatase	1.34196	0.0493787	0.435852	NA	NA	NA
YPK_3382	YPK_3382	NC_010843	complement(3710438..3711382)	transketolase domain-containing protein	-1.07205	0.0419607	0.399055	-0.938871	0.0428841	0.416387
YPK_3383	YPK_3383	NC_010844	complement(3711375..3712205)	transketolase domain-containing protein	NA	NA	NA	1.09393	0.0445858	0.422038
YPK_3385	YPK_3385	NC_010845	complement(3713593..3715116)	ABC transporter-like protein	NA	NA	NA	-0.817097	0.0321144	0.368826
YPK_3404	YPK_3404	NC_010846	3736290..3737933	tartrate/fumarate subfamily Fe-S typehydro-lyase subunit beta	0.99189	0.041568	0.398525	0.878109	0.0245152	0.323636
YPK_3412	YPK_3412	NC_010847	3745360..3746124	arogenate dehydratase	2.33249	0.0251634	0.314766	1.39604	0.030016	0.361955
YPK_3421	YPK_3421	NC_010848	complement(3753437..3754552)	alcohol dehydrogenase	NA	NA	NA	-0.833351	0.0442651	0.421773
YPK_3422	YPK_3422	NC_010849	3755035..3755490	ribose-5-phosphate isomerase B	2.63644	0.0225998	0.29815	1.46624	0.0244881	0.323636
YPK_3426	YPK_3426	NC_010850	complement(3760292..3761275)	lipoprotein NlpD	1.52206	0.00261283	0.0804952	1.36755	0.000411548	0.0218753
YPK_3428	YPK_3428	NC_010851	complement(3762017..3762781)	stationary phase survival protein SurE	1.79683	0.0486475	0.434332	NA	NA	NA
YPK_3440	YPK_3440	NC_010852	complement(3772466..3773200)	phosphoadenosine phosphosulfate reductase	2.13107	0.00992968	0.183849	NA	NA	NA
YPK_3441	YPK_3441	NC_010853	complement(3773197..3774927)	sulfite reductase subunit beta	1.0388	0.0330494	0.352861	0.941097	0.00790072	0.162191
YPK_3446	YPK_3446	NC_010854	complement(3779467..3780762)	phosphopyruvate hydratase	0.957944	0.0470684	0.425225	0.83826	0.0457481	0.425273
YPK_3447	YPK_3447	NC_010855	complement(3780843..3782480)	CTP synthetase	1.0943	0.027134	0.327779	0.966923	0.0163204	0.254459
YPK_3460	YPK_3460	NC_010856	complement(3799266..3801263)	iron-hydroxamate transporter permease subunit	NA	NA	NA	-0.70463	0.0420252	0.412803
YPK_3468	YPK_3468	NC_010857	3810277..3810732	RNA polymerase-binding transcription factor	2.01499	0.00084124	0.0359269	1.69942	0.000306994	0.0179267
YPK_3473	YPK_3473	NC_010858	3815212..3816066	pantoate--beta-alanine ligase	2.12749	0.0110427	0.199955	1.51081	0.0110024	0.194888
YPK_3474	YPK_3474	NC_010859	3816477..3816857	aspartate alpha-decarboxylase	2.91996	0.0474249	0.427241	NA	NA	NA
YPK_3488	YPK_3488	NC_010860	complement(3831618..3832076)	transposase IS200-family protein	5.67922	0.0130533	0.219006	NA	NA	NA
YPK_3490	YPK_3490	NC_010861	complement(3834048..3835634)	dihydrolipoamide acetyltransferase	1.42659	0.00587776	0.128081	1.21264	0.0082801	0.166647
YPK_3506	YPK_3506	NC_010862	complement(3851831..3852289)	transposase IS200-family protein	-1.98993	0.0307377	0.3411	NA	NA	NA
YPK_3513	YPK_3513	NC_010863	complement(3858340..3859491)	cell division protein FtsZ	1.7982	0.000743689	0.0341773	1.59063	9.26e-05	0.00783693
YPK_3516	YPK_3516	NC_010864	complement(3861676..3862596)	D-alanine--D-alanine ligase	1.43495	0.0224585	0.297809	1.09672	0.0497349	0.436697
YPK_3525	YPK_3525	NC_010865	complement(3873542..3873859)	cell division protein FtsL	6.25319	0.00469421	0.111501	1.35387	0.0327064	0.374587
YPK_3528	YPK_3528	NC_010866	3876381..3876821	hypothetical protein	2.6104	0.00741074	0.149917	1.66468	0.00789697	0.162191
YPK_3532	YPK_3532	NC_010867	complement(3881097..3882902)	AMP-dependent synthetase and ligase	NA	NA	NA	0.867573	0.024877	0.326173
YPK_3563	YPK_3563	NC_010868	complement(3925548..3926066)	hypothetical protein	NA	NA	NA	0.948885	0.0465064	0.427529
YPK_3577	YPK_3577	NC_010869	complement(3941038..3941259)	hypothetical protein	-1.6457	0.0487332	0.434332	NA	NA	NA
YPK_3583	YPK_3583	NC_010870	complement(3948048..3949223)	carbamoyl phosphate synthase small subunit	NA	NA	NA	0.858019	0.0347802	0.378474
YPK_3594	YPK_3594	NC_010871	complement(3961444..3963354)	molecular chaperone DnaK	1.36005	0.00482092	0.113732	1.21884	0.0016554	0.0576747
YPK_3596	YPK_3596	NC_010872	3964629..3967085	N-acetyltransferase GCN5	-1.28779	0.00649507	0.137083	-1.21135	0.000449208	0.0234715
YPK_3604	YPK_3604	NC_010873	complement(3974849..3977308)	bifunctional aspartokinase I/homoserinedehydrogenase I	-0.995668	0.0400123	0.392676	-0.891355	0.035442	0.380714
YPK_3608	YPK_3608	NC_010874	complement(3979765..3979950)	hypothetical protein	NA	NA	NA	-1.31761	0.0425574	0.415532
YPK_3610	YPK_3610	NC_010875	complement(3980857..3981504)	phosphoglycerate mutase	NA	NA	NA	0.971918	0.0486007	0.433426
YPK_3627	YPK_3627	NC_010876	complement(4002740..4003537)	deoxyribose-phosphate aldolase	-1.36558	0.0404006	0.392676	-1.16137	0.0176102	0.269212
YPK_3634	YPK_3634	NC_010877	complement(4011177..4011620)	ribosomal-protein-alanine N-acetyltransferase	6.59575	0.00213371	0.0704791	1.52689	0.0177267	0.269212
YPK_3646	YPK_3646	NC_010878	complement(4024171..4025403)	O-antigen polymerase	NA	NA	NA	-0.75362	0.041858	0.412217
YPK_3659	YPK_3659	NC_010879	4041111..4041431	putative PTS system fructose-like transportersubunit EIIB	-1.63316	0.0273161	0.328901	-1.30833	0.0157924	0.251829
YPK_3662	YPK_3662	NC_010880	complement(4042738..4043274)	hypothetical protein	-1.3992	0.00806341	0.160057	-1.28074	0.00123544	0.0474274
YPK_3676	YPK_3676	NC_010881	complement(4059757..4061022)	integrase family protein	NA	NA	NA	-0.893221	0.0293634	0.359117
YPK_3678	YPK_3678	NC_010882	complement(4062486..4063580)	YjgP/YjgQ family permease	-0.975677	0.0431112	0.405054	-0.913048	0.0113133	0.19791
YPK_3683	YPK_3683	NC_010883	complement(4070035..4070466)	hypothetical protein	1.34869	0.0205487	0.279357	1.09069	0.0332565	0.375066
YPK_3703	YPK_3703	NC_010884	complement(4090025..4090663)	hypothetical protein	3.79262	8.35e-06	0.000882658	2.71816	2.28e-06	0.000391078
YPK_3709	YPK_3709	NC_010885	complement(4095424..4096737)	extracellular solute-binding protein	1.39867	0.0322337	0.349446	1.15954	0.0178516	0.270119
YPK_3714	YPK_3714	NC_010886	complement(4101750..4102352)	sterol-binding domain-containing protein	1.52725	0.0450996	0.41019	1.17923	0.0310237	0.364851
YPK_3720	YPK_3720	NC_010887	4110818..4111873	hypothetical protein	-1.82379	0.00861432	0.167541	-1.38535	0.015262	0.247174
YPK_3724	YPK_3724	NC_010888	complement(4113067..4115061)	ATP-dependent RNA helicase DeaD	1.04966	0.0376393	0.381629	0.924748	0.0237983	0.319314
YPK_3725	YPK_3725	NC_010889	complement(4115248..4116132)	lipoprotein NlpI	1.03162	0.0379387	0.3824	0.918588	0.0202558	0.289588
YPK_3726	YPK_3726	NC_010890	complement(4116257..4118374)	polynucleotide phosphorylase/polyadenylase	1.16625	0.0137967	0.227861	1.07114	0.00133805	0.0492302
YPK_3744	YPK_3744	NC_010891	4137424..4137795	hypothetical protein	6.3775	0.00351779	0.0953412	1.42214	0.0258956	0.335509
YPK_3748	YPK_3748	NC_010892	complement(4139579..4140007)	hypothetical protein	2.50793	0.0373747	0.380382	NA	NA	NA
YPK_3757	YPK_3757	NC_010893	complement(4145797..4146108)	50S ribosomal protein L21	1.94643	0.000232069	0.0144293	1.67591	0.000193486	0.0131165
YPK_3775	YPK_3775	NC_010894	complement(4164621..4165361)	adenosine-3'(2'),5'-bisphosphate nucleotidase	1.87077	0.00714472	0.145932	1.51393	0.00299426	0.0856152
YPK_3781	YPK_3781	NC_010895	complement(4170997..4171449)	50S ribosomal protein L9	1.85244	0.0228695	0.29918	NA	NA	NA
YPK_3785	YPK_3785	NC_010896	complement(4172453..4172731)	hypothetical protein	NA	NA	NA	-0.95291	0.0490834	0.43533
YPK_3795	YPK_3795	NC_010897	complement(4182405..4183409)	FtsH protease regulator HflC	1.36837	0.0411822	0.396625	1.12467	0.0224523	0.308236
YPK_3805	YPK_3805	NC_010898	4193591..4194730	iron-sulfur cluster binding protein	-1.31591	0.0119825	0.207696	-1.17733	0.00599734	0.133683
YPK_3813	YPK_3813	NC_010899	4204175..4205998	fumarate reductase flavoprotein subunit	1.16767	0.0155378	0.23462	1.05128	0.00481076	0.115291
YPK_3822	YPK_3822	NC_010900	complement(4211358..4213004)	chaperonin GroEL	2.21802	1.86e-05	0.00171041	1.82989	0.000226595	0.0138157
YPK_3823	YPK_3823	NC_010901	complement(4213051..4213344)	co-chaperonin GroES	2.28683	2.96e-05	0.00252923	1.91574	6.66e-05	0.00627612
YPK_3839	YPK_3839	NC_010902	complement(4230093..4230359)	hypothetical protein	2.27167	0.0314322	0.345183	1.37528	0.0318063	0.368349
YPK_3850	YPK_3850	NC_010903	complement(4239275..4239823)	single-stranded DNA-binding protein	1.68125	0.0192057	0.269772	1.29159	0.0192847	0.283526
YPK_3856	YPK_3856	NC_010904	4248397..4249380	quinone oxidoreductase	1.56626	0.0144573	0.229171	1.3114	0.00572393	0.132389
YPK_3882	YPK_3882	NC_010905	4282619..4283578	hypothetical protein	1.33785	0.0451901	0.41019	1.09539	0.0269086	0.342146
YPK_3884	YPK_3884	NC_010906	4284778..4285578	methylenetetrahydrofolate reductase	NA	NA	NA	-1.02783	0.0292487	0.358773
YPK_3886	YPK_3886	NC_010907	4287229..4287792	hypothetical protein	1.31909	0.011502	0.20433	1.16419	0.00481025	0.115291
YPK_3889	YPK_3889	NC_010908	4288884..4290914	TonB-dependent heme/hemoglobin receptor familyprotein	1.17952	0.0158661	0.237878	1.04654	0.00954126	0.181757
YPK_3890	YPK_3890	NC_010909	4291033..4292070	hemin-degrading family protein	1.6634	0.00174769	0.0620138	1.41087	0.00252909	0.0765372
YPK_3896	YPK_3896	NC_010910	4297524..4298507	LysR family transcriptional regulator	-1.60664	0.00966075	0.180733	-1.33336	0.00828011	0.166647
YPK_3898	YPK_3898	NC_010911	complement(4298851..4300065)	hypothetical protein	NA	NA	NA	-0.758403	0.0433236	0.418153
YPK_3908	YPK_3908	NC_010912	complement(4308450..4309097)	HrpE/YscL family type III secretion apparatusprotein	1.63047	0.044315	0.409779	1.17335	0.0452013	0.423992
YPK_3932	YPK_3932	NC_010913	complement(4336762..4338093)	proline dipeptidase	NA	NA	NA	-0.708323	0.0405074	0.404785
YPK_3942	YPK_3942	NC_010914	complement(4348362..4348628)	twin arginine-targeting protein translocase	2.04038	0.0224695	0.297809	1.3999	0.0212533	0.298699
YPK_3962	YPK_3962	NC_010915	complement(4370998..4372317)	glycerol-3-phosphate transporter periplasmicbinding protein	-1.36003	0.00928562	0.176845	-1.17091	0.0130854	0.219611
YPK_3968	YPK_3968	NC_010916	4377954..4379060	hypothetical protein	1.77481	0.0152325	0.233023	1.32243	0.0194652	0.285168
YPK_3976	YPK_3976	NC_010917	complement(4385900..4386757)	RNA polymerase factor sigma-32	1.93485	0.000408007	0.0215631	1.67625	0.000144757	0.0107172
YPK_3981	YPK_3981	NC_010918	4391190..4391462	hypothetical protein	7.17054	0.000274029	0.0156567	2.03679	0.00201848	0.0643739
YPK_3993	YPK_3993	NC_010919	complement(4404375..4405574)	hypothetical protein	-1.02795	0.0451935	0.41019	-0.919953	0.0310308	0.364851
YPK_4004	YPK_4004	NC_010920	complement(4415441..4416271)	hypothetical protein	1.21842	0.0303566	0.340444	1.03806	0.023702	0.319054
YPK_4029	YPK_4029	NC_010921	complement(4443326..4444393)	dTDP-glucose 4,6-dehydratase	1.16295	0.0260288	0.322727	0.997698	0.0234151	0.317251
YPK_4035	YPK_4035	NC_010922	complement(4451596..4451922)	thioredoxin	4.11956	3.05e-05	0.00253034	2.60804	2.29e-05	0.00257104
YPK_4037	YPK_4037	NC_010923	4453331..4454827	guanosine pentaphosphate phosphohydrolase	NA	NA	NA	-0.747578	0.0290118	0.357985
YPK_4039	YPK_4039	NC_010924	4457033..4457200	hypothetical protein	5.6731	0.014206	0.229171	NA	NA	NA
YPK_4040	YPK_4040	NC_010925	4457205..4457501	PpiC-type peptidyl-prolyl cis-trans isomerase	3.76776	0.000304809	0.0171831	2.21786	0.000475545	0.0234715
YPK_4041	YPK_4041	NC_010926	4457740..4458531	glutamine cyclotransferase	-1.23791	0.0452102	0.41019	-1.09847	0.0131364	0.219611
YPK_4042	YPK_4042	NC_010927	4459323..4459853	fimbrial protein	-3.35546	0.00290985	0.0866398	-2.13043	0.000765167	0.0341116
YPK_4060	YPK_4060	NC_010928	complement(4478882..4479139)	acetolactate synthase 2 regulatory subunit	2.68837	0.0177882	0.256684	1.36079	0.03879	0.398077
YPK_4063	YPK_4063	NC_010929	complement(4483185..4483523)	hypothetical protein	6.90404	0.000803209	0.0353433	1.80619	0.00585134	0.132566
YPK_4093	YPK_4093	NC_010930	complement(4523439..4524323)	5,10-methylenetetrahydrofolate reductase	-1.12802	0.0379066	0.3824	-1.02786	0.0111699	0.196231
YPK_4098	YPK_4098	NC_010931	complement(4530178..4530393)	50S ribosomal protein L31	5.63043	0.0142137	0.229171	NA	NA	NA
YPK_4107	YPK_4107	NC_010932	complement(4539058..4539642)	hypothetical protein	-1.33153	0.0443895	0.409779	-1.13423	0.0197268	0.287479
YPK_4109	YPK_4109	NC_010933	4540724..4542016	secretion protein HlyD family protein	NA	NA	NA	-0.990821	0.0270844	0.342353
YPK_4111	YPK_4111	NC_010934	complement(4544464..4544703)	hypothetical protein	1.92706	0.00535616	0.119819	1.28245	0.0376857	0.392575
YPK_4118	YPK_4118	NC_010935	4551843..4552610	triosephosphate isomerase	1.214	0.0195433	0.271806	1.06626	0.00955694	0.181757
YPK_4123	YPK_4123	NC_010936	4557257..4558033	extracellular solute-binding protein	-1.34652	0.0441501	0.409779	-1.15717	0.0160641	0.254459
YPK_4149	YPK_4149	NC_010937	4582268..4583587	3-deoxy-D-manno-octulosonic-acid transferase	NA	NA	NA	-0.860202	0.0255076	0.332561
YPK_4152	YPK_4152	NC_010938	complement(4584852..4585661)	formamidopyrimidine-DNA glycosylase	-1.3448	0.0318077	0.346605	-1.1123	0.0300054	0.361955
YPK_4162	YPK_4162	NC_010939	4592498..4593766	integrase family protein	1.39334	0.0283618	0.328901	1.13488	0.0242408	0.323158
YPK_4165	YPK_4165	NC_010940	4594966..4595385	hypothetical protein	3.50762	0.0320951	0.348838	NA	NA	NA
YPK_4181	YPK_4181	NC_010941	complement(4610943..4612157)	sodium/glutamate symporter	1.54506	0.00503809	0.114522	1.32978	0.00252861	0.0765372
YPK_4185	YPK_4185	NC_010942	complement(4616879..4617316)	D-tyrosyl-tRNA(Tyr) deacylase	-1.46312	0.0316261	0.346413	-1.24908	0.0102167	0.188946
YPK_4201	YPK_4201	NC_010943	complement(4636325..4637533)	transposase mutator type	-3.49204	1.62e-06	0.000204989	NA	NA	NA
YPK_4215	YPK_4215	NC_010944	4654158..4654619	DNA-binding transcriptional regulator AsnC	-1.5235	0.0391804	0.389776	-1.26231	0.0139788	0.230561
YPK_4222	YPK_4222	NC_010945	4660468..4660938	F0F1 ATP synthase subunit B	2.1819	0.000595436	0.028608	1.80423	0.0002496	0.0149977
YPK_4225	YPK_4225	NC_010946	4663104..4663967	F0F1 ATP synthase subunit gamma	2.30065	1.46e-05	0.00146931	2.04129	4.07e-07	8.43e-05
YPK_4226	YPK_4226	NC_010947	4664123..4665505	F0F1 ATP synthase subunit beta	1.5202	0.00158832	0.0578917	1.38415	0.000123892	0.00987804
YPK_4228	YPK_4228	NC_010948	4666570..4667940	bifunctional N-acetylglucosamine-1-phosphateuridyltransferase/glucosamine-1-phosphateacetyltransferase	NA	NA	NA	0.763837	0.0494548	0.436697
YPK_4236	YPK_4236	NC_010949	4675524..4676195	hypothetical protein	-1.17541	0.0283674	0.328901	-1.05327	0.0128675	0.21775
YPK_4239	YPK_4239	NC_010950	4678179..4678934	polar amino acid ABC transporter inner membranesubunit	NA	NA	NA	-0.968766	0.0346145	0.378474
YPK_4242	YPK_4242	NC_010951	4682003..4682623	hypothetical protein	-1.94704	0.0380772	0.3824	-1.30729	0.0358758	0.382368
YPK_RS00640	YPK_RS00640	NC_010952	complement(159480..159749)	hypothetical protein	4.80982	0.0421896	0.399055	NA	NA	NA
YPK_RS01735	YPK_RS01735	NC_010953	complement(374135..374251)	hypothetical protein	-4.6884	0.020459	0.279357	NA	NA	NA
YPK_RS02665	YPK_RS02665	NC_010954	587246..587440	hypothetical protein	2.98111	0.0347172	0.36696	NA	NA	NA
YPK_RS03700	YPK_RS03700	NC_010955	complement(792553..792855)	membrane protein	-2.58195	0.0099677	0.183849	-1.7064	0.00650798	0.142011
YPK_RS04840	YPK_RS04840	NC_010956	complement(1078524..1078952)	hypothetical protein	NA	NA	NA	-1.09229	0.0320653	0.368826
YPK_RS05040	YPK_RS05040	NC_010957	1129784..1130185	general secretion pathway protein C	-2.29333	0.00262733	0.0804952	-1.81366	0.000833405	0.0358937
YPK_RS05540	YPK_RS05540	NC_010958	complement(1236062..1236247)	hypothetical protein	1.47608	0.0148454	0.229199	1.2316	0.0103799	0.189677
YPK_RS05760	YPK_RS05760	NC_010959	1279162..1279395	hypothetical protein	-2.66254	0.0445879	0.41019	NA	NA	NA
YPK_RS06040	YPK_RS06040	NC_010960	complement(1329491..1329751)	ferredoxin	-3.87317	0.00306983	0.088559	-2.03002	0.00200781	0.0643739
YPK_RS06175	YPK_RS06175	NC_010961	complement(1349686..1349946)	hypothetical protein	7.03703	0.000475283	0.0239226	1.91667	0.00357546	0.0950247
YPK_RS08385	YPK_RS08385	NC_010962	1848604..1848837	lipoprotein	-2.99061	0.0357885	0.371595	-1.42733	0.0307079	0.363757
YPK_RS08715	YPK_RS08715	NC_010963	1917765..1917932	hypothetical protein	-3.07973	0.043455	0.406477	NA	NA	NA
YPK_RS09760	YPK_RS09760	NC_010964	2153522..2153725	hypothetical protein	-3.99045	0.0145467	0.229171	NA	NA	NA
YPK_RS11195	YPK_RS11195	NC_010965	complement(2481276..2481986)	acetyltransferase	NA	NA	NA	-1.12627	0.040078	0.40331
YPK_RS12170	YPK_RS12170	NC_010966	complement(2668447..2668677)	hypothetical protein	5.6089	0.0145202	0.229171	NA	NA	NA
YPK_RS13325	YPK_RS13325	NC_010967	2928667..2928864	hypothetical protein	3.12193	0.0240413	0.306165	1.30766	0.0473575	0.428328
YPK_RS14000	YPK_RS14000	NC_010968	3090495..3090878	hypothetical protein	6.44265	0.00320716	0.0892235	1.40835	0.0269855	0.342146
YPK_RS16815	YPK_RS16815	NC_010969	3673566..3673751	hypothetical protein	1.26986	0.00964684	0.180733	1.09275	0.0146688	0.239436
YPK_RS19035	YPK_RS19035	NC_010970	complement(4171721..4172038)	primosomal replication protein N	2.01627	0.00459942	0.111501	NA	NA	NA
YPK_RS19560	YPK_RS19560	NC_010971	complement(4288592..4288885)	hypothetical protein	3.25015	0.0020392	0.0693129	1.88079	0.00356596	0.0950247
insD1		pIBX1	20951..21517	Insertion element IS407 uncharacterized 31.7 kDa protein	1.61174	0.00405348	0.103867	1.36209	0.00355105	0.0950247
lcrD		pIBX1	complement(44042..46156)	Low calcium response locus protein D	1.44934	0.00318391	0.0892235	1.25882	0.00373625	0.0986655
lcrG		pIBX1	complement(43276..43563)	Low calcium response locus protein G	3.2185	2.38e-08	5.29e-06	NA	NA	NA
lcrH		pIBX1	complement(41775..42281)	Low calcium response locus protein H	3.25492	1.12e-09	4.72e-07	2.82245	1.66e-10	1.15e-07
lcrR		pIBX1	complement(43605..44051)	Low calcium response locus protein R	1.21209	0.0262431	0.322892	NA	NA	NA
lcrS		pIBX1	65939..66205	Low calcium response locus protein S	1.48671	0.0308747	0.341314	1.1463	0.0371497	0.390152
lcrT		pIBX1	16210..16590	Low calcium response locus protein T	NA	NA	NA	1.1796	0.0425955	0.415532
lcrV		pIBX1	complement(42294..43274)	Virulence-associated V antigen	1.94547	9.77e-05	0.00655516	1.70037	7.66e-05	0.00661372
parD		pIBX1	complement(26764..27039)	Antitoxin ParD	3.30972	3.22e-09	9.71e-07	2.70821	8.34e-08	2.3e-05
piBX005		pIBX1	3875..4000	Hypothetical Protein piBX005	4.94807	0.0355888	0.370614	NA	NA	NA
piBX008		pIBX1	complement(7411..7860)	Hypothetical _p	2.20213	4.94e-05	0.00379437	1.8967	2.4e-05	0.00261561
piBX030		pIBX1	complement(21909..22334)	YopH Chaperone SycH	1.17937	0.032562	0.350626	0.982226	0.0427455	0.416017
piBX037		pIBX1	26334..26630	Hypothetical	2.47378	1.14e-05	0.00117587	2.01448	6.94e-05	0.00639088
parE		pIBX1	complement(26472..26771)	Plasmid Stabilization System parE	3.78439	7.52e-11	3.98e-08	3.1809	1.41e-11	1.95e-08
piBX041		pIBX1	complement(27871..28164)	Hypothetical Protein PYV	6.18422	0.0053977	0.120113	1.32296	0.0362634	0.384522
piBX051		pIBX1	35039..35458	Hypothetical	1.22907	0.0247977	0.312846	1.07085	0.0123307	0.212129
piBX058		pIBX1	complement(38166..38315)	Hypothetical Protein piBX058	-2.8354	0.0380366	0.3824	NA	NA	NA
piBX084		pIBX1	55924..56346	Lipoprotein Virg	1.74596	0.00631843	0.134921	1.45052	0.00294903	0.0849074
repA		pIBX1	complement(10018..10896)	Replication initiation protein	1.97704	0.00320766	0.0892235	1.62584	0.00107924	0.0434419
sopA		pIBX1	complement(29274..30515)	Protein sopA	0.930174	0.0492698	0.435852	0.844424	0.0171821	0.265146
sycN		pIBX1	complement(46849..47220)	Chaperone protein sycN	2.27094	4.21e-05	0.00329327	1.82706	0.000474046	0.0234715
tnpA_1		pIBX1		Transposon gamma-delta resolvase	1.37185	0.00493077	0.114522	1.25097	0.000373613	0.0201169
tnpR		pIBX1	18981..19616		4.02431	5.62e-12	9.03e-09	3.06315	3.66e-08	1.2e-05
tyeA		pIBX1	complement(47207..47485)	Protein tyeA	2.71865	1.37e-07	2.51e-05	2.40757	5.6e-09	2.9e-06
yadA		pIBX1	complement(14299..15612)	Adhesin yadA	4.4542	2.29e-13	9.7e-10	2.60397	5.1e-05	0.0049128
yerA		pIBX1	complement(25087..25479)	YopE regulator	1.72557	0.0012152	0.04834	1.50178	0.000547556	0.0257974
yopB		pIBX1	complement(40592..41797)	Protein yopB	3.23883	2.99e-09	9.71e-07	2.66056	1.01e-07	2.63e-05
yopD		pIBX1	complement(39653..40573)	Protein yopD	2.99754	6.12e-08	1.23e-05	2.20658	0.000131982	0.0101333
yopE		pIBX1	25673..26332	Outer membrane virulence protein yopE	3.07384	8.53e-09	2.12e-06	2.60796	2.38e-08	9.88e-06
yopH		pIBX1	complement(855..2285)	Tyrosine-protein phosphatase yopH	2.58959	1.34e-06	0.000183383	2.01276	0.000222438	0.0137646
yopN		pIBX1	complement(47466..48422)	Outer membrane protein yopN	2.78197	2.01e-07	3.4e-05	2.28285	5.68e-06	0.000811848
ypkA		pIBX1	complement(5205..7403)	Protein kinase ypkA	2.38636	4.78e-06	0.000561858	1.96974	7.17e-05	0.00646554
yscB		pIBX1	57688..58101	Chaperone protein yscB	3.44028	0.000566901	0.0275501	2.09143	0.000958008	0.0401202
yscC		pIBX1	58092..59930	Yop proteins translocation protein C	2.36602	3.4e-06	0.000410184	2.05954	2.36e-06	0.000391078
yscD		pIBX1	59927..61186	Yop proteins translocation protein D	1.40784	0.00435187	0.108874	1.20801	0.00747158	0.158857
yscE		pIBX1	61183..61383	Putative Yop proteins translocation protein E	4.39582	6.4e-12	9.03e-09	3.43374	7.2e-11	5.97e-08
yscF		pIBX1	61384..61647	Yop proteins translocation protein F	3.90814	2.56e-11	2.16e-08	3.27856	5.01e-12	1.95e-08
yscG		pIBX1	61649..61996	Putative Yop proteins translocation protein G	3.89811	6.25e-11	3.77e-08	1.8406	0.00533467	0.124958
yscH		pIBX1	61993..62490	Yop proteins translocation protein H	2.63787	4.32e-07	6.77e-05	2.26987	5.07e-07	0.000100151
yscI		pIBX1	62491..62838	Yop proteins translocation protein I	2.45193	2.8e-05	0.00247002	NA	NA	NA
yscJ		pIBX1	62845..63579	Yop proteins translocation lipoprotein J	3.13409	4.91e-09	1.39e-06	2.7146	8.03e-10	4.76e-07
yscK		pIBX1	63558..64208	Yop proteins translocation protein K	3.13023	9.26e-07	0.000139824	2.53369	6.3e-07	0.000113564
yscL		pIBX1	64154..64819	Yop proteins translocation protein L	2.64407	1.59e-06	0.000204989	2.16077	2.07e-05	0.00245265
yscM		pIBX1	65044..65391	Yop proteins translocation protein M	4.47923	1.11e-06	0.000162418	3.0096	3.62e-07	7.89e-05
yscN		pIBX1	48544..49863	Probable ATP synthase YscN	2.73225	1.82e-07	3.21e-05	2.34805	2.22e-07	5.12e-05
yscO		pIBX1	49860..50324	Yop proteins translocation protein O	2.32103	2.28e-05	0.00205033	1.90782	0.000137554	0.0103691
yscP		pIBX1	50324..51691	Yop proteins translocation protein P	2.28423	7.76e-06	0.000840761	1.97122	1.09e-05	0.00140763
yscQ		pIBX1	51688..52611	Yop proteins translocation protein Q	1.49209	0.00238598	0.076994	1.33069	0.000839772	0.0358937
yscT		pIBX1	53526..54311	Yop proteins translocation protein T	1.08681	0.0329248	0.35242	NA	NA	NA
yscU		pIBX1	54311..55375	Yop proteins translocation protein U	NA	NA	NA	0.801332	0.0357604	0.38212
yscX		pIBX1	complement(46484..46852)	Yop proteins translocation protein X	1.887	0.001938	0.0671628	1.5455	0.00197661	0.0643739
yscY		pIBX1	complement(46143..46487)	Chaperone protein yscY	3.52949	3.54e-05	0.00287771	2.30301	0.000201312	0.0132482
