# Supplementary material for: 6S RNA facilitates bacterial virulence and adaptation at the epithelial barrier
Source: Research Square preprint supplement (doi:10.21203/rs.3.rs-7847320/v1), 2025-11-19
Supplement: Supplementary file 2 [file 39e81c6e2ee374f5f1db51c2.xlsx]

## Sheet: InvivoDE_Cuttoff_SigBS_KemalInv
Supplementary Table 4. Predicted sigma factor binding sites in differentially regulated Y. pseudotuberculosis genes localized in tissue and lumen.
Gene	Name	Description	GeneStart	GeneStOPeron	Strand	GeneType	UTRup	UTRdown	MotifStart	Score	SigmaFactor	Details
YPK_0011	YPK_0011	heat shock protein IbpA with IbpB associates with aggregated proteins to stabilize and protect them from irreversible denaturation and extensive proteolysis during heat shock and oxidative stress	11970	12383	+	TSS	11357	11857	11772	1.98	rpoE	promoter=rpoE;box35pos=383;box35seq=taagtg;box10pos=404;box10seq=tcgaa
YPK_0011	YPK_0011	heat shock protein IbpA with IbpB associates with aggregated proteins to stabilize and protect them from irreversible denaturation and extensive proteolysis during heat shock and oxidative stress	11970	12383	+	TSS	11357	11857	11802	1.94	rpoS	promoter=rpoS;box35pos=411;box35seq=tttacc;box10pos=432;box10seq=tacgat
YPK_0011	YPK_0011	heat shock protein IbpA with IbpB associates with aggregated proteins to stabilize and protect them from irreversible denaturation and extensive proteolysis during heat shock and oxidative stress	11970	12383	+	TSS	11357	11857	11790	1.94	rpoD	promoter=rpoD;box35pos=399;box35seq=tttcat;box10pos=422;box10seq=tatttt
YPK_0015	YPK_0015	hypothetical protein KEGG: yps:YPTB3908 hypothetical protein	16993	17436	-	SGene	17436	17936	18196	1.96	rpoS	promoter=rpoS;box35pos=198;box35seq=gttccg;box10pos=226;box10seq=tacaga
YPK_0015	YPK_0015	hypothetical protein KEGG: yps:YPTB3908 hypothetical protein	16993	17436	-	SGene	17436	17936	18220	1.96	rpoD	promoter=rpoD;box35pos=180;box35seq=tagata;box10pos=204;box10seq=tatttt
YPK_0045	YPK_0045	hypothetical protein KEGG: yps:YPTB3935 hypothetical protein	50488	51036	-	OPeron	51209	51709	51774	1.95	rpoS	promoter=rpoS;box35pos=401;box35seq=cttgag;box10pos=422;box10seq=aaaact
YPK_0045	YPK_0045	hypothetical protein KEGG: yps:YPTB3935 hypothetical protein	50488	51036	-	OPeron	51209	51709	51785	1.93	rpoD	promoter=rpoD;box35pos=390;box35seq=tttaat;box10pos=412;box10seq=tagcgt
YPK_0061	YPK_0061	integrase family protein PFAM: integrase family protein~KEGG: plu:plu0125 hypothetical protein	69706	70896	+	SGene	69206	69706	69639	1.94	rpoE	promoter=rpoE;box35pos=400;box35seq=taatta;box10pos=422;box10seq=actgt
YPK_0061	YPK_0061	integrase family protein PFAM: integrase family protein~KEGG: plu:plu0125 hypothetical protein	69706	70896	+	SGene	69206	69706	69417	1.96	rpoS	promoter=rpoS;box35pos=174;box35seq=ctgcta;box10pos=198;box10seq=tacaat
YPK_0061	YPK_0061	integrase family protein PFAM: integrase family protein~KEGG: plu:plu0125 hypothetical protein	69706	70896	+	SGene	69206	69706	69597	1.97	rpoD	promoter=rpoD;box35pos=356;box35seq=tccact;box10pos=379;box10seq=tataat
YPK_0067	YPK_0067	Integrase catalytic subunit PFAM: Integrase catalytic region~KEGG: yps:pYV0019 putative transposase	75893	76648	+	OPeron	75049	75549	75390	1.98	rpoE	promoter=rpoE;box35pos=310;box35seq=acatta;box10pos=330;box10seq=tcata
YPK_0067	YPK_0067	Integrase catalytic subunit PFAM: Integrase catalytic region~KEGG: yps:pYV0019 putative transposase	75893	76648	+	OPeron	75049	75549	75387	1.96	rpoS	promoter=rpoS;box35pos=300;box35seq=tttact;box10pos=325;box10seq=taacat
YPK_0067	YPK_0067	Integrase catalytic subunit PFAM: Integrase catalytic region~KEGG: yps:pYV0019 putative transposase	75893	76648	+	OPeron	75049	75549	75370	1.96	rpoD	promoter=rpoD;box35pos=284;box35seq=tagtca;box10pos=309;box10seq=tacatt
YPK_0108	YPK_0108	hypothetical protein KEGG: yps:YPTB3823 hypothetical protein	130167	131036	+	OPeron	129667	130167	130028	1.95	rpoE	promoter=rpoE;box35pos=327;box35seq=gaaata;box10pos=350;box10seq=gcaaa
YPK_0108	YPK_0108	hypothetical protein KEGG: yps:YPTB3823 hypothetical protein	130167	131036	+	OPeron	129667	130167	130052	1.91	rpoS	promoter=rpoS;box35pos=344;box35seq=ttgatg;box10pos=372;box10seq=taattt
YPK_0108	YPK_0108	hypothetical protein KEGG: yps:YPTB3823 hypothetical protein	130167	131036	+	OPeron	129667	130167	130051	1.97	rpoD	promoter=rpoD;box35pos=344;box35seq=ttgatg;box10pos=372;box10seq=taattt
YPK_0128	YPK_0128	hypothetical protein PFAM: protein of unknown function DUF1498~KEGG: ypi:YpsIP31758_4027 hypothetical protein	156082	156765	+	OPeron	155582	156082	155997	1.91	rpoD	promoter=rpoD;box35pos=380;box35seq=tcgaca;box10pos=403;box10seq=tacaaa
YPK_0151	YPK_0151	glycogen/starch/alpha-glucan phosphorylase KEGG: yps:YPTB3783 glycogen phosphorylase~TIGRFAM: glycogen/starch/alpha-glucan phosphorylase~PFAM: glycosyl transferase family 35	196560	199007	+	SGene	196060	196560	196266	1.91	rpoD	promoter=rpoD;box35pos=172;box35seq=tttatc;box10pos=194;box10seq=gaaact
YPK_0168	feoB	ferrous iron transport protein B cytOPeronlasmic membrane ferrous uptake system permease; mutations disrupt the ability of Escherichia coli to take up ferrous iron; GTP-binding protein which requires GTP for efficient iron(II) uptake	216542	218857	-	OPeron	219176	219676	219758	1.97	rpoE	promoter=rpoE;box35pos=383;box35seq=gaatgc;box10pos=407;box10seq=actaa
YPK_0168	feoB	ferrous iron transport protein B cytOPeronlasmic membrane ferrous uptake system permease; mutations disrupt the ability of Escherichia coli to take up ferrous iron; GTP-binding protein which requires GTP for efficient iron(II) uptake	216542	218857	-	OPeron	219176	219676	219773	1.95	rpoS	promoter=rpoS;box35pos=368;box35seq=tttaat;box10pos=389;box10seq=tatcgt
YPK_0168	feoB	ferrous iron transport protein B cytOPeronlasmic membrane ferrous uptake system permease; mutations disrupt the ability of Escherichia coli to take up ferrous iron; GTP-binding protein which requires GTP for efficient iron(II) uptake	216542	218857	-	OPeron	219176	219676	219749	1.96	rpoD	promoter=rpoD;box35pos=391;box35seq=tcgtaa;box10pos=415;box10seq=gaatat
YPK_0174	YPK_0174	phosphoenolpyruvate carboxykinase PEP carboxykinase; PEP carboxylase; PEPCK; catalyzes the phosphorylation and decarboxylation of oxaloacetate to form phosphoenolpyruvate using ATP	225667	227286	-	TSS	227314	227814	228064	1.92	rpoD	promoter=rpoD;box35pos=214;box35seq=tagcaa;box10pos=238;box10seq=gataat
YPK_0181	YPK_0181	D12 class N6 adenine-specific DNA methyltransferase PFAM: D12 class N6 adenine-specific DNA methyltransferase~KEGG: cvi:CV_2111 probable methyltransferase	233187	233942	-	SGene	233942	234442	234600	1.94	rpoS	promoter=rpoS;box35pos=307;box35seq=tttgag;box10pos=329;box10seq=aaccct
YPK_0181	YPK_0181	D12 class N6 adenine-specific DNA methyltransferase PFAM: D12 class N6 adenine-specific DNA methyltransferase~KEGG: cvi:CV_2111 probable methyltransferase	233187	233942	-	SGene	233942	234442	234521	1.96	rpoD	promoter=rpoD;box35pos=381;box35seq=cccaca;box10pos=409;box10seq=taacat
YPK_0199	YPK_0199	putative endolysin KEGG: ecv:APECO1_4061 putative endolysin	245621	246259	-	OPeron	255296	255796	256047	1.96	rpoE	promoter=rpoE;box35pos=219;box35seq=gctgaa;box10pos=238;box10seq=tcaaa
YPK_0199	YPK_0199	putative endolysin KEGG: ecv:APECO1_4061 putative endolysin	245621	246259	-	OPeron	255296	255796	256089	1.95	rpoS	promoter=rpoS;box35pos=166;box35seq=gttaaa;box10pos=194;box10seq=taaagt
YPK_0199	YPK_0199	putative endolysin KEGG: ecv:APECO1_4061 putative endolysin	245621	246259	-	OPeron	255296	255796	256090	1.96	rpoD	promoter=rpoD;box35pos=166;box35seq=gttaaa;box10pos=194;box10seq=taaagt
YPK_0201	YPK_0201	hypothetical protein KEGG: bvi:Bcep1808_1315 hypothetical protein	246632	247069	-	TSS	247143	247643	247830	1.97	rpoD	promoter=rpoD;box35pos=276;box35seq=gctaaa;box10pos=301;box10seq=taagct
YPK_0205	YPK_0205	hypothetical protein	248303	248512	-	OPeron	255296	255796	256047	1.96	rpoE	promoter=rpoE;box35pos=219;box35seq=gctgaa;box10pos=238;box10seq=tcaaa
YPK_0205	YPK_0205	hypothetical protein	248303	248512	-	OPeron	255296	255796	256089	1.95	rpoS	promoter=rpoS;box35pos=166;box35seq=gttaaa;box10pos=194;box10seq=taaagt
YPK_0205	YPK_0205	hypothetical protein	248303	248512	-	OPeron	255296	255796	256090	1.96	rpoD	promoter=rpoD;box35pos=166;box35seq=gttaaa;box10pos=194;box10seq=taaagt
YPK_0209	YPK_0209	hypothetical protein	249501	250001	-	OPeron	255296	255796	256047	1.96	rpoE	promoter=rpoE;box35pos=219;box35seq=gctgaa;box10pos=238;box10seq=tcaaa
YPK_0209	YPK_0209	hypothetical protein	249501	250001	-	OPeron	255296	255796	256089	1.95	rpoS	promoter=rpoS;box35pos=166;box35seq=gttaaa;box10pos=194;box10seq=taaagt
YPK_0209	YPK_0209	hypothetical protein	249501	250001	-	OPeron	255296	255796	256090	1.96	rpoD	promoter=rpoD;box35pos=166;box35seq=gttaaa;box10pos=194;box10seq=taaagt
YPK_0212	YPK_0212	hypothetical protein KEGG: hdu:HD0097 hypothetical protein	250975	251613	-	OPeron	255296	255796	256047	1.96	rpoE	promoter=rpoE;box35pos=219;box35seq=gctgaa;box10pos=238;box10seq=tcaaa
YPK_0212	YPK_0212	hypothetical protein KEGG: hdu:HD0097 hypothetical protein	250975	251613	-	OPeron	255296	255796	256089	1.95	rpoS	promoter=rpoS;box35pos=166;box35seq=gttaaa;box10pos=194;box10seq=taaagt
YPK_0212	YPK_0212	hypothetical protein KEGG: hdu:HD0097 hypothetical protein	250975	251613	-	OPeron	255296	255796	256090	1.96	rpoD	promoter=rpoD;box35pos=166;box35seq=gttaaa;box10pos=194;box10seq=taaagt
YPK_0252	YPK_0252	hypothetical protein KEGG: eca:ECA3675 hypothetical protein	293418	294290	+	OPeron	292918	293418	293231	1.95	rpoS	promoter=rpoS;box35pos=277;box35seq=ttgatg;box10pos=300;box10seq=cattct
YPK_0252	YPK_0252	hypothetical protein KEGG: eca:ECA3675 hypothetical protein	293418	294290	+	OPeron	292918	293418	293242	1.96	rpoD	promoter=rpoD;box35pos=284;box35seq=ttcatc;box10pos=312;box10seq=gataat
YPK_0267	YPK_0267	hypothetical protein PFAM: conserved hypothetical protein~KEGG: ypm:YP_0190 predicted nucleic-acid-binding protein containing a Zn-ribbon domain	308325	308546	+	OPeron	305449	305949	305783	1.94	rpoE	promoter=rpoE;box35pos=300;box35seq=gaagtt;box10pos=323;box10seq=tcact
YPK_0267	YPK_0267	hypothetical protein PFAM: conserved hypothetical protein~KEGG: ypm:YP_0190 predicted nucleic-acid-binding protein containing a Zn-ribbon domain	308325	308546	+	OPeron	305449	305949	305738	1.93	rpoS	promoter=rpoS;box35pos=254;box35seq=gtgccg;box10pos=276;box10seq=taaatt
YPK_0267	YPK_0267	hypothetical protein PFAM: conserved hypothetical protein~KEGG: ypm:YP_0190 predicted nucleic-acid-binding protein containing a Zn-ribbon domain	308325	308546	+	OPeron	305449	305949	305712	1.94	rpoD	promoter=rpoD;box35pos=227;box35seq=ttgaag;box10pos=250;box10seq=tagagt
YPK_0268	YPK_0268	FKBP-type peptidyl-prolyl cis-trans isomerase rotamase	308641	309222	+	TSS	308113	308613	308358	1.92	rpoE	promoter=rpoE;box35pos=215;box35seq=gactat;box10pos=234;box10seq=acagt
YPK_0268	YPK_0268	FKBP-type peptidyl-prolyl cis-trans isomerase rotamase	308641	309222	+	TSS	308113	308613	308352	1.96	rpoD	promoter=rpoD;box35pos=199;box35seq=gtcgag;box10pos=227;box10seq=taataa
YPK_0270	YPK_0270	FKBP-type peptidyl-prolyl cis-trans isomerase rotamase	309956	310756	+	TSS	309344	309844	309731	1.95	rpoS	promoter=rpoS;box35pos=346;box35seq=ctgcaa;box10pos=374;box10seq=tacggt
YPK_0270	YPK_0270	FKBP-type peptidyl-prolyl cis-trans isomerase rotamase	309956	310756	+	TSS	309344	309844	309694	1.94	rpoD	promoter=rpoD;box35pos=316;box35seq=ctgcaa;box10pos=338;box10seq=taatat
YPK_0275	rpsL	30S ribosomal protein S12 interacts with and stabilizes bases of the 16S rRNA that are involved in tRNA selection in the A site and with the mRNA backbone; located at the interface of the 30S and 50S subunits, it traverses the body of the 30S subunit contacting proteins on the oth	312937	313311	+	TSS	312258	312758	312651	1.93	rpoS	promoter=rpoS;box35pos=354;box35seq=gtgata;box10pos=380;box10seq=aattct
YPK_0275	rpsL	30S ribosomal protein S12 interacts with and stabilizes bases of the 16S rRNA that are involved in tRNA selection in the A site and with the mRNA backbone; located at the interface of the 30S and 50S subunits, it traverses the body of the 30S subunit contacting proteins on the oth	312937	313311	+	TSS	312258	312758	312517	1.93	rpoD	promoter=rpoD;box35pos=224;box35seq=ctgact;box10pos=247;box10seq=tattca
YPK_0278	YPK_0278	elongation factor Tu EF-Tu; promotes GTP-dependent binding of aminoacyl-tRNA to the A-site of ribosomes during protein biosynthesis; when the tRNA anticodon matches the mRNA codon, GTP hydrolysis results; the inactive EF-Tu-GDP leaves the ribosome and release of GDP is promot	316152	317336	+	TSS	315473	315973	315803	1.9	rpoS	promoter=rpoS;box35pos=294;box35seq=tttaaa;box10pos=317;box10seq=taaacc
YPK_0278	YPK_0278	elongation factor Tu EF-Tu; promotes GTP-dependent binding of aminoacyl-tRNA to the A-site of ribosomes during protein biosynthesis; when the tRNA anticodon matches the mRNA codon, GTP hydrolysis results; the inactive EF-Tu-GDP leaves the ribosome and release of GDP is promot	316152	317336	+	TSS	315473	315973	315851	1.96	rpoD	promoter=rpoD;box35pos=341;box35seq=catgaa;box10pos=366;box10seq=gaagat
YPK_0279	YPK_0279	transposase IS200-family protein PFAM: transposase IS200-family protein~KEGG: ypi:YpsIP31758_3905 IS1541, transposase	317539	317997	+	SGene	317039	317539	317440	1.92	rpoE	promoter=rpoE;box35pos=367;box35seq=aaaccc;box10pos=390;box10seq=tcagt
YPK_0279	YPK_0279	transposase IS200-family protein PFAM: transposase IS200-family protein~KEGG: ypi:YpsIP31758_3905 IS1541, transposase	317539	317997	+	SGene	317039	317539	317430	1.95	rpoS	promoter=rpoS;box35pos=352;box35seq=tttatt;box10pos=378;box10seq=taggct
YPK_0279	YPK_0279	transposase IS200-family protein PFAM: transposase IS200-family protein~KEGG: ypi:YpsIP31758_3905 IS1541, transposase	317539	317997	+	SGene	317039	317539	317368	1.93	rpoD	promoter=rpoD;box35pos=294;box35seq=cttaat;box10pos=317;box10seq=tattga
YPK_0280	YPK_0280	bacterioferritin-associated ferredoxin PFAM: BFD domain protein [2Fe-2S]-binding domain protein~KEGG: yps:YPTB3701 putative bacterioferritin-associated ferredoxin	318185	318379	+	TSS	317661	318161	317891	1.91	rpoS	promoter=rpoS;box35pos=193;box35seq=ttggtg;box10pos=217;box10seq=tacggt
YPK_0280	YPK_0280	bacterioferritin-associated ferredoxin PFAM: BFD domain protein [2Fe-2S]-binding domain protein~KEGG: yps:YPTB3701 putative bacterioferritin-associated ferredoxin	318185	318379	+	TSS	317661	318161	317950	1.91	rpoD	promoter=rpoD;box35pos=251;box35seq=tacata;box10pos=277;box10seq=taaaat
YPK_0282	YPK_0282	30S ribosomal protein S10 PFAM: ribosomal protein S10~KEGG: asu:Asuc_0458 ribosomal protein S10	319345	319656	+	TSS	318668	319168	319079	1.94	rpoE	promoter=rpoE;box35pos=376;box35seq=tctttc;box10pos=400;box10seq=tcagt
YPK_0282	YPK_0282	30S ribosomal protein S10 PFAM: ribosomal protein S10~KEGG: asu:Asuc_0458 ribosomal protein S10	319345	319656	+	TSS	318668	319168	319118	1.95	rpoS	promoter=rpoS;box35pos=418;box35seq=cttcaa;box10pos=439;box10seq=aattct
YPK_0282	YPK_0282	30S ribosomal protein S10 PFAM: ribosomal protein S10~KEGG: asu:Asuc_0458 ribosomal protein S10	319345	319656	+	TSS	318668	319168	319117	1.96	rpoD	promoter=rpoD;box35pos=412;box35seq=ttcccc;box10pos=437;box10seq=caaatt
YPK_0283	rplC	50S ribosomal protein L3 binds directly near the 3' end of the 23S rRNA, where it nucleates assembly of the 50S subunit; essential for peptidyltransferase activity; mutations in this gene confer resistance to tiamulin	319689	320318	+	OPeron	318845	319345	319295	1.95	rpoE	promoter=rpoE;box35pos=420;box35seq=gaacga;box10pos=439;box10seq=tcaat
YPK_0283	rplC	50S ribosomal protein L3 binds directly near the 3' end of the 23S rRNA, where it nucleates assembly of the 50S subunit; essential for peptidyltransferase activity; mutations in this gene confer resistance to tiamulin	319689	320318	+	OPeron	318845	319345	319189	1.96	rpoS	promoter=rpoS;box35pos=306;box35seq=tttacg;box10pos=331;box10seq=taatct
YPK_0283	rplC	50S ribosomal protein L3 binds directly near the 3' end of the 23S rRNA, where it nucleates assembly of the 50S subunit; essential for peptidyltransferase activity; mutations in this gene confer resistance to tiamulin	319689	320318	+	OPeron	318845	319345	319117	1.96	rpoD	promoter=rpoD;box35pos=235;box35seq=ttcccc;box10pos=260;box10seq=caaatt
YPK_0284	rplD	50S ribosomal protein L4 L4 is important during the early stages of 50S assembly; it initially binds near the 5' end of the 23S rRNA	320335	320940	+	OPeron	318845	319345	319295	1.95	rpoE	promoter=rpoE;box35pos=420;box35seq=gaacga;box10pos=439;box10seq=tcaat
YPK_0284	rplD	50S ribosomal protein L4 L4 is important during the early stages of 50S assembly; it initially binds near the 5' end of the 23S rRNA	320335	320940	+	OPeron	318845	319345	319189	1.96	rpoS	promoter=rpoS;box35pos=306;box35seq=tttacg;box10pos=331;box10seq=taatct
YPK_0284	rplD	50S ribosomal protein L4 L4 is important during the early stages of 50S assembly; it initially binds near the 5' end of the 23S rRNA	320335	320940	+	OPeron	318845	319345	319117	1.96	rpoD	promoter=rpoD;box35pos=235;box35seq=ttcccc;box10pos=260;box10seq=caaatt
YPK_0285	rplW	50S ribosomal protein L23 binds third domain of 23S rRNA and protein L29; part of exit tunnel	320937	321239	+	OPeron	318845	319345	319295	1.95	rpoE	promoter=rpoE;box35pos=420;box35seq=gaacga;box10pos=439;box10seq=tcaat
YPK_0285	rplW	50S ribosomal protein L23 binds third domain of 23S rRNA and protein L29; part of exit tunnel	320937	321239	+	OPeron	318845	319345	319189	1.96	rpoS	promoter=rpoS;box35pos=306;box35seq=tttacg;box10pos=331;box10seq=taatct
YPK_0285	rplW	50S ribosomal protein L23 binds third domain of 23S rRNA and protein L29; part of exit tunnel	320937	321239	+	OPeron	318845	319345	319117	1.96	rpoD	promoter=rpoD;box35pos=235;box35seq=ttcccc;box10pos=260;box10seq=caaatt
YPK_0287	rpsS	30S ribosomal protein S19 protein S19 forms a complex with S13 that binds strongly to the 16S ribosomal RNA	322095	322373	+	OPeron	318845	319345	319295	1.95	rpoE	promoter=rpoE;box35pos=420;box35seq=gaacga;box10pos=439;box10seq=tcaat
YPK_0287	rpsS	30S ribosomal protein S19 protein S19 forms a complex with S13 that binds strongly to the 16S ribosomal RNA	322095	322373	+	OPeron	318845	319345	319189	1.96	rpoS	promoter=rpoS;box35pos=306;box35seq=tttacg;box10pos=331;box10seq=taatct
YPK_0287	rpsS	30S ribosomal protein S19 protein S19 forms a complex with S13 that binds strongly to the 16S ribosomal RNA	322095	322373	+	OPeron	318845	319345	319117	1.96	rpoD	promoter=rpoD;box35pos=235;box35seq=ttcccc;box10pos=260;box10seq=caaatt
YPK_0289	rpsC	30S ribosomal protein S3 forms a complex with S10 and S14; binds the lower part of the 30S subunit head and the mRNA in the complete ribosome to position it for translation	322738	323436	+	OPeron	318845	319345	319295	1.95	rpoE	promoter=rpoE;box35pos=420;box35seq=gaacga;box10pos=439;box10seq=tcaat
YPK_0289	rpsC	30S ribosomal protein S3 forms a complex with S10 and S14; binds the lower part of the 30S subunit head and the mRNA in the complete ribosome to position it for translation	322738	323436	+	OPeron	318845	319345	319189	1.96	rpoS	promoter=rpoS;box35pos=306;box35seq=tttacg;box10pos=331;box10seq=taatct
YPK_0289	rpsC	30S ribosomal protein S3 forms a complex with S10 and S14; binds the lower part of the 30S subunit head and the mRNA in the complete ribosome to position it for translation	322738	323436	+	OPeron	318845	319345	319117	1.96	rpoD	promoter=rpoD;box35pos=235;box35seq=ttcccc;box10pos=260;box10seq=caaatt
YPK_0290	rplP	50S ribosomal protein L16 located in the peptidyl transferase center and may be involved in peptidyl transferase activity; similar to archaeal L10e	323449	323859	+	OPeron	318845	319345	319295	1.95	rpoE	promoter=rpoE;box35pos=420;box35seq=gaacga;box10pos=439;box10seq=tcaat
YPK_0290	rplP	50S ribosomal protein L16 located in the peptidyl transferase center and may be involved in peptidyl transferase activity; similar to archaeal L10e	323449	323859	+	OPeron	318845	319345	319189	1.96	rpoS	promoter=rpoS;box35pos=306;box35seq=tttacg;box10pos=331;box10seq=taatct
YPK_0290	rplP	50S ribosomal protein L16 located in the peptidyl transferase center and may be involved in peptidyl transferase activity; similar to archaeal L10e	323449	323859	+	OPeron	318845	319345	319117	1.96	rpoD	promoter=rpoD;box35pos=235;box35seq=ttcccc;box10pos=260;box10seq=caaatt
YPK_0296	rpsN	30S ribosomal protein S14 located in the peptidyl transferase center and involved in assembly of 30S ribosome subunit; similar to what is observed with proteins L31 and L33, some proteins in this family contain CXXC motifs that are involved in zinc binding; if two cOPeronies are prese	325749	326054	+	OPeron	323985	324485	324414	1.91	rpoS	promoter=rpoS;box35pos=388;box35seq=ttccta;box10pos=416;box10seq=tataat
YPK_0296	rpsN	30S ribosomal protein S14 located in the peptidyl transferase center and involved in assembly of 30S ribosome subunit; similar to what is observed with proteins L31 and L33, some proteins in this family contain CXXC motifs that are involved in zinc binding; if two cOPeronies are prese	325749	326054	+	OPeron	323985	324485	324415	1.92	rpoD	promoter=rpoD;box35pos=388;box35seq=ttccta;box10pos=416;box10seq=tataat
YPK_0297	rpsH	30S ribosomal protein S8 binds directly to 16S rRNA central domain where it helps coordinate assembly of the platform of the 30S subunit	326088	326480	+	OPeron	323985	324485	324414	1.91	rpoS	promoter=rpoS;box35pos=388;box35seq=ttccta;box10pos=416;box10seq=tataat
YPK_0297	rpsH	30S ribosomal protein S8 binds directly to 16S rRNA central domain where it helps coordinate assembly of the platform of the 30S subunit	326088	326480	+	OPeron	323985	324485	324415	1.92	rpoD	promoter=rpoD;box35pos=388;box35seq=ttccta;box10pos=416;box10seq=tataat
YPK_0298	rplF	50S ribosomal protein L6 ribosomal protein L6 appears to have arisen as a result of an ancient gene duplication as based on structural comparison of the Bacillus stearothermOPeronhilus protein; RNA-binding appears to be in the C-terminal domain; mutations in the L6 gene confer resist	326495	327028	+	OPeron	323985	324485	324414	1.91	rpoS	promoter=rpoS;box35pos=388;box35seq=ttccta;box10pos=416;box10seq=tataat
YPK_0298	rplF	50S ribosomal protein L6 ribosomal protein L6 appears to have arisen as a result of an ancient gene duplication as based on structural comparison of the Bacillus stearothermOPeronhilus protein; RNA-binding appears to be in the C-terminal domain; mutations in the L6 gene confer resist	326495	327028	+	OPeron	323985	324485	324415	1.92	rpoD	promoter=rpoD;box35pos=388;box35seq=ttccta;box10pos=416;box10seq=tataat
YPK_0302	rplO	50S ribosomal protein L15 late assembly protein	328095	328529	+	OPeron	323985	324485	324414	1.91	rpoS	promoter=rpoS;box35pos=388;box35seq=ttccta;box10pos=416;box10seq=tataat
YPK_0302	rplO	50S ribosomal protein L15 late assembly protein	328095	328529	+	OPeron	323985	324485	324415	1.92	rpoD	promoter=rpoD;box35pos=388;box35seq=ttccta;box10pos=416;box10seq=tataat
YPK_0303	secY	preprotein translocase subunit SecY forms heterotrimeric complex in the membrane; in bacteria the complex consists of SecY which forms the channel pore and SecE and SecG; the SecG subunit is not essential; in bacteria translocation is driven via the SecA ATPase	328537	329868	+	OPeron	323985	324485	324414	1.91	rpoS	promoter=rpoS;box35pos=388;box35seq=ttccta;box10pos=416;box10seq=tataat
YPK_0303	secY	preprotein translocase subunit SecY forms heterotrimeric complex in the membrane; in bacteria the complex consists of SecY which forms the channel pore and SecE and SecG; the SecG subunit is not essential; in bacteria translocation is driven via the SecA ATPase	328537	329868	+	OPeron	323985	324485	324415	1.92	rpoD	promoter=rpoD;box35pos=388;box35seq=ttccta;box10pos=416;box10seq=tataat
YPK_0305	rpsM	30S ribosomal protein S13 located at the tOPeron of the head of the 30S subunit, it contacts several helices of the 16S rRNA; makes contact with the large subunit via RNA-protein interactions and via protein-protein interactions with L5; contacts P-site tRNA	330166	330522	+	OPeron	329666	330166	330107	1.95	rpoS	promoter=rpoS;box35pos=405;box35seq=cagcca;box10pos=430;box10seq=aatgct
YPK_0305	rpsM	30S ribosomal protein S13 located at the tOPeron of the head of the 30S subunit, it contacts several helices of the 16S rRNA; makes contact with the large subunit via RNA-protein interactions and via protein-protein interactions with L5; contacts P-site tRNA	330166	330522	+	OPeron	329666	330166	330074	1.94	rpoD	promoter=rpoD;box35pos=373;box35seq=ttgcaa;box10pos=396;box10seq=tagatt
YPK_0306	YPK_0306	30S ribosomal protein S11 located on the platform of the 30S subunit, it bridges several disparate RNA helices of the 16S rRNA; forms part of the Shine-Dalgarno cleft in the 70S ribosome; interacts with S7 and S18 and IF-3	330539	330928	+	OPeron	329666	330166	330107	1.95	rpoS	promoter=rpoS;box35pos=405;box35seq=cagcca;box10pos=430;box10seq=aatgct
YPK_0306	YPK_0306	30S ribosomal protein S11 located on the platform of the 30S subunit, it bridges several disparate RNA helices of the 16S rRNA; forms part of the Shine-Dalgarno cleft in the 70S ribosome; interacts with S7 and S18 and IF-3	330539	330928	+	OPeron	329666	330166	330074	1.94	rpoD	promoter=rpoD;box35pos=373;box35seq=ttgcaa;box10pos=396;box10seq=tagatt
YPK_0307	rpsD	30S ribosomal protein S4 primary rRNA binding protein; nucleates 30S assembly; involved in translational accuracy with proteins S5 and S12; interacts with protein S5; involved in autogeneously regulating ribosomal proteins by binding to pseudoknot structures in the polycistronic	330959	331579	+	OPeron	329666	330166	330107	1.95	rpoS	promoter=rpoS;box35pos=405;box35seq=cagcca;box10pos=430;box10seq=aatgct
YPK_0307	rpsD	30S ribosomal protein S4 primary rRNA binding protein; nucleates 30S assembly; involved in translational accuracy with proteins S5 and S12; interacts with protein S5; involved in autogeneously regulating ribosomal proteins by binding to pseudoknot structures in the polycistronic	330959	331579	+	OPeron	329666	330166	330074	1.94	rpoD	promoter=rpoD;box35pos=373;box35seq=ttgcaa;box10pos=396;box10seq=tagatt
YPK_0308	YPK_0308	DNA-directed RNA polymerase subunit alpha catalyzes the transcription of DNA into RNA using the four ribonucleoside triphosphates as substrates. Dimerization of the alpha subunit is the first step in the sequential assembly of subunits to form the holoenzyme	331605	332594	+	OPeron	329666	330166	330107	1.95	rpoS	promoter=rpoS;box35pos=405;box35seq=cagcca;box10pos=430;box10seq=aatgct
YPK_0308	YPK_0308	DNA-directed RNA polymerase subunit alpha catalyzes the transcription of DNA into RNA using the four ribonucleoside triphosphates as substrates. Dimerization of the alpha subunit is the first step in the sequential assembly of subunits to form the holoenzyme	331605	332594	+	OPeron	329666	330166	330074	1.94	rpoD	promoter=rpoD;box35pos=373;box35seq=ttgcaa;box10pos=396;box10seq=tagatt
YPK_0313	trkA	potassium transporter peripheral membrane protein involved in potassium uptake; found to be peripherally associated with the inner membrane in Escherichia coli; contains an NAD-binding domain	334846	336222	-	OPeron	337567	338067	338160	1.92	rpoE	promoter=rpoE;box35pos=371;box35seq=taactg;box10pos=396;box10seq=tctaa
YPK_0313	trkA	potassium transporter peripheral membrane protein involved in potassium uptake; found to be peripherally associated with the inner membrane in Escherichia coli; contains an NAD-binding domain	334846	336222	-	OPeron	337567	338067	338122	1.93	rpoS	promoter=rpoS;box35pos=406;box35seq=cttcct;box10pos=432;box10seq=taggtt
YPK_0313	trkA	potassium transporter peripheral membrane protein involved in potassium uptake; found to be peripherally associated with the inner membrane in Escherichia coli; contains an NAD-binding domain	334846	336222	-	OPeron	337567	338067	338230	1.94	rpoD	promoter=rpoD;box35pos=303;box35seq=ttgatt;box10pos=325;box10seq=taaaat
YPK_0314	YPK_0314	16S rRNA methyltransferase B catalyzes the methylation of cytosine at position 967 (m5C967) of 16S rRNA; SAM-dependent methyltransferase	336278	337567	-	OPeron	337567	338067	338160	1.92	rpoE	promoter=rpoE;box35pos=371;box35seq=taactg;box10pos=396;box10seq=tctaa
YPK_0314	YPK_0314	16S rRNA methyltransferase B catalyzes the methylation of cytosine at position 967 (m5C967) of 16S rRNA; SAM-dependent methyltransferase	336278	337567	-	OPeron	337567	338067	338122	1.93	rpoS	promoter=rpoS;box35pos=406;box35seq=cttcct;box10pos=432;box10seq=taggtt
YPK_0314	YPK_0314	16S rRNA methyltransferase B catalyzes the methylation of cytosine at position 967 (m5C967) of 16S rRNA; SAM-dependent methyltransferase	336278	337567	-	OPeron	337567	338067	338230	1.94	rpoD	promoter=rpoD;box35pos=303;box35seq=ttgatt;box10pos=325;box10seq=taaaat
YPK_0316	def	peptide deformylase cleaves off formyl group from N-terminal methionine residues of newly synthesized proteins; binds iron(2+)	338633	339145	-	TSS	339183	339683	339829	1.92	rpoS	promoter=rpoS;box35pos=316;box35seq=tttact;box10pos=341;box10seq=tatcca
YPK_0316	def	peptide deformylase cleaves off formyl group from N-terminal methionine residues of newly synthesized proteins; binds iron(2+)	338633	339145	-	TSS	339183	339683	339845	1.91	rpoD	promoter=rpoD;box35pos=300;box35seq=gtgacc;box10pos=326;box10seq=tatggt
YPK_0327	YPK_0327	biotin--protein ligase catalyzes the formation of biotinyl-5'-AMP, also acts as a transcriptional repressor of the biotin OPeroneron	350676	351635	+	OPeron	349142	349642	349590	1.98	rpoE	promoter=rpoE;box35pos=412;box35seq=tcatta;box10pos=437;box10seq=acaaa
YPK_0327	YPK_0327	biotin--protein ligase catalyzes the formation of biotinyl-5'-AMP, also acts as a transcriptional repressor of the biotin OPeroneron	350676	351635	+	OPeron	349142	349642	349591	1.92	rpoS	promoter=rpoS;box35pos=410;box35seq=tttcat;box10pos=436;box10seq=tacaaa
YPK_0327	YPK_0327	biotin--protein ligase catalyzes the formation of biotinyl-5'-AMP, also acts as a transcriptional repressor of the biotin OPeroneron	350676	351635	+	OPeron	349142	349642	349475	1.96	rpoD	promoter=rpoD;box35pos=293;box35seq=ctccca;box10pos=320;box10seq=taccct
YPK_0335	rplK	50S ribosomal protein L11 binds directly to 23S ribosomal RNA	356927	357355	+	TSS	356303	356803	356736	1.91	rpoD	promoter=rpoD;box35pos=400;box35seq=ttgaat;box10pos=421;box10seq=tagaaa
YPK_0354	YPK_0354	transcriptional regulator HU subunit alpha histone-like DNA-binding protein	379454	379729	+	TSS	378810	379310	379172	1.92	rpoE	promoter=rpoE;box35pos=328;box35seq=gatatc;box10pos=351;box10seq=tctat
YPK_0354	YPK_0354	transcriptional regulator HU subunit alpha histone-like DNA-binding protein	379454	379729	+	TSS	378810	379310	379021	1.93	rpoS	promoter=rpoS;box35pos=176;box35seq=ttcatt;box10pos=198;box10seq=aacact
YPK_0354	YPK_0354	transcriptional regulator HU subunit alpha histone-like DNA-binding protein	379454	379729	+	TSS	378810	379310	379062	1.96	rpoD	promoter=rpoD;box35pos=219;box35seq=gatcag;box10pos=240;box10seq=tactgt
YPK_0358	YPK_0358	hypothetical protein	383945	384064	+	SGene	383445	383945	383663	1.92	rpoS	promoter=rpoS;box35pos=184;box35seq=ttgata;box10pos=205;box10seq=caccct
YPK_0358	YPK_0358	hypothetical protein	383945	384064	+	SGene	383445	383945	383800	1.9	rpoD	promoter=rpoD;box35pos=319;box35seq=ttgctg;box10pos=343;box10seq=catttt
YPK_0385	YPK_0385	Hcp1 family type VI secretion system effector TIGRFAM: type VI secretion system effector, Hcp1 family~PFAM: protein of unknown function DUF796~KEGG: ypi:YpsIP31758_0312 hypothetical protein	418592	419110	-	SGene	419110	419610	419696	1.97	rpoE	promoter=rpoE;box35pos=381;box35seq=taatat;box10pos=403;box10seq=acatt
YPK_0385	YPK_0385	Hcp1 family type VI secretion system effector TIGRFAM: type VI secretion system effector, Hcp1 family~PFAM: protein of unknown function DUF796~KEGG: ypi:YpsIP31758_0312 hypothetical protein	418592	419110	-	SGene	419110	419610	419664	1.96	rpoS	promoter=rpoS;box35pos=412;box35seq=ttgaaa;box10pos=433;box10seq=cacagt
YPK_0385	YPK_0385	Hcp1 family type VI secretion system effector TIGRFAM: type VI secretion system effector, Hcp1 family~PFAM: protein of unknown function DUF796~KEGG: ypi:YpsIP31758_0312 hypothetical protein	418592	419110	-	SGene	419110	419610	419749	1.96	rpoD	promoter=rpoD;box35pos=326;box35seq=ttttta;box10pos=348;box10seq=cattat
YPK_0406	YPK_0406	putative cytOPeronlasmic protein KEGG: stm:STM0294 putative cytOPeronlasmic protein	447390	447878	+	OPeron	446645	447145	446967	1.97	rpoE	promoter=rpoE;box35pos=290;box35seq=taatgg;box10pos=311;box10seq=tcgga
YPK_0406	YPK_0406	putative cytOPeronlasmic protein KEGG: stm:STM0294 putative cytOPeronlasmic protein	447390	447878	+	OPeron	446645	447145	447053	1.96	rpoS	promoter=rpoS;box35pos=373;box35seq=ttaaat;box10pos=395;box10seq=tacgat
YPK_0406	YPK_0406	putative cytOPeronlasmic protein KEGG: stm:STM0294 putative cytOPeronlasmic protein	447390	447878	+	OPeron	446645	447145	446942	1.96	rpoD	promoter=rpoD;box35pos=260;box35seq=tataat;box10pos=285;box10seq=tatttt
YPK_0413	YPK_0413	xylose isomerase domain-containing protein PFAM: Xylose isomerase domain protein TIM barrel~KEGG: ypi:YpsIP31758_0344 AP endonuclease, family 2	453206	454105	-	OPeron	455232	455732	455999	1.91	rpoD	promoter=rpoD;box35pos=196;box35seq=ttggca;box10pos=222;box10seq=tagcct
YPK_0428	YPK_0428	Na+/H+ antiporter TIGRFAM: Na+/H+ antiporter~PFAM: sodium/hydrogen exchanger~KEGG: ypm:YP_3917 putative putative Na(+)/H(+) exchanger protein	468170	469819	+	TSS	467603	468103	468044	1.96	rpoE	promoter=rpoE;box35pos=405;box35seq=aactta;box10pos=430;box10seq=tcttt
YPK_0428	YPK_0428	Na+/H+ antiporter TIGRFAM: Na+/H+ antiporter~PFAM: sodium/hydrogen exchanger~KEGG: ypm:YP_3917 putative putative Na(+)/H(+) exchanger protein	468170	469819	+	TSS	467603	468103	468041	1.95	rpoS	promoter=rpoS;box35pos=402;box35seq=gtgaac;box10pos=425;box10seq=tacttt
YPK_0428	YPK_0428	Na+/H+ antiporter TIGRFAM: Na+/H+ antiporter~PFAM: sodium/hydrogen exchanger~KEGG: ypm:YP_3917 putative putative Na(+)/H(+) exchanger protein	468170	469819	+	TSS	467603	468103	467985	1.96	rpoD	promoter=rpoD;box35pos=346;box35seq=tatcaa;box10pos=370;box10seq=tattgt
YPK_0441	YPK_0441	hypothetical protein	484021	484173	+	SGene	483521	484021	483916	1.94	rpoS	promoter=rpoS;box35pos=355;box35seq=ttgctg;box10pos=382;box10seq=catact
YPK_0441	YPK_0441	hypothetical protein	484021	484173	+	SGene	483521	484021	483882	1.93	rpoD	promoter=rpoD;box35pos=326;box35seq=tttaat;box10pos=349;box10seq=taggat
YPK_0452	fis	DNA-binding protein Fis Stimulates excision of phage lambda; affects Mu develOPeronment; acts as an activator of rRNA and iRNA transcription	492765	493061	-	OPeron	494051	494551	494841	1.98	rpoE	promoter=rpoE;box35pos=174;box35seq=gaattg;box10pos=199;box10seq=tcaaa
YPK_0452	fis	DNA-binding protein Fis Stimulates excision of phage lambda; affects Mu develOPeronment; acts as an activator of rRNA and iRNA transcription	492765	493061	-	OPeron	494051	494551	494806	1.95	rpoS	promoter=rpoS;box35pos=207;box35seq=cataat;box10pos=232;box10seq=aaaaat
YPK_0452	fis	DNA-binding protein Fis Stimulates excision of phage lambda; affects Mu develOPeronment; acts as an activator of rRNA and iRNA transcription	492765	493061	-	OPeron	494051	494551	494664	1.96	rpoD	promoter=rpoD;box35pos=349;box35seq=cagaaa;box10pos=374;box10seq=taaaat
YPK_0474	YPK_0474	hypothetical protein KEGG: ypm:YP_3870 hypothetical protein	521283	521456	-	OPeron	522515	523015	523301	1.91	rpoD	promoter=rpoD;box35pos=181;box35seq=ctgata;box10pos=202;box10seq=tagtgt
YPK_0476	YPK_0476	putative phage-like protein KEGG: yps:YPTB3555 putative phage-related protein	521799	522200	-	OPeron	522515	523015	523301	1.91	rpoD	promoter=rpoD;box35pos=181;box35seq=ctgata;box10pos=202;box10seq=tagtgt
YPK_0480	YPK_0480	virulence protein PFAM: virulence plasmid 28.1 kDa A protein~KEGG: ypp:YPDSF_0287 insecticidal toxin	530809	533310	-	OPeron	533310	533810	533920	1.98	rpoE	promoter=rpoE;box35pos=357;box35seq=gatatc;box10pos=379;box10seq=tcggt
YPK_0480	YPK_0480	virulence protein PFAM: virulence plasmid 28.1 kDa A protein~KEGG: ypp:YPDSF_0287 insecticidal toxin	530809	533310	-	OPeron	533310	533810	534059	1.96	rpoS	promoter=rpoS;box35pos=214;box35seq=tttaac;box10pos=238;box10seq=tagtgt
YPK_0480	YPK_0480	virulence protein PFAM: virulence plasmid 28.1 kDa A protein~KEGG: ypp:YPDSF_0287 insecticidal toxin	530809	533310	-	OPeron	533310	533810	533915	1.96	rpoD	promoter=rpoD;box35pos=355;box35seq=ttgata;box10pos=383;box10seq=tagagt
YPK_0494	YPK_0494	trehalose-6-phosphate hydrolase KEGG: ypm:YP_3848 putative trehalose-6-phosphate hydrolase~TIGRFAM: alpha,alpha-phosphotrehalase~PFAM: alpha amylase catalytic region~SMART: alpha amylase catalytic sub domain	546202	547863	-	OPeron	549373	549873	550029	1.92	rpoE	promoter=rpoE;box35pos=308;box35seq=gaacgt;box10pos=333;box10seq=tcaca
YPK_0494	YPK_0494	trehalose-6-phosphate hydrolase KEGG: ypm:YP_3848 putative trehalose-6-phosphate hydrolase~TIGRFAM: alpha,alpha-phosphotrehalase~PFAM: alpha amylase catalytic region~SMART: alpha amylase catalytic sub domain	546202	547863	-	OPeron	549373	549873	550016	1.95	rpoS	promoter=rpoS;box35pos=320;box35seq=tttgta;box10pos=344;box10seq=taaatt
YPK_0494	YPK_0494	trehalose-6-phosphate hydrolase KEGG: ypm:YP_3848 putative trehalose-6-phosphate hydrolase~TIGRFAM: alpha,alpha-phosphotrehalase~PFAM: alpha amylase catalytic region~SMART: alpha amylase catalytic sub domain	546202	547863	-	OPeron	549373	549873	550090	1.96	rpoD	promoter=rpoD;box35pos=242;box35seq=ttggat;box10pos=270;box10seq=taataa
YPK_0504	YPK_0504	putative sigma(54) modulation protein YhbH; resting ribosome-binding protein involved in ribosome stabilization and preservation in stationary phase; binds specifically 100S ribosomes (an inactive ribosome product of a 70S ribosome dimerization); seems to be involved in modulation of the sigm	556049	556336	-	OPeron	560239	560739	560917	1.9	rpoD	promoter=rpoD;box35pos=284;box35seq=ttgaag;box10pos=310;box10seq=caacat
YPK_0526	sspA	stringent starvation protein A transcriptional activator; required for activation of bacteriOPeronhage P1 late promoter; induced by starvation	574577	575218	+	TSS	573895	574395	574301	1.92	rpoS	promoter=rpoS;box35pos=367;box35seq=tttatg;box10pos=393;box10seq=catttt
YPK_0526	sspA	stringent starvation protein A transcriptional activator; required for activation of bacteriOPeronhage P1 late promoter; induced by starvation	574577	575218	+	TSS	573895	574395	574327	1.94	rpoD	promoter=rpoD;box35pos=396;box35seq=tttata;box10pos=419;box10seq=taaact
YPK_0538	YPK_0538	hypothetical protein PFAM: protein of unknown function UPF0102~KEGG: ypm:YP_3803 predicted endonuclease distantly related to archaeal Holliday junction resolvase	590499	590852	-	SGene	590852	591352	591540	1.9	rpoD	promoter=rpoD;box35pos=275;box35seq=tataag;box10pos=300;box10seq=tagcgt
YPK_0547	YPK_0547	hypothetical protein PFAM: protein of unknown function DUF883 ElaB~KEGG: ypi:YpsIP31758_0483 hypothetical protein	598924	599229	-	TSS	599259	599759	599994	1.92	rpoS	promoter=rpoS;box35pos=228;box35seq=ttttag;box10pos=252;box10seq=cacgtt
YPK_0547	YPK_0547	hypothetical protein PFAM: protein of unknown function DUF883 ElaB~KEGG: ypi:YpsIP31758_0483 hypothetical protein	598924	599229	-	TSS	599259	599759	599936	1.91	rpoD	promoter=rpoD;box35pos=289;box35seq=tcggct;box10pos=311;box10seq=tacaat
YPK_0549	YPK_0549	hypothetical protein KEGG: ypi:YpsIP31758_0486 hypothetical protein	599990	600379	-	OPeron	601074	601574	601866	1.95	rpoS	promoter=rpoS;box35pos=169;box35seq=tttact;box10pos=195;box10seq=tactgt
YPK_0549	YPK_0549	hypothetical protein KEGG: ypi:YpsIP31758_0486 hypothetical protein	599990	600379	-	OPeron	601074	601574	601840	1.93	rpoD	promoter=rpoD;box35pos=199;box35seq=gtgcaa;box10pos=222;box10seq=catgat
YPK_0553	YPK_0553	d-galactonate transporter TIGRFAM: d-galactonate transporter~PFAM: major facilitator superfamily MFS_1~KEGG: ypm:YP_2897 ExuT transport protein	603190	604494	-	SGene	604494	604994	605094	1.95	rpoS	promoter=rpoS;box35pos=366;box35seq=ctgact;box10pos=387;box10seq=tataat
YPK_0553	YPK_0553	d-galactonate transporter TIGRFAM: d-galactonate transporter~PFAM: major facilitator superfamily MFS_1~KEGG: ypm:YP_2897 ExuT transport protein	603190	604494	-	SGene	604494	604994	605070	1.92	rpoD	promoter=rpoD;box35pos=385;box35seq=gttata;box10pos=412;box10seq=tatatt
YPK_0565	YPK_0565	putative kinase protein KEGG: yps:YPTB3467 putative kinase protein	622245	623744	-	OPeron	626564	627064	627184	1.9	rpoD	promoter=rpoD;box35pos=347;box35seq=ttgatt;box10pos=368;box10seq=tagaca
YPK_0574	YPK_0574	hypothetical protein KEGG: spe:Spro_4401 hypothetical protein	633374	633679	+	OPeron	628833	629333	629167	1.98	rpoE	promoter=rpoE;box35pos=302;box35seq=aaaatt;box10pos=324;box10seq=actta
YPK_0574	YPK_0574	hypothetical protein KEGG: spe:Spro_4401 hypothetical protein	633374	633679	+	OPeron	628833	629333	629039	1.96	rpoS	promoter=rpoS;box35pos=171;box35seq=cttata;box10pos=193;box10seq=aacgct
YPK_0574	YPK_0574	hypothetical protein KEGG: spe:Spro_4401 hypothetical protein	633374	633679	+	OPeron	628833	629333	629239	1.97	rpoD	promoter=rpoD;box35pos=371;box35seq=gtgatt;box10pos=393;box10seq=tatttt
YPK_0578	YPK_0578	hypothetical protein KEGG: ypm:YP_2920 hypothetical protein	639472	639705	+	OPeron	637176	637676	637563	1.93	rpoE	promoter=rpoE;box35pos=352;box35seq=gcattg;box10pos=376;box10seq=acaga
YPK_0578	YPK_0578	hypothetical protein KEGG: ypm:YP_2920 hypothetical protein	639472	639705	+	OPeron	637176	637676	637417	1.9	rpoS	promoter=rpoS;box35pos=200;box35seq=gtgata;box10pos=228;box10seq=tactat
YPK_0578	YPK_0578	hypothetical protein KEGG: ypm:YP_2920 hypothetical protein	639472	639705	+	OPeron	637176	637676	637489	1.95	rpoD	promoter=rpoD;box35pos=276;box35seq=gggact;box10pos=300;box10seq=catttt
YPK_0582	YPK_0582	putative adhesin/hemolysin KEGG: yps:YPTB3460 possible adhesin/hemolysin	640743	641540	+	OPeron	639477	639977	639772	1.95	rpoE	promoter=rpoE;box35pos=259;box35seq=acactg;box10pos=284;box10seq=gcaga
YPK_0582	YPK_0582	putative adhesin/hemolysin KEGG: yps:YPTB3460 possible adhesin/hemolysin	640743	641540	+	OPeron	639477	639977	639748	1.95	rpoS	promoter=rpoS;box35pos=236;box35seq=gtggag;box10pos=258;box10seq=cacact
YPK_0582	YPK_0582	putative adhesin/hemolysin KEGG: yps:YPTB3460 possible adhesin/hemolysin	640743	641540	+	OPeron	639477	639977	639700	1.96	rpoD	promoter=rpoD;box35pos=186;box35seq=tgggta;box10pos=211;box10seq=taaaat
YPK_0588	YPK_0588	LacI family transcriptional regulator PFAM: regulatory protein LacI; periplasmic binding protein/LacI transcriptional regulator~KEGG: ypi:YpsIP31758_0527 sugar-binding transcriptional regulator, LacI family	651806	652792	+	OPeron	651306	651806	651543	1.92	rpoE	promoter=rpoE;box35pos=204;box35seq=aacctt;box10pos=226;box10seq=tctat
YPK_0588	YPK_0588	LacI family transcriptional regulator PFAM: regulatory protein LacI; periplasmic binding protein/LacI transcriptional regulator~KEGG: ypi:YpsIP31758_0527 sugar-binding transcriptional regulator, LacI family	651806	652792	+	OPeron	651306	651806	651521	1.9	rpoD	promoter=rpoD;box35pos=180;box35seq=gtgacg;box10pos=203;box10seq=taacct
YPK_0600	YPK_0600	Na+/H+ antiporter NhaC PFAM: Citrate transporter; Na+/H+ antiporter NhaC~KEGG: ypn:YPN_0486 membrane protein	665674	667125	+	OPeron	663949	664449	664166	1.98	rpoE	promoter=rpoE;box35pos=188;box35seq=tacata;box10pos=206;box10seq=tcatt
YPK_0600	YPK_0600	Na+/H+ antiporter NhaC PFAM: Citrate transporter; Na+/H+ antiporter NhaC~KEGG: ypn:YPN_0486 membrane protein	665674	667125	+	OPeron	663949	664449	664169	1.96	rpoS	promoter=rpoS;box35pos=183;box35seq=tttaat;box10pos=207;box10seq=catttt
YPK_0600	YPK_0600	Na+/H+ antiporter NhaC PFAM: Citrate transporter; Na+/H+ antiporter NhaC~KEGG: ypn:YPN_0486 membrane protein	665674	667125	+	OPeron	663949	664449	664153	1.97	rpoD	promoter=rpoD;box35pos=167;box35seq=tttaat;box10pos=192;box10seq=taaacc
YPK_0611	YPK_0611	hypothetical protein KEGG: ypi:YpsIP31758_0550 hypothetical protein	674534	675064	+	OPeron	672847	673347	673292	1.92	rpoE	promoter=rpoE;box35pos=409;box35seq=gaactt;box10pos=434;box10seq=tcaga
YPK_0611	YPK_0611	hypothetical protein KEGG: ypi:YpsIP31758_0550 hypothetical protein	674534	675064	+	OPeron	672847	673347	673208	1.9	rpoD	promoter=rpoD;box35pos=324;box35seq=tttaaa;box10pos=349;box10seq=gattct
YPK_0615	YPK_0615	hypothetical protein	678089	678817	+	OPeron	676159	676659	676568	1.95	rpoE	promoter=rpoE;box35pos=375;box35seq=tatatt;box10pos=398;box10seq=tcctt
YPK_0615	YPK_0615	hypothetical protein	678089	678817	+	OPeron	676159	676659	676582	1.95	rpoS	promoter=rpoS;box35pos=388;box35seq=tttaac;box10pos=410;box10seq=tataaa
YPK_0615	YPK_0615	hypothetical protein	678089	678817	+	OPeron	676159	676659	676546	1.96	rpoD	promoter=rpoD;box35pos=354;box35seq=ttaccg;box10pos=375;box10seq=tatatt
YPK_0620	YPK_0620	hypothetical protein	681044	681418	+	OPeron	678461	678961	678673	1.97	rpoE	promoter=rpoE;box35pos=180;box35seq=aaagct;box10pos=201;box10seq=tccat
YPK_0620	YPK_0620	hypothetical protein	681044	681418	+	OPeron	678461	678961	678696	1.95	rpoS	promoter=rpoS;box35pos=199;box35seq=tatcca;box10pos=222;box10seq=aattat
YPK_0620	YPK_0620	hypothetical protein	681044	681418	+	OPeron	678461	678961	678668	1.96	rpoD	promoter=rpoD;box35pos=170;box35seq=tttctg;box10pos=194;box10seq=aaaaat
YPK_0629	YPK_0629	hypothetical protein	687458	687979	+	OPeron	685612	686112	685908	1.98	rpoE	promoter=rpoE;box35pos=263;box35seq=acagtt;box10pos=285;box10seq=tctat
YPK_0629	YPK_0629	hypothetical protein	687458	687979	+	OPeron	685612	686112	686049	1.95	rpoS	promoter=rpoS;box35pos=398;box35seq=tggaaa;box10pos=424;box10seq=aaaaat
YPK_0629	YPK_0629	hypothetical protein	687458	687979	+	OPeron	685612	686112	686024	1.96	rpoD	promoter=rpoD;box35pos=373;box35seq=ttaata;box10pos=400;box10seq=gaaaat
YPK_0631	YPK_0631	hypothetical protein	689126	689434	+	TSS	688591	689091	688962	1.95	rpoE	promoter=rpoE;box35pos=337;box35seq=gcaatc;box10pos=360;box10seq=tcagt
YPK_0631	YPK_0631	hypothetical protein	689126	689434	+	TSS	688591	689091	688910	1.91	rpoD	promoter=rpoD;box35pos=280;box35seq=ttgctc;box10pos=307;box10seq=taaatt
YPK_0634	YPK_0634	RNA polymerase sigma factor RpoD sigma factors are initiation factors that promote the attachment of RNA polymerase to specific initiation sites and are then released; this is the primary sigma factor of bacteria	691156	692994	-	TSS	693150	693650	693742	1.92	rpoS	promoter=rpoS;box35pos=371;box35seq=tttgta;box10pos=395;box10seq=tacgca
YPK_0634	YPK_0634	RNA polymerase sigma factor RpoD sigma factors are initiation factors that promote the attachment of RNA polymerase to specific initiation sites and are then released; this is the primary sigma factor of bacteria	691156	692994	-	TSS	693150	693650	693906	1.93	rpoD	promoter=rpoD;box35pos=210;box35seq=ttggct;box10pos=232;box10seq=tacagt
YPK_0636	rpsU	30S ribosomal protein S21 a small basic protein that is one of the last in the subunit assembly; omission does not prevent assembly but the subunit is inactive; binds central domain of 16S rRNA	695036	695251	-	TSS	695314	695814	696098	1.98	rpoE	promoter=rpoE;box35pos=182;box35seq=tcattc;box10pos=205;box10seq=gctat
YPK_0636	rpsU	30S ribosomal protein S21 a small basic protein that is one of the last in the subunit assembly; omission does not prevent assembly but the subunit is inactive; binds central domain of 16S rRNA	695036	695251	-	TSS	695314	695814	696075	1.96	rpoS	promoter=rpoS;box35pos=203;box35seq=tagcta;box10pos=226;box10seq=cacatt
YPK_0636	rpsU	30S ribosomal protein S21 a small basic protein that is one of the last in the subunit assembly; omission does not prevent assembly but the subunit is inactive; binds central domain of 16S rRNA	695036	695251	-	TSS	695314	695814	696057	1.96	rpoD	promoter=rpoD;box35pos=217;box35seq=tataaa;box10pos=245;box10seq=gaaaat
YPK_0647	YPK_0647	hypothetical protein PFAM: protein of unknown function DUF526~KEGG: ypi:YpsIP31758_0566 hypothetical protein	709139	709420	-	TSS	709451	709951	710032	1.94	rpoD	promoter=rpoD;box35pos=383;box35seq=gcgatt;box10pos=407;box10seq=caacat
YPK_0672	YPK_0672	tonB-system energizer ExbB TIGRFAM: tonB-system energizer ExbB~PFAM: MotA/TolQ/ExbB proton channel~KEGG: ypm:YP_2997 TonB complex protein	736462	737499	+	TSS	735917	736417	736246	1.96	rpoE	promoter=rpoE;box35pos=299;box35seq=gactta;box10pos=318;box10seq=tcaat
YPK_0672	YPK_0672	tonB-system energizer ExbB TIGRFAM: tonB-system energizer ExbB~PFAM: MotA/TolQ/ExbB proton channel~KEGG: ypm:YP_2997 TonB complex protein	736462	737499	+	TSS	735917	736417	736165	1.91	rpoS	promoter=rpoS;box35pos=212;box35seq=tttcta;box10pos=235;box10seq=aattct
YPK_0672	YPK_0672	tonB-system energizer ExbB TIGRFAM: tonB-system energizer ExbB~PFAM: MotA/TolQ/ExbB proton channel~KEGG: ypm:YP_2997 TonB complex protein	736462	737499	+	TSS	735917	736417	736194	1.94	rpoD	promoter=rpoD;box35pos=241;box35seq=gtgtaa;box10pos=265;box10seq=tattaa
YPK_0679	YPK_0679	putative lipOPeronrotein KEGG: ypi:YpsIP31758_0596 putative lipOPeronrotein	740637	741407	-	OPeron	748749	749249	749487	1.98	rpoE	promoter=rpoE;box35pos=229;box35seq=tccctt;box10pos=251;box10seq=actaa
YPK_0679	YPK_0679	putative lipOPeronrotein KEGG: ypi:YpsIP31758_0596 putative lipOPeronrotein	740637	741407	-	OPeron	748749	749249	749529	1.96	rpoS	promoter=rpoS;box35pos=182;box35seq=tttaaa;box10pos=207;box10seq=taatat
YPK_0679	YPK_0679	putative lipOPeronrotein KEGG: ypi:YpsIP31758_0596 putative lipOPeronrotein	740637	741407	-	OPeron	748749	749249	749500	1.96	rpoD	promoter=rpoD;box35pos=212;box35seq=ttaacg;box10pos=238;box10seq=taagat
YPK_0681	YPK_0681	type II secretion system protein PFAM: type II secretion system protein~KEGG: ypm:YP_3004 hypothetical protein	742221	743096	-	OPeron	748749	749249	749487	1.98	rpoE	promoter=rpoE;box35pos=229;box35seq=tccctt;box10pos=251;box10seq=actaa
YPK_0681	YPK_0681	type II secretion system protein PFAM: type II secretion system protein~KEGG: ypm:YP_3004 hypothetical protein	742221	743096	-	OPeron	748749	749249	749529	1.96	rpoS	promoter=rpoS;box35pos=182;box35seq=tttaaa;box10pos=207;box10seq=taatat
YPK_0681	YPK_0681	type II secretion system protein PFAM: type II secretion system protein~KEGG: ypm:YP_3004 hypothetical protein	742221	743096	-	OPeron	748749	749249	749500	1.96	rpoD	promoter=rpoD;box35pos=212;box35seq=ttaacg;box10pos=238;box10seq=taagat
YPK_0701	YPK_0701	hypothetical protein KEGG: ypa:YPA_3089 hypothetical protein	764093	764224	+	SGene	763593	764093	763869	1.91	rpoD	promoter=rpoD;box35pos=240;box35seq=ccgact;box10pos=264;box10seq=tatttt
YPK_0709	YPK_0709	sigma-54 dependent trancsriptional regulator PFAM: sigma-54 factor interaction domain-containing protein; helix-turn-helix Fis-type~SMART: AAA ATPase~KEGG: ypp:YPDSF_0496 sigma-54 transcriptional regulatory protein	771158	772186	+	OPeron	770658	771158	770954	1.98	rpoE	promoter=rpoE;box35pos=262;box35seq=gatatt;box10pos=285;box10seq=tcatt
YPK_0709	YPK_0709	sigma-54 dependent trancsriptional regulator PFAM: sigma-54 factor interaction domain-containing protein; helix-turn-helix Fis-type~SMART: AAA ATPase~KEGG: ypp:YPDSF_0496 sigma-54 transcriptional regulatory protein	771158	772186	+	OPeron	770658	771158	770935	1.96	rpoS	promoter=rpoS;box35pos=243;box35seq=tttatt;box10pos=264;box10seq=tatttt
YPK_0709	YPK_0709	sigma-54 dependent trancsriptional regulator PFAM: sigma-54 factor interaction domain-containing protein; helix-turn-helix Fis-type~SMART: AAA ATPase~KEGG: ypp:YPDSF_0496 sigma-54 transcriptional regulatory protein	771158	772186	+	OPeron	770658	771158	770910	1.98	rpoD	promoter=rpoD;box35pos=218;box35seq=tataca;box10pos=240;box10seq=taattt
YPK_0720	flgC	flagellar basal body rod protein FlgC with FlgF and C makes up the proximal portion of the flagellar basal body rod; Vibrio parahaemolyticus protein is associated with the lateral flagella	780374	780799	+	OPeron	2657818	2658318	2658096	1.96	rpoD	promoter=rpoD;box35pos=243;box35seq=gcggta;box10pos=266;box10seq=tatcgt
YPK_0732	YPK_0732	hypothetical protein KEGG: ypa:YPA_3042 hypothetical protein	790308	790904	+	TSS	789769	790269	790210	1.96	rpoE	promoter=rpoE;box35pos=409;box35seq=taatct;box10pos=430;box10seq=tcata
YPK_0732	YPK_0732	hypothetical protein KEGG: ypa:YPA_3042 hypothetical protein	790308	790904	+	TSS	789769	790269	790217	1.95	rpoS	promoter=rpoS;box35pos=413;box35seq=ctggcc;box10pos=435;box10seq=cataat
YPK_0732	YPK_0732	hypothetical protein KEGG: ypa:YPA_3042 hypothetical protein	790308	790904	+	TSS	789769	790269	790152	1.96	rpoD	promoter=rpoD;box35pos=346;box35seq=ttattg;box10pos=370;box10seq=tatatt
YPK_0740	YPK_0740	putative integral membrane efflux protein KEGG: ypm:YP_3412 putative integral membrane efflux protein	800713	800931	+	OPeron	796008	796508	796211	1.97	rpoE	promoter=rpoE;box35pos=174;box35seq=taacgt;box10pos=192;box10seq=tctat
YPK_0740	YPK_0740	putative integral membrane efflux protein KEGG: ypm:YP_3412 putative integral membrane efflux protein	800713	800931	+	OPeron	796008	796508	796371	1.95	rpoS	promoter=rpoS;box35pos=327;box35seq=tgggaa;box10pos=350;box10seq=tagagt
YPK_0740	YPK_0740	putative integral membrane efflux protein KEGG: ypm:YP_3412 putative integral membrane efflux protein	800713	800931	+	OPeron	796008	796508	796304	1.92	rpoD	promoter=rpoD;box35pos=262;box35seq=ttgaag;box10pos=285;box10seq=tatcaa
YPK_0741	YPK_0741	ShET2 enterotoxin domain-containing protein PFAM: ShET2 enterotoxin domain protein~KEGG: yps:YPTB3305 enterotoxin-like protein	801066	802562	-	SGene	802562	803062	803243	1.97	rpoE	promoter=rpoE;box35pos=286;box35seq=aaacat;box10pos=308;box10seq=gctga
YPK_0741	YPK_0741	ShET2 enterotoxin domain-containing protein PFAM: ShET2 enterotoxin domain protein~KEGG: yps:YPTB3305 enterotoxin-like protein	801066	802562	-	SGene	802562	803062	803315	1.95	rpoS	promoter=rpoS;box35pos=209;box35seq=ttgacc;box10pos=234;box10seq=tagttt
YPK_0741	YPK_0741	ShET2 enterotoxin domain-containing protein PFAM: ShET2 enterotoxin domain protein~KEGG: yps:YPTB3305 enterotoxin-like protein	801066	802562	-	SGene	802562	803062	803356	1.97	rpoD	promoter=rpoD;box35pos=171;box35seq=tttaat;box10pos=194;box10seq=tattca
YPK_0773	YPK_0773	hypothetical protein KEGG: ypi:YpsIP31758_0701 hypothetical protein	878275	878790	+	OPeron	876795	877295	877030	1.98	rpoE	promoter=rpoE;box35pos=206;box35seq=taatgt;box10pos=224;box10seq=tctaa
YPK_0773	YPK_0773	hypothetical protein KEGG: ypi:YpsIP31758_0701 hypothetical protein	878275	878790	+	OPeron	876795	877295	877024	1.95	rpoS	promoter=rpoS;box35pos=189;box35seq=gttatt;box10pos=216;box10seq=tataat
YPK_0773	YPK_0773	hypothetical protein KEGG: ypi:YpsIP31758_0701 hypothetical protein	878275	878790	+	OPeron	876795	877295	877023	1.97	rpoD	promoter=rpoD;box35pos=189;box35seq=gttatt;box10pos=216;box10seq=tataat
YPK_0778	YPK_0778	anion transporter TIGRFAM: anion transporter~PFAM: sodium/sulphate symporter; Citrate transporter~KEGG: ypm:YP_3442 di- and tricarboxylate transporters	881824	883203	-	TSS	883281	883781	884073	1.94	rpoE	promoter=rpoE;box35pos=174;box35seq=caactc;box10pos=197;box10seq=tcaat
YPK_0778	YPK_0778	anion transporter TIGRFAM: anion transporter~PFAM: sodium/sulphate symporter; Citrate transporter~KEGG: ypm:YP_3442 di- and tricarboxylate transporters	881824	883203	-	TSS	883281	883781	884076	1.93	rpoS	promoter=rpoS;box35pos=166;box35seq=cggata;box10pos=192;box10seq=catttt
YPK_0778	YPK_0778	anion transporter TIGRFAM: anion transporter~PFAM: sodium/sulphate symporter; Citrate transporter~KEGG: ypm:YP_3442 di- and tricarboxylate transporters	881824	883203	-	TSS	883281	883781	884001	1.96	rpoD	promoter=rpoD;box35pos=245;box35seq=gcgcca;box10pos=268;box10seq=taaggt
YPK_0791	YPK_0791	LuxR family transcriptional regulator PFAM: regulatory protein LuxR; Autoinducer-binding domain protein~KEGG: ypi:YpsIP31758_0720 transcriptional regulator, LuxR family	900476	901219	+	SGene	899976	900476	900228	1.98	rpoE	promoter=rpoE;box35pos=220;box35seq=aaaata;box10pos=241;box10seq=gcaaa
YPK_0791	YPK_0791	LuxR family transcriptional regulator PFAM: regulatory protein LuxR; Autoinducer-binding domain protein~KEGG: ypi:YpsIP31758_0720 transcriptional regulator, LuxR family	900476	901219	+	SGene	899976	900476	900268	1.95	rpoS	promoter=rpoS;box35pos=255;box35seq=gagcta;box10pos=278;box10seq=tacaga
YPK_0791	YPK_0791	LuxR family transcriptional regulator PFAM: regulatory protein LuxR; Autoinducer-binding domain protein~KEGG: ypi:YpsIP31758_0720 transcriptional regulator, LuxR family	900476	901219	+	SGene	899976	900476	900317	1.96	rpoD	promoter=rpoD;box35pos=304;box35seq=gtgcac;box10pos=328;box10seq=tattat
YPK_0848	YPK_0848	transposase IS200-family protein PFAM: transposase IS200-family protein~KEGG: ypi:YpsIP31758_3905 IS1541, transposase	969023	969481	+	OPeron	968378	968878	968663	1.91	rpoS	promoter=rpoS;box35pos=248;box35seq=ttggtg;box10pos=272;box10seq=tacggt
YPK_0848	YPK_0848	transposase IS200-family protein PFAM: transposase IS200-family protein~KEGG: ypi:YpsIP31758_3905 IS1541, transposase	969023	969481	+	OPeron	968378	968878	968722	1.91	rpoD	promoter=rpoD;box35pos=306;box35seq=tacata;box10pos=332;box10seq=taaaat
YPK_0852	pgk	phosphoglycerate kinase Converts 3-phospho-D-glycerate to 3-phospho-D-glyceroyl phosphate during the glycolysis pathway	974549	975712	+	TSS	973764	974264	973971	1.92	rpoS	promoter=rpoS;box35pos=172;box35seq=ttgctt;box10pos=194;box10seq=cactgt
YPK_0859	YPK_0859	D-3-phosphoglycerate dehydrogenase catalyzes the formation of 3-phosphonooxypyruvate from 3-phospho-D-glycerate in serine biosynthesis; can also reduce alpha ketoglutarate to form 2-hydroxyglutarate	982274	983515	+	TSS	981711	982211	982072	1.95	rpoE	promoter=rpoE;box35pos=325;box35seq=aaacca;box10pos=350;box10seq=tcaca
YPK_0859	YPK_0859	D-3-phosphoglycerate dehydrogenase catalyzes the formation of 3-phosphonooxypyruvate from 3-phospho-D-glycerate in serine biosynthesis; can also reduce alpha ketoglutarate to form 2-hydroxyglutarate	982274	983515	+	TSS	981711	982211	982124	1.95	rpoS	promoter=rpoS;box35pos=378;box35seq=ctgtcg;box10pos=400;box10seq=tagttt
YPK_0859	YPK_0859	D-3-phosphoglycerate dehydrogenase catalyzes the formation of 3-phosphonooxypyruvate from 3-phospho-D-glycerate in serine biosynthesis; can also reduce alpha ketoglutarate to form 2-hydroxyglutarate	982274	983515	+	TSS	981711	982211	982123	1.96	rpoD	promoter=rpoD;box35pos=378;box35seq=ctgtcg;box10pos=400;box10seq=tagttt
YPK_0903	YPK_0903	hypothetical protein KEGG: spt:SPA2615 putative phage gene	1024397	1025068	+	OPeron	1022957	1023457	1023389	1.93	rpoE	promoter=rpoE;box35pos=400;box35seq=gaataa;box10pos=421;box10seq=gccaa
YPK_0903	YPK_0903	hypothetical protein KEGG: spt:SPA2615 putative phage gene	1024397	1025068	+	OPeron	1022957	1023457	1023372	1.96	rpoD	promoter=rpoD;box35pos=378;box35seq=ccgatt;box10pos=403;box10seq=taataa
YPK_0913	YPK_0913	phage-like protein KEGG: yen:YE0882 hypothetical phage-related protein	1031744	1032379	+	OPeron	1027766	1028266	1027969	1.98	rpoE	promoter=rpoE;box35pos=167;box35seq=gcattt;box10pos=192;box10seq=tcagt
YPK_0913	YPK_0913	phage-like protein KEGG: yen:YE0882 hypothetical phage-related protein	1031744	1032379	+	OPeron	1027766	1028266	1028050	1.95	rpoS	promoter=rpoS;box35pos=248;box35seq=ctgcaa;box10pos=271;box10seq=taaggt
YPK_0913	YPK_0913	phage-like protein KEGG: yen:YE0882 hypothetical phage-related protein	1031744	1032379	+	OPeron	1027766	1028266	1028006	1.94	rpoD	promoter=rpoD;box35pos=204;box35seq=ccaaag;box10pos=228;box10seq=taaaaa
YPK_0915	YPK_0915	tail assembly chaperone gp38 PFAM: tail assembly chaperone gp38~KEGG: yps:YPTB1288 putative tail fiber assembly protein P37	1034170	1034598	+	OPeron	1027766	1028266	1027969	1.98	rpoE	promoter=rpoE;box35pos=167;box35seq=gcattt;box10pos=192;box10seq=tcagt
YPK_0915	YPK_0915	tail assembly chaperone gp38 PFAM: tail assembly chaperone gp38~KEGG: yps:YPTB1288 putative tail fiber assembly protein P37	1034170	1034598	+	OPeron	1027766	1028266	1028050	1.95	rpoS	promoter=rpoS;box35pos=248;box35seq=ctgcaa;box10pos=271;box10seq=taaggt
YPK_0915	YPK_0915	tail assembly chaperone gp38 PFAM: tail assembly chaperone gp38~KEGG: yps:YPTB1288 putative tail fiber assembly protein P37	1034170	1034598	+	OPeron	1027766	1028266	1028006	1.94	rpoD	promoter=rpoD;box35pos=204;box35seq=ccaaag;box10pos=228;box10seq=taaaaa
YPK_0917	YPK_0917	hypothetical protein KEGG: plu:plu4051 hypothetical protein	1035285	1035833	+	OPeron	1027766	1028266	1027969	1.98	rpoE	promoter=rpoE;box35pos=167;box35seq=gcattt;box10pos=192;box10seq=tcagt
YPK_0917	YPK_0917	hypothetical protein KEGG: plu:plu4051 hypothetical protein	1035285	1035833	+	OPeron	1027766	1028266	1028050	1.95	rpoS	promoter=rpoS;box35pos=248;box35seq=ctgcaa;box10pos=271;box10seq=taaggt
YPK_0917	YPK_0917	hypothetical protein KEGG: plu:plu4051 hypothetical protein	1035285	1035833	+	OPeron	1027766	1028266	1028006	1.94	rpoD	promoter=rpoD;box35pos=204;box35seq=ccaaag;box10pos=228;box10seq=taaaaa
YPK_0935	YPK_0935	hypothetical protein KEGG: yps:YPTB3148 hypothetical protein	1054290	1054580	-	OPeron	1057362	1057862	1057941	1.9	rpoS	promoter=rpoS;box35pos=380;box35seq=ttttcg;box10pos=408;box10seq=taaaat
YPK_0935	YPK_0935	hypothetical protein KEGG: yps:YPTB3148 hypothetical protein	1054290	1054580	-	OPeron	1057362	1057862	1057942	1.91	rpoD	promoter=rpoD;box35pos=380;box35seq=ttttcg;box10pos=408;box10seq=taaaat
YPK_0939	YPK_0939	head completion protein PFAM: head completion protein~KEGG: yen:YE0871 head completion/stabilization protein	1056910	1057362	-	OPeron	1057362	1057862	1057941	1.9	rpoS	promoter=rpoS;box35pos=380;box35seq=ttttcg;box10pos=408;box10seq=taaaat
YPK_0939	YPK_0939	head completion protein PFAM: head completion protein~KEGG: yen:YE0871 head completion/stabilization protein	1056910	1057362	-	OPeron	1057362	1057862	1057942	1.91	rpoD	promoter=rpoD;box35pos=380;box35seq=ttttcg;box10pos=408;box10seq=taaaat
YPK_0940	YPK_0940	small terminase subunit PFAM: small terminase subunit~KEGG: yen:YE0870 probable terminase, endonuclease subunit	1057482	1058225	-	OPeron	1059415	1059915	1060171	1.91	rpoD	promoter=rpoD;box35pos=202;box35seq=ctgaat;box10pos=230;box10seq=taattt
YPK_0943	YPK_0943	hypothetical protein PFAM: protein of unknown function DUF264; putative terminase ATPase subunit~KEGG: yen:YE0867 terminase, ATPase subunit	1060611	1062704	+	OPeron	1060111	1060611	1060537	1.97	rpoE	promoter=rpoE;box35pos=393;box35seq=tcatta;box10pos=415;box10seq=tccaa
YPK_0943	YPK_0943	hypothetical protein PFAM: protein of unknown function DUF264; putative terminase ATPase subunit~KEGG: yen:YE0867 terminase, ATPase subunit	1060611	1062704	+	OPeron	1060111	1060611	1060533	1.95	rpoS	promoter=rpoS;box35pos=387;box35seq=ttaatt;box10pos=409;box10seq=caaact
YPK_0943	YPK_0943	hypothetical protein PFAM: protein of unknown function DUF264; putative terminase ATPase subunit~KEGG: yen:YE0867 terminase, ATPase subunit	1060611	1062704	+	OPeron	1060111	1060611	1060525	1.96	rpoD	promoter=rpoD;box35pos=375;box35seq=gagtat;box10pos=402;box10seq=cattgt
YPK_0947	YPK_0947	hypothetical protein KEGG: ypi:YpsIP31758_0892 hypothetical protein	1064438	1064590	+	OPeron	1063619	1064119	1063944	1.98	rpoE	promoter=rpoE;box35pos=293;box35seq=acaatt;box10pos=315;box10seq=gcaga
YPK_0947	YPK_0947	hypothetical protein KEGG: ypi:YpsIP31758_0892 hypothetical protein	1064438	1064590	+	OPeron	1063619	1064119	1063952	1.96	rpoS	promoter=rpoS;box35pos=297;box35seq=tttatg;box10pos=320;box10seq=taatct
YPK_0947	YPK_0947	hypothetical protein KEGG: ypi:YpsIP31758_0892 hypothetical protein	1064438	1064590	+	OPeron	1063619	1064119	1063923	1.98	rpoD	promoter=rpoD;box35pos=268;box35seq=tagcaa;box10pos=292;box10seq=tacaat
YPK_0958	YPK_0958	hypothetical protein KEGG: ypi:YpsIP31758_0902 hypothetical protein	1074448	1075227	+	SGene	1073948	1074448	1074371	1.98	rpoE	promoter=rpoE;box35pos=387;box35seq=accatt;box10pos=412;box10seq=acata
YPK_0958	YPK_0958	hypothetical protein KEGG: ypi:YpsIP31758_0902 hypothetical protein	1074448	1075227	+	SGene	1073948	1074448	1074241	1.95	rpoS	promoter=rpoS;box35pos=257;box35seq=cttacg;box10pos=280;box10seq=catatt
YPK_0958	YPK_0958	hypothetical protein KEGG: ypi:YpsIP31758_0902 hypothetical protein	1074448	1075227	+	SGene	1073948	1074448	1074356	1.97	rpoD	promoter=rpoD;box35pos=374;box35seq=gtgatg;box10pos=397;box10seq=catatt
YPK_0959	YPK_0959	PAAR repeat-containing protein PFAM: PAAR repeat-containing protein~KEGG: ypi:YpsIP31758_0903 PaaR domain protein	1075483	1075749	+	SGene	1074983	1075483	1075399	1.98	rpoE	promoter=rpoE;box35pos=383;box35seq=taactg;box10pos=405;box10seq=gctat
YPK_0959	YPK_0959	PAAR repeat-containing protein PFAM: PAAR repeat-containing protein~KEGG: ypi:YpsIP31758_0903 PaaR domain protein	1075483	1075749	+	SGene	1074983	1075483	1075255	1.96	rpoS	promoter=rpoS;box35pos=236;box35seq=tttctt;box10pos=259;box10seq=tattat
YPK_0959	YPK_0959	PAAR repeat-containing protein PFAM: PAAR repeat-containing protein~KEGG: ypi:YpsIP31758_0903 PaaR domain protein	1075483	1075749	+	SGene	1074983	1075483	1075254	1.97	rpoD	promoter=rpoD;box35pos=236;box35seq=tttctt;box10pos=259;box10seq=tattat
YPK_0997	YPK_0997	lyase PFAM: polysaccharide lyase family 8; Lyase ; Lyase catalytic~KEGG: yps:YPTB3073 possible chondroitin ABC lyase	1119977	1123051	-	SGene	1123051	1123551	1123829	1.98	rpoE	promoter=rpoE;box35pos=190;box35seq=gactaa;box10pos=211;box10seq=gcaaa
YPK_0997	YPK_0997	lyase PFAM: polysaccharide lyase family 8; Lyase ; Lyase catalytic~KEGG: yps:YPTB3073 possible chondroitin ABC lyase	1119977	1123051	-	SGene	1123051	1123551	1123797	1.95	rpoS	promoter=rpoS;box35pos=216;box35seq=ttagag;box10pos=241;box10seq=tattat
YPK_0997	YPK_0997	lyase PFAM: polysaccharide lyase family 8; Lyase ; Lyase catalytic~KEGG: yps:YPTB3073 possible chondroitin ABC lyase	1119977	1123051	-	SGene	1123051	1123551	1123846	1.96	rpoD	promoter=rpoD;box35pos=165;box35seq=ttgtag;box10pos=193;box10seq=taagat
YPK_1004	YPK_1004	general secretion pathway protein D TIGRFAM: general secretion pathway protein D~PFAM: type II and III secretion system protein; NolW domain protein~KEGG: yps:YPTB3065 general secretion pathway protein D	1130266	1132188	+	OPeron	1128696	1129196	1128947	1.98	rpoE	promoter=rpoE;box35pos=218;box35seq=taacat;box10pos=239;box10seq=tctgt
YPK_1004	YPK_1004	general secretion pathway protein D TIGRFAM: general secretion pathway protein D~PFAM: type II and III secretion system protein; NolW domain protein~KEGG: yps:YPTB3065 general secretion pathway protein D	1130266	1132188	+	OPeron	1128696	1129196	1128898	1.96	rpoS	promoter=rpoS;box35pos=160;box35seq=gtgatt;box10pos=188;box10seq=aaaact
YPK_1004	YPK_1004	general secretion pathway protein D TIGRFAM: general secretion pathway protein D~PFAM: type II and III secretion system protein; NolW domain protein~KEGG: yps:YPTB3065 general secretion pathway protein D	1130266	1132188	+	OPeron	1128696	1129196	1128902	1.97	rpoD	promoter=rpoD;box35pos=171;box35seq=ttgtta;box10pos=194;box10seq=gatttt
YPK_1006	YPK_1006	type II secretion system protein PFAM: type II secretion system protein~KEGG: ypm:YP_2842 putative general protein secretion protein	1133683	1134885	+	OPeron	1128696	1129196	1128947	1.98	rpoE	promoter=rpoE;box35pos=218;box35seq=taacat;box10pos=239;box10seq=tctgt
YPK_1006	YPK_1006	type II secretion system protein PFAM: type II secretion system protein~KEGG: ypm:YP_2842 putative general protein secretion protein	1133683	1134885	+	OPeron	1128696	1129196	1128898	1.96	rpoS	promoter=rpoS;box35pos=160;box35seq=gtgatt;box10pos=188;box10seq=aaaact
YPK_1006	YPK_1006	type II secretion system protein PFAM: type II secretion system protein~KEGG: ypm:YP_2842 putative general protein secretion protein	1133683	1134885	+	OPeron	1128696	1129196	1128902	1.97	rpoD	promoter=rpoD;box35pos=171;box35seq=ttgtta;box10pos=194;box10seq=gatttt
YPK_1011	YPK_1011	general secretion pathway protein K KEGG: ypi:YpsIP31758_0959 general secretion pathway protein K	1136869	1137825	+	OPeron	1128696	1129196	1128947	1.98	rpoE	promoter=rpoE;box35pos=218;box35seq=taacat;box10pos=239;box10seq=tctgt
YPK_1011	YPK_1011	general secretion pathway protein K KEGG: ypi:YpsIP31758_0959 general secretion pathway protein K	1136869	1137825	+	OPeron	1128696	1129196	1128898	1.96	rpoS	promoter=rpoS;box35pos=160;box35seq=gtgatt;box10pos=188;box10seq=aaaact
YPK_1011	YPK_1011	general secretion pathway protein K KEGG: ypi:YpsIP31758_0959 general secretion pathway protein K	1136869	1137825	+	OPeron	1128696	1129196	1128902	1.97	rpoD	promoter=rpoD;box35pos=171;box35seq=ttgtta;box10pos=194;box10seq=gatttt
YPK_1061	YPK_1061	flavodoxin An electron-transfer protein; flavodoxin binds one FMN molecule, which serves as a redox-active prosthetic group	1198117	1198566	+	OPeron	1196484	1196984	1196910	1.95	rpoS	promoter=rpoS;box35pos=391;box35seq=ctgaat;box10pos=413;box10seq=taattt
YPK_1061	YPK_1061	flavodoxin An electron-transfer protein; flavodoxin binds one FMN molecule, which serves as a redox-active prosthetic group	1198117	1198566	+	OPeron	1196484	1196984	1196909	1.92	rpoD	promoter=rpoD;box35pos=391;box35seq=ctgaat;box10pos=413;box10seq=taattt
YPK_1066	rpsB	30S ribosomal protein S2 one of the last subunits in the assembly of the 30S subunit; absence of S2 does not inhibit assembly but results in an inactive subunit	1204135	1204860	+	TSS	1203401	1203901	1203839	1.91	rpoD	promoter=rpoD;box35pos=403;box35seq=tatcag;box10pos=425;box10seq=caaatt
YPK_1074	YPK_1074	outer membrane protein assembly factor YaeT part of a complex with YfgL, YfiO, and NlpB involved in outer membrane protein biosynthesis; involved in the assembly of outer membrane proteins	1212143	1214530	+	TSS	1211298	1211798	1211745	1.92	rpoE	promoter=rpoE;box35pos=414;box35seq=caatat;box10pos=436;box10seq=tctat
YPK_1074	YPK_1074	outer membrane protein assembly factor YaeT part of a complex with YfgL, YfiO, and NlpB involved in outer membrane protein biosynthesis; involved in the assembly of outer membrane proteins	1212143	1214530	+	TSS	1211298	1211798	1211725	1.93	rpoS	promoter=rpoS;box35pos=387;box35seq=cttccg;box10pos=414;box10seq=caatat
YPK_1074	YPK_1074	outer membrane protein assembly factor YaeT part of a complex with YfgL, YfiO, and NlpB involved in outer membrane protein biosynthesis; involved in the assembly of outer membrane proteins	1212143	1214530	+	TSS	1211298	1211798	1211709	1.93	rpoD	promoter=rpoD;box35pos=378;box35seq=gtgata;box10pos=399;box10seq=tataaa
YPK_1075	YPK_1075	periplasmic chaperone PFAM: outer membrane chaperone Skp (OmpH)~KEGG: yps:YPTB2994 cationic 19 kDa outer membrane protein precursor	1214688	1215185	+	OPeron	1214188	1214688	1214569	1.91	rpoD	promoter=rpoD;box35pos=344;box35seq=ttgatg;box10pos=370;box10seq=taaaga
YPK_1118	nrdI	ribonucleotide reductase stimulatory protein in Salmonella NrdI has a stimulatory effect on the ribonucleotide reductase activity of NrdH with NrdEF	1259296	1259700	-	OPeron	1259950	1260450	1260570	1.94	rpoE	promoter=rpoE;box35pos=350;box35seq=gatcaa;box10pos=369;box10seq=tcaaa
YPK_1118	nrdI	ribonucleotide reductase stimulatory protein in Salmonella NrdI has a stimulatory effect on the ribonucleotide reductase activity of NrdH with NrdEF	1259296	1259700	-	OPeron	1259950	1260450	1260744	1.94	rpoS	promoter=rpoS;box35pos=169;box35seq=gttatt;box10pos=193;box10seq=tattca
YPK_1118	nrdI	ribonucleotide reductase stimulatory protein in Salmonella NrdI has a stimulatory effect on the ribonucleotide reductase activity of NrdH with NrdEF	1259296	1259700	-	OPeron	1259950	1260450	1260618	1.95	rpoD	promoter=rpoD;box35pos=299;box35seq=gatctc;box10pos=320;box10seq=taattt
YPK_1126	YPK_1126	binding-protein-dependent transport system inner membrane protein PFAM: binding-protein-dependent transport systems inner membrane component~KEGG: ypm:YP_2462 putative membrane protein	1265797	1266765	+	OPeron	1263720	1264220	1264018	1.98	rpoE	promoter=rpoE;box35pos=262;box35seq=tcatgt;box10pos=287;box10seq=tctga
YPK_1126	YPK_1126	binding-protein-dependent transport system inner membrane protein PFAM: binding-protein-dependent transport systems inner membrane component~KEGG: ypm:YP_2462 putative membrane protein	1265797	1266765	+	OPeron	1263720	1264220	1264045	1.96	rpoS	promoter=rpoS;box35pos=288;box35seq=ctgatt;box10pos=312;box10seq=tataat
YPK_1126	YPK_1126	binding-protein-dependent transport system inner membrane protein PFAM: binding-protein-dependent transport systems inner membrane component~KEGG: ypm:YP_2462 putative membrane protein	1265797	1266765	+	OPeron	1263720	1264220	1264053	1.97	rpoD	promoter=rpoD;box35pos=299;box35seq=ttgatt;box10pos=321;box10seq=gaaatt
YPK_1128	YPK_1128	ABC transporter-like protein PFAM: ABC transporter related~SMART: AAA ATPase~KEGG: ypm:YP_2464 putative transport ATPase	1267568	1268374	+	OPeron	1263720	1264220	1264018	1.98	rpoE	promoter=rpoE;box35pos=262;box35seq=tcatgt;box10pos=287;box10seq=tctga
YPK_1128	YPK_1128	ABC transporter-like protein PFAM: ABC transporter related~SMART: AAA ATPase~KEGG: ypm:YP_2464 putative transport ATPase	1267568	1268374	+	OPeron	1263720	1264220	1264045	1.96	rpoS	promoter=rpoS;box35pos=288;box35seq=ctgatt;box10pos=312;box10seq=tataat
YPK_1128	YPK_1128	ABC transporter-like protein PFAM: ABC transporter related~SMART: AAA ATPase~KEGG: ypm:YP_2464 putative transport ATPase	1267568	1268374	+	OPeron	1263720	1264220	1264053	1.97	rpoD	promoter=rpoD;box35pos=299;box35seq=ttgatt;box10pos=321;box10seq=gaaatt
YPK_1131	ureA	urease subunit gamma UreA, with UreB and UreC catalyzes the hydrolysis of urea into ammonia and carbon dioxide; nickel metalloenzyme; accessory proteins UreD, UreE, UreF, and UreG are necessary for assembly of the metallocenter	1270231	1270533	+	TSS	1269104	1269604	1269551	1.95	rpoS	promoter=rpoS;box35pos=411;box35seq=tttgtt;box10pos=434;box10seq=tatact
YPK_1131	ureA	urease subunit gamma UreA, with UreB and UreC catalyzes the hydrolysis of urea into ammonia and carbon dioxide; nickel metalloenzyme; accessory proteins UreD, UreE, UreF, and UreG are necessary for assembly of the metallocenter	1270231	1270533	+	TSS	1269104	1269604	1269424	1.97	rpoD	promoter=rpoD;box35pos=286;box35seq=ttgccg;box10pos=308;box10seq=taagat
YPK_1132	ureB	urease subunit beta ureases catalyze the hydrolysis of urea into ammonia and carbon dioxide; in Helicobacter pylori and Yersinia enterocolitica the ammonia released plays a key role in bacterial survival by neutralizing acids when colonizing the gastric mucosa; the holoenzym	1270544	1271020	+	OPeron	1269731	1270231	1270043	1.92	rpoE	promoter=rpoE;box35pos=281;box35seq=aaataa;box10pos=301;box10seq=tctat
YPK_1132	ureB	urease subunit beta ureases catalyze the hydrolysis of urea into ammonia and carbon dioxide; in Helicobacter pylori and Yersinia enterocolitica the ammonia released plays a key role in bacterial survival by neutralizing acids when colonizing the gastric mucosa; the holoenzym	1270544	1271020	+	OPeron	1269731	1270231	1270022	1.94	rpoS	promoter=rpoS;box35pos=256;box35seq=ctgaaa;box10pos=278;box10seq=tataaa
YPK_1132	ureB	urease subunit beta ureases catalyze the hydrolysis of urea into ammonia and carbon dioxide; in Helicobacter pylori and Yersinia enterocolitica the ammonia released plays a key role in bacterial survival by neutralizing acids when colonizing the gastric mucosa; the holoenzym	1270544	1271020	+	OPeron	1269731	1270231	1269954	1.96	rpoD	promoter=rpoD;box35pos=190;box35seq=gtttaa;box10pos=211;box10seq=taaaga
YPK_1133	ureC	urease subunit alpha ureases catalyze the hydrolysis of urea into ammonia and carbon dioxide; in Yersinia enterocolitica the ammonia released plays a key role in bacterial survival by neutralizing acids when colonizing the gastric mucosa; the holoenzyme is composed of 3 ureC	1271110	1272828	+	OPeron	1269731	1270231	1270043	1.92	rpoE	promoter=rpoE;box35pos=281;box35seq=aaataa;box10pos=301;box10seq=tctat
YPK_1133	ureC	urease subunit alpha ureases catalyze the hydrolysis of urea into ammonia and carbon dioxide; in Yersinia enterocolitica the ammonia released plays a key role in bacterial survival by neutralizing acids when colonizing the gastric mucosa; the holoenzyme is composed of 3 ureC	1271110	1272828	+	OPeron	1269731	1270231	1270022	1.94	rpoS	promoter=rpoS;box35pos=256;box35seq=ctgaaa;box10pos=278;box10seq=tataaa
YPK_1133	ureC	urease subunit alpha ureases catalyze the hydrolysis of urea into ammonia and carbon dioxide; in Yersinia enterocolitica the ammonia released plays a key role in bacterial survival by neutralizing acids when colonizing the gastric mucosa; the holoenzyme is composed of 3 ureC	1271110	1272828	+	OPeron	1269731	1270231	1269954	1.96	rpoD	promoter=rpoD;box35pos=190;box35seq=gtttaa;box10pos=211;box10seq=taaaga
YPK_1136	YPK_1136	urease accessory protein UreG TIGRFAM: urease accessory protein UreG~PFAM: cobalamin synthesis protein P47K~KEGG: ypm:YP_2471 urease accessory protein	1274654	1275316	+	OPeron	1274154	1274654	1274384	1.91	rpoD	promoter=rpoD;box35pos=195;box35seq=ttgatg;box10pos=218;box10seq=tacaca
YPK_1153	YPK_1153	hypothetical protein KEGG: ypi:YpsIP31758_1100 hypothetical protein	1290563	1290805	+	SGene	1290063	1290563	1290458	1.94	rpoE	promoter=rpoE;box35pos=365;box35seq=aaacga;box10pos=384;box10seq=tcaaa
YPK_1153	YPK_1153	hypothetical protein KEGG: ypi:YpsIP31758_1100 hypothetical protein	1290563	1290805	+	SGene	1290063	1290563	1290422	1.95	rpoS	promoter=rpoS;box35pos=324;box35seq=ttaacg;box10pos=346;box10seq=taagtt
YPK_1153	YPK_1153	hypothetical protein KEGG: ypi:YpsIP31758_1100 hypothetical protein	1290563	1290805	+	SGene	1290063	1290563	1290467	1.96	rpoD	promoter=rpoD;box35pos=371;box35seq=cctgta;box10pos=392;box10seq=taatct
YPK_1161	YPK_1161	hypothetical protein KEGG: ypi:YpsIP31758_1110 hypothetical protein	1300951	1301079	+	OPeron	1300161	1300661	1300374	1.98	rpoE	promoter=rpoE;box35pos=184;box35seq=aaaaaa;box10pos=203;box10seq=tcaaa
YPK_1161	YPK_1161	hypothetical protein KEGG: ypi:YpsIP31758_1110 hypothetical protein	1300951	1301079	+	OPeron	1300161	1300661	1300582	1.96	rpoS	promoter=rpoS;box35pos=382;box35seq=ctggca;box10pos=408;box10seq=taaaat
YPK_1161	YPK_1161	hypothetical protein KEGG: ypi:YpsIP31758_1110 hypothetical protein	1300951	1301079	+	OPeron	1300161	1300661	1300604	1.96	rpoD	promoter=rpoD;box35pos=407;box35seq=gtaaaa;box10pos=431;box10seq=taaaat
YPK_1173	YPK_1173	uracil-DNA glycosylase Excises uracil residues from the DNA which can arise as a result of misincorporation of dUMP residues by DNA polymerase or due to deamination of cytosine	1310736	1311422	-	TSS	1311455	1311955	1312110	1.92	rpoE	promoter=rpoE;box35pos=313;box35seq=gcacca;box10pos=334;box10seq=tcaaa
YPK_1173	YPK_1173	uracil-DNA glycosylase Excises uracil residues from the DNA which can arise as a result of misincorporation of dUMP residues by DNA polymerase or due to deamination of cytosine	1310736	1311422	-	TSS	1311455	1311955	1312213	1.95	rpoS	promoter=rpoS;box35pos=203;box35seq=tcaaag;box10pos=229;box10seq=tatata
YPK_1173	YPK_1173	uracil-DNA glycosylase Excises uracil residues from the DNA which can arise as a result of misincorporation of dUMP residues by DNA polymerase or due to deamination of cytosine	1310736	1311422	-	TSS	1311455	1311955	1312171	1.96	rpoD	promoter=rpoD;box35pos=251;box35seq=ttggtt;box10pos=272;box10seq=gataat
YPK_1174	YPK_1174	autonomous glycyl radical cofactor GrcA stress-induced glycyl radical protein that can replace an oxidatively damaged pyruvate formate-lyase subunit	1311774	1312157	+	TSS	1311055	1311555	1311455	1.94	rpoE	promoter=rpoE;box35pos=369;box35seq=aaacac;box10pos=389;box10seq=gcaaa
YPK_1174	YPK_1174	autonomous glycyl radical cofactor GrcA stress-induced glycyl radical protein that can replace an oxidatively damaged pyruvate formate-lyase subunit	1311774	1312157	+	TSS	1311055	1311555	1311438	1.91	rpoS	promoter=rpoS;box35pos=345;box35seq=gtgcca;box10pos=370;box10seq=aacact
YPK_1174	YPK_1174	autonomous glycyl radical cofactor GrcA stress-induced glycyl radical protein that can replace an oxidatively damaged pyruvate formate-lyase subunit	1311774	1312157	+	TSS	1311055	1311555	1311435	1.93	rpoD	promoter=rpoD;box35pos=345;box35seq=gtgcca;box10pos=368;box10seq=taaaca
YPK_1176	YPK_1176	hypothetical protein KEGG: ypi:YpsIP31758_1124 hypothetical protein	1313291	1313389	+	OPeron	1311836	1312336	1312190	1.96	rpoE	promoter=rpoE;box35pos=320;box35seq=taattc;box10pos=343;box10seq=tcata
YPK_1176	YPK_1176	hypothetical protein KEGG: ypi:YpsIP31758_1124 hypothetical protein	1313291	1313389	+	OPeron	1311836	1312336	1312250	1.93	rpoS	promoter=rpoS;box35pos=378;box35seq=tcggtc;box10pos=401;box10seq=aaattt
YPK_1176	YPK_1176	hypothetical protein KEGG: ypi:YpsIP31758_1124 hypothetical protein	1313291	1313389	+	OPeron	1311836	1312336	1312063	1.96	rpoD	promoter=rpoD;box35pos=191;box35seq=gatgca;box10pos=215;box10seq=tatcct
YPK_1180	YPK_1180	methyltransferase small PFAM: methyltransferase small; Methyltransferase type 12~KEGG: ypm:YP_2513 SAM-dependent methyltransferase	1315728	1316486	+	SGene	1315228	1315728	1315641	1.96	rpoS	promoter=rpoS;box35pos=376;box35seq=ctgcta;box10pos=400;box10seq=catact
YPK_1180	YPK_1180	methyltransferase small PFAM: methyltransferase small; Methyltransferase type 12~KEGG: ypm:YP_2513 SAM-dependent methyltransferase	1315728	1316486	+	SGene	1315228	1315728	1315604	1.94	rpoD	promoter=rpoD;box35pos=339;box35seq=ttccct;box10pos=364;box10seq=taatat
YPK_1182	YPK_1182	RNA polymerase sigma factor RpoE Member of the extracytOPeronlasmic function sigma factors which are active under specific conditions; binds with the catalytic core of RNA polymerase to produce the holoenzyme and directs bacterial core RNA polymerase to specific promoter elements to initiate	1318594	1319169	+	TSS	1318017	1318517	1318461	1.92	rpoE	promoter=rpoE;box35pos=409;box35seq=gaaaaa;box10pos=432;box10seq=tctga
YPK_1182	YPK_1182	RNA polymerase sigma factor RpoE Member of the extracytOPeronlasmic function sigma factors which are active under specific conditions; binds with the catalytic core of RNA polymerase to produce the holoenzyme and directs bacterial core RNA polymerase to specific promoter elements to initiate	1318594	1319169	+	TSS	1318017	1318517	1318466	1.9	rpoS	promoter=rpoS;box35pos=415;box35seq=gctatg;box10pos=438;box10seq=taatat
YPK_1182	YPK_1182	RNA polymerase sigma factor RpoE Member of the extracytOPeronlasmic function sigma factors which are active under specific conditions; binds with the catalytic core of RNA polymerase to produce the holoenzyme and directs bacterial core RNA polymerase to specific promoter elements to initiate	1318594	1319169	+	TSS	1318017	1318517	1318467	1.93	rpoD	promoter=rpoD;box35pos=415;box35seq=gctatg;box10pos=438;box10seq=taatat
YPK_1194	YPK_1194	iron-sulfur cluster-binding protein KEGG: ypi:YpsIP31758_1141 iron-sulfur cluster-binding protein	1329491	1329676	-	SGene	1329676	1330176	1330248	1.94	rpoE	promoter=rpoE;box35pos=392;box35seq=gcacat;box10pos=417;box10seq=gcaaa
YPK_1194	YPK_1194	iron-sulfur cluster-binding protein KEGG: ypi:YpsIP31758_1141 iron-sulfur cluster-binding protein	1329491	1329676	-	SGene	1329676	1330176	1330451	1.95	rpoS	promoter=rpoS;box35pos=188;box35seq=cctaag;box10pos=212;box10seq=aacaca
YPK_1194	YPK_1194	iron-sulfur cluster-binding protein KEGG: ypi:YpsIP31758_1141 iron-sulfur cluster-binding protein	1329491	1329676	-	SGene	1329676	1330176	1330430	1.96	rpoD	promoter=rpoD;box35pos=208;box35seq=ccgcaa;box10pos=234;box10seq=taaaat
YPK_1202	YPK_1202	VRR-NUC domain-containing protein PFAM: VRR-NUC domain protein~KEGG: ckl:CKL_2657 hypothetical protein	1334572	1334841	-	OPeron	1337141	1337641	1337907	1.91	rpoS	promoter=rpoS;box35pos=197;box35seq=gttaac;box10pos=221;box10seq=taattt
YPK_1206	YPK_1206	hypothetical protein KEGG: nme:NMB0907 hypothetical protein	1338075	1338452	-	OPeron	1341113	1341613	1341860	1.92	rpoE	promoter=rpoE;box35pos=220;box35seq=gaacat;box10pos=242;box10seq=tctta
YPK_1206	YPK_1206	hypothetical protein KEGG: nme:NMB0907 hypothetical protein	1338075	1338452	-	OPeron	1341113	1341613	1341712	1.94	rpoS	promoter=rpoS;box35pos=361;box35seq=ttgctc;box10pos=388;box10seq=tatttt
YPK_1206	YPK_1206	hypothetical protein KEGG: nme:NMB0907 hypothetical protein	1338075	1338452	-	OPeron	1341113	1341613	1341700	1.97	rpoD	promoter=rpoD;box35pos=376;box35seq=catatt;box10pos=402;box10seq=taataa
YPK_1213	YPK_1213	hypothetical protein	1345022	1345234	+	OPeron	1344522	1345022	1344899	1.98	rpoE	promoter=rpoE;box35pos=340;box35seq=taacta;box10pos=365;box10seq=acaca
YPK_1213	YPK_1213	hypothetical protein	1345022	1345234	+	OPeron	1344522	1345022	1344909	1.95	rpoS	promoter=rpoS;box35pos=350;box35seq=tagata;box10pos=374;box10seq=cataca
YPK_1213	YPK_1213	hypothetical protein	1345022	1345234	+	OPeron	1344522	1345022	1344801	1.97	rpoD	promoter=rpoD;box35pos=240;box35seq=ttagca;box10pos=267;box10seq=taacct
YPK_1232	YPK_1232	hypothetical protein	1358840	1359379	+	OPeron	1351447	1351947	1351755	1.95	rpoE	promoter=rpoE;box35pos=276;box35seq=gactct;box10pos=297;box10seq=gcaaa
YPK_1232	YPK_1232	hypothetical protein	1358840	1359379	+	OPeron	1351447	1351947	1351768	1.91	rpoS	promoter=rpoS;box35pos=280;box35seq=cttaag;box10pos=308;box10seq=aatatt
YPK_1232	YPK_1232	hypothetical protein	1358840	1359379	+	OPeron	1351447	1351947	1351758	1.92	rpoD	promoter=rpoD;box35pos=270;box35seq=cataat;box10pos=298;box10seq=caaaat
YPK_1234	YPK_1234	hypothetical protein	1360918	1361358	+	OPeron	1351447	1351947	1351755	1.95	rpoE	promoter=rpoE;box35pos=276;box35seq=gactct;box10pos=297;box10seq=gcaaa
YPK_1234	YPK_1234	hypothetical protein	1360918	1361358	+	OPeron	1351447	1351947	1351768	1.91	rpoS	promoter=rpoS;box35pos=280;box35seq=cttaag;box10pos=308;box10seq=aatatt
YPK_1234	YPK_1234	hypothetical protein	1360918	1361358	+	OPeron	1351447	1351947	1351758	1.92	rpoD	promoter=rpoD;box35pos=270;box35seq=cataat;box10pos=298;box10seq=caaaat
YPK_1236	YPK_1236	hypothetical protein KEGG: ypi:YpsIP31758_2939 hypothetical protein	1361899	1363470	+	OPeron	1361399	1361899	1361680	1.92	rpoE	promoter=rpoE;box35pos=251;box35seq=gaatat;box10pos=270;box10seq=tcaga
YPK_1236	YPK_1236	hypothetical protein KEGG: ypi:YpsIP31758_2939 hypothetical protein	1361899	1363470	+	OPeron	1361399	1361899	1361655	1.91	rpoD	promoter=rpoD;box35pos=216;box35seq=ttgaaa;box10pos=244;box10seq=gatgat
YPK_1239	YPK_1239	hypothetical protein KEGG: ypi:YpsIP31758_2936 hypothetical protein	1364287	1365126	+	OPeron	1361399	1361899	1361680	1.92	rpoE	promoter=rpoE;box35pos=251;box35seq=gaatat;box10pos=270;box10seq=tcaga
YPK_1239	YPK_1239	hypothetical protein KEGG: ypi:YpsIP31758_2936 hypothetical protein	1364287	1365126	+	OPeron	1361399	1361899	1361655	1.91	rpoD	promoter=rpoD;box35pos=216;box35seq=ttgaaa;box10pos=244;box10seq=gatgat
YPK_1244	YPK_1244	hypothetical protein	1369205	1369426	+	OPeron	1361399	1361899	1361680	1.92	rpoE	promoter=rpoE;box35pos=251;box35seq=gaatat;box10pos=270;box10seq=tcaga
YPK_1244	YPK_1244	hypothetical protein	1369205	1369426	+	OPeron	1361399	1361899	1361655	1.91	rpoD	promoter=rpoD;box35pos=216;box35seq=ttgaaa;box10pos=244;box10seq=gatgat
YPK_1259	YPK_1259	two component, sigma54 specific, Fis family transcriptional regulator PFAM: response regulator receiver; sigma-54 factor interaction domain-containing protein; ATPase associated with various cellular activities AAA_5~SMART: AAA ATPase~KEGG: ypm:YP_2543 two-component system response regulator	1387322	1388659	+	OPeron	1384352	1384852	1384615	1.94	rpoE	promoter=rpoE;box35pos=230;box35seq=gaaaca;box10pos=252;box10seq=tctga
YPK_1259	YPK_1259	two component, sigma54 specific, Fis family transcriptional regulator PFAM: response regulator receiver; sigma-54 factor interaction domain-containing protein; ATPase associated with various cellular activities AAA_5~SMART: AAA ATPase~KEGG: ypm:YP_2543 two-component system response regulator	1387322	1388659	+	OPeron	1384352	1384852	1384641	1.94	rpoS	promoter=rpoS;box35pos=253;box35seq=ctgata;box10pos=276;box10seq=tatact
YPK_1259	YPK_1259	two component, sigma54 specific, Fis family transcriptional regulator PFAM: response regulator receiver; sigma-54 factor interaction domain-containing protein; ATPase associated with various cellular activities AAA_5~SMART: AAA ATPase~KEGG: ypm:YP_2543 two-component system response regulator	1387322	1388659	+	OPeron	1384352	1384852	1384670	1.96	rpoD	promoter=rpoD;box35pos=276;box35seq=tatact;box10pos=304;box10seq=taataa
YPK_1262	YPK_1262	nitrogen regulatory protein P-II 1 indirectly regulates nitrogen metabolism; at high nitrogen levels P-II prevents the phosphorylation of NR-I, the transcriptional activator of the glutamine synthetase gene (glnA); at low nitrogen levels P-II is uridylylated to form PII-UMP and interacts w	1390456	1390794	+	OPeron	1384352	1384852	1384615	1.94	rpoE	promoter=rpoE;box35pos=230;box35seq=gaaaca;box10pos=252;box10seq=tctga
YPK_1262	YPK_1262	nitrogen regulatory protein P-II 1 indirectly regulates nitrogen metabolism; at high nitrogen levels P-II prevents the phosphorylation of NR-I, the transcriptional activator of the glutamine synthetase gene (glnA); at low nitrogen levels P-II is uridylylated to form PII-UMP and interacts w	1390456	1390794	+	OPeron	1384352	1384852	1384641	1.94	rpoS	promoter=rpoS;box35pos=253;box35seq=ctgata;box10pos=276;box10seq=tatact
YPK_1262	YPK_1262	nitrogen regulatory protein P-II 1 indirectly regulates nitrogen metabolism; at high nitrogen levels P-II prevents the phosphorylation of NR-I, the transcriptional activator of the glutamine synthetase gene (glnA); at low nitrogen levels P-II is uridylylated to form PII-UMP and interacts w	1390456	1390794	+	OPeron	1384352	1384852	1384670	1.96	rpoD	promoter=rpoD;box35pos=276;box35seq=tatact;box10pos=304;box10seq=taataa
YPK_1265	glyA	serine hydroxymethyltransferase catalyzes the reaction of glycine with 5,10-methylenetetrahydrofolate to form L-serine and tetrahydrofolate	1394116	1395369	+	TSS	1393365	1393865	1393695	1.97	rpoE	promoter=rpoE;box35pos=298;box35seq=taattt;box10pos=319;box10seq=tcgta
YPK_1265	glyA	serine hydroxymethyltransferase catalyzes the reaction of glycine with 5,10-methylenetetrahydrofolate to form L-serine and tetrahydrofolate	1394116	1395369	+	TSS	1393365	1393865	1393676	1.96	rpoS	promoter=rpoS;box35pos=277;box35seq=tttctc;box10pos=298;box10seq=taattt
YPK_1265	glyA	serine hydroxymethyltransferase catalyzes the reaction of glycine with 5,10-methylenetetrahydrofolate to form L-serine and tetrahydrofolate	1394116	1395369	+	TSS	1393365	1393865	1393741	1.96	rpoD	promoter=rpoD;box35pos=340;box35seq=ctgaag;box10pos=364;box10seq=gaatat
YPK_1268	YPK_1268	virulence-related outer membrane protein PFAM: virulence-related outer membrane protein~KEGG: ypi:YpsIP31758_1160 attachment invasion locus protein	1395821	1396360	+	TSS	1395262	1395762	1395506	1.92	rpoE	promoter=rpoE;box35pos=212;box35seq=caactc;box10pos=233;box10seq=gcgaa
YPK_1268	YPK_1268	virulence-related outer membrane protein PFAM: virulence-related outer membrane protein~KEGG: ypi:YpsIP31758_1160 attachment invasion locus protein	1395821	1396360	+	TSS	1395262	1395762	1395483	1.91	rpoD	promoter=rpoD;box35pos=183;box35seq=gcgact;box10pos=209;box10seq=tatcaa
YPK_1271	YPK_1271	hypothetical protein PFAM: protein of unknown function DUF1007~KEGG: ypi:YpsIP31758_1163 hypothetical protein	1399531	1400205	+	OPeron	1399031	1399531	1399480	1.9	rpoS	promoter=rpoS;box35pos=416;box35seq=ttcatt;box10pos=438;box10seq=tagttt
YPK_1271	YPK_1271	hypothetical protein PFAM: protein of unknown function DUF1007~KEGG: ypi:YpsIP31758_1163 hypothetical protein	1399531	1400205	+	OPeron	1399031	1399531	1399402	1.93	rpoD	promoter=rpoD;box35pos=336;box35seq=cttaaa;box10pos=359;box10seq=tataaa
YPK_1277	YPK_1277	scaffold protein TIGRFAM: FeS cluster assembly scaffold IscU~PFAM: nitrogen-fixing NifU domain protein~KEGG: ypi:YpsIP31758_1169 FeS cluster assembly scaffold IscU	1404976	1405362	+	OPeron	1402605	1403105	1403053	1.94	rpoE	promoter=rpoE;box35pos=418;box35seq=tcaatt;box10pos=437;box10seq=tctaa
YPK_1277	YPK_1277	scaffold protein TIGRFAM: FeS cluster assembly scaffold IscU~PFAM: nitrogen-fixing NifU domain protein~KEGG: ypi:YpsIP31758_1169 FeS cluster assembly scaffold IscU	1404976	1405362	+	OPeron	1402605	1403105	1403052	1.94	rpoS	promoter=rpoS;box35pos=412;box35seq=cttata;box10pos=434;box10seq=aattct
YPK_1277	YPK_1277	scaffold protein TIGRFAM: FeS cluster assembly scaffold IscU~PFAM: nitrogen-fixing NifU domain protein~KEGG: ypi:YpsIP31758_1169 FeS cluster assembly scaffold IscU	1404976	1405362	+	OPeron	1402605	1403105	1403044	1.94	rpoD	promoter=rpoD;box35pos=405;box35seq=ttaatg;box10pos=427;box10seq=tataat
YPK_1285	YPK_1285	enhanced serine sensitivity protein SseB enhances serine sensitivity caused by inhibition of homoserine dehydrogenase I	1410834	1411751	+	SGene	1410334	1410834	1410543	1.91	rpoD	promoter=rpoD;box35pos=174;box35seq=ttccat;box10pos=197;box10seq=taactt
YPK_1296	YPK_1296	outer membrane protein assembly complex subunit YfgL with YaeT, YfiO, and NlpB forms a complex involved in outer membrane protein biogenesis	1425841	1427022	+	OPeron	1423406	1423906	1423742	1.92	rpoE	promoter=rpoE;box35pos=302;box35seq=gcaatc;box10pos=325;box10seq=tcaaa
YPK_1296	YPK_1296	outer membrane protein assembly complex subunit YfgL with YaeT, YfiO, and NlpB forms a complex involved in outer membrane protein biogenesis	1425841	1427022	+	OPeron	1423406	1423906	1423830	1.94	rpoS	promoter=rpoS;box35pos=383;box35seq=gtgcta;box10pos=411;box10seq=tagagt
YPK_1296	YPK_1296	outer membrane protein assembly complex subunit YfgL with YaeT, YfiO, and NlpB forms a complex involved in outer membrane protein biogenesis	1425841	1427022	+	OPeron	1423406	1423906	1423794	1.94	rpoD	promoter=rpoD;box35pos=354;box35seq=tttata;box10pos=377;box10seq=tatatt
YPK_1316	YPK_1316	insertion element protein PFAM: Insertion element protein~KEGG: ypi:YpsIP31758_0740 IS1 family transposase orfA	1447960	1448121	+	SGene	1447460	1447960	1447702	1.98	rpoE	promoter=rpoE;box35pos=208;box35seq=aaaaat;box10pos=231;box10seq=tctta
YPK_1316	YPK_1316	insertion element protein PFAM: Insertion element protein~KEGG: ypi:YpsIP31758_0740 IS1 family transposase orfA	1447960	1448121	+	SGene	1447460	1447960	1447787	1.96	rpoS	promoter=rpoS;box35pos=294;box35seq=tttaat;box10pos=316;box10seq=cacaat
YPK_1316	YPK_1316	insertion element protein PFAM: Insertion element protein~KEGG: ypi:YpsIP31758_0740 IS1 family transposase orfA	1447960	1448121	+	SGene	1447460	1447960	1447818	1.97	rpoD	promoter=rpoD;box35pos=323;box35seq=ttctta;box10pos=346;box10seq=gataat
YPK_1323	YPK_1323	inhibitor of vertebrate lysozyme PFAM: Inhibitor of vertebrate lysozyme~KEGG: yps:YPTB2822 hypothetical protein	1452474	1452983	+	TSS	1451877	1452377	1452089	1.92	rpoS	promoter=rpoS;box35pos=173;box35seq=ttgata;box10pos=199;box10seq=tattta
YPK_1323	YPK_1323	inhibitor of vertebrate lysozyme PFAM: Inhibitor of vertebrate lysozyme~KEGG: yps:YPTB2822 hypothetical protein	1452474	1452983	+	TSS	1451877	1452377	1452326	1.92	rpoD	promoter=rpoD;box35pos=412;box35seq=ttgtca;box10pos=436;box10seq=taaaat
YPK_1346	YPK_1346	phosphate ABC transporter permease TIGRFAM: phosphate ABC transporter, inner membrane subunit PstA~PFAM: binding-protein-dependent transport systems inner membrane component~KEGG: ypi:YpsIP31758_1229 phosphate ABC transporter, permease protein PstA	1486040	1487752	+	OPeron	1483381	1483881	1483654	1.97	rpoE	promoter=rpoE;box35pos=242;box35seq=tcatta;box10pos=262;box10seq=gcaaa
YPK_1346	YPK_1346	phosphate ABC transporter permease TIGRFAM: phosphate ABC transporter, inner membrane subunit PstA~PFAM: binding-protein-dependent transport systems inner membrane component~KEGG: ypi:YpsIP31758_1229 phosphate ABC transporter, permease protein PstA	1486040	1487752	+	OPeron	1483381	1483881	1483667	1.95	rpoS	promoter=rpoS;box35pos=249;box35seq=ttaaca;box10pos=273;box10seq=aaaact
YPK_1346	YPK_1346	phosphate ABC transporter permease TIGRFAM: phosphate ABC transporter, inner membrane subunit PstA~PFAM: binding-protein-dependent transport systems inner membrane component~KEGG: ypi:YpsIP31758_1229 phosphate ABC transporter, permease protein PstA	1486040	1487752	+	OPeron	1483381	1483881	1483643	1.95	rpoD	promoter=rpoD;box35pos=223;box35seq=caaaaa;box10pos=250;box10seq=taacat
YPK_1354	YPK_1354	DNA replication initiation factor controls initiation of DNA replication by inhibiting re-initiation of replication, promotes hydrolysis of DnaA-bound ATP	1495395	1496102	+	TSS	1494868	1495368	1495279	1.94	rpoD	promoter=rpoD;box35pos=376;box35seq=ttgcat;box10pos=399;box10seq=tataaa
YPK_1368	YPK_1368	hypothetical protein PFAM: GCN5-related N-acetyltransferase; protein of unknown function DUF699 ATPase putative~KEGG: yps:YPTB2778 putative acetyltransferase	1507209	1509260	+	OPeron	1505292	1505792	1505652	1.96	rpoD	promoter=rpoD;box35pos=327;box35seq=gcggtg;box10pos=348;box10seq=caaact
YPK_1374	YPK_1374	hypothetical protein KEGG: ypi:YpsIP31758_1257 tetratricOPeroneptide repeat protein	1512173	1512646	-	SGene	1512646	1513146	1513394	1.97	rpoE	promoter=rpoE;box35pos=216;box35seq=aaaata;box10pos=241;box10seq=tcgtt
YPK_1374	YPK_1374	hypothetical protein KEGG: ypi:YpsIP31758_1257 tetratricOPeroneptide repeat protein	1512173	1512646	-	SGene	1512646	1513146	1513307	1.95	rpoS	promoter=rpoS;box35pos=303;box35seq=gttaaa;box10pos=326;box10seq=taaagt
YPK_1374	YPK_1374	hypothetical protein KEGG: ypi:YpsIP31758_1257 tetratricOPeroneptide repeat protein	1512173	1512646	-	SGene	1512646	1513146	1513323	1.96	rpoD	promoter=rpoD;box35pos=283;box35seq=tttcat;box10pos=311;box10seq=tatgtt
YPK_1379	YPK_1379	radical SAM domain-containing protein PFAM: Radical SAM domain protein~KEGG: yps:YPTB2768 putative sulfatase modifier protein	1519180	1520355	+	OPeron	1516950	1517450	1517310	1.97	rpoE	promoter=rpoE;box35pos=326;box35seq=taattg;box10pos=349;box10seq=tctat
YPK_1379	YPK_1379	radical SAM domain-containing protein PFAM: Radical SAM domain protein~KEGG: yps:YPTB2768 putative sulfatase modifier protein	1519180	1520355	+	OPeron	1516950	1517450	1517370	1.96	rpoS	promoter=rpoS;box35pos=385;box35seq=tttaaa;box10pos=407;box10seq=tattca
YPK_1379	YPK_1379	radical SAM domain-containing protein PFAM: Radical SAM domain protein~KEGG: yps:YPTB2768 putative sulfatase modifier protein	1519180	1520355	+	OPeron	1516950	1517450	1517313	1.97	rpoD	promoter=rpoD;box35pos=329;box35seq=ttgtag;box10pos=351;box10seq=tatatt
YPK_1383	YPK_1383	hypothetical protein KEGG: ypi:YpsIP31758_1269 hypothetical protein	1526300	1526578	+	SGene	1525800	1526300	1526099	1.92	rpoE	promoter=rpoE;box35pos=263;box35seq=aaaagc;box10pos=288;box10seq=tcaga
YPK_1383	YPK_1383	hypothetical protein KEGG: ypi:YpsIP31758_1269 hypothetical protein	1526300	1526578	+	SGene	1525800	1526300	1526135	1.9	rpoS	promoter=rpoS;box35pos=295;box35seq=gagaag;box10pos=322;box10seq=tatttt
YPK_1383	YPK_1383	hypothetical protein KEGG: ypi:YpsIP31758_1269 hypothetical protein	1526300	1526578	+	SGene	1525800	1526300	1526161	1.94	rpoD	promoter=rpoD;box35pos=326;box35seq=tttctg;box10pos=349;box10seq=tagact
YPK_1386	YPK_1386	assembly protein for periplasmic nitrate reductase PFAM: NapD family protein~KEGG: ypi:YpsIP31758_1272 NapD protein	1528546	1528812	+	OPeron	1527553	1528053	1527786	1.98	rpoE	promoter=rpoE;box35pos=197;box35seq=taatta;box10pos=218;box10seq=tcgtt
YPK_1386	YPK_1386	assembly protein for periplasmic nitrate reductase PFAM: NapD family protein~KEGG: ypi:YpsIP31758_1272 NapD protein	1528546	1528812	+	OPeron	1527553	1528053	1527786	1.96	rpoS	promoter=rpoS;box35pos=194;box35seq=tggtaa;box10pos=222;box10seq=tatata
YPK_1386	YPK_1386	assembly protein for periplasmic nitrate reductase PFAM: NapD family protein~KEGG: ypi:YpsIP31758_1272 NapD protein	1528546	1528812	+	OPeron	1527553	1528053	1527973	1.97	rpoD	promoter=rpoD;box35pos=387;box35seq=tttaat;box10pos=408;box10seq=tattat
YPK_1389	YPK_1389	cytochrome c-type protein NapC with NapABDFGH functions as a nitrate reductase; NapC functions as an electron shuttle between NapAB and NapGH or quinone	1531879	1532478	+	OPeron	1530884	1531384	1531317	1.94	rpoE	promoter=rpoE;box35pos=401;box35seq=gaacgg;box10pos=423;box10seq=tcaca
YPK_1389	YPK_1389	cytochrome c-type protein NapC with NapABDFGH functions as a nitrate reductase; NapC functions as an electron shuttle between NapAB and NapGH or quinone	1531879	1532478	+	OPeron	1530884	1531384	1531290	1.9	rpoD	promoter=rpoD;box35pos=372;box35seq=ctgact;box10pos=394;box10seq=gaaact
YPK_1395	YPK_1395	hypothetical protein KEGG: ypi:YpsIP31758_1287 hypothetical protein	1538445	1538861	+	SGene	1537945	1538445	1538235	1.97	rpoE	promoter=rpoE;box35pos=259;box35seq=acagtt;box10pos=279;box10seq=gcaga
YPK_1395	YPK_1395	hypothetical protein KEGG: ypi:YpsIP31758_1287 hypothetical protein	1538445	1538861	+	SGene	1537945	1538445	1538205	1.96	rpoS	promoter=rpoS;box35pos=224;box35seq=tagata;box10pos=247;box10seq=cacact
YPK_1395	YPK_1395	hypothetical protein KEGG: ypi:YpsIP31758_1287 hypothetical protein	1538445	1538861	+	SGene	1537945	1538445	1538313	1.96	rpoD	promoter=rpoD;box35pos=335;box35seq=tttttt;box10pos=356;box10seq=gataaa
YPK_1400	YPK_1400	dihydrodipicolinate synthetase PFAM: dihydrodipicolinate synthetase~KEGG: ypm:YP_2647 probable N-acetylneuraminate lyase	1544299	1545192	-	SGene	1545192	1545692	1545834	1.96	rpoE	promoter=rpoE;box35pos=325;box35seq=aaaatc;box10pos=347;box10seq=gctaa
YPK_1400	YPK_1400	dihydrodipicolinate synthetase PFAM: dihydrodipicolinate synthetase~KEGG: ypm:YP_2647 probable N-acetylneuraminate lyase	1544299	1545192	-	SGene	1545192	1545692	1545856	1.91	rpoD	promoter=rpoD;box35pos=302;box35seq=tagccg;box10pos=324;box10seq=taaaat
YPK_1403	YPK_1403	hypothetical protein KEGG: ypm:YP_2645 hypothetical protein	1546281	1547252	-	SGene	1547252	1547752	1547993	1.94	rpoS	promoter=rpoS;box35pos=220;box35seq=tatcca;box10pos=246;box10seq=taagat
YPK_1403	YPK_1403	hypothetical protein KEGG: ypm:YP_2645 hypothetical protein	1546281	1547252	-	SGene	1547252	1547752	1548026	1.95	rpoD	promoter=rpoD;box35pos=193;box35seq=gagttt;box10pos=214;box10seq=catagt
YPK_1407	YPK_1407	putative sialic acid transporter PFAM: General substrate transporter; major facilitator superfamily MFS_1~KEGG: ypi:YpsIP31758_1298 transporter, major facilitator family	1550617	1552149	+	TSS	1549933	1550433	1550260	1.95	rpoE	promoter=rpoE;box35pos=294;box35seq=tcactt;box10pos=316;box10seq=tcgaa
YPK_1407	YPK_1407	putative sialic acid transporter PFAM: General substrate transporter; major facilitator superfamily MFS_1~KEGG: ypi:YpsIP31758_1298 transporter, major facilitator family	1550617	1552149	+	TSS	1549933	1550433	1550317	1.92	rpoS	promoter=rpoS;box35pos=346;box35seq=gtgctt;box10pos=371;box10seq=tatcct
YPK_1407	YPK_1407	putative sialic acid transporter PFAM: General substrate transporter; major facilitator superfamily MFS_1~KEGG: ypi:YpsIP31758_1298 transporter, major facilitator family	1550617	1552149	+	TSS	1549933	1550433	1550301	1.94	rpoD	promoter=rpoD;box35pos=333;box35seq=tagact;box10pos=356;box10seq=tatttt
YPK_1409	YPK_1409	sulfate/thiosulfate transporter subunit TIGRFAM: sulfate ABC transporter, inner membrane subunit; sulfate ABC transporter, inner membrane subunit CysT~PFAM: binding-protein-dependent transport systems inner membrane component~KEGG: ypm:YP_2638 sulfate transport system permease protein CysT	1553519	1554352	+	OPeron	1551982	1552482	1552417	1.95	rpoE	promoter=rpoE;box35pos=401;box35seq=ggtata;box10pos=424;box10seq=actga
YPK_1409	YPK_1409	sulfate/thiosulfate transporter subunit TIGRFAM: sulfate ABC transporter, inner membrane subunit; sulfate ABC transporter, inner membrane subunit CysT~PFAM: binding-protein-dependent transport systems inner membrane component~KEGG: ypm:YP_2638 sulfate transport system permease protein CysT	1553519	1554352	+	OPeron	1551982	1552482	1552289	1.95	rpoS	promoter=rpoS;box35pos=272;box35seq=ttttag;box10pos=294;box10seq=taaata
YPK_1409	YPK_1409	sulfate/thiosulfate transporter subunit TIGRFAM: sulfate ABC transporter, inner membrane subunit; sulfate ABC transporter, inner membrane subunit CysT~PFAM: binding-protein-dependent transport systems inner membrane component~KEGG: ypm:YP_2638 sulfate transport system permease protein CysT	1553519	1554352	+	OPeron	1551982	1552482	1552200	1.95	rpoD	promoter=rpoD;box35pos=181;box35seq=cagaat;box10pos=206;box10seq=tatttt
YPK_1417	YPK_1417	class I and II aminotransferase PFAM: aminotransferase class I and II~KEGG: yps:YPTB2726 putative aminotransferase	1563817	1564998	+	OPeron	1563317	1563817	1563613	1.98	rpoE	promoter=rpoE;box35pos=263;box35seq=gatata;box10pos=285;box10seq=actat
YPK_1417	YPK_1417	class I and II aminotransferase PFAM: aminotransferase class I and II~KEGG: yps:YPTB2726 putative aminotransferase	1563817	1564998	+	OPeron	1563317	1563817	1563662	1.96	rpoS	promoter=rpoS;box35pos=303;box35seq=taaaat;box10pos=331;box10seq=taatgt
YPK_1417	YPK_1417	class I and II aminotransferase PFAM: aminotransferase class I and II~KEGG: yps:YPTB2726 putative aminotransferase	1563817	1564998	+	OPeron	1563317	1563817	1563609	1.98	rpoD	promoter=rpoD;box35pos=253;box35seq=tttatg;box10pos=276;box10seq=taattt
YPK_1426	YPK_1426	PTS system glucose-specific transporter functions in phosphoenolpyruvate-(PEP)-dependent phosphotransferase (PTS) system; functions in the transport and phosphorylation of glucose	1575702	1576211	-	TSS	1576444	1576944	1577068	1.93	rpoS	promoter=rpoS;box35pos=336;box35seq=tttcag;box10pos=363;box10seq=aataat
YPK_1426	YPK_1426	PTS system glucose-specific transporter functions in phosphoenolpyruvate-(PEP)-dependent phosphotransferase (PTS) system; functions in the transport and phosphorylation of glucose	1575702	1576211	-	TSS	1576444	1576944	1577159	1.92	rpoD	promoter=rpoD;box35pos=251;box35seq=tttcaa;box10pos=273;box10seq=gatagt
YPK_1427	YPK_1427	phosphoenolpyruvate-protein phosphotransferase Phosphotransferase system, enzyme I; transfers the phosphoryl group from phosphoenolpyruvate (PEP) to the phosphoryl carrier protein; part of the phosphoenolpyruvate-dependent sugar phosphotransferase system (PTS), a major carbohydrate active-transport sy	1576260	1577987	-	OPeron	1578293	1578793	1578913	1.93	rpoE	promoter=rpoE;box35pos=348;box35seq=aaacgc;box10pos=369;box10seq=tcaaa
YPK_1427	YPK_1427	phosphoenolpyruvate-protein phosphotransferase Phosphotransferase system, enzyme I; transfers the phosphoryl group from phosphoenolpyruvate (PEP) to the phosphoryl carrier protein; part of the phosphoenolpyruvate-dependent sugar phosphotransferase system (PTS), a major carbohydrate active-transport sy	1576260	1577987	-	OPeron	1578293	1578793	1578874	1.94	rpoS	promoter=rpoS;box35pos=384;box35seq=gttaaa;box10pos=406;box10seq=taaaat
YPK_1427	YPK_1427	phosphoenolpyruvate-protein phosphotransferase Phosphotransferase system, enzyme I; transfers the phosphoryl group from phosphoenolpyruvate (PEP) to the phosphoryl carrier protein; part of the phosphoenolpyruvate-dependent sugar phosphotransferase system (PTS), a major carbohydrate active-transport sy	1576260	1577987	-	OPeron	1578293	1578793	1578894	1.97	rpoD	promoter=rpoD;box35pos=361;box35seq=ttcgcg;box10pos=386;box10seq=taaata
YPK_1428	YPK_1428	PTS system phosphohistidinOPeronrotein-hexose phosphotransferase Hpr TIGRFAM: phosphocarrier, HPr family~PFAM: phosphocarrier HPr protein~KEGG: ypi:YpsIP31758_1317 phosphocarrier, HPr family	1578036	1578293	-	TSS	1578327	1578827	1578981	1.93	rpoE	promoter=rpoE;box35pos=314;box35seq=aaacgc;box10pos=335;box10seq=tcaaa
YPK_1428	YPK_1428	PTS system phosphohistidinOPeronrotein-hexose phosphotransferase Hpr TIGRFAM: phosphocarrier, HPr family~PFAM: phosphocarrier HPr protein~KEGG: ypi:YpsIP31758_1317 phosphocarrier, HPr family	1578036	1578293	-	TSS	1578327	1578827	1578908	1.95	rpoS	promoter=rpoS;box35pos=383;box35seq=tttatg;box10pos=406;box10seq=tactcc
YPK_1428	YPK_1428	PTS system phosphohistidinOPeronrotein-hexose phosphotransferase Hpr TIGRFAM: phosphocarrier, HPr family~PFAM: phosphocarrier HPr protein~KEGG: ypi:YpsIP31758_1317 phosphocarrier, HPr family	1578036	1578293	-	TSS	1578327	1578827	1578962	1.97	rpoD	promoter=rpoD;box35pos=327;box35seq=ttcgcg;box10pos=352;box10seq=taaata
YPK_1431	YPK_1431	cell division protein ZipA interacts with cell division protein FitsZ and may be required to anchor septal ring structure	1580900	1581886	+	TSS	1580353	1580853	1580729	1.95	rpoE	promoter=rpoE;box35pos=346;box35seq=aatctt;box10pos=365;box10seq=tcata
YPK_1431	YPK_1431	cell division protein ZipA interacts with cell division protein FitsZ and may be required to anchor septal ring structure	1580900	1581886	+	TSS	1580353	1580853	1580740	1.95	rpoS	promoter=rpoS;box35pos=353;box35seq=ttgacc;box10pos=374;box10seq=tatgat
YPK_1431	YPK_1431	cell division protein ZipA interacts with cell division protein FitsZ and may be required to anchor septal ring structure	1580900	1581886	+	TSS	1580353	1580853	1580717	1.96	rpoD	promoter=rpoD;box35pos=324;box35seq=gtcata;box10pos=351;box10seq=tattga
YPK_1457	YPK_1457	hypothetical protein KEGG: yps:YPTB2687 hypothetical protein	1609403	1610251	+	SGene	1608903	1609403	1609322	1.95	rpoE	promoter=rpoE;box35pos=383;box35seq=aaaata;box10pos=408;box10seq=tctga
YPK_1457	YPK_1457	hypothetical protein KEGG: yps:YPTB2687 hypothetical protein	1609403	1610251	+	SGene	1608903	1609403	1609345	1.95	rpoS	promoter=rpoS;box35pos=406;box35seq=tatctg;box10pos=429;box10seq=tagtat
YPK_1457	YPK_1457	hypothetical protein KEGG: yps:YPTB2687 hypothetical protein	1609403	1610251	+	SGene	1608903	1609403	1609344	1.95	rpoD	promoter=rpoD;box35pos=406;box35seq=tatctg;box10pos=429;box10seq=tagtat
YPK_1460	YPK_1460	hypothetical protein KEGG: yps:YPTB2685 hypothetical protein	1611426	1611950	+	SGene	1610926	1611426	1611251	1.98	rpoE	promoter=rpoE;box35pos=290;box35seq=aaatta;box10pos=314;box10seq=tctga
YPK_1460	YPK_1460	hypothetical protein KEGG: yps:YPTB2685 hypothetical protein	1611426	1611950	+	SGene	1610926	1611426	1611201	1.96	rpoS	promoter=rpoS;box35pos=238;box35seq=cataat;box10pos=262;box10seq=tataat
YPK_1460	YPK_1460	hypothetical protein KEGG: yps:YPTB2685 hypothetical protein	1611426	1611950	+	SGene	1610926	1611426	1611140	1.98	rpoD	promoter=rpoD;box35pos=178;box35seq=tgactt;box10pos=202;box10seq=tataat
YPK_1463	YPK_1463	extracellular solute-binding protein PFAM: extracellular solute-binding protein family 1~KEGG: ypi:YpsIP31758_1350 iron(III) ABC transporter, permease protein, periplasmic iron(III)-binding protein	1614711	1615730	-	TSS	1615783	1616283	1616554	1.92	rpoE	promoter=rpoE;box35pos=197;box35seq=taacgg;box10pos=218;box10seq=tcaca
YPK_1463	YPK_1463	extracellular solute-binding protein PFAM: extracellular solute-binding protein family 1~KEGG: ypi:YpsIP31758_1350 iron(III) ABC transporter, permease protein, periplasmic iron(III)-binding protein	1614711	1615730	-	TSS	1615783	1616283	1616534	1.95	rpoS	promoter=rpoS;box35pos=213;box35seq=tttgtt;box10pos=236;box10seq=taccat
YPK_1463	YPK_1463	extracellular solute-binding protein PFAM: extracellular solute-binding protein family 1~KEGG: ypi:YpsIP31758_1350 iron(III) ABC transporter, permease protein, periplasmic iron(III)-binding protein	1614711	1615730	-	TSS	1615783	1616283	1616513	1.96	rpoD	promoter=rpoD;box35pos=235;box35seq=ttacca;box10pos=258;box10seq=tatggt
YPK_1470	YPK_1470	hypothetical protein KEGG: ypi:YpsIP31758_1358 hypothetical protein	1623607	1624638	-	OPeron	1628842	1629342	1629612	1.98	rpoE	promoter=rpoE;box35pos=197;box35seq=aaaata;box10pos=219;box10seq=tctga
YPK_1470	YPK_1470	hypothetical protein KEGG: ypi:YpsIP31758_1358 hypothetical protein	1623607	1624638	-	OPeron	1628842	1629342	1629616	1.96	rpoS	promoter=rpoS;box35pos=185;box35seq=gtgcaa;box10pos=213;box10seq=tattct
YPK_1470	YPK_1470	hypothetical protein KEGG: ypi:YpsIP31758_1358 hypothetical protein	1623607	1624638	-	OPeron	1628842	1629342	1629620	1.96	rpoD	promoter=rpoD;box35pos=185;box35seq=gtgcaa;box10pos=210;box10seq=taatat
YPK_1479	YPK_1479	type VI secretion protein TIGRFAM: type VI secretion protein, VC_A0107 family~PFAM: conserved hypothetical protein~KEGG: ypi:YpsIP31758_1367 hypothetical protein	1637456	1637980	+	OPeron	1636956	1637456	1637291	1.95	rpoE	promoter=rpoE;box35pos=299;box35seq=ccatta;box10pos=324;box10seq=gcaaa
YPK_1479	YPK_1479	type VI secretion protein TIGRFAM: type VI secretion protein, VC_A0107 family~PFAM: conserved hypothetical protein~KEGG: ypi:YpsIP31758_1367 hypothetical protein	1637456	1637980	+	OPeron	1636956	1637456	1637238	1.94	rpoS	promoter=rpoS;box35pos=241;box35seq=ttggta;box10pos=269;box10seq=tatcat
YPK_1479	YPK_1479	type VI secretion protein TIGRFAM: type VI secretion protein, VC_A0107 family~PFAM: conserved hypothetical protein~KEGG: ypi:YpsIP31758_1367 hypothetical protein	1637456	1637980	+	OPeron	1636956	1637456	1637286	1.97	rpoD	promoter=rpoD;box35pos=296;box35seq=caccca;box10pos=318;box10seq=tattat
YPK_1482	YPK_1482	hypothetical protein KEGG: yps:YPTB2663 hypothetical protein	1640577	1641137	+	OPeron	1640077	1640577	1640301	1.97	rpoE	promoter=rpoE;box35pos=195;box35seq=aaatct;box10pos=213;box10seq=gctaa
YPK_1482	YPK_1482	hypothetical protein KEGG: yps:YPTB2663 hypothetical protein	1640577	1641137	+	OPeron	1640077	1640577	1640340	1.95	rpoS	promoter=rpoS;box35pos=225;box35seq=gttaaa;box10pos=250;box10seq=tacgtt
YPK_1482	YPK_1482	hypothetical protein KEGG: yps:YPTB2663 hypothetical protein	1640577	1641137	+	OPeron	1640077	1640577	1640518	1.93	rpoD	promoter=rpoD;box35pos=404;box35seq=gtgcag;box10pos=429;box10seq=catgat
YPK_1507	YPK_1507	hypothetical protein PFAM: conserved hypothetical protein~KEGG: ypi:YpsIP31758_1398 conserved hypothetical protein TIGR00743	1668376	1668672	+	SGene	1667876	1668376	1668322	1.97	rpoE	promoter=rpoE;box35pos=416;box35seq=aaaata;box10pos=435;box10seq=tctta
YPK_1507	YPK_1507	hypothetical protein PFAM: conserved hypothetical protein~KEGG: ypi:YpsIP31758_1398 conserved hypothetical protein TIGR00743	1668376	1668672	+	SGene	1667876	1668376	1668273	1.95	rpoS	promoter=rpoS;box35pos=360;box35seq=tataaa;box10pos=384;box10seq=aacgat
YPK_1507	YPK_1507	hypothetical protein PFAM: conserved hypothetical protein~KEGG: ypi:YpsIP31758_1398 conserved hypothetical protein TIGR00743	1668376	1668672	+	SGene	1667876	1668376	1668308	1.96	rpoD	promoter=rpoD;box35pos=392;box35seq=gtggta;box10pos=420;box10seq=tatttt
YPK_1521	YPK_1521	aspartate racemase TIGRFAM: aspartate racemase~PFAM: Asp/Glu/hydantoin racemase~KEGG: ypi:YpsIP31758_1412 aspartate racemase family protein	1683587	1684282	-	SGene	1684282	1684782	1685035	1.98	rpoE	promoter=rpoE;box35pos=212;box35seq=gcccta;box10pos=237;box10seq=tcaaa
YPK_1521	YPK_1521	aspartate racemase TIGRFAM: aspartate racemase~PFAM: Asp/Glu/hydantoin racemase~KEGG: ypi:YpsIP31758_1412 aspartate racemase family protein	1683587	1684282	-	SGene	1684282	1684782	1684961	1.95	rpoS	promoter=rpoS;box35pos=288;box35seq=tatatt;box10pos=310;box10seq=tactta
YPK_1521	YPK_1521	aspartate racemase TIGRFAM: aspartate racemase~PFAM: Asp/Glu/hydantoin racemase~KEGG: ypi:YpsIP31758_1412 aspartate racemase family protein	1683587	1684282	-	SGene	1684282	1684782	1685002	1.96	rpoD	promoter=rpoD;box35pos=242;box35seq=tcagag;box10pos=268;box10seq=tattat
YPK_1538	YPK_1538	cationic amino acid ABC transporter periplasmic binding protein TIGRFAM: cationic amino acid ABC transporter, periplasmic binding protein~PFAM: extracellular solute-binding protein family 3~KEGG: ypi:YpsIP31758_1428 histidine ABC transporter, periplasmic histidine-binding protein	1700733	1701515	+	TSS	1699876	1700376	1700303	1.94	rpoE	promoter=rpoE;box35pos=391;box35seq=tcacct;box10pos=416;box10seq=gcaat
YPK_1538	YPK_1538	cationic amino acid ABC transporter periplasmic binding protein TIGRFAM: cationic amino acid ABC transporter, periplasmic binding protein~PFAM: extracellular solute-binding protein family 3~KEGG: ypi:YpsIP31758_1428 histidine ABC transporter, periplasmic histidine-binding protein	1700733	1701515	+	TSS	1699876	1700376	1700271	1.94	rpoS	promoter=rpoS;box35pos=357;box35seq=ttgaca;box10pos=382;box10seq=cacatt
YPK_1538	YPK_1538	cationic amino acid ABC transporter periplasmic binding protein TIGRFAM: cationic amino acid ABC transporter, periplasmic binding protein~PFAM: extracellular solute-binding protein family 3~KEGG: ypi:YpsIP31758_1428 histidine ABC transporter, periplasmic histidine-binding protein	1700733	1701515	+	TSS	1699876	1700376	1700298	1.94	rpoD	promoter=rpoD;box35pos=386;box35seq=tttaat;box10pos=409;box10seq=taatca
YPK_1542	YPK_1542	hypothetical protein PFAM: NAD-dependent epimerase/dehydratase; dTDP-4-dehydrorhamnose reductase; domain of unknown function DUF1731~KEGG: ypi:YpsIP31758_1432 NAD dependent epimerase/dehydratase family protein	1703945	1704853	-	TSS	1704858	1705358	1705632	1.97	rpoE	promoter=rpoE;box35pos=191;box35seq=aaaata;box10pos=215;box10seq=tcaat
YPK_1542	YPK_1542	hypothetical protein PFAM: NAD-dependent epimerase/dehydratase; dTDP-4-dehydrorhamnose reductase; domain of unknown function DUF1731~KEGG: ypi:YpsIP31758_1432 NAD dependent epimerase/dehydratase family protein	1703945	1704853	-	TSS	1704858	1705358	1705526	1.94	rpoS	promoter=rpoS;box35pos=296;box35seq=ctgctg;box10pos=319;box10seq=tactgt
YPK_1542	YPK_1542	hypothetical protein PFAM: NAD-dependent epimerase/dehydratase; dTDP-4-dehydrorhamnose reductase; domain of unknown function DUF1731~KEGG: ypi:YpsIP31758_1432 NAD dependent epimerase/dehydratase family protein	1703945	1704853	-	TSS	1704858	1705358	1705484	1.92	rpoD	promoter=rpoD;box35pos=337;box35seq=tttcca;box10pos=361;box10seq=tatcaa
YPK_1562	YPK_1562	bifunctional NADH:ubiquinone oxidoreductase subunit C/D NuoCD; NDH-1 shuttles electrons from NADH, via FMN and iron-sulfur (Fe-S) centers, to quinones in the respiratory chain; subunits NuoCD, E, F, and G constitute the peripheral sector of the complex; in Escherichia coli this gene encodes a fusion protein of	1726067	1727863	+	OPeron	1725567	1726067	1725995	1.93	rpoD	promoter=rpoD;box35pos=393;box35seq=gtgatg;box10pos=416;box10seq=taattt
YPK_1564	YPK_1564	NADH dehydrogenase I subunit F shuttles electrons from NADH, via FMN and iron-sulfur (Fe-S) centers, to quinones in the respiratory chain; NuoF is part of the soluble NADH dehydrogenase fragment, which represents the electron input part of NADH dehydrogenase	1728426	1729811	+	OPeron	1725567	1726067	1725995	1.93	rpoD	promoter=rpoD;box35pos=393;box35seq=gtgatg;box10pos=416;box10seq=taattt
YPK_1573	YPK_1573	hypothetical protein KEGG: ypi:YpsIP31758_1467 hypothetical protein	1740149	1741228	+	SGene	1739649	1740149	1740083	1.96	rpoE	promoter=rpoE;box35pos=401;box35seq=agatta;box10pos=423;box10seq=tctgt
YPK_1573	YPK_1573	hypothetical protein KEGG: ypi:YpsIP31758_1467 hypothetical protein	1740149	1741228	+	SGene	1739649	1740149	1740066	1.96	rpoD	promoter=rpoD;box35pos=379;box35seq=ctgaat;box10pos=405;box10seq=tagggt
YPK_1579	YPK_1579	NAD-binding D-isomer specific 2-hydroxyacid dehydrogenase PFAM: D-isomer specific 2-hydroxyacid dehydrogenase catalytic region; D-isomer specific 2-hydroxyacid dehydrogenase NAD-binding~KEGG: yps:YPTB2568 putative D-isomer specific 2-hydroxyacid dehydrogenase family	1747561	1748511	+	SGene	1747061	1747561	1747415	1.94	rpoE	promoter=rpoE;box35pos=319;box35seq=aaaata;box10pos=343;box10seq=tcata
YPK_1579	YPK_1579	NAD-binding D-isomer specific 2-hydroxyacid dehydrogenase PFAM: D-isomer specific 2-hydroxyacid dehydrogenase catalytic region; D-isomer specific 2-hydroxyacid dehydrogenase NAD-binding~KEGG: yps:YPTB2568 putative D-isomer specific 2-hydroxyacid dehydrogenase family	1747561	1748511	+	SGene	1747061	1747561	1747352	1.94	rpoS	promoter=rpoS;box35pos=256;box35seq=gataag;box10pos=278;box10seq=taacat
YPK_1579	YPK_1579	NAD-binding D-isomer specific 2-hydroxyacid dehydrogenase PFAM: D-isomer specific 2-hydroxyacid dehydrogenase catalytic region; D-isomer specific 2-hydroxyacid dehydrogenase NAD-binding~KEGG: yps:YPTB2568 putative D-isomer specific 2-hydroxyacid dehydrogenase family	1747561	1748511	+	SGene	1747061	1747561	1747352	1.97	rpoD	promoter=rpoD;box35pos=256;box35seq=gataag;box10pos=278;box10seq=taacat
YPK_1580	YPK_1580	major facilitator transporter PFAM: General substrate transporter; major facilitator superfamily MFS_1~KEGG: yps:YPTB2567 putative 2-ketogluconate transporter, ACS family-MFS superfamily	1748874	1750190	+	OPeron	1748374	1748874	1748677	1.98	rpoE	promoter=rpoE;box35pos=271;box35seq=aaattt;box10pos=292;box10seq=tcaca
YPK_1580	YPK_1580	major facilitator transporter PFAM: General substrate transporter; major facilitator superfamily MFS_1~KEGG: yps:YPTB2567 putative 2-ketogluconate transporter, ACS family-MFS superfamily	1748874	1750190	+	OPeron	1748374	1748874	1748811	1.95	rpoS	promoter=rpoS;box35pos=402;box35seq=tttaag;box10pos=424;box10seq=taattt
YPK_1580	YPK_1580	major facilitator transporter PFAM: General substrate transporter; major facilitator superfamily MFS_1~KEGG: yps:YPTB2567 putative 2-ketogluconate transporter, ACS family-MFS superfamily	1748874	1750190	+	OPeron	1748374	1748874	1748806	1.97	rpoD	promoter=rpoD;box35pos=397;box35seq=tttatt;box10pos=420;box10seq=taaata
YPK_1590	YPK_1590	acyl-CoA thioester hydrolase YfbB catalyzes the hydrolysis of the thioester bond in palmitoyl-CoA	1758906	1759724	+	OPeron	1756706	1757206	1757150	1.97	rpoE	promoter=rpoE;box35pos=408;box35seq=taaagc;box10pos=433;box10seq=acggt
YPK_1590	YPK_1590	acyl-CoA thioester hydrolase YfbB catalyzes the hydrolysis of the thioester bond in palmitoyl-CoA	1758906	1759724	+	OPeron	1756706	1757206	1757114	1.91	rpoS	promoter=rpoS;box35pos=369;box35seq=tagcca;box10pos=395;box10seq=aaaact
YPK_1590	YPK_1590	acyl-CoA thioester hydrolase YfbB catalyzes the hydrolysis of the thioester bond in palmitoyl-CoA	1758906	1759724	+	OPeron	1756706	1757206	1757155	1.96	rpoD	promoter=rpoD;box35pos=415;box35seq=gtcact;box10pos=437;box10seq=taacgt
YPK_1595	YPK_1595	hypothetical protein PFAM: protein of unknown function DUF1471~KEGG: yps:YPTB2554 hypothetical protein	1764376	1764636	-	SGene	1764636	1765136	1765220	1.92	rpoS	promoter=rpoS;box35pos=381;box35seq=ccgaaa;box10pos=403;box10seq=tatgat
YPK_1595	YPK_1595	hypothetical protein PFAM: protein of unknown function DUF1471~KEGG: yps:YPTB2554 hypothetical protein	1764376	1764636	-	SGene	1764636	1765136	1765287	1.91	rpoD	promoter=rpoD;box35pos=316;box35seq=tatcag;box10pos=337;box10seq=gaaaat
YPK_1604	YPK_1604	N-acetyltransferase GCN5 PFAM: GCN5-related N-acetyltransferase~KEGG: yps:YPTB2544 hypothetical protein	1773960	1774457	-	OPeron	1775360	1775860	1776018	1.98	rpoE	promoter=rpoE;box35pos=302;box35seq=taatta;box10pos=327;box10seq=acaga
YPK_1604	YPK_1604	N-acetyltransferase GCN5 PFAM: GCN5-related N-acetyltransferase~KEGG: yps:YPTB2544 hypothetical protein	1773960	1774457	-	OPeron	1775360	1775860	1775996	1.96	rpoS	promoter=rpoS;box35pos=323;box35seq=tataac;box10pos=351;box10seq=tatagt
YPK_1604	YPK_1604	N-acetyltransferase GCN5 PFAM: GCN5-related N-acetyltransferase~KEGG: yps:YPTB2544 hypothetical protein	1773960	1774457	-	OPeron	1775360	1775860	1776030	1.97	rpoD	promoter=rpoD;box35pos=291;box35seq=gttaca;box10pos=318;box10seq=taatat
YPK_1624	YPK_1624	transposase IS3/IS911 family protein PFAM: transposase IS3/IS911 family protein~KEGG: ent:Ent638_4321 transposase IS3/IS911 family protein	1803665	1803931	+	TSS	1803147	1803647	1803595	1.96	rpoE	promoter=rpoE;box35pos=416;box35seq=aaatct;box10pos=437;box10seq=gcttt
YPK_1624	YPK_1624	transposase IS3/IS911 family protein PFAM: transposase IS3/IS911 family protein~KEGG: ent:Ent638_4321 transposase IS3/IS911 family protein	1803665	1803931	+	TSS	1803147	1803647	1803576	1.94	rpoS	promoter=rpoS;box35pos=393;box35seq=ctgccg;box10pos=416;box10seq=aaatct
YPK_1641	YPK_1641	mechanosensitive ion channel MscS PFAM: MscS Mechanosensitive ion channel~KEGG: ypm:YP_2288 hypothetical protein	1819765	1821009	-	SGene	1821009	1821509	1821580	1.98	rpoE	promoter=rpoE;box35pos=393;box35seq=gacata;box10pos=418;box10seq=gctta
YPK_1641	YPK_1641	mechanosensitive ion channel MscS PFAM: MscS Mechanosensitive ion channel~KEGG: ypm:YP_2288 hypothetical protein	1819765	1821009	-	SGene	1821009	1821509	1821669	1.96	rpoS	promoter=rpoS;box35pos=306;box35seq=tttaca;box10pos=327;box10seq=tattat
YPK_1641	YPK_1641	mechanosensitive ion channel MscS PFAM: MscS Mechanosensitive ion channel~KEGG: ypm:YP_2288 hypothetical protein	1819765	1821009	-	SGene	1821009	1821509	1821681	1.96	rpoD	promoter=rpoD;box35pos=293;box35seq=gcgaaa;box10pos=317;box10seq=gatgtt
YPK_1655	YPK_1655	LuxR family transcriptional regulator PFAM: regulatory protein LuxR; Autoinducer-binding domain protein~KEGG: ypi:YpsIP31758_1547 transcriptional regulator, LuxR family	1837676	1838413	+	TSS	1837151	1837651	1837500	1.98	rpoE	promoter=rpoE;box35pos=316;box35seq=gaaata;box10pos=338;box10seq=tctat
YPK_1655	YPK_1655	LuxR family transcriptional regulator PFAM: regulatory protein LuxR; Autoinducer-binding domain protein~KEGG: ypi:YpsIP31758_1547 transcriptional regulator, LuxR family	1837676	1838413	+	TSS	1837151	1837651	1837504	1.96	rpoS	promoter=rpoS;box35pos=314;box35seq=cagaaa;box10pos=340;box10seq=tataat
YPK_1655	YPK_1655	LuxR family transcriptional regulator PFAM: regulatory protein LuxR; Autoinducer-binding domain protein~KEGG: ypi:YpsIP31758_1547 transcriptional regulator, LuxR family	1837676	1838413	+	TSS	1837151	1837651	1837492	1.98	rpoD	promoter=rpoD;box35pos=307;box35seq=tttaaa;box10pos=329;box10seq=taacat
YPK_1659	YPK_1659	hypothetical protein KEGG: ypi:YpsIP31758_1550 hypothetical protein	1842610	1842855	-	TSS	1842975	1843475	1843611	1.97	rpoE	promoter=rpoE;box35pos=331;box35seq=gaaagg;box10pos=353;box10seq=tccat
YPK_1659	YPK_1659	hypothetical protein KEGG: ypi:YpsIP31758_1550 hypothetical protein	1842610	1842855	-	TSS	1842975	1843475	1843532	1.95	rpoS	promoter=rpoS;box35pos=403;box35seq=gtaaat;box10pos=430;box10seq=tagcct
YPK_1659	YPK_1659	hypothetical protein KEGG: ypi:YpsIP31758_1550 hypothetical protein	1842610	1842855	-	TSS	1842975	1843475	1843585	1.96	rpoD	promoter=rpoD;box35pos=351;box35seq=tttcca;box10pos=378;box10seq=tattga
YPK_1675	YPK_1675	dihydroorotase catalyzes the formation of N-carbamoyl-L-aspartate from (S)-dihydroorotate in pyrimidine biosynthesis	1860017	1861063	-	TSS	1861127	1861627	1861701	1.97	rpoD	promoter=rpoD;box35pos=387;box35seq=taagca;box10pos=414;box10seq=caaact
YPK_1681	YPK_1681	hypothetical protein PFAM: protein of unknown function DUF177~KEGG: ypi:YpsIP31758_1573 hypothetical protein	1868584	1869108	+	TSS	1867996	1868496	1868197	1.91	rpoD	promoter=rpoD;box35pos=168;box35seq=gttgca;box10pos=189;box10seq=tagaat
YPK_1685	YPK_1685	malonyl CoA-acyl carrier protein transacylase TIGRFAM: malonyl CoA-acyl carrier protein transacylase~PFAM: Acyl transferase~KEGG: yps:YPTB2472 acyl carrier protein S-malonyltransferase	1871351	1872280	+	OPeron	1868084	1868584	1868523	1.93	rpoS	promoter=rpoS;box35pos=399;box35seq=cttaaa;box10pos=426;box10seq=aatatt
YPK_1685	YPK_1685	malonyl CoA-acyl carrier protein transacylase TIGRFAM: malonyl CoA-acyl carrier protein transacylase~PFAM: Acyl transferase~KEGG: yps:YPTB2472 acyl carrier protein S-malonyltransferase	1871351	1872280	+	OPeron	1868084	1868584	1868455	1.94	rpoD	promoter=rpoD;box35pos=335;box35seq=ttgaag;box10pos=359;box10seq=taatat
YPK_1686	fabG	3-ketoacyl-ACP reductase catalyzes the first of the two reduction steps in the elongation cycle of fatty acid synthesis	1872294	1873028	+	TSS	1871617	1872117	1871839	1.9	rpoD	promoter=rpoD;box35pos=183;box35seq=cagccc;box10pos=210;box10seq=taaact
YPK_1687	acpP	acyl carrier protein carries the fatty acid chain in fatty acid biosynthesis	1873182	1873418	+	TSS	1872643	1873143	1873092	1.94	rpoS	promoter=rpoS;box35pos=410;box35seq=tttgag;box10pos=436;box10seq=taaaat
YPK_1687	acpP	acyl carrier protein carries the fatty acid chain in fatty acid biosynthesis	1873182	1873418	+	TSS	1872643	1873143	1873050	1.96	rpoD	promoter=rpoD;box35pos=373;box35seq=tgtata;box10pos=394;box10seq=gaaagt
YPK_1694	YPK_1694	PTS system glucose-specific transporter subunit IIBC phosphoenolpyruvate-dependent sugar phosphotransferase system; catalyzes the phosphorylation of incoming sugar substrates concomitant with their translocation across the cell membrane; IIB is phosphorylated by IIA and then transfers the phosphoryl group t	1880016	1881449	+	TSS	1879400	1879900	1879770	1.93	rpoE	promoter=rpoE;box35pos=337;box35seq=taatcg;box10pos=359;box10seq=tctca
YPK_1694	YPK_1694	PTS system glucose-specific transporter subunit IIBC phosphoenolpyruvate-dependent sugar phosphotransferase system; catalyzes the phosphorylation of incoming sugar substrates concomitant with their translocation across the cell membrane; IIB is phosphorylated by IIA and then transfers the phosphoryl group t	1880016	1881449	+	TSS	1879400	1879900	1879822	1.92	rpoS	promoter=rpoS;box35pos=386;box35seq=gttatt;box10pos=409;box10seq=taaagt
YPK_1694	YPK_1694	PTS system glucose-specific transporter subunit IIBC phosphoenolpyruvate-dependent sugar phosphotransferase system; catalyzes the phosphorylation of incoming sugar substrates concomitant with their translocation across the cell membrane; IIB is phosphorylated by IIA and then transfers the phosphoryl group t	1880016	1881449	+	TSS	1879400	1879900	1879727	1.96	rpoD	promoter=rpoD;box35pos=291;box35seq=gagaag;box10pos=315;box10seq=tacttt
YPK_1731	YPK_1731	hypothetical protein KEGG: ypm:YP_1779 hypothetical protein	1919866	1920069	-	TSS	1920103	1920603	1920798	1.95	rpoS	promoter=rpoS;box35pos=269;box35seq=cttata;box10pos=292;box10seq=aacgct
YPK_1731	YPK_1731	hypothetical protein KEGG: ypm:YP_1779 hypothetical protein	1919866	1920069	-	TSS	1920103	1920603	1920871	1.96	rpoD	promoter=rpoD;box35pos=193;box35seq=tatcag;box10pos=220;box10seq=tattaa
YPK_1758	YPK_1758	chemotaxis regulatory protein CheY chemotaxis regulator that, when phosphorylated, interacts with the flagellar motor causing the flagella to spin clockwise which causes the cell to tumble	1953337	1953726	+	OPeron	1952837	1953337	1953253	1.93	rpoE	promoter=rpoE;box35pos=386;box35seq=gccctt;box10pos=404;box10seq=tctca
YPK_1758	YPK_1758	chemotaxis regulatory protein CheY chemotaxis regulator that, when phosphorylated, interacts with the flagellar motor causing the flagella to spin clockwise which causes the cell to tumble	1953337	1953726	+	OPeron	1952837	1953337	1953259	1.97	rpoD	promoter=rpoD;box35pos=388;box35seq=ccttcg;box10pos=410;box10seq=tatgat
YPK_1761	YPK_1761	YadA domain-containing protein PFAM: YadA domain protein; Haemagluttinin domain protein; Hep_Hag repeat-containing protein~KEGG: yps:YPTB2394 putative surface protein	1956058	1958688	+	SGene	1955558	1956058	1955790	1.97	rpoE	promoter=rpoE;box35pos=197;box35seq=gccttt;box10pos=221;box10seq=actat
YPK_1761	YPK_1761	YadA domain-containing protein PFAM: YadA domain protein; Haemagluttinin domain protein; Hep_Hag repeat-containing protein~KEGG: yps:YPTB2394 putative surface protein	1956058	1958688	+	SGene	1955558	1956058	1955777	1.96	rpoS	promoter=rpoS;box35pos=185;box35seq=ctcatt;box10pos=206;box10seq=tacgtt
YPK_1761	YPK_1761	YadA domain-containing protein PFAM: YadA domain protein; Haemagluttinin domain protein; Hep_Hag repeat-containing protein~KEGG: yps:YPTB2394 putative surface protein	1956058	1958688	+	SGene	1955558	1956058	1955913	1.97	rpoD	promoter=rpoD;box35pos=320;box35seq=tatcac;box10pos=343;box10seq=taaatt
YPK_1771	YPK_1771	hypothetical protein PFAM: protein of unknown function DUF437~KEGG: ypm:YP_1718 hypothetical protein	1965827	1966216	+	SGene	1965327	1965827	1965567	1.95	rpoE	promoter=rpoE;box35pos=206;box35seq=gcacag;box10pos=229;box10seq=tccaa
YPK_1771	YPK_1771	hypothetical protein PFAM: protein of unknown function DUF437~KEGG: ypm:YP_1718 hypothetical protein	1965827	1966216	+	SGene	1965327	1965827	1965743	1.94	rpoS	promoter=rpoS;box35pos=379;box35seq=ttgaag;box10pos=403;box10seq=aaattt
YPK_1771	YPK_1771	hypothetical protein PFAM: protein of unknown function DUF437~KEGG: ypm:YP_1718 hypothetical protein	1965827	1966216	+	SGene	1965327	1965827	1965563	1.94	rpoD	promoter=rpoD;box35pos=201;box35seq=cagatg;box10pos=224;box10seq=catttt
YPK_1776	YPK_1776	spore coat U domain-containing protein PFAM: Spore coat U domain protein~KEGG: ypm:YP_1723 hypothetical protein	1971301	1971858	-	OPeron	1972969	1973469	1973727	1.98	rpoE	promoter=rpoE;box35pos=209;box35seq=aaaatt;box10pos=232;box10seq=gcaaa
YPK_1776	YPK_1776	spore coat U domain-containing protein PFAM: Spore coat U domain protein~KEGG: ypm:YP_1723 hypothetical protein	1971301	1971858	-	OPeron	1972969	1973469	1973701	1.95	rpoS	promoter=rpoS;box35pos=230;box35seq=cagcaa;box10pos=255;box10seq=tattat
YPK_1776	YPK_1776	spore coat U domain-containing protein PFAM: Spore coat U domain protein~KEGG: ypm:YP_1723 hypothetical protein	1971301	1971858	-	OPeron	1972969	1973469	1973763	1.98	rpoD	promoter=rpoD;box35pos=168;box35seq=tttatt;box10pos=193;box10seq=tatttt
YPK_1782	YPK_1782	putative solute/DNA competence effector affects solute and DNA transport through an unknown mechanism	1978121	1978834	+	TSS	1977574	1978074	1978003	1.93	rpoD	promoter=rpoD;box35pos=394;box35seq=tttgcg;box10pos=417;box10seq=gatagt
YPK_1806	YPK_1806	transposase mutator type PFAM: transposase mutator type~KEGG: yps:YPTB3311 putative transposase	2006761	2007969	-	SGene	2007969	2008469	2008541	1.94	rpoE	promoter=rpoE;box35pos=398;box35seq=gacttt;box10pos=417;box10seq=gcatt
YPK_1806	YPK_1806	transposase mutator type PFAM: transposase mutator type~KEGG: yps:YPTB3311 putative transposase	2006761	2007969	-	SGene	2007969	2008469	2008653	1.93	rpoS	promoter=rpoS;box35pos=281;box35seq=caggca;box10pos=303;box10seq=tacagt
YPK_1806	YPK_1806	transposase mutator type PFAM: transposase mutator type~KEGG: yps:YPTB3311 putative transposase	2006761	2007969	-	SGene	2007969	2008469	2008661	1.96	rpoD	promoter=rpoD;box35pos=272;box35seq=tatcaa;box10pos=296;box10seq=tattgt
YPK_1815	YPK_1815	periplasmic solute binding protein PFAM: periplasmic solute binding protein~KEGG: yps:YPTB2347 ABC transporter, periplasmic iron siderOPeronhore-binding protein YfeA	2014108	2015076	-	OPeron	2015076	2015576	2015763	1.96	rpoE	promoter=rpoE;box35pos=284;box35seq=acaagc;box10pos=302;box10seq=gctga
YPK_1815	YPK_1815	periplasmic solute binding protein PFAM: periplasmic solute binding protein~KEGG: yps:YPTB2347 ABC transporter, periplasmic iron siderOPeronhore-binding protein YfeA	2014108	2015076	-	OPeron	2015076	2015576	2015856	1.94	rpoS	promoter=rpoS;box35pos=180;box35seq=gctaca;box10pos=207;box10seq=aatact
YPK_1815	YPK_1815	periplasmic solute binding protein PFAM: periplasmic solute binding protein~KEGG: yps:YPTB2347 ABC transporter, periplasmic iron siderOPeronhore-binding protein YfeA	2014108	2015076	-	OPeron	2015076	2015576	2015817	1.96	rpoD	promoter=rpoD;box35pos=226;box35seq=tcggtt;box10pos=247;box10seq=tattgt
YPK_1818	YPK_1818	hypothetical protein KEGG: ypi:YpsIP31758_1708 hypothetical protein	2017074	2017325	+	TSS	2016546	2017046	2016794	1.94	rpoE	promoter=rpoE;box35pos=212;box35seq=gatcct;box10pos=237;box10seq=tcaaa
YPK_1818	YPK_1818	hypothetical protein KEGG: ypi:YpsIP31758_1708 hypothetical protein	2017074	2017325	+	TSS	2016546	2017046	2016881	1.94	rpoS	promoter=rpoS;box35pos=296;box35seq=gtgaag;box10pos=322;box10seq=cactgt
YPK_1818	YPK_1818	hypothetical protein KEGG: ypi:YpsIP31758_1708 hypothetical protein	2017074	2017325	+	TSS	2016546	2017046	2016755	1.97	rpoD	promoter=rpoD;box35pos=170;box35seq=cctaag;box10pos=196;box10seq=gaaaat
YPK_1821	YPK_1821	translation initiation factor IF-3 IF-3 has several functions that are required and promote translation initiation including; preventing association of 70S by binding to 30S; monitoring codon-anticodon interactions by promoting disassociation of fMet-tRNA(fMet) from initiation complexes fo	2020820	2021170	+	TSS	2019938	2020438	2020142	1.94	rpoS	promoter=rpoS;box35pos=169;box35seq=ttggat;box10pos=192;box10seq=taccgt
YPK_1821	YPK_1821	translation initiation factor IF-3 IF-3 has several functions that are required and promote translation initiation including; preventing association of 70S by binding to 30S; monitoring codon-anticodon interactions by promoting disassociation of fMet-tRNA(fMet) from initiation complexes fo	2020820	2021170	+	TSS	2019938	2020438	2020268	1.91	rpoD	promoter=rpoD;box35pos=297;box35seq=ttcaat;box10pos=318;box10seq=tatctt
YPK_1824	pheS	phenylalanyl-tRNA synthetase subunit alpha catalyzes a two-step reaction, first charging a phenylalanine molecule by linking its carboxyl group to the alpha-phosphate of ATP, followed by transfer of the aminoacyl-adenylate to its tRNA; forms a heterotetramer of alpha(2)beta(2); binds two magnesium	2022357	2023340	+	OPeron	2021857	2022357	2022276	1.98	rpoE	promoter=rpoE;box35pos=386;box35seq=tactta;box10pos=408;box10seq=tcagt
YPK_1824	pheS	phenylalanyl-tRNA synthetase subunit alpha catalyzes a two-step reaction, first charging a phenylalanine molecule by linking its carboxyl group to the alpha-phosphate of ATP, followed by transfer of the aminoacyl-adenylate to its tRNA; forms a heterotetramer of alpha(2)beta(2); binds two magnesium	2022357	2023340	+	OPeron	2021857	2022357	2022273	1.96	rpoS	promoter=rpoS;box35pos=376;box35seq=ccgatg;box10pos=403;box10seq=tatgat
YPK_1824	pheS	phenylalanyl-tRNA synthetase subunit alpha catalyzes a two-step reaction, first charging a phenylalanine molecule by linking its carboxyl group to the alpha-phosphate of ATP, followed by transfer of the aminoacyl-adenylate to its tRNA; forms a heterotetramer of alpha(2)beta(2); binds two magnesium	2022357	2023340	+	OPeron	2021857	2022357	2022272	1.96	rpoD	promoter=rpoD;box35pos=381;box35seq=gagctt;box10pos=403;box10seq=tatgat
YPK_1836	YPK_1836	hypothetical protein KEGG: ypm:YP_2204 hypothetical protein	2036509	2036853	+	OPeron	2029325	2029825	2029529	1.98	rpoE	promoter=rpoE;box35pos=171;box35seq=gcaata;box10pos=193;box10seq=tccta
YPK_1836	YPK_1836	hypothetical protein KEGG: ypm:YP_2204 hypothetical protein	2036509	2036853	+	OPeron	2029325	2029825	2029725	1.96	rpoS	promoter=rpoS;box35pos=362;box35seq=cttcct;box10pos=387;box10seq=taaact
YPK_1836	YPK_1836	hypothetical protein KEGG: ypm:YP_2204 hypothetical protein	2036509	2036853	+	OPeron	2029325	2029825	2029695	1.96	rpoD	promoter=rpoD;box35pos=335;box35seq=ttgttt;box10pos=356;box10seq=tagtgt
YPK_1854	YPK_1854	LPP repeat-containing protein PFAM: LPP repeat-containing protein~KEGG: ypi:YpsIP31758_1748 major outer membrane lipOPeronrotein	2059668	2059904	-	TSS	2059942	2060442	2060733	1.96	rpoE	promoter=rpoE;box35pos=174;box35seq=ggatta;box10pos=198;box10seq=tcaga
YPK_1854	YPK_1854	LPP repeat-containing protein PFAM: LPP repeat-containing protein~KEGG: ypi:YpsIP31758_1748 major outer membrane lipOPeronrotein	2059668	2059904	-	TSS	2059942	2060442	2060714	1.94	rpoS	promoter=rpoS;box35pos=187;box35seq=gtaaaa;box10pos=215;box10seq=caagct
YPK_1854	YPK_1854	LPP repeat-containing protein PFAM: LPP repeat-containing protein~KEGG: ypi:YpsIP31758_1748 major outer membrane lipOPeronrotein	2059668	2059904	-	TSS	2059942	2060442	2060741	1.96	rpoD	promoter=rpoD;box35pos=163;box35seq=gcgcta;box10pos=188;box10seq=taaaat
YPK_1855	YPK_1855	pyruvate kinase catalyzes the formation of phosphoenolpyruvate from pyruvate	2060225	2061637	-	TSS	2061903	2062403	2062463	1.95	rpoE	promoter=rpoE;box35pos=410;box35seq=aaacca;box10pos=430;box10seq=tccga
YPK_1855	YPK_1855	pyruvate kinase catalyzes the formation of phosphoenolpyruvate from pyruvate	2060225	2061637	-	TSS	2061903	2062403	2062679	1.93	rpoS	promoter=rpoS;box35pos=185;box35seq=cttatg;box10pos=211;box10seq=aacatt
YPK_1855	YPK_1855	pyruvate kinase catalyzes the formation of phosphoenolpyruvate from pyruvate	2060225	2061637	-	TSS	2061903	2062403	2062677	1.9	rpoD	promoter=rpoD;box35pos=185;box35seq=cttatg;box10pos=213;box10seq=cattat
YPK_1869	YPK_1869	lactoylglutathione lyase KEGG: ypi:YpsIP31758_1760 lactoylglutathione lyase~TIGRFAM: lactoylglutathione lyase~PFAM: Glyoxalase/bleomycin resistance protein/dioxygenase	2074596	2075003	-	TSS	2075057	2075557	2075810	1.92	rpoE	promoter=rpoE;box35pos=213;box35seq=gaatcc;box10pos=236;box10seq=tcagt
YPK_1869	YPK_1869	lactoylglutathione lyase KEGG: ypi:YpsIP31758_1760 lactoylglutathione lyase~TIGRFAM: lactoylglutathione lyase~PFAM: Glyoxalase/bleomycin resistance protein/dioxygenase	2074596	2075003	-	TSS	2075057	2075557	2075840	1.93	rpoS	promoter=rpoS;box35pos=176;box35seq=tttgta;box10pos=204;box10seq=taaaca
YPK_1869	YPK_1869	lactoylglutathione lyase KEGG: ypi:YpsIP31758_1760 lactoylglutathione lyase~TIGRFAM: lactoylglutathione lyase~PFAM: Glyoxalase/bleomycin resistance protein/dioxygenase	2074596	2075003	-	TSS	2075057	2075557	2075812	1.96	rpoD	promoter=rpoD;box35pos=211;box35seq=gagaat;box10pos=233;box10seq=tattca
YPK_1871	YPK_1871	N-ethylmaleimide reductase FMN-linked; catalyzes the formation of N-ethylsuccinimide from N-ethylmaleimide	2076501	2077598	-	OPeron	2078285	2078785	2079032	1.94	rpoS	promoter=rpoS;box35pos=215;box35seq=cagcca;box10pos=240;box10seq=catttt
YPK_1871	YPK_1871	N-ethylmaleimide reductase FMN-linked; catalyzes the formation of N-ethylsuccinimide from N-ethylmaleimide	2076501	2077598	-	OPeron	2078285	2078785	2078885	1.91	rpoD	promoter=rpoD;box35pos=362;box35seq=ttgacg;box10pos=388;box10seq=tatatt
YPK_1883	YPK_1883	glutathionine S-transferase PFAM: Glutathione S-transferase domain~KEGG: ypi:YpsIP31758_1775 glutathione S-transferase	2088741	2089346	-	TSS	2089381	2089881	2090180	1.95	rpoS	promoter=rpoS;box35pos=162;box35seq=ctgcca;box10pos=187;box10seq=tagcct
YPK_1883	YPK_1883	glutathionine S-transferase PFAM: Glutathione S-transferase domain~KEGG: ypi:YpsIP31758_1775 glutathione S-transferase	2088741	2089346	-	TSS	2089381	2089881	2090009	1.94	rpoD	promoter=rpoD;box35pos=338;box35seq=tcgata;box10pos=360;box10seq=tatttt
YPK_1891	YPK_1891	binding-protein-dependent transport system inner membrane protein PFAM: binding-protein-dependent transport systems inner membrane component~KEGG: ypm:YP_2145 peptide transport system permease protein	2097450	2098415	-	OPeron	2100055	2100555	2100654	1.95	rpoE	promoter=rpoE;box35pos=367;box35seq=acaatt;box10pos=390;box10seq=tcatt
YPK_1891	YPK_1891	binding-protein-dependent transport system inner membrane protein PFAM: binding-protein-dependent transport systems inner membrane component~KEGG: ypm:YP_2145 peptide transport system permease protein	2097450	2098415	-	OPeron	2100055	2100555	2100657	1.95	rpoS	promoter=rpoS;box35pos=364;box35seq=tttaca;box10pos=385;box10seq=tattat
YPK_1891	YPK_1891	binding-protein-dependent transport system inner membrane protein PFAM: binding-protein-dependent transport systems inner membrane component~KEGG: ypm:YP_2145 peptide transport system permease protein	2097450	2098415	-	OPeron	2100055	2100555	2100675	1.96	rpoD	promoter=rpoD;box35pos=344;box35seq=cagaat;box10pos=366;box10seq=tacaat
YPK_1895	pspB	phage shock protein B acts together with PspC to induce psp OPeroneron during infection with phage, exposure to ethanol or osmotic shock; forms a complex with PspA and C; PspC is required for PspAB binding	2102713	2102940	+	OPeron	2102213	2102713	2102584	1.96	rpoE	promoter=rpoE;box35pos=341;box35seq=taattt;box10pos=360;box10seq=gcaaa
YPK_1895	pspB	phage shock protein B acts together with PspC to induce psp OPeroneron during infection with phage, exposure to ethanol or osmotic shock; forms a complex with PspA and C; PspC is required for PspAB binding	2102713	2102940	+	OPeron	2102213	2102713	2102641	1.92	rpoS	promoter=rpoS;box35pos=392;box35seq=gcgata;box10pos=415;box10seq=tatata
YPK_1895	pspB	phage shock protein B acts together with PspC to induce psp OPeroneron during infection with phage, exposure to ethanol or osmotic shock; forms a complex with PspA and C; PspC is required for PspAB binding	2102713	2102940	+	OPeron	2102213	2102713	2102599	1.93	rpoD	promoter=rpoD;box35pos=353;box35seq=tttatt;box10pos=374;box10seq=taatgt
YPK_1901	YPK_1901	hypothetical protein PFAM: conserved hypothetical protein~KEGG: ypm:YP_2132 hypothetical protein	2106592	2107038	-	TSS	2107075	2107575	2107870	1.98	rpoE	promoter=rpoE;box35pos=175;box35seq=gaaaaa;box10pos=194;box10seq=acgat
YPK_1901	YPK_1901	hypothetical protein PFAM: conserved hypothetical protein~KEGG: ypm:YP_2132 hypothetical protein	2106592	2107038	-	TSS	2107075	2107575	2107856	1.95	rpoS	promoter=rpoS;box35pos=184;box35seq=taacaa;box10pos=206;box10seq=aacttt
YPK_1901	YPK_1901	hypothetical protein PFAM: conserved hypothetical protein~KEGG: ypm:YP_2132 hypothetical protein	2106592	2107038	-	TSS	2107075	2107575	2107870	1.96	rpoD	promoter=rpoD;box35pos=172;box35seq=ggggaa;box10pos=193;box10seq=gacgat
YPK_1914	YPK_1914	small multidrug resistance protein PFAM: small multidrug resistance protein~KEGG: ypm:YP_2119 quaternary ammonium compound-resistance protein	2122843	2123175	+	SGene	2122343	2122843	2122548	1.96	rpoE	promoter=rpoE;box35pos=176;box35seq=gaattc;box10pos=194;box10seq=tcaat
YPK_1914	YPK_1914	small multidrug resistance protein PFAM: small multidrug resistance protein~KEGG: ypm:YP_2119 quaternary ammonium compound-resistance protein	2122843	2123175	+	SGene	2122343	2122843	2122544	1.95	rpoS	promoter=rpoS;box35pos=165;box35seq=tttgtg;box10pos=188;box10seq=tacagt
YPK_1914	YPK_1914	small multidrug resistance protein PFAM: small multidrug resistance protein~KEGG: ypm:YP_2119 quaternary ammonium compound-resistance protein	2122843	2123175	+	SGene	2122343	2122843	2122716	1.96	rpoD	promoter=rpoD;box35pos=335;box35seq=taaaag;box10pos=361;box10seq=tataca
YPK_1940	YPK_1940	hypothetical protein PFAM: protein of unknown function DUF1471~KEGG: ypi:YpsIP31758_1829 hypothetical protein	2152363	2153316	-	TSS	2153383	2153883	2154050	1.97	rpoE	promoter=rpoE;box35pos=304;box35seq=aaaatc;box10pos=322;box10seq=tcaca
YPK_1940	YPK_1940	hypothetical protein PFAM: protein of unknown function DUF1471~KEGG: ypi:YpsIP31758_1829 hypothetical protein	2152363	2153316	-	TSS	2153383	2153883	2154065	1.95	rpoS	promoter=rpoS;box35pos=281;box35seq=tttccg;box10pos=305;box10seq=aaatct
YPK_1940	YPK_1940	hypothetical protein PFAM: protein of unknown function DUF1471~KEGG: ypi:YpsIP31758_1829 hypothetical protein	2152363	2153316	-	TSS	2153383	2153883	2154112	1.96	rpoD	promoter=rpoD;box35pos=233;box35seq=gacaag;box10pos=259;box10seq=tatagt
YPK_1950	YPK_1950	acetolactate synthase catalytic subunit TIGRFAM: acetolactate synthase, large subunit, biosynthetic type~PFAM: thiamine pyrOPeronhosphate protein domain protein TPP-binding; thiamine pyrOPeronhosphate protein central region; thiamine pyrOPeronhosphate protein TPP binding domain protein~KEGG: ypm:YP_2079 pu	2165246	2166913	-	OPeron	2166913	2167413	2167629	1.96	rpoE	promoter=rpoE;box35pos=251;box35seq=gatttt;box10pos=273;box10seq=gctga
YPK_1950	YPK_1950	acetolactate synthase catalytic subunit TIGRFAM: acetolactate synthase, large subunit, biosynthetic type~PFAM: thiamine pyrOPeronhosphate protein domain protein TPP-binding; thiamine pyrOPeronhosphate protein central region; thiamine pyrOPeronhosphate protein TPP binding domain protein~KEGG: ypm:YP_2079 pu	2165246	2166913	-	OPeron	2166913	2167413	2167512	1.95	rpoS	promoter=rpoS;box35pos=361;box35seq=gtgata;box10pos=388;box10seq=tatgat
YPK_1950	YPK_1950	acetolactate synthase catalytic subunit TIGRFAM: acetolactate synthase, large subunit, biosynthetic type~PFAM: thiamine pyrOPeronhosphate protein domain protein TPP-binding; thiamine pyrOPeronhosphate protein central region; thiamine pyrOPeronhosphate protein TPP binding domain protein~KEGG: ypm:YP_2079 pu	2165246	2166913	-	OPeron	2166913	2167413	2167650	1.97	rpoD	promoter=rpoD;box35pos=226;box35seq=gtaata;box10pos=251;box10seq=gatttt
YPK_1959	YPK_1959	hypothetical protein	2178526	2178675	+	OPeron	2178026	2178526	2178245	1.98	rpoE	promoter=rpoE;box35pos=183;box35seq=acatta;box10pos=208;box10seq=tcaaa
YPK_1959	YPK_1959	hypothetical protein	2178526	2178675	+	OPeron	2178026	2178526	2178275	1.94	rpoS	promoter=rpoS;box35pos=214;box35seq=cataca;box10pos=236;box10seq=cacact
YPK_1959	YPK_1959	hypothetical protein	2178526	2178675	+	OPeron	2178026	2178526	2178386	1.96	rpoD	promoter=rpoD;box35pos=326;box35seq=tttatt;box10pos=347;box10seq=tatgat
YPK_1967	YPK_1967	Na+/H+ antiporter NhaC PFAM: Na+/H+ antiporter NhaC~KEGG: ypi:YpsIP31758_1856 Na+/H+ antiporter NhaC	2184938	2186392	+	OPeron	2184438	2184938	2184848	1.96	rpoE	promoter=rpoE;box35pos=379;box35seq=gactct;box10pos=400;box10seq=tctca
YPK_1967	YPK_1967	Na+/H+ antiporter NhaC PFAM: Na+/H+ antiporter NhaC~KEGG: ypi:YpsIP31758_1856 Na+/H+ antiporter NhaC	2184938	2186392	+	OPeron	2184438	2184938	2184820	1.95	rpoD	promoter=rpoD;box35pos=348;box35seq=gggaaa;box10pos=370;box10seq=taaaaa
YPK_1975	YPK_1975	Fis family GAF modulated sigma54 specific transcriptional regulator PFAM: sigma-54 factor interaction domain-containing protein; helix-turn-helix Fis-type; GAF domain protein~SMART: AAA ATPase~KEGG: ypi:YpsIP31758_1863 sigma-54 dependent transcriptional regulator	2194759	2196603	+	TSS	2194257	2194757	2194660	1.98	rpoE	promoter=rpoE;box35pos=370;box35seq=gatata;box10pos=392;box10seq=tcaat
YPK_1975	YPK_1975	Fis family GAF modulated sigma54 specific transcriptional regulator PFAM: sigma-54 factor interaction domain-containing protein; helix-turn-helix Fis-type; GAF domain protein~SMART: AAA ATPase~KEGG: ypi:YpsIP31758_1863 sigma-54 dependent transcriptional regulator	2194759	2196603	+	TSS	2194257	2194757	2194671	1.96	rpoS	promoter=rpoS;box35pos=380;box35seq=tttcat;box10pos=401;box10seq=tatgat
YPK_1975	YPK_1975	Fis family GAF modulated sigma54 specific transcriptional regulator PFAM: sigma-54 factor interaction domain-containing protein; helix-turn-helix Fis-type; GAF domain protein~SMART: AAA ATPase~KEGG: ypi:YpsIP31758_1863 sigma-54 dependent transcriptional regulator	2194759	2196603	+	TSS	2194257	2194757	2194656	1.98	rpoD	promoter=rpoD;box35pos=362;box35seq=ttttag;box10pos=387;box10seq=tattat
YPK_1990	YPK_1990	hypothetical protein KEGG: yps:YPTB2182 hypothetical protein	2211970	2212899	+	OPeron	2211351	2211851	2211715	1.92	rpoE	promoter=rpoE;box35pos=334;box35seq=gcaaaa;box10pos=353;box10seq=tcaga
YPK_1990	YPK_1990	hypothetical protein KEGG: yps:YPTB2182 hypothetical protein	2211970	2212899	+	OPeron	2211351	2211851	2211604	1.94	rpoS	promoter=rpoS;box35pos=217;box35seq=gtgaaa;box10pos=240;box10seq=tattca
YPK_1990	YPK_1990	hypothetical protein KEGG: yps:YPTB2182 hypothetical protein	2211970	2212899	+	OPeron	2211351	2211851	2211673	1.95	rpoD	promoter=rpoD;box35pos=282;box35seq=gtgaac;box10pos=310;box10seq=gattgt
YPK_1993	YPK_1993	adenosine deaminase catalyzes the formation of inosine from adenosine	2214718	2215722	+	TSS	2214170	2214670	2214528	1.98	rpoE	promoter=rpoE;box35pos=323;box35seq=gcatgt;box10pos=347;box10seq=tcaat
YPK_1993	YPK_1993	adenosine deaminase catalyzes the formation of inosine from adenosine	2214718	2215722	+	TSS	2214170	2214670	2214572	1.96	rpoS	promoter=rpoS;box35pos=363;box35seq=tatata;box10pos=389;box10seq=aaattt
YPK_1993	YPK_1993	adenosine deaminase catalyzes the formation of inosine from adenosine	2214718	2215722	+	TSS	2214170	2214670	2214524	1.98	rpoD	promoter=rpoD;box35pos=314;box35seq=caaaaa;box10pos=342;box10seq=taattt
YPK_2023	YPK_2023	translation initiation factor Sui1 involved in start site selection during the initiation of translation	2252638	2252964	-	OPeron	2253701	2254201	2254412	1.98	rpoE	promoter=rpoE;box35pos=258;box35seq=aaaaat;box10pos=278;box10seq=tcaaa
YPK_2023	YPK_2023	translation initiation factor Sui1 involved in start site selection during the initiation of translation	2252638	2252964	-	OPeron	2253701	2254201	2254282	1.95	rpoS	promoter=rpoS;box35pos=380;box35seq=tatgaa;box10pos=405;box10seq=tattcc
YPK_2023	YPK_2023	translation initiation factor Sui1 involved in start site selection during the initiation of translation	2252638	2252964	-	OPeron	2253701	2254201	2254384	1.96	rpoD	promoter=rpoD;box35pos=278;box35seq=tcaaag;box10pos=304;box10seq=taacat
YPK_2070	YPK_2070	extracellular solute-binding protein PFAM: extracellular solute-binding protein family 5~KEGG: yps:YPTB2105 ABC transporter, periplasmic oligOPeroneptide-binding protein OPeronpA	2296993	2298630	-	TSS	2298904	2299404	2299669	1.98	rpoE	promoter=rpoE;box35pos=202;box35seq=aaacat;box10pos=224;box10seq=tcata
YPK_2070	YPK_2070	extracellular solute-binding protein PFAM: extracellular solute-binding protein family 5~KEGG: yps:YPTB2105 ABC transporter, periplasmic oligOPeroneptide-binding protein OPeronpA	2296993	2298630	-	TSS	2298904	2299404	2299558	1.96	rpoS	promoter=rpoS;box35pos=307;box35seq=gtgaac;box10pos=335;box10seq=taaatt
YPK_2070	YPK_2070	extracellular solute-binding protein PFAM: extracellular solute-binding protein family 5~KEGG: yps:YPTB2105 ABC transporter, periplasmic oligOPeroneptide-binding protein OPeronpA	2296993	2298630	-	TSS	2298904	2299404	2299557	1.97	rpoD	promoter=rpoD;box35pos=314;box35seq=ttttaa;box10pos=335;box10seq=taaatt
YPK_2071	YPK_2071	hypothetical protein PFAM: multiple antibiotic resistance (MarC)-related protein~KEGG: ypi:YpsIP31758_1962 hypothetical protein	2299467	2300111	-	SGene	2300111	2300611	2300769	1.96	rpoE	promoter=rpoE;box35pos=309;box35seq=aatcct;box10pos=331;box10seq=tccct
YPK_2071	YPK_2071	hypothetical protein PFAM: multiple antibiotic resistance (MarC)-related protein~KEGG: ypi:YpsIP31758_1962 hypothetical protein	2299467	2300111	-	SGene	2300111	2300611	2300748	1.94	rpoS	promoter=rpoS;box35pos=326;box35seq=cctcat;box10pos=350;box10seq=taaaaa
YPK_2071	YPK_2071	hypothetical protein PFAM: multiple antibiotic resistance (MarC)-related protein~KEGG: ypi:YpsIP31758_1962 hypothetical protein	2299467	2300111	-	SGene	2300111	2300611	2300661	1.96	rpoD	promoter=rpoD;box35pos=411;box35seq=taggaa;box10pos=438;box10seq=tataat
YPK_2072	YPK_2072	bifunctional acetaldehyde-CoA/alcohol dehydrogenase PFAM: iron-containing alcohol dehydrogenase; Aldehyde Dehydrogenase_~KEGG: ypm:YP_1976 aldehyde-alcohol dehydrogenase	2300981	2303656	+	TSS	2300248	2300748	2300580	1.97	rpoE	promoter=rpoE;box35pos=296;box35seq=gcattt;box10pos=321;box10seq=tcgtt
YPK_2072	YPK_2072	bifunctional acetaldehyde-CoA/alcohol dehydrogenase PFAM: iron-containing alcohol dehydrogenase; Aldehyde Dehydrogenase_~KEGG: ypm:YP_1976 aldehyde-alcohol dehydrogenase	2300981	2303656	+	TSS	2300248	2300748	2300586	1.96	rpoS	promoter=rpoS;box35pos=299;box35seq=tttata;box10pos=325;box10seq=taaaat
YPK_2072	YPK_2072	bifunctional acetaldehyde-CoA/alcohol dehydrogenase PFAM: iron-containing alcohol dehydrogenase; Aldehyde Dehydrogenase_~KEGG: ypm:YP_1976 aldehyde-alcohol dehydrogenase	2300981	2303656	+	TSS	2300248	2300748	2300586	1.96	rpoD	promoter=rpoD;box35pos=299;box35seq=tttata;box10pos=325;box10seq=taaaat
YPK_2074	YPK_2074	global DNA-binding transcriptional dual regulator H-NS PFAM: histone family protein nucleoid-structuring protein H-NS~KEGG: ypi:YpsIP31758_1966 DNA-binding protein H-NS	2305747	2306154	+	TSS	2305210	2305710	2305427	1.97	rpoE	promoter=rpoE;box35pos=184;box35seq=gactta;box10pos=207;box10seq=actat
YPK_2074	YPK_2074	global DNA-binding transcriptional dual regulator H-NS PFAM: histone family protein nucleoid-structuring protein H-NS~KEGG: ypi:YpsIP31758_1966 DNA-binding protein H-NS	2305747	2306154	+	TSS	2305210	2305710	2305411	1.95	rpoS	promoter=rpoS;box35pos=164;box35seq=ctcaat;box10pos=188;box10seq=tactct
YPK_2074	YPK_2074	global DNA-binding transcriptional dual regulator H-NS PFAM: histone family protein nucleoid-structuring protein H-NS~KEGG: ypi:YpsIP31758_1966 DNA-binding protein H-NS	2305747	2306154	+	TSS	2305210	2305710	2305658	1.96	rpoD	promoter=rpoD;box35pos=409;box35seq=ctggct;box10pos=436;box10seq=taaatt
YPK_2094	YPK_2094	hypothetical protein PFAM: protein of unknown function DUF1315~KEGG: ypp:YPDSF_0975 hypothetical protein	2323904	2324278	-	OPeron	2324660	2325160	2325324	1.94	rpoE	promoter=rpoE;box35pos=300;box35seq=taattt;box10pos=325;box10seq=actaa
YPK_2094	YPK_2094	hypothetical protein PFAM: protein of unknown function DUF1315~KEGG: ypp:YPDSF_0975 hypothetical protein	2323904	2324278	-	OPeron	2324660	2325160	2325347	1.95	rpoS	promoter=rpoS;box35pos=278;box35seq=ttgacg;box10pos=300;box10seq=taattt
YPK_2094	YPK_2094	hypothetical protein PFAM: protein of unknown function DUF1315~KEGG: ypp:YPDSF_0975 hypothetical protein	2323904	2324278	-	OPeron	2324660	2325160	2325348	1.91	rpoD	promoter=rpoD;box35pos=278;box35seq=ttgacg;box10pos=300;box10seq=taattt
YPK_2096	YPK_2096	glyceraldehyde-3-phosphate dehydrogenase KEGG: ypm:YP_1957 glyceraldehyde 3-phosphate dehydrogenase A~TIGRFAM: glyceraldehyde-3-phosphate dehydrogenase, type I~PFAM: glyceraldehyde 3-phosphate dehydrogenase	2325008	2326003	+	TSS	2324262	2324762	2324568	1.92	rpoS	promoter=rpoS;box35pos=265;box35seq=ttggta;box10pos=293;box10seq=aacaat
YPK_2096	YPK_2096	glyceraldehyde-3-phosphate dehydrogenase KEGG: ypm:YP_1957 glyceraldehyde 3-phosphate dehydrogenase A~TIGRFAM: glyceraldehyde-3-phosphate dehydrogenase, type I~PFAM: glyceraldehyde 3-phosphate dehydrogenase	2325008	2326003	+	TSS	2324262	2324762	2324644	1.91	rpoD	promoter=rpoD;box35pos=346;box35seq=ctgaat;box10pos=369;box10seq=tatttt
YPK_2097	YPK_2097	aldose 1-epimerase PFAM: Aldose 1-epimerase~KEGG: ypm:YP_1956 uncharacterized enzyme related to aldose 1-epimerase	2326327	2327202	+	TSS	2325780	2326280	2326186	1.93	rpoE	promoter=rpoE;box35pos=376;box35seq=taagta;box10pos=395;box10seq=tctca
YPK_2097	YPK_2097	aldose 1-epimerase PFAM: Aldose 1-epimerase~KEGG: ypm:YP_1956 uncharacterized enzyme related to aldose 1-epimerase	2326327	2327202	+	TSS	2325780	2326280	2326183	1.95	rpoS	promoter=rpoS;box35pos=366;box35seq=ctgatt;box10pos=390;box10seq=taacat
YPK_2097	YPK_2097	aldose 1-epimerase PFAM: Aldose 1-epimerase~KEGG: ypm:YP_1956 uncharacterized enzyme related to aldose 1-epimerase	2326327	2327202	+	TSS	2325780	2326280	2326123	1.93	rpoD	promoter=rpoD;box35pos=308;box35seq=ttccca;box10pos=331;box10seq=tacgtt
YPK_2098	YPK_2098	MltA-interacting MipA family protein PFAM: MltA-interacting MipA family protein~KEGG: ypi:YpsIP31758_1990 MltA-interacting protein	2327275	2328045	-	TSS	2328079	2328579	2328827	1.98	rpoE	promoter=rpoE;box35pos=221;box35seq=aaataa;box10pos=241;box10seq=tctaa
YPK_2098	YPK_2098	MltA-interacting MipA family protein PFAM: MltA-interacting MipA family protein~KEGG: ypi:YpsIP31758_1990 MltA-interacting protein	2327275	2328045	-	TSS	2328079	2328579	2328831	1.95	rpoS	promoter=rpoS;box35pos=211;box35seq=tttaat;box10pos=235;box10seq=tattgt
YPK_2098	YPK_2098	MltA-interacting MipA family protein PFAM: MltA-interacting MipA family protein~KEGG: ypi:YpsIP31758_1990 MltA-interacting protein	2327275	2328045	-	TSS	2328079	2328579	2328851	1.96	rpoD	promoter=rpoD;box35pos=190;box35seq=gacaat;box10pos=217;box10seq=tactaa
YPK_2101	YPK_2101	hypothetical protein	2330446	2330568	+	OPeron	2327968	2328468	2328331	1.98	rpoE	promoter=rpoE;box35pos=332;box35seq=aaataa;box10pos=352;box10seq=tctaa
YPK_2101	YPK_2101	hypothetical protein	2330446	2330568	+	OPeron	2327968	2328468	2328327	1.95	rpoS	promoter=rpoS;box35pos=322;box35seq=tttaat;box10pos=346;box10seq=tattgt
YPK_2101	YPK_2101	hypothetical protein	2330446	2330568	+	OPeron	2327968	2328468	2328227	1.96	rpoD	promoter=rpoD;box35pos=226;box35seq=tttacg;box10pos=247;box10seq=taaaat
YPK_2118	YPK_2118	hypothetical protein PFAM: fumarylacetoacetate (FAA) hydrolase~KEGG: ypk:y2229 isomerase	2349019	2349675	-	OPeron	2350831	2351331	2351461	1.93	rpoE	promoter=rpoE;box35pos=341;box35seq=gaaaaa;box10pos=359;box10seq=tcaat
YPK_2118	YPK_2118	hypothetical protein PFAM: fumarylacetoacetate (FAA) hydrolase~KEGG: ypk:y2229 isomerase	2349019	2349675	-	OPeron	2350831	2351331	2351476	1.93	rpoS	promoter=rpoS;box35pos=314;box35seq=ctggct;box10pos=342;box10seq=aaaaat
YPK_2118	YPK_2118	hypothetical protein PFAM: fumarylacetoacetate (FAA) hydrolase~KEGG: ypk:y2229 isomerase	2349019	2349675	-	OPeron	2350831	2351331	2351385	1.96	rpoD	promoter=rpoD;box35pos=412;box35seq=catgtt;box10pos=434;box10seq=taaatt
YPK_2123	minE	cell division tOPeronological specificity factor MinE works in conjunction with MinC and MinD to enable cell division at the midpoint of the long axis of the cell	2353492	2353761	+	OPeron	2351465	2351965	2351792	1.98	rpoE	promoter=rpoE;box35pos=295;box35seq=aaatat;box10pos=316;box10seq=gcgaa
YPK_2123	minE	cell division tOPeronological specificity factor MinE works in conjunction with MinC and MinD to enable cell division at the midpoint of the long axis of the cell	2353492	2353761	+	OPeron	2351465	2351965	2351875	1.95	rpoS	promoter=rpoS;box35pos=370;box35seq=tttaag;box10pos=397;box10seq=tagatt
YPK_2123	minE	cell division tOPeronological specificity factor MinE works in conjunction with MinC and MinD to enable cell division at the midpoint of the long axis of the cell	2353492	2353761	+	OPeron	2351465	2351965	2351860	1.96	rpoD	promoter=rpoD;box35pos=355;box35seq=tggaat;box10pos=383;box10seq=tatatt
YPK_2136	YPK_2136	pyruvate kinase catalyzes the formation of phosphoenolpyruvate from pyruvate	2367143	2368585	+	SGene	2366643	2367143	2367077	1.91	rpoS	promoter=rpoS;box35pos=395;box35seq=ttgaca;box10pos=421;box10seq=tagatt
YPK_2136	YPK_2136	pyruvate kinase catalyzes the formation of phosphoenolpyruvate from pyruvate	2367143	2368585	+	SGene	2366643	2367143	2367067	1.96	rpoD	promoter=rpoD;box35pos=387;box35seq=taacat;box10pos=412;box10seq=taaaat
YPK_2146	YPK_2146	hypothetical protein PFAM: protein of unknown function DUF28~KEGG: ypi:YpsIP31758_2033 conserved hypothetical protein TIGR01033	2376936	2377679	-	OPeron	2379976	2380476	2380746	1.92	rpoS	promoter=rpoS;box35pos=196;box35seq=tttatt;box10pos=217;box10seq=tatgtt
YPK_2146	YPK_2146	hypothetical protein PFAM: protein of unknown function DUF28~KEGG: ypi:YpsIP31758_2033 conserved hypothetical protein TIGR01033	2376936	2377679	-	OPeron	2379976	2380476	2380766	1.96	rpoD	promoter=rpoD;box35pos=177;box35seq=gtgttc;box10pos=198;box10seq=tattgt
YPK_2161	YPK_2161	ribosomal-protein-S5-alanine N-acetyltransferase PFAM: GCN5-related N-acetyltransferase~KEGG: ypi:YpsIP31758_2049 ribosomal-protein-alanine acetyltransferase	2398818	2399402	-	TSS	2399435	2399935	2400209	1.97	rpoE	promoter=rpoE;box35pos=194;box35seq=caattt;box10pos=215;box10seq=gccta
YPK_2161	YPK_2161	ribosomal-protein-S5-alanine N-acetyltransferase PFAM: GCN5-related N-acetyltransferase~KEGG: ypi:YpsIP31758_2049 ribosomal-protein-alanine acetyltransferase	2398818	2399402	-	TSS	2399435	2399935	2400041	1.96	rpoS	promoter=rpoS;box35pos=359;box35seq=tttcta;box10pos=383;box10seq=taggtt
YPK_2161	YPK_2161	ribosomal-protein-S5-alanine N-acetyltransferase PFAM: GCN5-related N-acetyltransferase~KEGG: ypi:YpsIP31758_2049 ribosomal-protein-alanine acetyltransferase	2398818	2399402	-	TSS	2399435	2399935	2400110	1.94	rpoD	promoter=rpoD;box35pos=290;box35seq=tgggta;box10pos=313;box10seq=gataat
YPK_2182	ipk	4-diphosphocytidyl-2-C-methyl-D-erythritol kinase An essential enzyme in the nonmevalonate pathway of isOPeronentenyl diphosphate and dimethylallyl diphosphate biosynthesis	2421027	2421959	+	OPeron	2419902	2420402	2420230	1.96	rpoD	promoter=rpoD;box35pos=289;box35seq=catcct;box10pos=315;box10seq=cacaat
YPK_2194	YPK_2194	carboxymuconolactone decarboxylase PFAM: Carboxymuconolactone decarboxylase~KEGG: ypm:YP_1846 putative decarboxylase	2432342	2432764	+	OPeron	2431842	2432342	2432145	1.96	rpoE	promoter=rpoE;box35pos=269;box35seq=ggcctg;box10pos=292;box10seq=tctat
YPK_2194	YPK_2194	carboxymuconolactone decarboxylase PFAM: Carboxymuconolactone decarboxylase~KEGG: ypm:YP_1846 putative decarboxylase	2432342	2432764	+	OPeron	2431842	2432342	2432237	1.94	rpoS	promoter=rpoS;box35pos=358;box35seq=tttacg;box10pos=382;box10seq=aattct
YPK_2194	YPK_2194	carboxymuconolactone decarboxylase PFAM: Carboxymuconolactone decarboxylase~KEGG: ypm:YP_1846 putative decarboxylase	2432342	2432764	+	OPeron	2431842	2432342	2432158	1.97	rpoD	promoter=rpoD;box35pos=277;box35seq=tgagcg;box10pos=304;box10seq=tatttt
YPK_2196	YPK_2196	hypothetical protein KEGG: ypi:YpsIP31758_2089 hypothetical protein	2433502	2434575	+	TSS	2432976	2433476	2433410	1.94	rpoE	promoter=rpoE;box35pos=400;box35seq=aaacat;box10pos=423;box10seq=tccgt
YPK_2196	YPK_2196	hypothetical protein KEGG: ypi:YpsIP31758_2089 hypothetical protein	2433502	2434575	+	TSS	2432976	2433476	2433351	1.92	rpoS	promoter=rpoS;box35pos=340;box35seq=ctgaaa;box10pos=362;box10seq=tattca
YPK_2196	YPK_2196	hypothetical protein KEGG: ypi:YpsIP31758_2089 hypothetical protein	2433502	2434575	+	TSS	2432976	2433476	2433303	1.97	rpoD	promoter=rpoD;box35pos=288;box35seq=gtcaca;box10pos=315;box10seq=taaaat
YPK_2199	YPK_2199	hypothetical protein KEGG: ypi:YpsIP31758_2092 hypothetical protein	2437185	2438135	+	OPeron	2434855	2435355	2435173	1.98	rpoE	promoter=rpoE;box35pos=284;box35seq=aaacta;box10pos=307;box10seq=tctaa
YPK_2199	YPK_2199	hypothetical protein KEGG: ypi:YpsIP31758_2092 hypothetical protein	2437185	2438135	+	OPeron	2434855	2435355	2435137	1.96	rpoS	promoter=rpoS;box35pos=248;box35seq=ttaaca;box10pos=269;box10seq=tacgat
YPK_2199	YPK_2199	hypothetical protein KEGG: ypi:YpsIP31758_2092 hypothetical protein	2437185	2438135	+	OPeron	2434855	2435355	2435086	1.97	rpoD	promoter=rpoD;box35pos=197;box35seq=ttcata;box10pos=219;box10seq=cacaat
YPK_2200	YPK_2200	hypothetical protein	2438181	2438324	+	TSS	2437597	2438097	2438047	1.96	rpoE	promoter=rpoE;box35pos=414;box35seq=aaaggt;box10pos=439;box10seq=gcatt
YPK_2200	YPK_2200	hypothetical protein	2438181	2438324	+	TSS	2437597	2438097	2438029	1.94	rpoS	promoter=rpoS;box35pos=392;box35seq=tttact;box10pos=419;box10seq=taatgt
YPK_2200	YPK_2200	hypothetical protein	2438181	2438324	+	TSS	2437597	2438097	2437897	1.96	rpoD	promoter=rpoD;box35pos=263;box35seq=gcgcta;box10pos=288;box10seq=tataac
YPK_2223	YPK_2223	N-formylglutamate amidohydrolase PFAM: N-formylglutamate amidohydrolase~KEGG: ypi:YpsIP31758_2114 N-formylglutamate amidohydrolase	2463580	2464386	+	OPeron	2461863	2462363	2462081	1.98	rpoE	promoter=rpoE;box35pos=185;box35seq=gccgta;box10pos=208;box10seq=gccat
YPK_2223	YPK_2223	N-formylglutamate amidohydrolase PFAM: N-formylglutamate amidohydrolase~KEGG: ypi:YpsIP31758_2114 N-formylglutamate amidohydrolase	2463580	2464386	+	OPeron	2461863	2462363	2462301	1.93	rpoS	promoter=rpoS;box35pos=397;box35seq=tataca;box10pos=425;box10seq=aatgat
YPK_2223	YPK_2223	N-formylglutamate amidohydrolase PFAM: N-formylglutamate amidohydrolase~KEGG: ypi:YpsIP31758_2114 N-formylglutamate amidohydrolase	2463580	2464386	+	OPeron	2461863	2462363	2462262	1.94	rpoD	promoter=rpoD;box35pos=364;box35seq=gtgaat;box10pos=387;box10seq=catgat
YPK_2224	YPK_2224	porin PFAM: porin Gram-negative type~KEGG: ypi:YpsIP31758_2115 outer membrane protein N	2464981	2466063	-	SGene	2466063	2466563	2466837	1.98	rpoE	promoter=rpoE;box35pos=196;box35seq=gcaatt;box10pos=215;box10seq=tcaga
YPK_2224	YPK_2224	porin PFAM: porin Gram-negative type~KEGG: ypi:YpsIP31758_2115 outer membrane protein N	2464981	2466063	-	SGene	2466063	2466563	2466727	1.96	rpoS	promoter=rpoS;box35pos=300;box35seq=tttaat;box10pos=323;box10seq=tactca
YPK_2224	YPK_2224	porin PFAM: porin Gram-negative type~KEGG: ypi:YpsIP31758_2115 outer membrane protein N	2464981	2466063	-	SGene	2466063	2466563	2466616	1.97	rpoD	promoter=rpoD;box35pos=413;box35seq=ttgctg;box10pos=435;box10seq=tatcat
YPK_2229	YPK_2229	bifunctional succinylornithine transaminase/acetylornithine transaminase catalyzes the transamination of 2-N-succinylornithine and alpha-ketoglutarate into 2-N-succinylglutamate semialdehyde and glutamate; also functions as the catabolic acetylornithine aminotransferase catalyzing the formation of 2-N-acetylglutamate semialdeh	2471837	2473177	-	OPeron	2473177	2473677	2473936	1.98	rpoE	promoter=rpoE;box35pos=205;box35seq=taattt;box10pos=230;box10seq=tcaca
YPK_2229	YPK_2229	bifunctional succinylornithine transaminase/acetylornithine transaminase catalyzes the transamination of 2-N-succinylornithine and alpha-ketoglutarate into 2-N-succinylglutamate semialdehyde and glutamate; also functions as the catabolic acetylornithine aminotransferase catalyzing the formation of 2-N-acetylglutamate semialdeh	2471837	2473177	-	OPeron	2473177	2473677	2473959	1.96	rpoS	promoter=rpoS;box35pos=182;box35seq=gcgaaa;box10pos=205;box10seq=taattt
YPK_2229	YPK_2229	bifunctional succinylornithine transaminase/acetylornithine transaminase catalyzes the transamination of 2-N-succinylornithine and alpha-ketoglutarate into 2-N-succinylglutamate semialdehyde and glutamate; also functions as the catabolic acetylornithine aminotransferase catalyzing the formation of 2-N-acetylglutamate semialdeh	2471837	2473177	-	OPeron	2473177	2473677	2473924	1.96	rpoD	promoter=rpoD;box35pos=217;box35seq=ttgctc;box10pos=241;box10seq=caacat
YPK_2241	hmsH	outer membrane protein in Yersinia this protein is important for biofilm formation and hemin adsorption	2486293	2488767	-	OPeron	2488767	2489267	2489467	1.98	rpoE	promoter=rpoE;box35pos=267;box35seq=aaaata;box10pos=288;box10seq=actaa
YPK_2241	hmsH	outer membrane protein in Yersinia this protein is important for biofilm formation and hemin adsorption	2486293	2488767	-	OPeron	2488767	2489267	2489448	1.96	rpoS	promoter=rpoS;box35pos=285;box35seq=tttact;box10pos=306;box10seq=tacagt
YPK_2241	hmsH	outer membrane protein in Yersinia this protein is important for biofilm formation and hemin adsorption	2486293	2488767	-	OPeron	2488767	2489267	2489514	1.98	rpoD	promoter=rpoD;box35pos=216;box35seq=ttaaaa;box10pos=240;box10seq=tagatt
YPK_2250	YPK_2250	hypothetical protein	2497267	2497404	-	OPeron	2497404	2497904	2498194	1.93	rpoS	promoter=rpoS;box35pos=171;box35seq=tttcca;box10pos=197;box10seq=cactgt
YPK_2250	YPK_2250	hypothetical protein	2497267	2497404	-	OPeron	2497404	2497904	2498111	1.97	rpoD	promoter=rpoD;box35pos=255;box35seq=tttata;box10pos=281;box10seq=taatat
YPK_2257	YPK_2257	GntR family transcriptional regulator PFAM: aminotransferase class I and II~KEGG: ypi:YpsIP31758_2148 aminotransferase, class I and II	2508008	2509192	-	SGene	2509192	2509692	2509922	1.98	rpoE	promoter=rpoE;box35pos=238;box35seq=aaatgt;box10pos=259;box10seq=tctaa
YPK_2257	YPK_2257	GntR family transcriptional regulator PFAM: aminotransferase class I and II~KEGG: ypi:YpsIP31758_2148 aminotransferase, class I and II	2508008	2509192	-	SGene	2509192	2509692	2509866	1.95	rpoS	promoter=rpoS;box35pos=285;box35seq=tattaa;box10pos=313;box10seq=tacaat
YPK_2257	YPK_2257	GntR family transcriptional regulator PFAM: aminotransferase class I and II~KEGG: ypi:YpsIP31758_2148 aminotransferase, class I and II	2508008	2509192	-	SGene	2509192	2509692	2509919	1.96	rpoD	promoter=rpoD;box35pos=233;box35seq=tcacca;box10pos=261;box10seq=taaaaa
YPK_2258	YPK_2258	Na(+)-translocating NADH-quinone reductase subunit E Part of the NQR complex which has six subunits NqrA, NqrB, NqrC, NqrD, NqrE and NqrF. NQR complex catalyzes the reduction of ubiquinone-1 to ubiquinol by two successive reactions, coupled with the transport of Na(+) ions from the cytOPeronlasm to the periplas	2509544	2510143	+	SGene	2509044	2509544	2509462	1.98	rpoE	promoter=rpoE;box35pos=386;box35seq=aaatgt;box10pos=407;box10seq=tctaa
YPK_2258	YPK_2258	Na(+)-translocating NADH-quinone reductase subunit E Part of the NQR complex which has six subunits NqrA, NqrB, NqrC, NqrD, NqrE and NqrF. NQR complex catalyzes the reduction of ubiquinone-1 to ubiquinol by two successive reactions, coupled with the transport of Na(+) ions from the cytOPeronlasm to the periplas	2509544	2510143	+	SGene	2509044	2509544	2509304	1.95	rpoS	promoter=rpoS;box35pos=225;box35seq=tttcac;box10pos=247;box10seq=aacact
YPK_2258	YPK_2258	Na(+)-translocating NADH-quinone reductase subunit E Part of the NQR complex which has six subunits NqrA, NqrB, NqrC, NqrD, NqrE and NqrF. NQR complex catalyzes the reduction of ubiquinone-1 to ubiquinol by two successive reactions, coupled with the transport of Na(+) ions from the cytOPeronlasm to the periplas	2509544	2510143	+	SGene	2509044	2509544	2509465	1.96	rpoD	promoter=rpoD;box35pos=381;box35seq=tcacca;box10pos=409;box10seq=taaaaa
YPK_2284	YPK_2284	GntR family transcriptional regulator PFAM: regulatory protein GntR HTH; UbiC transcription regulator-associated domain protein~KEGG: ypm:YP_1504 GntR-family putative transcriptional regulatory protein	2537261	2538058	-	SGene	2538058	2538558	2538849	1.96	rpoE	promoter=rpoE;box35pos=177;box35seq=taatag;box10pos=198;box10seq=gcgga
YPK_2284	YPK_2284	GntR family transcriptional regulator PFAM: regulatory protein GntR HTH; UbiC transcription regulator-associated domain protein~KEGG: ypm:YP_1504 GntR-family putative transcriptional regulatory protein	2537261	2538058	-	SGene	2538058	2538558	2538610	1.91	rpoS	promoter=rpoS;box35pos=407;box35seq=gtcaaa;box10pos=435;box10seq=taagct
YPK_2284	YPK_2284	GntR family transcriptional regulator PFAM: regulatory protein GntR HTH; UbiC transcription regulator-associated domain protein~KEGG: ypm:YP_1504 GntR-family putative transcriptional regulatory protein	2537261	2538058	-	SGene	2538058	2538558	2538799	1.96	rpoD	promoter=rpoD;box35pos=219;box35seq=tttacg;box10pos=247;box10seq=taagaa
YPK_2296	YPK_2296	baseplate assembly protein V PFAM: baseplate assembly protein V~KEGG: ypm:YP_1511 hypothetical protein	2543422	2543781	+	OPeron	2542922	2543422	2543243	1.92	rpoE	promoter=rpoE;box35pos=285;box35seq=gaatac;box10pos=310;box10seq=tcaat
YPK_2296	YPK_2296	baseplate assembly protein V PFAM: baseplate assembly protein V~KEGG: ypm:YP_1511 hypothetical protein	2543422	2543781	+	OPeron	2542922	2543422	2543231	1.9	rpoS	promoter=rpoS;box35pos=268;box35seq=ttgccg;box10pos=296;box10seq=tatgta
YPK_2296	YPK_2296	baseplate assembly protein V PFAM: baseplate assembly protein V~KEGG: ypm:YP_1511 hypothetical protein	2543422	2543781	+	OPeron	2542922	2543422	2543225	1.94	rpoD	promoter=rpoD;box35pos=268;box35seq=ttgccg;box10pos=291;box10seq=caacat
YPK_2297	YPK_2297	GPW/gp25 family protein PFAM: GPW/gp25 family protein~KEGG: ypm:YP_1512 hypothetical protein	2543778	2544077	+	OPeron	2542922	2543422	2543243	1.92	rpoE	promoter=rpoE;box35pos=285;box35seq=gaatac;box10pos=310;box10seq=tcaat
YPK_2297	YPK_2297	GPW/gp25 family protein PFAM: GPW/gp25 family protein~KEGG: ypm:YP_1512 hypothetical protein	2543778	2544077	+	OPeron	2542922	2543422	2543231	1.9	rpoS	promoter=rpoS;box35pos=268;box35seq=ttgccg;box10pos=296;box10seq=tatgta
YPK_2297	YPK_2297	GPW/gp25 family protein PFAM: GPW/gp25 family protein~KEGG: ypm:YP_1512 hypothetical protein	2543778	2544077	+	OPeron	2542922	2543422	2543225	1.94	rpoD	promoter=rpoD;box35pos=268;box35seq=ttgccg;box10pos=291;box10seq=caacat
YPK_2300	YPK_2300	tail sheath protein PFAM: tail sheath protein~KEGG: ypi:YpsIP31758_2187 tail sheath protein	2545760	2546929	+	OPeron	2545260	2545760	2545638	1.92	rpoE	promoter=rpoE;box35pos=342;box35seq=tcactt;box10pos=367;box10seq=tctat
YPK_2300	YPK_2300	tail sheath protein PFAM: tail sheath protein~KEGG: ypi:YpsIP31758_2187 tail sheath protein	2545760	2546929	+	OPeron	2545260	2545760	2545552	1.92	rpoS	promoter=rpoS;box35pos=254;box35seq=ttgtcg;box10pos=279;box10seq=tattat
YPK_2300	YPK_2300	tail sheath protein PFAM: tail sheath protein~KEGG: ypi:YpsIP31758_2187 tail sheath protein	2545760	2546929	+	OPeron	2545260	2545760	2545569	1.94	rpoD	promoter=rpoD;box35pos=274;box35seq=gtgctt;box10pos=297;box10seq=taagtt
YPK_2301	YPK_2301	phage major tail tube protein TIGRFAM: phage major tail tube protein~PFAM: major tail tube protein~KEGG: ypi:YpsIP31758_2188 tail tube protein	2546941	2547456	+	OPeron	2545260	2545760	2545638	1.92	rpoE	promoter=rpoE;box35pos=342;box35seq=tcactt;box10pos=367;box10seq=tctat
YPK_2301	YPK_2301	phage major tail tube protein TIGRFAM: phage major tail tube protein~PFAM: major tail tube protein~KEGG: ypi:YpsIP31758_2188 tail tube protein	2546941	2547456	+	OPeron	2545260	2545760	2545552	1.92	rpoS	promoter=rpoS;box35pos=254;box35seq=ttgtcg;box10pos=279;box10seq=tattat
YPK_2301	YPK_2301	phage major tail tube protein TIGRFAM: phage major tail tube protein~PFAM: major tail tube protein~KEGG: ypi:YpsIP31758_2188 tail tube protein	2546941	2547456	+	OPeron	2545260	2545760	2545569	1.94	rpoD	promoter=rpoD;box35pos=274;box35seq=gtgctt;box10pos=297;box10seq=taagtt
YPK_2310	YPK_2310	XRE family transcriptional regulator SMART: helix-turn-helix domain protein~KEGG: ecs:ECs2620 putative transcriptional regulator	2555352	2555744	-	TSS	2555798	2556298	2556583	1.92	rpoS	promoter=rpoS;box35pos=180;box35seq=tttact;box10pos=202;box10seq=tattca
YPK_2310	YPK_2310	XRE family transcriptional regulator SMART: helix-turn-helix domain protein~KEGG: ecs:ECs2620 putative transcriptional regulator	2555352	2555744	-	TSS	2555798	2556298	2556551	1.91	rpoD	promoter=rpoD;box35pos=214;box35seq=ttgata;box10pos=235;box10seq=taatgt
YPK_2316	YPK_2316	hypothetical protein KEGG: yps:YPTB1867 hypothetical protein	2556901	2557161	+	OPeron	2555323	2555823	2555752	1.96	rpoE	promoter=rpoE;box35pos=397;box35seq=aaacgc;box10pos=418;box10seq=tccat
YPK_2316	YPK_2316	hypothetical protein KEGG: yps:YPTB1867 hypothetical protein	2556901	2557161	+	OPeron	2555323	2555823	2555646	1.93	rpoD	promoter=rpoD;box35pos=286;box35seq=gcgtca;box10pos=311;box10seq=catact
YPK_2318	YPK_2318	hypothetical protein KEGG: yps:YPTB1865 hypothetical protein	2557580	2558341	+	OPeron	2557080	2557580	2557514	1.95	rpoE	promoter=rpoE;box35pos=403;box35seq=gaaaga;box10pos=424;box10seq=tcgca
YPK_2318	YPK_2318	hypothetical protein KEGG: yps:YPTB1865 hypothetical protein	2557580	2558341	+	OPeron	2557080	2557580	2557507	1.94	rpoS	promoter=rpoS;box35pos=388;box35seq=tttaaa;box10pos=414;box10seq=tataaa
YPK_2318	YPK_2318	hypothetical protein KEGG: yps:YPTB1865 hypothetical protein	2557580	2558341	+	OPeron	2557080	2557580	2557482	1.97	rpoD	promoter=rpoD;box35pos=365;box35seq=gcggcg;box10pos=390;box10seq=taaatt
YPK_2324	YPK_2324	putative bacteriOPeronhage protein GP46 KEGG: yps:YPTB1861 putative bacteriOPeronhage protein GP46	2563486	2563830	+	OPeron	2557080	2557580	2557514	1.95	rpoE	promoter=rpoE;box35pos=403;box35seq=gaaaga;box10pos=424;box10seq=tcgca
YPK_2324	YPK_2324	putative bacteriOPeronhage protein GP46 KEGG: yps:YPTB1861 putative bacteriOPeronhage protein GP46	2563486	2563830	+	OPeron	2557080	2557580	2557507	1.94	rpoS	promoter=rpoS;box35pos=388;box35seq=tttaaa;box10pos=414;box10seq=tataaa
YPK_2324	YPK_2324	putative bacteriOPeronhage protein GP46 KEGG: yps:YPTB1861 putative bacteriOPeronhage protein GP46	2563486	2563830	+	OPeron	2557080	2557580	2557482	1.97	rpoD	promoter=rpoD;box35pos=365;box35seq=gcggcg;box10pos=390;box10seq=taaatt
YPK_2328	YPK_2328	capsid scaffolding PFAM: capsid scaffolding~KEGG: yps:YPTB1858 similar to V protein phage 186	2568200	2569015	+	OPeron	2567700	2568200	2568060	1.93	rpoD	promoter=rpoD;box35pos=324;box35seq=tttcca;box10pos=347;box10seq=tattac
YPK_2339	YPK_2339	hypothetical protein KEGG: yps:YPTB1848 hypothetical protein	2574261	2574962	+	SGene	2573761	2574261	2574029	1.98	rpoE	promoter=rpoE;box35pos=235;box35seq=gaataa;box10pos=258;box10seq=tcata
YPK_2339	YPK_2339	hypothetical protein KEGG: yps:YPTB1848 hypothetical protein	2574261	2574962	+	SGene	2573761	2574261	2574035	1.95	rpoS	promoter=rpoS;box35pos=238;box35seq=taaaag;box10pos=261;box10seq=taaaat
YPK_2339	YPK_2339	hypothetical protein KEGG: yps:YPTB1848 hypothetical protein	2574261	2574962	+	SGene	2573761	2574261	2573970	1.97	rpoD	promoter=rpoD;box35pos=176;box35seq=tctata;box10pos=197;box10seq=tattat
YPK_2352	YPK_2352	late control D family protein PFAM: late control D family protein~KEGG: yps:YPTB1835 bacteriOPeronhage P2 gpD protein	2585468	2586562	+	OPeron	2581580	2582080	2581849	1.9	rpoD	promoter=rpoD;box35pos=234;box35seq=gtgctg;box10pos=257;box10seq=taacct
YPK_2363	YPK_2363	TrpR binding protein WrbA stationary phase protein that binds TrpR repressor	2597370	2597969	+	SGene	2596870	2597370	2597182	1.97	rpoE	promoter=rpoE;box35pos=280;box35seq=gaagca;box10pos=301;box10seq=gctga
YPK_2363	YPK_2363	TrpR binding protein WrbA stationary phase protein that binds TrpR repressor	2597370	2597969	+	SGene	2596870	2597370	2597174	1.95	rpoS	promoter=rpoS;box35pos=267;box35seq=gtgata;box10pos=291;box10seq=tatatt
YPK_2363	YPK_2363	TrpR binding protein WrbA stationary phase protein that binds TrpR repressor	2597370	2597969	+	SGene	2596870	2597370	2597127	1.97	rpoD	promoter=rpoD;box35pos=223;box35seq=tattaa;box10pos=245;box10seq=caatat
YPK_2379	YPK_2379	hypothetical protein KEGG: ypi:YpsIP31758_2279 hypothetical protein	2613390	2613542	-	OPeron	2613542	2614042	2614252	1.9	rpoD	promoter=rpoD;box35pos=255;box35seq=ttcaat;box10pos=278;box10seq=tacctt
YPK_2411	YPK_2411	monosaccharide-transporting ATPase PFAM: inner-membrane translocator~KEGG: ypp:YPDSF_1312 sugar transport system permease protein	2642715	2643794	-	OPeron	2645990	2646490	2646567	1.93	rpoE	promoter=rpoE;box35pos=387;box35seq=aactat;box10pos=412;box10seq=gcgga
YPK_2411	YPK_2411	monosaccharide-transporting ATPase PFAM: inner-membrane translocator~KEGG: ypp:YPDSF_1312 sugar transport system permease protein	2642715	2643794	-	OPeron	2645990	2646490	2646774	1.94	rpoS	promoter=rpoS;box35pos=176;box35seq=ccgatc;box10pos=203;box10seq=tattca
YPK_2411	YPK_2411	monosaccharide-transporting ATPase PFAM: inner-membrane translocator~KEGG: ypp:YPDSF_1312 sugar transport system permease protein	2642715	2643794	-	OPeron	2645990	2646490	2646775	1.96	rpoD	promoter=rpoD;box35pos=176;box35seq=ccgatc;box10pos=203;box10seq=tattca
YPK_2439	YPK_2439	DNA polymerase III subunit theta PFAM: DNA polymerase II beta subunit~KEGG: ypi:YpsIP31758_2343 DNA polymerase III, theta subunit	2671957	2672187	+	TSS	2671425	2671925	2671701	1.98	rpoE	promoter=rpoE;box35pos=244;box35seq=aaatca;box10pos=265;box10seq=tctaa
YPK_2439	YPK_2439	DNA polymerase III subunit theta PFAM: DNA polymerase II beta subunit~KEGG: ypi:YpsIP31758_2343 DNA polymerase III, theta subunit	2671957	2672187	+	TSS	2671425	2671925	2671722	1.96	rpoS	promoter=rpoS;box35pos=259;box35seq=ttgata;box10pos=284;box10seq=taaaat
YPK_2439	YPK_2439	DNA polymerase III subunit theta PFAM: DNA polymerase II beta subunit~KEGG: ypi:YpsIP31758_2343 DNA polymerase III, theta subunit	2671957	2672187	+	TSS	2671425	2671925	2671748	1.97	rpoD	promoter=rpoD;box35pos=289;box35seq=ttaaat;box10pos=312;box10seq=catcat
YPK_2442	YPK_2442	oligOPeroneptidase B PFAM: peptidase S9 prolyl oligOPeroneptidase active site domain protein; peptidase S9A prolyl oligOPeroneptidase domain protein beta-prOPeroneller~KEGG: ypi:YpsIP31758_2346 protease II	2673919	2675970	-	TSS	2676024	2676524	2676809	1.92	rpoE	promoter=rpoE;box35pos=183;box35seq=aaacat;box10pos=205;box10seq=gcaat
YPK_2442	YPK_2442	oligOPeroneptidase B PFAM: peptidase S9 prolyl oligOPeroneptidase active site domain protein; peptidase S9A prolyl oligOPeroneptidase domain protein beta-prOPeroneller~KEGG: ypi:YpsIP31758_2346 protease II	2673919	2675970	-	TSS	2676024	2676524	2676582	1.91	rpoD	promoter=rpoD;box35pos=407;box35seq=ctgcca;box10pos=430;box10seq=taatat
YPK_2452	YPK_2452	4-hydroxyphenylacetate 3-monooxygenase, reductase subunit TIGRFAM: 4-hydroxyphenylacetate 3-monooxygenase, reductase subunit~PFAM: flavin reductase domain protein FMN-binding~KEGG: ypi:YpsIP31758_2356 4-hydroxyphenylacetate 3-monooxygenase, reductase component	2685327	2685824	-	OPeron	2691762	2692262	2692474	1.91	rpoS	promoter=rpoS;box35pos=249;box35seq=ctggcg;box10pos=275;box10seq=tattca
YPK_2452	YPK_2452	4-hydroxyphenylacetate 3-monooxygenase, reductase subunit TIGRFAM: 4-hydroxyphenylacetate 3-monooxygenase, reductase subunit~PFAM: flavin reductase domain protein FMN-binding~KEGG: ypi:YpsIP31758_2356 4-hydroxyphenylacetate 3-monooxygenase, reductase component	2685327	2685824	-	OPeron	2691762	2692262	2692551	1.9	rpoD	promoter=rpoD;box35pos=172;box35seq=ttcact;box10pos=199;box10seq=tacttt
YPK_2462	YPK_2462	MarR family transcriptional regulator TIGRFAM: homOPeronrotocatechuate degradation OPeroneron regulator, HpaR~PFAM: regulatory protein MarR~KEGG: ypi:YpsIP31758_2366 homOPeronrotocatechuate degradation OPeroneron regulator, HpaR	2695107	2695574	+	TSS	2694552	2695052	2694841	1.98	rpoE	promoter=rpoE;box35pos=255;box35seq=caacag;box10pos=278;box10seq=tctat
YPK_2462	YPK_2462	MarR family transcriptional regulator TIGRFAM: homOPeronrotocatechuate degradation OPeroneron regulator, HpaR~PFAM: regulatory protein MarR~KEGG: ypi:YpsIP31758_2366 homOPeronrotocatechuate degradation OPeroneron regulator, HpaR	2695107	2695574	+	TSS	2694552	2695052	2694945	1.96	rpoS	promoter=rpoS;box35pos=355;box35seq=tttatt;box10pos=379;box10seq=taaaat
YPK_2462	YPK_2462	MarR family transcriptional regulator TIGRFAM: homOPeronrotocatechuate degradation OPeroneron regulator, HpaR~PFAM: regulatory protein MarR~KEGG: ypi:YpsIP31758_2366 homOPeronrotocatechuate degradation OPeroneron regulator, HpaR	2695107	2695574	+	TSS	2694552	2695052	2694880	1.98	rpoD	promoter=rpoD;box35pos=294;box35seq=gtgatc;box10pos=316;box10seq=tacaat
YPK_2464	YPK_2464	PTS system mannose/fructose/sorbose family transporter subunit IIB KEGG: ypa:YPA_1130 PTS system, mannose-specific IIAB component~TIGRFAM: PTS system, mannose/fructose/sorbose family, IIB subunit; PTS system, mannose/fructose/sorbose family, IIA subunit~PFAM: PTS system fructose subfamily IIA component; PTS system sorbos	2697931	2698905	+	TSS	2697252	2697752	2697549	1.97	rpoE	promoter=rpoE;box35pos=262;box35seq=tcatta;box10pos=286;box10seq=tctaa
YPK_2464	YPK_2464	PTS system mannose/fructose/sorbose family transporter subunit IIB KEGG: ypa:YPA_1130 PTS system, mannose-specific IIAB component~TIGRFAM: PTS system, mannose/fructose/sorbose family, IIB subunit; PTS system, mannose/fructose/sorbose family, IIA subunit~PFAM: PTS system fructose subfamily IIA component; PTS system sorbos	2697931	2698905	+	TSS	2697252	2697752	2697570	1.92	rpoS	promoter=rpoS;box35pos=284;box35seq=catcta;box10pos=305;box10seq=aacgat
YPK_2464	YPK_2464	PTS system mannose/fructose/sorbose family transporter subunit IIB KEGG: ypa:YPA_1130 PTS system, mannose-specific IIAB component~TIGRFAM: PTS system, mannose/fructose/sorbose family, IIB subunit; PTS system, mannose/fructose/sorbose family, IIA subunit~PFAM: PTS system fructose subfamily IIA component; PTS system sorbos	2697931	2698905	+	TSS	2697252	2697752	2697496	1.96	rpoD	promoter=rpoD;box35pos=207;box35seq=tgaaaa;box10pos=232;box10seq=gatttt
YPK_2466	YPK_2466	PTS system mannose-specific transporter subunit IID hosphoenolpyruvate-dependent sugar phosphotransferase system catalyzes the phosphorylation of incoming sugar substrates concomitant with their translocation across the cell membrane; IID with IIC forms the translocation channel	2699810	2700688	+	OPeron	2697431	2697931	2697743	1.98	rpoE	promoter=rpoE;box35pos=278;box35seq=gcaatg;box10pos=301;box10seq=tcact
YPK_2466	YPK_2466	PTS system mannose-specific transporter subunit IID hosphoenolpyruvate-dependent sugar phosphotransferase system catalyzes the phosphorylation of incoming sugar substrates concomitant with their translocation across the cell membrane; IID with IIC forms the translocation channel	2699810	2700688	+	OPeron	2697431	2697931	2697753	1.95	rpoS	promoter=rpoS;box35pos=283;box35seq=gtcaca;box10pos=309;box10seq=taaaat
YPK_2466	YPK_2466	PTS system mannose-specific transporter subunit IID hosphoenolpyruvate-dependent sugar phosphotransferase system catalyzes the phosphorylation of incoming sugar substrates concomitant with their translocation across the cell membrane; IID with IIC forms the translocation channel	2699810	2700688	+	OPeron	2697431	2697931	2697752	1.96	rpoD	promoter=rpoD;box35pos=283;box35seq=gtcaca;box10pos=309;box10seq=taaaat
YPK_2467	YPK_2467	hypothetical protein PFAM: protein of unknown function DUF986~KEGG: ypi:YpsIP31758_2371 hypothetical protein	2700888	2701349	+	SGene	2700388	2700888	2700758	1.93	rpoD	promoter=rpoD;box35pos=335;box35seq=ttgctc;box10pos=358;box10seq=tagaca
YPK_2468	YPK_2468	hypothetical protein PFAM: protein of unknown function DUF204~KEGG: ypa:YPA_1126 hypothetical protein	2701775	2702344	+	TSS	2701074	2701574	2701369	1.98	rpoE	promoter=rpoE;box35pos=262;box35seq=gaaaat;box10pos=284;box10seq=tcttt
YPK_2468	YPK_2468	hypothetical protein PFAM: protein of unknown function DUF204~KEGG: ypa:YPA_1126 hypothetical protein	2701775	2702344	+	TSS	2701074	2701574	2701400	1.96	rpoS	promoter=rpoS;box35pos=286;box35seq=tttctg;box10pos=312;box10seq=tacaac
YPK_2468	YPK_2468	hypothetical protein PFAM: protein of unknown function DUF204~KEGG: ypa:YPA_1126 hypothetical protein	2701775	2702344	+	TSS	2701074	2701574	2701507	1.97	rpoD	promoter=rpoD;box35pos=399;box35seq=ttttaa;box10pos=420;box10seq=gaaaat
YPK_2474	YPK_2474	cold shock-like protein CspC PFAM: Cold-shock protein DNA-binding~SMART: Cold shock protein~KEGG: spe:Spro_2822 cold-shock DNA-binding domain protein	2710035	2710244	-	OPeron	2710403	2710903	2711033	1.98	rpoE	promoter=rpoE;box35pos=337;box35seq=taacac;box10pos=359;box10seq=tctca
YPK_2474	YPK_2474	cold shock-like protein CspC PFAM: Cold-shock protein DNA-binding~SMART: Cold shock protein~KEGG: spe:Spro_2822 cold-shock DNA-binding domain protein	2710035	2710244	-	OPeron	2710403	2710903	2711038	1.96	rpoS	promoter=rpoS;box35pos=330;box35seq=ttgaat;box10pos=352;box10seq=tacagt
YPK_2474	YPK_2474	cold shock-like protein CspC PFAM: Cold-shock protein DNA-binding~SMART: Cold shock protein~KEGG: spe:Spro_2822 cold-shock DNA-binding domain protein	2710035	2710244	-	OPeron	2710403	2710903	2711059	1.97	rpoD	promoter=rpoD;box35pos=305;box35seq=tttatt;box10pos=332;box10seq=gaatat
YPK_2478	YPK_2478	hypothetical protein KEGG: ypi:YpsIP31758_2382 hypothetical protein	2713919	2714164	-	SGene	2714164	2714664	2714718	1.93	rpoE	promoter=rpoE;box35pos=412;box35seq=gaaccc;box10pos=435;box10seq=tctga
YPK_2478	YPK_2478	hypothetical protein KEGG: ypi:YpsIP31758_2382 hypothetical protein	2713919	2714164	-	SGene	2714164	2714664	2714939	1.93	rpoD	promoter=rpoD;box35pos=192;box35seq=ttggta;box10pos=214;box10seq=gattat
YPK_2480	YPK_2480	hypothetical protein KEGG: ypi:YpsIP31758_2384 hypothetical protein	2714835	2715110	-	TSS	2715139	2715639	2715746	1.96	rpoE	promoter=rpoE;box35pos=360;box35seq=taacca;box10pos=382;box10seq=actaa
YPK_2480	YPK_2480	hypothetical protein KEGG: ypi:YpsIP31758_2384 hypothetical protein	2714835	2715110	-	TSS	2715139	2715639	2715708	1.95	rpoS	promoter=rpoS;box35pos=396;box35seq=gtggaa;box10pos=418;box10seq=catgtt
YPK_2480	YPK_2480	hypothetical protein KEGG: ypi:YpsIP31758_2384 hypothetical protein	2714835	2715110	-	TSS	2715139	2715639	2715816	1.96	rpoD	promoter=rpoD;box35pos=286;box35seq=tcacaa;box10pos=311;box10seq=tatgtt
YPK_2486	YPK_2486	hypothetical protein KEGG: ypm:YP_1476 hypothetical protein	2717470	2717634	-	TSS	2717732	2718232	2718410	1.98	rpoE	promoter=rpoE;box35pos=288;box35seq=gaacca;box10pos=311;box10seq=tcaaa
YPK_2486	YPK_2486	hypothetical protein KEGG: ypm:YP_1476 hypothetical protein	2717470	2717634	-	TSS	2717732	2718232	2718407	1.96	rpoS	promoter=rpoS;box35pos=285;box35seq=taagaa;box10pos=312;box10seq=caaact
YPK_2486	YPK_2486	hypothetical protein KEGG: ypm:YP_1476 hypothetical protein	2717470	2717634	-	TSS	2717732	2718232	2718418	1.96	rpoD	promoter=rpoD;box35pos=280;box35seq=gctatt;box10pos=302;box10seq=tataat
YPK_2494	YPK_2494	hypothetical protein KEGG: ypi:YpsIP31758_2396 hypothetical protein	2727799	2727963	+	OPeron	2725156	2725656	2725581	1.91	rpoD	promoter=rpoD;box35pos=391;box35seq=gttacc;box10pos=413;box10seq=cacaat
YPK_2529	hisH	imidazole glycerol phosphate synthase subunit HisH with HisF IGPS catalyzes the conversion of phosphoribulosyl-formimino-5-aminoimidazole-4-carboxamide ribonucleotide phosphate and glutamine to imidazole-glycerol phosphate, 5-aminoimidazol-4-carboxamide ribonucleotide, and glutamate in histidine biosynthe	2771211	2771801	+	OPeron	2766262	2766762	2766681	1.93	rpoE	promoter=rpoE;box35pos=389;box35seq=gctcaa;box10pos=408;box10seq=tcaat
YPK_2529	hisH	imidazole glycerol phosphate synthase subunit HisH with HisF IGPS catalyzes the conversion of phosphoribulosyl-formimino-5-aminoimidazole-4-carboxamide ribonucleotide phosphate and glutamine to imidazole-glycerol phosphate, 5-aminoimidazol-4-carboxamide ribonucleotide, and glutamate in histidine biosynthe	2771211	2771801	+	OPeron	2766262	2766762	2766470	1.9	rpoD	promoter=rpoD;box35pos=173;box35seq=ttcaat;box10pos=196;box10seq=catcat
YPK_2530	YPK_2530	1-(5-phosphoribosyl)-5-[(5-phosphoribosylamino)methylideneamino] imidazole-4-carboxamide isomerase catalyzes the formation of 5-(5-phospho-1-deoxyribulos-1-ylamino)methylideneamino-l-(5-phosphoribosyl)imidazole-4-carboxamide from 1-(5-phosphoribosyl)-5-[(5-phosphoribosylamino)methylideneamino] imidazole-4-carboxamide	2771807	2772544	+	OPeron	2766262	2766762	2766681	1.93	rpoE	promoter=rpoE;box35pos=389;box35seq=gctcaa;box10pos=408;box10seq=tcaat
YPK_2530	YPK_2530	1-(5-phosphoribosyl)-5-[(5-phosphoribosylamino)methylideneamino] imidazole-4-carboxamide isomerase catalyzes the formation of 5-(5-phospho-1-deoxyribulos-1-ylamino)methylideneamino-l-(5-phosphoribosyl)imidazole-4-carboxamide from 1-(5-phosphoribosyl)-5-[(5-phosphoribosylamino)methylideneamino] imidazole-4-carboxamide	2771807	2772544	+	OPeron	2766262	2766762	2766470	1.9	rpoD	promoter=rpoD;box35pos=173;box35seq=ttcaat;box10pos=196;box10seq=catcat
YPK_2535	YPK_2535	6-phosphogluconate dehydrogenase catalyzes the formation of D-ribulose 5-phosphate from 6-phospho-D-gluconate	2774820	2776229	-	TSS	2776294	2776794	2776974	1.98	rpoE	promoter=rpoE;box35pos=284;box35seq=acacct;box10pos=309;box10seq=tcgta
YPK_2535	YPK_2535	6-phosphogluconate dehydrogenase catalyzes the formation of D-ribulose 5-phosphate from 6-phospho-D-gluconate	2774820	2776229	-	TSS	2776294	2776794	2776930	1.96	rpoS	promoter=rpoS;box35pos=326;box35seq=gcgacg;box10pos=351;box10seq=taaatt
YPK_2535	YPK_2535	6-phosphogluconate dehydrogenase catalyzes the formation of D-ribulose 5-phosphate from 6-phospho-D-gluconate	2774820	2776229	-	TSS	2776294	2776794	2777001	1.97	rpoD	promoter=rpoD;box35pos=253;box35seq=tgccaa;box10pos=281;box10seq=tataca
YPK_2539	YPK_2539	TonB-dependent siderOPeronhore receptor TIGRFAM: TonB-dependent siderOPeronhore receptor~PFAM: TonB-dependent receptor; TonB-dependent receptor plug~KEGG: yps:YPTB1549 putative OMR family iron-siderOPeronhore receptor	2781473	2783734	+	OPeron	2780973	2781473	2781400	1.95	rpoE	promoter=rpoE;box35pos=395;box35seq=gaccat;box10pos=416;box10seq=tcaat
YPK_2539	YPK_2539	TonB-dependent siderOPeronhore receptor TIGRFAM: TonB-dependent siderOPeronhore receptor~PFAM: TonB-dependent receptor; TonB-dependent receptor plug~KEGG: yps:YPTB1549 putative OMR family iron-siderOPeronhore receptor	2781473	2783734	+	OPeron	2780973	2781473	2781371	1.95	rpoS	promoter=rpoS;box35pos=360;box35seq=ttggct;box10pos=385;box10seq=caagct
YPK_2539	YPK_2539	TonB-dependent siderOPeronhore receptor TIGRFAM: TonB-dependent siderOPeronhore receptor~PFAM: TonB-dependent receptor; TonB-dependent receptor plug~KEGG: yps:YPTB1549 putative OMR family iron-siderOPeronhore receptor	2781473	2783734	+	OPeron	2780973	2781473	2781405	1.96	rpoD	promoter=rpoD;box35pos=393;box35seq=tagacc;box10pos=420;box10seq=tatatt
YPK_2552	YPK_2552	uridine kinase functions in pyrimidine salvage; pyrimidine ribonucleoside kinase; phosphorylates nucleosides or dinucleosides to make UMP or CMP using ATP or GTP as the donor	2799070	2799711	-	TSS	2799769	2800269	2800474	1.93	rpoD	promoter=rpoD;box35pos=256;box35seq=tagccg;box10pos=283;box10seq=taaatt
YPK_2564	mglC	beta-methylgalactoside transporter inner membrane protein ABC transporter; functions in galactose transport; part of MglA2C2B transporter complex	2814784	2815794	-	OPeron	2817335	2817835	2818054	1.98	rpoE	promoter=rpoE;box35pos=251;box35seq=gattat;box10pos=271;box10seq=acgta
YPK_2564	mglC	beta-methylgalactoside transporter inner membrane protein ABC transporter; functions in galactose transport; part of MglA2C2B transporter complex	2814784	2815794	-	OPeron	2817335	2817835	2818099	1.96	rpoS	promoter=rpoS;box35pos=201;box35seq=ttgcct;box10pos=223;box10seq=cacagt
YPK_2564	mglC	beta-methylgalactoside transporter inner membrane protein ABC transporter; functions in galactose transport; part of MglA2C2B transporter complex	2814784	2815794	-	OPeron	2817335	2817835	2818062	1.96	rpoD	promoter=rpoD;box35pos=238;box35seq=gtgaat;box10pos=260;box10seq=tatcaa
YPK_2575	YPK_2575	RND family efflux transporter MFP subunit TIGRFAM: efflux transporter, RND family, MFP subunit~KEGG: yps:YPTB1514 putative exported protein	2828719	2829981	+	OPeron	2825857	2826357	2826069	1.98	rpoE	promoter=rpoE;box35pos=179;box35seq=tcactc;box10pos=201;box10seq=tcaat
YPK_2575	YPK_2575	RND family efflux transporter MFP subunit TIGRFAM: efflux transporter, RND family, MFP subunit~KEGG: yps:YPTB1514 putative exported protein	2828719	2829981	+	OPeron	2825857	2826357	2826137	1.95	rpoS	promoter=rpoS;box35pos=242;box35seq=tagaaa;box10pos=267;box10seq=taaatt
YPK_2575	YPK_2575	RND family efflux transporter MFP subunit TIGRFAM: efflux transporter, RND family, MFP subunit~KEGG: yps:YPTB1514 putative exported protein	2828719	2829981	+	OPeron	2825857	2826357	2826220	1.96	rpoD	promoter=rpoD;box35pos=330;box35seq=tagcaa;box10pos=351;box10seq=taaaaa
YPK_2580	YPK_2580	hypothetical protein KEGG: ypi:YpsIP31758_2482 hypothetical protein	2834624	2835271	-	SGene	2835271	2835771	2836049	1.97	rpoE	promoter=rpoE;box35pos=186;box35seq=gcatca;box10pos=211;box10seq=tcaaa
YPK_2580	YPK_2580	hypothetical protein KEGG: ypi:YpsIP31758_2482 hypothetical protein	2834624	2835271	-	SGene	2835271	2835771	2835992	1.95	rpoS	promoter=rpoS;box35pos=243;box35seq=cagata;box10pos=266;box10seq=taaagt
YPK_2580	YPK_2580	hypothetical protein KEGG: ypi:YpsIP31758_2482 hypothetical protein	2834624	2835271	-	SGene	2835271	2835771	2835824	1.97	rpoD	promoter=rpoD;box35pos=411;box35seq=gtggtt;box10pos=435;box10seq=taaaat
YPK_2611	YPK_2611	beta-hydroxyacyl-(acyl-carrier-protein) dehydratase FabA/FabZ PFAM: Beta-hydroxyacyl-(acyl-carrier-protein) dehydratase FabA/FabZ~KEGG: ypi:YpsIP31758_2521 thioester dehydratase family protein	2864728	2865252	-	OPeron	2865252	2865752	2866033	1.98	rpoE	promoter=rpoE;box35pos=186;box35seq=aaatat;box10pos=208;box10seq=tccat
YPK_2611	YPK_2611	beta-hydroxyacyl-(acyl-carrier-protein) dehydratase FabA/FabZ PFAM: Beta-hydroxyacyl-(acyl-carrier-protein) dehydratase FabA/FabZ~KEGG: ypi:YpsIP31758_2521 thioester dehydratase family protein	2864728	2865252	-	OPeron	2865252	2865752	2866017	1.96	rpoS	promoter=rpoS;box35pos=196;box35seq=tttatt;box10pos=224;box10seq=tagatt
YPK_2611	YPK_2611	beta-hydroxyacyl-(acyl-carrier-protein) dehydratase FabA/FabZ PFAM: Beta-hydroxyacyl-(acyl-carrier-protein) dehydratase FabA/FabZ~KEGG: ypi:YpsIP31758_2521 thioester dehydratase family protein	2864728	2865252	-	OPeron	2865252	2865752	2866024	1.97	rpoD	promoter=rpoD;box35pos=194;box35seq=ttttta;box10pos=216;box10seq=caatct
YPK_2615	YPK_2615	cytotoxic necrotizing factor PFAM: Cytotoxic necrotizing factor~KEGG: eci:UTI89_C4921 cytotoxic necrotizing factor 1	2869924	2872968	-	SGene	2872968	2873468	2873699	1.98	rpoE	promoter=rpoE;box35pos=236;box35seq=acatta;box10pos=258;box10seq=tcaca
YPK_2615	YPK_2615	cytotoxic necrotizing factor PFAM: Cytotoxic necrotizing factor~KEGG: eci:UTI89_C4921 cytotoxic necrotizing factor 1	2869924	2872968	-	SGene	2872968	2873468	2873763	1.96	rpoS	promoter=rpoS;box35pos=170;box35seq=tgcaca;box10pos=194;box10seq=taaact
YPK_2615	YPK_2615	cytotoxic necrotizing factor PFAM: Cytotoxic necrotizing factor~KEGG: eci:UTI89_C4921 cytotoxic necrotizing factor 1	2869924	2872968	-	SGene	2872968	2873468	2873727	1.97	rpoD	promoter=rpoD;box35pos=206;box35seq=tttaat;box10pos=229;box10seq=catttt
YPK_2634	YPK_2634	3-hydroxydecanoyl-ACP dehydratase catalyzes the dehydration of (3R)-3-hydroxydecanoyl-ACP to 2,3-decenoyl-ACP or 3,4-decenoyl-ACP	2890003	2890629	+	OPeron	2887920	2888420	2888256	1.94	rpoS	promoter=rpoS;box35pos=301;box35seq=tctacg;box10pos=323;box10seq=tattct
YPK_2634	YPK_2634	3-hydroxydecanoyl-ACP dehydratase catalyzes the dehydration of (3R)-3-hydroxydecanoyl-ACP to 2,3-decenoyl-ACP or 3,4-decenoyl-ACP	2890003	2890629	+	OPeron	2887920	2888420	2888262	1.92	rpoD	promoter=rpoD;box35pos=307;box35seq=tatatg;box10pos=331;box10seq=tataat
YPK_2639	YPK_2639	PqiA family integral membrane protein TIGRFAM: integral membrane protein, PqiA family~PFAM: Paraquat-inducible protein A~KEGG: yps:YPTB1444 putative paraquat-inducible protein A	2895316	2896602	-	OPeron	2896602	2897102	2897305	1.91	rpoD	promoter=rpoD;box35pos=260;box35seq=ctgact;box10pos=285;box10seq=tatcat
YPK_2643	YPK_2643	hypothetical protein PFAM: protein of unknown function DUF1379~KEGG: ypi:YpsIP31758_2554 hypothetical protein	2902008	2902559	-	SGene	2902559	2903059	2903338	1.98	rpoE	promoter=rpoE;box35pos=187;box35seq=gatatg;box10pos=210;box10seq=tcaaa
YPK_2643	YPK_2643	hypothetical protein PFAM: protein of unknown function DUF1379~KEGG: ypi:YpsIP31758_2554 hypothetical protein	2902008	2902559	-	SGene	2902559	2903059	2903339	1.95	rpoS	promoter=rpoS;box35pos=185;box35seq=tagata;box10pos=207;box10seq=taatca
YPK_2643	YPK_2643	hypothetical protein PFAM: protein of unknown function DUF1379~KEGG: ypi:YpsIP31758_2554 hypothetical protein	2902008	2902559	-	SGene	2902559	2903059	2903352	1.96	rpoD	promoter=rpoD;box35pos=175;box35seq=gataaa;box10pos=196;box10seq=gacgat
YPK_2667	ihfB	integration host factor subunit beta This protein is one of the two subunits of integration host factor, a specific DNA-binding protein that functions in genetic recombination as well as in transcriptional and translational control	2936156	2936440	-	OPeron	2938174	2938674	2938725	1.93	rpoE	promoter=rpoE;box35pos=416;box35seq=gaactg;box10pos=438;box10seq=tcaca
YPK_2667	ihfB	integration host factor subunit beta This protein is one of the two subunits of integration host factor, a specific DNA-binding protein that functions in genetic recombination as well as in transcriptional and translational control	2936156	2936440	-	OPeron	2938174	2938674	2938965	1.95	rpoS	promoter=rpoS;box35pos=169;box35seq=ttgtcg;box10pos=196;box10seq=taaaat
YPK_2667	ihfB	integration host factor subunit beta This protein is one of the two subunits of integration host factor, a specific DNA-binding protein that functions in genetic recombination as well as in transcriptional and translational control	2936156	2936440	-	OPeron	2938174	2938674	2938728	1.91	rpoD	promoter=rpoD;box35pos=408;box35seq=gttctt;box10pos=433;box10seq=tatttt
YPK_2668	rpsA	30S ribosomal protein S1 in Escherichia coli this protein is involved in binding to the leader sequence of mRNAs and is itself bound to the 30S subunit; autoregulates expression via a C-terminal domain; in most gram negative organisms this protein is composed of 6 repeats of the	2936501	2938174	-	TSS	2938332	2938832	2939041	1.93	rpoE	promoter=rpoE;box35pos=258;box35seq=gaactg;box10pos=280;box10seq=tcaca
YPK_2668	rpsA	30S ribosomal protein S1 in Escherichia coli this protein is involved in binding to the leader sequence of mRNAs and is itself bound to the 30S subunit; autoregulates expression via a C-terminal domain; in most gram negative organisms this protein is composed of 6 repeats of the	2936501	2938174	-	TSS	2938332	2938832	2939044	1.91	rpoD	promoter=rpoD;box35pos=250;box35seq=gttctt;box10pos=275;box10seq=tatttt
YPK_2677	YPK_2677	formate acetyltransferase KEGG: ypi:YpsIP31758_2589 formate acetyltransferase~TIGRFAM: formate acetyltransferase~PFAM: formate C-acetyltransferase glycine radical; pyruvate formate-lyase PFL	2950107	2952389	+	OPeron	2948694	2949194	2949136	1.98	rpoE	promoter=rpoE;box35pos=408;box35seq=aaactc;box10pos=431;box10seq=tcaat
YPK_2677	YPK_2677	formate acetyltransferase KEGG: ypi:YpsIP31758_2589 formate acetyltransferase~TIGRFAM: formate acetyltransferase~PFAM: formate C-acetyltransferase glycine radical; pyruvate formate-lyase PFL	2950107	2952389	+	OPeron	2948694	2949194	2949109	1.96	rpoS	promoter=rpoS;box35pos=380;box35seq=tataaa;box10pos=402;box10seq=taaact
YPK_2677	YPK_2677	formate acetyltransferase KEGG: ypi:YpsIP31758_2589 formate acetyltransferase~TIGRFAM: formate acetyltransferase~PFAM: formate C-acetyltransferase glycine radical; pyruvate formate-lyase PFL	2950107	2952389	+	OPeron	2948694	2949194	2949108	1.97	rpoD	promoter=rpoD;box35pos=380;box35seq=tataaa;box10pos=402;box10seq=taaact
YPK_2683	YPK_2683	recombination factor protein RarA PFAM: AAA ATPase central domain protein~SMART: AAA ATPase~KEGG: ypa:YPA_0668 putative ATPase protein	2957977	2959311	-	OPeron	2959939	2960439	2960735	1.97	rpoE	promoter=rpoE;box35pos=170;box35seq=gcacta;box10pos=193;box10seq=actca
YPK_2683	YPK_2683	recombination factor protein RarA PFAM: AAA ATPase central domain protein~SMART: AAA ATPase~KEGG: ypa:YPA_0668 putative ATPase protein	2957977	2959311	-	OPeron	2959939	2960439	2960736	1.93	rpoS	promoter=rpoS;box35pos=164;box35seq=tcgcca;box10pos=192;box10seq=tactca
YPK_2683	YPK_2683	recombination factor protein RarA PFAM: AAA ATPase central domain protein~SMART: AAA ATPase~KEGG: ypa:YPA_0668 putative ATPase protein	2957977	2959311	-	OPeron	2959939	2960439	2960701	1.97	rpoD	promoter=rpoD;box35pos=202;box35seq=gtggtg;box10pos=226;box10seq=taccat
YPK_2692	clpA	ATP-dependent Clp protease ATP-binding subunit ATPase and specificity subunit of the ClpA-ClpP ATP dependent serine protease; directs protease to specific substrates	2972071	2974347	-	TSS	2974528	2975028	2975094	1.91	rpoS	promoter=rpoS;box35pos=399;box35seq=ttgacg;box10pos=421;box10seq=tagagt
YPK_2692	clpA	ATP-dependent Clp protease ATP-binding subunit ATPase and specificity subunit of the ClpA-ClpP ATP dependent serine protease; directs protease to specific substrates	2972071	2974347	-	TSS	2974528	2975028	2975094	1.92	rpoD	promoter=rpoD;box35pos=399;box35seq=ttgacg;box10pos=421;box10seq=tagagt
YPK_2700	YPK_2700	hypothetical protein PFAM: protein of unknown function DUF340 membrane~KEGG: ypa:YPA_0650 hypothetical protein	2982000	2982896	+	TSS	2981322	2981822	2981569	1.94	rpoE	promoter=rpoE;box35pos=214;box35seq=aaactg;box10pos=236;box10seq=tctca
YPK_2700	YPK_2700	hypothetical protein PFAM: protein of unknown function DUF340 membrane~KEGG: ypa:YPA_0650 hypothetical protein	2982000	2982896	+	TSS	2981322	2981822	2981703	1.96	rpoD	promoter=rpoD;box35pos=346;box35seq=ctcatt;box10pos=369;box10seq=taacat
YPK_2734	YPK_2734	hypothetical protein TIGRFAM: YidE/YbjL duplication~PFAM: TrkA-C domain protein; YidE/YbjL duplication domain protein~KEGG: ypa:YPA_0617 TrkA, potassium channel-family protein	3014184	3015872	+	SGene	3013684	3014184	3013949	1.97	rpoE	promoter=rpoE;box35pos=233;box35seq=tcatct;box10pos=255;box10seq=tctca
YPK_2734	YPK_2734	hypothetical protein TIGRFAM: YidE/YbjL duplication~PFAM: TrkA-C domain protein; YidE/YbjL duplication domain protein~KEGG: ypa:YPA_0617 TrkA, potassium channel-family protein	3014184	3015872	+	SGene	3013684	3014184	3013963	1.95	rpoS	promoter=rpoS;box35pos=240;box35seq=cttcca;box10pos=266;box10seq=aatact
YPK_2734	YPK_2734	hypothetical protein TIGRFAM: YidE/YbjL duplication~PFAM: TrkA-C domain protein; YidE/YbjL duplication domain protein~KEGG: ypa:YPA_0617 TrkA, potassium channel-family protein	3014184	3015872	+	SGene	3013684	3014184	3014024	1.96	rpoD	promoter=rpoD;box35pos=304;box35seq=cagacc;box10pos=328;box10seq=tatcat
YPK_2744	YPK_2744	2OG-Fe(II) oxygenase PFAM: 2OG-Fe(II) oxygenase~KEGG: ypi:YpsIP31758_2663 oxidoreductase, 2OG-Fe(II) oxygenase family	3026584	3027651	-	OPeron	3027736	3028236	3028501	1.97	rpoE	promoter=rpoE;box35pos=203;box35seq=taacgc;box10pos=224;box10seq=gcgat
YPK_2744	YPK_2744	2OG-Fe(II) oxygenase PFAM: 2OG-Fe(II) oxygenase~KEGG: ypi:YpsIP31758_2663 oxidoreductase, 2OG-Fe(II) oxygenase family	3026584	3027651	-	OPeron	3027736	3028236	3028488	1.95	rpoS	promoter=rpoS;box35pos=211;box35seq=gcgcta;box10pos=235;box10seq=tacaaa
YPK_2744	YPK_2744	2OG-Fe(II) oxygenase PFAM: 2OG-Fe(II) oxygenase~KEGG: ypi:YpsIP31758_2663 oxidoreductase, 2OG-Fe(II) oxygenase family	3026584	3027651	-	OPeron	3027736	3028236	3028452	1.96	rpoD	promoter=rpoD;box35pos=245;box35seq=gatcat;box10pos=272;box10seq=taacct
YPK_2761	YPK_2761	transcriptional regulator CadC PFAM: transcriptional regulator domain protein~KEGG: ypi:YpsIP31758_2680 transcriptional regulator	3045935	3046579	-	TSS	3046642	3047142	3047424	1.96	rpoE	promoter=rpoE;box35pos=188;box35seq=gaatta;box10pos=207;box10seq=tcaga
YPK_2761	YPK_2761	transcriptional regulator CadC PFAM: transcriptional regulator domain protein~KEGG: ypi:YpsIP31758_2680 transcriptional regulator	3045935	3046579	-	TSS	3046642	3047142	3047421	1.94	rpoS	promoter=rpoS;box35pos=186;box35seq=cagaat;box10pos=208;box10seq=cagact
YPK_2794	YPK_2794	type III restriction protein res subunit PFAM: helicase domain protein; type III restriction protein res subunit; DEAD/DEAH box helicase domain protein~SMART: DEAD-like helicases~KEGG: ypi:YpsIP31758_2719 putative helicase	3084740	3086497	+	SGene	3084240	3084740	3084684	1.98	rpoE	promoter=rpoE;box35pos=409;box35seq=aaactt;box10pos=433;box10seq=tcaat
YPK_2794	YPK_2794	type III restriction protein res subunit PFAM: helicase domain protein; type III restriction protein res subunit; DEAD/DEAH box helicase domain protein~SMART: DEAD-like helicases~KEGG: ypi:YpsIP31758_2719 putative helicase	3084740	3086497	+	SGene	3084240	3084740	3084676	1.94	rpoS	promoter=rpoS;box35pos=398;box35seq=cataat;box10pos=423;box10seq=taggct
YPK_2794	YPK_2794	type III restriction protein res subunit PFAM: helicase domain protein; type III restriction protein res subunit; DEAD/DEAH box helicase domain protein~SMART: DEAD-like helicases~KEGG: ypi:YpsIP31758_2719 putative helicase	3084740	3086497	+	SGene	3084240	3084740	3084469	1.96	rpoD	promoter=rpoD;box35pos=195;box35seq=ctaaaa;box10pos=216;box10seq=taaaaa
YPK_2807	YPK_2807	RpiR family transcriptional regulator PFAM: helix-turn-helix protein RpiR; sugar isomerase (SIS)~KEGG: yps:YPTB1289 putative LacI-family regulatory protein	3095683	3096423	-	SGene	3096423	3096923	3097014	1.98	rpoE	promoter=rpoE;box35pos=376;box35seq=taacag;box10pos=398;box10seq=tccct
YPK_2807	YPK_2807	RpiR family transcriptional regulator PFAM: helix-turn-helix protein RpiR; sugar isomerase (SIS)~KEGG: yps:YPTB1289 putative LacI-family regulatory protein	3095683	3096423	-	SGene	3096423	3096923	3096983	1.96	rpoS	promoter=rpoS;box35pos=400;box35seq=cctacg;box10pos=427;box10seq=tatacc
YPK_2807	YPK_2807	RpiR family transcriptional regulator PFAM: helix-turn-helix protein RpiR; sugar isomerase (SIS)~KEGG: yps:YPTB1289 putative LacI-family regulatory protein	3095683	3096423	-	SGene	3096423	3096923	3097144	1.97	rpoD	promoter=rpoD;box35pos=243;box35seq=gggaca;box10pos=268;box10seq=tataat
YPK_2820	YPK_2820	putative bacteriOPeronhage protein KEGG: yps:YPTB1276 putative bacteriOPeronhage protein	3107454	3107648	-	OPeron	3108270	3108770	3109034	1.95	rpoS	promoter=rpoS;box35pos=201;box35seq=ttgacg;box10pos=223;box10seq=taaata
YPK_2820	YPK_2820	putative bacteriOPeronhage protein KEGG: yps:YPTB1276 putative bacteriOPeronhage protein	3107454	3107648	-	OPeron	3108270	3108770	3108857	1.97	rpoD	promoter=rpoD;box35pos=373;box35seq=tatcac;box10pos=401;box10seq=tactgt
YPK_2839	YPK_2839	outer membrane porin protein C allows for ions and hydrOPeronhilic solutes to cross the outer membrane	3124680	3125795	-	TSS	3125863	3126363	3126591	1.97	rpoE	promoter=rpoE;box35pos=238;box35seq=gatata;box10pos=261;box10seq=tcatt
YPK_2839	YPK_2839	outer membrane porin protein C allows for ions and hydrOPeronhilic solutes to cross the outer membrane	3124680	3125795	-	TSS	3125863	3126363	3126585	1.95	rpoS	promoter=rpoS;box35pos=240;box35seq=tatata;box10pos=265;box10seq=tatttt
YPK_2839	YPK_2839	outer membrane porin protein C allows for ions and hydrOPeronhilic solutes to cross the outer membrane	3124680	3125795	-	TSS	3125863	3126363	3126654	1.97	rpoD	promoter=rpoD;box35pos=174;box35seq=ttgtaa;box10pos=198;box10seq=tatgat
YPK_2874	YPK_2874	hypothetical protein PFAM: protein of unknown function DUF1456~KEGG: ypi:YpsIP31758_2795 hypothetical protein	3172819	3173292	-	TSS	3173373	3173873	3174123	1.97	rpoE	promoter=rpoE;box35pos=214;box35seq=aatatc;box10pos=239;box10seq=tcata
YPK_2874	YPK_2874	hypothetical protein PFAM: protein of unknown function DUF1456~KEGG: ypi:YpsIP31758_2795 hypothetical protein	3172819	3173292	-	TSS	3173373	3173873	3174147	1.95	rpoS	promoter=rpoS;box35pos=188;box35seq=cttcac;box10pos=213;box10seq=taatat
YPK_2874	YPK_2874	hypothetical protein PFAM: protein of unknown function DUF1456~KEGG: ypi:YpsIP31758_2795 hypothetical protein	3172819	3173292	-	TSS	3173373	3173873	3174148	1.96	rpoD	promoter=rpoD;box35pos=189;box35seq=ttcacc;box10pos=213;box10seq=taatat
YPK_2905	YPK_2905	LysR family transcriptional regulator PFAM: regulatory protein LysR; LysR substrate-binding~KEGG: ypa:YPA_1087 putative transcriptional regulator, LysR family	3199594	3200505	+	SGene	3199094	3199594	3199354	1.93	rpoE	promoter=rpoE;box35pos=230;box35seq=gaaatt;box10pos=249;box10seq=tcaat
YPK_2905	YPK_2905	LysR family transcriptional regulator PFAM: regulatory protein LysR; LysR substrate-binding~KEGG: ypa:YPA_1087 putative transcriptional regulator, LysR family	3199594	3200505	+	SGene	3199094	3199594	3199402	1.94	rpoS	promoter=rpoS;box35pos=267;box35seq=tatcca;box10pos=295;box10seq=cactct
YPK_2905	YPK_2905	LysR family transcriptional regulator PFAM: regulatory protein LysR; LysR substrate-binding~KEGG: ypa:YPA_1087 putative transcriptional regulator, LysR family	3199594	3200505	+	SGene	3199094	3199594	3199297	1.96	rpoD	promoter=rpoD;box35pos=170;box35seq=tgaaag;box10pos=191;box10seq=tattca
YPK_2907	YPK_2907	two component, sigma54 specific, Fis family transcriptional regulator PFAM: response regulator receiver; sigma-54 factor interaction domain-containing protein; helix-turn-helix Fis-type; ATPase associated with various cellular activities AAA_5~SMART: AAA ATPase~KEGG: yps:YPTB1205 transcriptional regulatory protein hydG	3201963	3203327	-	OPeron	3205128	3205628	3205899	1.98	rpoE	promoter=rpoE;box35pos=194;box35seq=gatatt;box10pos=215;box10seq=tcaca
YPK_2907	YPK_2907	two component, sigma54 specific, Fis family transcriptional regulator PFAM: response regulator receiver; sigma-54 factor interaction domain-containing protein; helix-turn-helix Fis-type; ATPase associated with various cellular activities AAA_5~SMART: AAA ATPase~KEGG: yps:YPTB1205 transcriptional regulatory protein hydG	3201963	3203327	-	OPeron	3205128	3205628	3205826	1.95	rpoS	promoter=rpoS;box35pos=264;box35seq=tagcat;box10pos=289;box10seq=taacgt
YPK_2907	YPK_2907	two component, sigma54 specific, Fis family transcriptional regulator PFAM: response regulator receiver; sigma-54 factor interaction domain-containing protein; helix-turn-helix Fis-type; ATPase associated with various cellular activities AAA_5~SMART: AAA ATPase~KEGG: yps:YPTB1205 transcriptional regulatory protein hydG	3201963	3203327	-	OPeron	3205128	3205628	3205891	1.96	rpoD	promoter=rpoD;box35pos=198;box35seq=ttcctt;box10pos=225;box10seq=taaaaa
YPK_2915	YPK_2915	transcriptional regulator BetI HTH-type; bet1; Repressor involved in choline regulation of the bet genes	3213130	3213672	+	SGene	3212630	3213130	3212988	1.98	rpoE	promoter=rpoE;box35pos=325;box35seq=tcattt;box10pos=347;box10seq=tcaaa
YPK_2915	YPK_2915	transcriptional regulator BetI HTH-type; bet1; Repressor involved in choline regulation of the bet genes	3213130	3213672	+	SGene	3212630	3213130	3212958	1.95	rpoS	promoter=rpoS;box35pos=287;box35seq=ttcaca;box10pos=315;box10seq=taaaat
YPK_2915	YPK_2915	transcriptional regulator BetI HTH-type; bet1; Repressor involved in choline regulation of the bet genes	3213130	3213672	+	SGene	3212630	3213130	3212943	1.97	rpoD	promoter=rpoD;box35pos=274;box35seq=gttaca;box10pos=301;box10seq=taactt
YPK_2918	YPK_2918	hypothetical protein PFAM: protein of unknown function UPF0005~KEGG: ypi:YpsIP31758_2832 hypothetical protein	3217139	3217849	-	TSS	3217906	3218406	3218472	1.95	rpoE	promoter=rpoE;box35pos=400;box35seq=acactg;box10pos=423;box10seq=acgga
YPK_2918	YPK_2918	hypothetical protein PFAM: protein of unknown function UPF0005~KEGG: ypi:YpsIP31758_2832 hypothetical protein	3217139	3217849	-	TSS	3217906	3218406	3218477	1.91	rpoS	promoter=rpoS;box35pos=389;box35seq=ttagcg;box10pos=416;box10seq=tatgat
YPK_2919	moaE	molybdOPeronterin guanine dinucleotide biosynthesis protein MoaE catalyzes the conversion of molybdOPeronterin precursor Z into molybdOPeronterin	3217992	3218447	-	OPeron	3219168	3219668	3219781	1.92	rpoS	promoter=rpoS;box35pos=348;box35seq=ccgcca;box10pos=374;box10seq=tatacc
YPK_2919	moaE	molybdOPeronterin guanine dinucleotide biosynthesis protein MoaE catalyzes the conversion of molybdOPeronterin precursor Z into molybdOPeronterin	3217992	3218447	-	OPeron	3219168	3219668	3219917	1.92	rpoD	promoter=rpoD;box35pos=217;box35seq=ttgctg;box10pos=240;box10seq=taactt
YPK_2924	YPK_2924	hypothetical protein PFAM: protein of unknown function UPF0052 and CofD~KEGG: ypa:YPA_1065 hypothetical protein	3221023	3221946	+	SGene	3220523	3221023	3220729	1.98	rpoE	promoter=rpoE;box35pos=172;box35seq=aaaccc;box10pos=194;box10seq=tctaa
YPK_2924	YPK_2924	hypothetical protein PFAM: protein of unknown function UPF0052 and CofD~KEGG: ypa:YPA_1065 hypothetical protein	3221023	3221946	+	SGene	3220523	3221023	3220810	1.95	rpoS	promoter=rpoS;box35pos=248;box35seq=tataca;box10pos=274;box10seq=tattgt
YPK_2924	YPK_2924	hypothetical protein PFAM: protein of unknown function UPF0052 and CofD~KEGG: ypa:YPA_1065 hypothetical protein	3221023	3221946	+	SGene	3220523	3221023	3220737	1.96	rpoD	promoter=rpoD;box35pos=181;box35seq=ttttcc;box10pos=202;box10seq=taaaat
YPK_2949	YPK_2949	phospho-2-dehydro-3-deoxyheptonate aldolase tryptOPeronhan sensitive; catalyzes the formation of 3-deoxy-D-arabino-hept-2-ulosonate 7 phosphate from phosphoenolpyruvate and D-erythrose 4-phosphate	3247268	3248320	-	TSS	3248335	3248835	3249117	1.94	rpoE	promoter=rpoE;box35pos=182;box35seq=tactcg;box10pos=207;box10seq=tcgaa
YPK_2949	YPK_2949	phospho-2-dehydro-3-deoxyheptonate aldolase tryptOPeronhan sensitive; catalyzes the formation of 3-deoxy-D-arabino-hept-2-ulosonate 7 phosphate from phosphoenolpyruvate and D-erythrose 4-phosphate	3247268	3248320	-	TSS	3248335	3248835	3249109	1.92	rpoS	promoter=rpoS;box35pos=189;box35seq=ttgccg;box10pos=213;box10seq=taactt
YPK_2949	YPK_2949	phospho-2-dehydro-3-deoxyheptonate aldolase tryptOPeronhan sensitive; catalyzes the formation of 3-deoxy-D-arabino-hept-2-ulosonate 7 phosphate from phosphoenolpyruvate and D-erythrose 4-phosphate	3247268	3248320	-	TSS	3248335	3248835	3248899	1.92	rpoD	promoter=rpoD;box35pos=401;box35seq=tagctt;box10pos=423;box10seq=taaaac
YPK_2956	tolB	translocation protein TolB forms dimers; may be involved in cell envelOPerone integrity; interacts with outer membrane proteins and with the C-terminal domain of inner membrane protein TolA	3254339	3255631	-	TSS	3255669	3256169	3256356	1.97	rpoD	promoter=rpoD;box35pos=276;box35seq=ttgtaa;box10pos=301;box10seq=tacttt
YPK_2972	sdhC	succinate dehydrogenase cytochrome b556 large membrane subunit TIGRFAM: succinate dehydrogenase, cytochrome b556 subunit~PFAM: succinate dehydrogenase cytochrome b subunit~KEGG: yps:YPTB1143 succinate dehydrogenase cytochrome b-556 subunit	3272044	3272433	-	TSS	3272596	3273096	3273250	1.95	rpoE	promoter=rpoE;box35pos=312;box35seq=acacta;box10pos=335;box10seq=tcgga
YPK_2972	sdhC	succinate dehydrogenase cytochrome b556 large membrane subunit TIGRFAM: succinate dehydrogenase, cytochrome b556 subunit~PFAM: succinate dehydrogenase cytochrome b subunit~KEGG: yps:YPTB1143 succinate dehydrogenase cytochrome b-556 subunit	3272044	3272433	-	TSS	3272596	3273096	3273387	1.95	rpoS	promoter=rpoS;box35pos=170;box35seq=cctatg;box10pos=196;box10seq=tacact
YPK_2972	sdhC	succinate dehydrogenase cytochrome b556 large membrane subunit TIGRFAM: succinate dehydrogenase, cytochrome b556 subunit~PFAM: succinate dehydrogenase cytochrome b subunit~KEGG: yps:YPTB1143 succinate dehydrogenase cytochrome b-556 subunit	3272044	3272433	-	TSS	3272596	3273096	3273388	1.96	rpoD	promoter=rpoD;box35pos=172;box35seq=tatgat;box10pos=196;box10seq=tacact
YPK_2974	YPK_2974	heat shock protein GrpE with DnaK and DnaJ acts in response to hyperosmotic and heat shock by preventing the aggregation of stress-denatured proteins; may act as a thermosensor	3274531	3275109	-	TSS	3275143	3275643	3275782	1.9	rpoD	promoter=rpoD;box35pos=326;box35seq=gtgctg;box10pos=349;box10seq=tatgat
YPK_2977	YPK_2977	hypothetical protein PFAM: SmpA/OmlA domain protein~KEGG: yps:YPTB1138 conserved hypothetical small protein A precursor	3277976	3278317	+	TSS	3277402	3277902	3277779	1.9	rpoD	promoter=rpoD;box35pos=340;box35seq=ctgaaa;box10pos=365;box10seq=taaaaa
YPK_3006	YPK_3006	PhoH family protein PFAM: PhoH family protein~KEGG: ypm:YP_1094 phosphate starvation-inducible protein PhoH, predicted ATPase	3307101	3308174	+	TSS	3306449	3306949	3306852	1.97	rpoE	promoter=rpoE;box35pos=370;box35seq=acaggt;box10pos=392;box10seq=gcgta
YPK_3006	YPK_3006	PhoH family protein PFAM: PhoH family protein~KEGG: ypm:YP_1094 phosphate starvation-inducible protein PhoH, predicted ATPase	3307101	3308174	+	TSS	3306449	3306949	3306888	1.95	rpoS	promoter=rpoS;box35pos=405;box35seq=ctgcat;box10pos=426;box10seq=tatttt
YPK_3006	YPK_3006	PhoH family protein PFAM: PhoH family protein~KEGG: ypm:YP_1094 phosphate starvation-inducible protein PhoH, predicted ATPase	3307101	3308174	+	TSS	3306449	3306949	3306815	1.91	rpoD	promoter=rpoD;box35pos=332;box35seq=tccatt;box10pos=354;box10seq=taacat
YPK_3020	YPK_3020	rRNA large subunit methyltransferase SPOUT methyltransferase family protein; crystal structure shows homodimer; in Escherichia coli this protein methylates pseudouridine at position 1915 of the 23S ribosomal RNA	3321531	3322001	+	TSS	3320737	3321237	3321032	1.92	rpoS	promoter=rpoS;box35pos=255;box35seq=tttcta;box10pos=282;box10seq=tatact
YPK_3020	YPK_3020	rRNA large subunit methyltransferase SPOUT methyltransferase family protein; crystal structure shows homodimer; in Escherichia coli this protein methylates pseudouridine at position 1915 of the 23S ribosomal RNA	3321531	3322001	+	TSS	3320737	3321237	3321031	1.91	rpoD	promoter=rpoD;box35pos=255;box35seq=tttcta;box10pos=282;box10seq=tatact
YPK_3034	YPK_3034	hypothetical protein KEGG: ypi:YpsIP31758_2961 hypothetical protein	3334593	3335558	+	TSS	3333926	3334426	3334218	1.97	rpoE	promoter=rpoE;box35pos=256;box35seq=gcactc;box10pos=281;box10seq=tctgt
YPK_3034	YPK_3034	hypothetical protein KEGG: ypi:YpsIP31758_2961 hypothetical protein	3334593	3335558	+	TSS	3333926	3334426	3334196	1.93	rpoS	promoter=rpoS;box35pos=232;box35seq=ttggct;box10pos=257;box10seq=cactct
YPK_3034	YPK_3034	hypothetical protein KEGG: ypi:YpsIP31758_2961 hypothetical protein	3334593	3335558	+	TSS	3333926	3334426	3334277	1.96	rpoD	promoter=rpoD;box35pos=312;box35seq=tatcat;box10pos=339;box10seq=tatgca
YPK_3035	YPK_3035	hypothetical protein KEGG: ypi:YpsIP31758_2963 hypothetical protein	3335937	3336131	-	TSS	3336152	3336652	3336937	1.97	rpoE	promoter=rpoE;box35pos=186;box35seq=aaaagt;box10pos=204;box10seq=tcagt
YPK_3035	YPK_3035	hypothetical protein KEGG: ypi:YpsIP31758_2963 hypothetical protein	3335937	3336131	-	TSS	3336152	3336652	3336915	1.96	rpoS	promoter=rpoS;box35pos=202;box35seq=tttcag;box10pos=224;box10seq=tatgat
YPK_3035	YPK_3035	hypothetical protein KEGG: ypi:YpsIP31758_2963 hypothetical protein	3335937	3336131	-	TSS	3336152	3336652	3336848	1.96	rpoD	promoter=rpoD;box35pos=269;box35seq=gtgttt;box10pos=292;box10seq=tatctt
YPK_3047	YPK_3047	hypothetical protein KEGG: ypi:YpsIP31758_2975 hypothetical protein	3349185	3349334	-	OPeron	3352804	3353304	3353599	1.94	rpoE	promoter=rpoE;box35pos=176;box35seq=tgactg;box10pos=194;box10seq=gctga
YPK_3047	YPK_3047	hypothetical protein KEGG: ypi:YpsIP31758_2975 hypothetical protein	3349185	3349334	-	OPeron	3352804	3353304	3353538	1.95	rpoS	promoter=rpoS;box35pos=225;box35seq=ctgacg;box10pos=253;box10seq=cattct
YPK_3047	YPK_3047	hypothetical protein KEGG: ypi:YpsIP31758_2975 hypothetical protein	3349185	3349334	-	OPeron	3352804	3353304	3353448	1.96	rpoD	promoter=rpoD;box35pos=322;box35seq=gcgatt;box10pos=343;box10seq=tattaa
YPK_3057	YPK_3057	hypothetical protein KEGG: yps:YPTB1066 hypothetical protein	3364145	3364987	+	OPeron	3363645	3364145	3363898	1.98	rpoE	promoter=rpoE;box35pos=222;box35seq=gcaaat;box10pos=242;box10seq=tctaa
YPK_3057	YPK_3057	hypothetical protein KEGG: yps:YPTB1066 hypothetical protein	3364145	3364987	+	OPeron	3363645	3364145	3363924	1.94	rpoS	promoter=rpoS;box35pos=242;box35seq=tctaaa;box10pos=266;box10seq=taccca
YPK_3057	YPK_3057	hypothetical protein KEGG: yps:YPTB1066 hypothetical protein	3364145	3364987	+	OPeron	3363645	3364145	3363908	1.97	rpoD	promoter=rpoD;box35pos=227;box35seq=taatta;box10pos=250;box10seq=taagtt
YPK_3059	YPK_3059	hypothetical protein PFAM: protein of unknown function DUF1240~KEGG: yps:YPTB1065 hypothetical protein	3365629	3366006	+	SGene	3365129	3365629	3365576	1.94	rpoE	promoter=rpoE;box35pos=418;box35seq=gaaaaa;box10pos=436;box10seq=acata
YPK_3059	YPK_3059	hypothetical protein PFAM: protein of unknown function DUF1240~KEGG: yps:YPTB1065 hypothetical protein	3365629	3366006	+	SGene	3365129	3365629	3365333	1.95	rpoS	promoter=rpoS;box35pos=169;box35seq=tatcag;box10pos=191;box10seq=tatagt
YPK_3059	YPK_3059	hypothetical protein PFAM: protein of unknown function DUF1240~KEGG: yps:YPTB1065 hypothetical protein	3365629	3366006	+	SGene	3365129	3365629	3365579	1.96	rpoD	promoter=rpoD;box35pos=416;box35seq=gcgaaa;box10pos=439;box10seq=tagagt
YPK_3060	YPK_3060	Hcp1 family type VI secretion system effector TIGRFAM: type VI secretion system effector, Hcp1 family~PFAM: protein of unknown function DUF796~KEGG: ypi:YpsIP31758_2983 hypothetical protein	3366134	3366613	-	OPeron	3367166	3367666	3367896	1.96	rpoE	promoter=rpoE;box35pos=237;box35seq=aaactg;box10pos=259;box10seq=gctca
YPK_3060	YPK_3060	Hcp1 family type VI secretion system effector TIGRFAM: type VI secretion system effector, Hcp1 family~PFAM: protein of unknown function DUF796~KEGG: ypi:YpsIP31758_2983 hypothetical protein	3366134	3366613	-	OPeron	3367166	3367666	3367956	1.92	rpoS	promoter=rpoS;box35pos=170;box35seq=gaggac;box10pos=197;box10seq=tactct
YPK_3060	YPK_3060	Hcp1 family type VI secretion system effector TIGRFAM: type VI secretion system effector, Hcp1 family~PFAM: protein of unknown function DUF796~KEGG: ypi:YpsIP31758_2983 hypothetical protein	3366134	3366613	-	OPeron	3367166	3367666	3367918	1.96	rpoD	promoter=rpoD;box35pos=214;box35seq=tattaa;box10pos=236;box10seq=caaact
YPK_3071	YPK_3071	hypothetical protein KEGG: ypi:YpsIP31758_2993 hypothetical protein	3377386	3377916	+	OPeron	3374686	3375186	3375078	1.94	rpoE	promoter=rpoE;box35pos=358;box35seq=tactta;box10pos=381;box10seq=tcact
YPK_3071	YPK_3071	hypothetical protein KEGG: ypi:YpsIP31758_2993 hypothetical protein	3377386	3377916	+	OPeron	3374686	3375186	3375037	1.95	rpoS	promoter=rpoS;box35pos=316;box35seq=tttata;box10pos=340;box10seq=tatatt
YPK_3071	YPK_3071	hypothetical protein KEGG: ypi:YpsIP31758_2993 hypothetical protein	3377386	3377916	+	OPeron	3374686	3375186	3375070	1.96	rpoD	promoter=rpoD;box35pos=344;box35seq=ttgaac;box10pos=372;box10seq=catcat
YPK_3089	YPK_3089	hypothetical protein KEGG: ypm:YP_0858 hypothetical protein	3394036	3394236	+	SGene	3393536	3394036	3393986	1.95	rpoE	promoter=rpoE;box35pos=419;box35seq=gacata;box10pos=439;box10seq=actta
YPK_3089	YPK_3089	hypothetical protein KEGG: ypm:YP_0858 hypothetical protein	3394036	3394236	+	SGene	3393536	3394036	3393985	1.91	rpoS	promoter=rpoS;box35pos=417;box35seq=cagaca;box10pos=438;box10seq=tactta
YPK_3089	YPK_3089	hypothetical protein KEGG: ypm:YP_0858 hypothetical protein	3394036	3394236	+	SGene	3393536	3394036	3393973	1.96	rpoD	promoter=rpoD;box35pos=401;box35seq=tcccca;box10pos=425;box10seq=taggat
YPK_3091	YPK_3091	tail assembly chaperone gp38 PFAM: tail assembly chaperone gp38~KEGG: yps:YPTB1820 putative phage tail fiber assembly protein	3394937	3395353	-	OPeron	3398829	3399329	3399405	1.96	rpoE	promoter=rpoE;box35pos=388;box35seq=acaata;box10pos=413;box10seq=gcgaa
YPK_3091	YPK_3091	tail assembly chaperone gp38 PFAM: tail assembly chaperone gp38~KEGG: yps:YPTB1820 putative phage tail fiber assembly protein	3394937	3395353	-	OPeron	3398829	3399329	3399381	1.95	rpoS	promoter=rpoS;box35pos=410;box35seq=tgggcg;box10pos=435;box10seq=tatagt
YPK_3091	YPK_3091	tail assembly chaperone gp38 PFAM: tail assembly chaperone gp38~KEGG: yps:YPTB1820 putative phage tail fiber assembly protein	3394937	3395353	-	OPeron	3398829	3399329	3399440	1.97	rpoD	promoter=rpoD;box35pos=349;box35seq=tgaaaa;box10pos=377;box10seq=tatttt
YPK_3116	YPK_3116	Mu P family protein PFAM: Mu P family protein~KEGG: ecx:EcHS_A2087 bacteriOPeronhage Mu P protein	3412087	3413157	-	OPeron	3415167	3415667	3415937	1.94	rpoE	promoter=rpoE;box35pos=194;box35seq=taattt;box10pos=219;box10seq=tccaa
YPK_3116	YPK_3116	Mu P family protein PFAM: Mu P family protein~KEGG: ecx:EcHS_A2087 bacteriOPeronhage Mu P protein	3412087	3413157	-	OPeron	3415167	3415667	3415855	1.95	rpoS	promoter=rpoS;box35pos=278;box35seq=ttgaag;box10pos=299;box10seq=taatat
YPK_3116	YPK_3116	Mu P family protein PFAM: Mu P family protein~KEGG: ecx:EcHS_A2087 bacteriOPeronhage Mu P protein	3412087	3413157	-	OPeron	3415167	3415667	3415959	1.96	rpoD	promoter=rpoD;box35pos=168;box35seq=ctcacc;box10pos=194;box10seq=taattt
YPK_3131	YPK_3131	hypothetical protein PFAM: protein of unknown function DUF1219~KEGG: yps:YPTB3866 hypothetical protein	3425308	3425691	-	OPeron	3425691	3426191	3426254	1.93	rpoE	promoter=rpoE;box35pos=408;box35seq=taaagc;box10pos=426;box10seq=gcaaa
YPK_3131	YPK_3131	hypothetical protein PFAM: protein of unknown function DUF1219~KEGG: yps:YPTB3866 hypothetical protein	3425308	3425691	-	OPeron	3425691	3426191	3426263	1.91	rpoS	promoter=rpoS;box35pos=394;box35seq=tggata;box10pos=415;box10seq=aaccct
YPK_3131	YPK_3131	hypothetical protein PFAM: protein of unknown function DUF1219~KEGG: yps:YPTB3866 hypothetical protein	3425308	3425691	-	OPeron	3425691	3426191	3426292	1.9	rpoD	promoter=rpoD;box35pos=358;box35seq=ttttta;box10pos=386;box10seq=taatga
YPK_3135	YPK_3135	hypothetical protein KEGG: eca:ECA2856 hypothetical protein	3427548	3427886	-	OPeron	3428371	3428871	3429003	1.95	rpoE	promoter=rpoE;box35pos=333;box35seq=aaaata;box10pos=357;box10seq=gcaat
YPK_3135	YPK_3135	hypothetical protein KEGG: eca:ECA2856 hypothetical protein	3427548	3427886	-	OPeron	3428371	3428871	3429007	1.93	rpoS	promoter=rpoS;box35pos=330;box35seq=tttaaa;box10pos=351;box10seq=aataca
YPK_3135	YPK_3135	hypothetical protein KEGG: eca:ECA2856 hypothetical protein	3427548	3427886	-	OPeron	3428371	3428871	3428961	1.94	rpoD	promoter=rpoD;box35pos=373;box35seq=tttata;box10pos=396;box10seq=gataat
YPK_3137	YPK_3137	HSR1-like GTP-binding protein PFAM: GTP-binding protein HSR1-related~KEGG: eca:ECA2860 hypothetical protein	3428872	3429759	-	OPeron	3431233	3431733	3431988	1.98	rpoE	promoter=rpoE;box35pos=211;box35seq=gatttt;box10pos=234;box10seq=tctaa
YPK_3137	YPK_3137	HSR1-like GTP-binding protein PFAM: GTP-binding protein HSR1-related~KEGG: eca:ECA2860 hypothetical protein	3428872	3429759	-	OPeron	3431233	3431733	3432025	1.95	rpoS	promoter=rpoS;box35pos=173;box35seq=ttttta;box10pos=195;box10seq=tacacc
YPK_3137	YPK_3137	HSR1-like GTP-binding protein PFAM: GTP-binding protein HSR1-related~KEGG: eca:ECA2860 hypothetical protein	3428872	3429759	-	OPeron	3431233	3431733	3431984	1.97	rpoD	promoter=rpoD;box35pos=214;box35seq=tttaag;box10pos=236;box10seq=taagat
YPK_3147	YPK_3147	hypothetical protein PFAM: TetratricOPeroneptide TPR_2 repeat protein~KEGG: dps:DP2999 hypothetical protein	3439672	3442944	+	OPeron	3438843	3439343	3439177	1.9	rpoS	promoter=rpoS;box35pos=297;box35seq=ctcaca;box10pos=321;box10seq=aatgct
YPK_3147	YPK_3147	hypothetical protein PFAM: TetratricOPeroneptide TPR_2 repeat protein~KEGG: dps:DP2999 hypothetical protein	3439672	3442944	+	OPeron	3438843	3439343	3439160	1.97	rpoD	promoter=rpoD;box35pos=277;box35seq=taagaa;box10pos=305;box10seq=taccgt
YPK_3153	YPK_3153	peptidyl-prolyl cis-trans isomerase B PFAM: peptidyl-prolyl cis-trans isomerase cyclOPeronhilin type~KEGG: ypi:YpsIP31758_3015 peptidyl-prolyl cis-trans isomerase B	3448595	3449089	+	TSS	3448039	3448539	3448372	1.94	rpoE	promoter=rpoE;box35pos=302;box35seq=gaattc;box10pos=322;box10seq=tcagt
YPK_3153	YPK_3153	peptidyl-prolyl cis-trans isomerase B PFAM: peptidyl-prolyl cis-trans isomerase cyclOPeronhilin type~KEGG: ypi:YpsIP31758_3015 peptidyl-prolyl cis-trans isomerase B	3448595	3449089	+	TSS	3448039	3448539	3448436	1.93	rpoD	promoter=rpoD;box35pos=363;box35seq=tttatt;box10pos=385;box10seq=taaaca
YPK_3159	YPK_3159	multifunctional acyl-CoA thioesterase I/protease I/lysOPeronhospholipase L1 PFAM: lipolytic protein G-D-S-L family~KEGG: ypi:YpsIP31758_3021 GDSL-like lipase/acylhydrolase family protein	3454913	3455485	+	SGene	3454413	3454913	3454852	1.9	rpoD	promoter=rpoD;box35pos=405;box35seq=ttgctc;box10pos=428;box10seq=tattaa
YPK_3162	YPK_3162	hypothetical protein PFAM: band 7 protein~KEGG: ypi:YpsIP31758_3024 SPFH/band 7 family protein	3457789	3458703	+	TSS	3457259	3457759	3457597	1.9	rpoD	promoter=rpoD;box35pos=298;box35seq=gctaaa;box10pos=326;box10seq=tattgt
YPK_3168	YPK_3168	hypothetical protein KEGG: ypi:YpsIP31758_3619 hypothetical protein	3464737	3464994	+	OPeron	3463692	3464192	3464007	1.98	rpoE	promoter=rpoE;box35pos=280;box35seq=tcatta;box10pos=303;box10seq=tcaca
YPK_3168	YPK_3168	hypothetical protein KEGG: ypi:YpsIP31758_3619 hypothetical protein	3464737	3464994	+	OPeron	3463692	3464192	3464009	1.96	rpoS	promoter=rpoS;box35pos=278;box35seq=tttcat;box10pos=304;box10seq=cacact
YPK_3168	YPK_3168	hypothetical protein KEGG: ypi:YpsIP31758_3619 hypothetical protein	3464737	3464994	+	OPeron	3463692	3464192	3464022	1.97	rpoD	promoter=rpoD;box35pos=289;box35seq=ttgtta;box10pos=317;box10seq=gataat
YPK_3169	YPK_3169	hypothetical protein KEGG: ypi:YpsIP31758_3031 hypothetical protein	3465008	3465247	+	OPeron	3463692	3464192	3464007	1.98	rpoE	promoter=rpoE;box35pos=280;box35seq=tcatta;box10pos=303;box10seq=tcaca
YPK_3169	YPK_3169	hypothetical protein KEGG: ypi:YpsIP31758_3031 hypothetical protein	3465008	3465247	+	OPeron	3463692	3464192	3464009	1.96	rpoS	promoter=rpoS;box35pos=278;box35seq=tttcat;box10pos=304;box10seq=cacact
YPK_3169	YPK_3169	hypothetical protein KEGG: ypi:YpsIP31758_3031 hypothetical protein	3465008	3465247	+	OPeron	3463692	3464192	3464022	1.97	rpoD	promoter=rpoD;box35pos=289;box35seq=ttgtta;box10pos=317;box10seq=gataat
YPK_3182	YPK_3182	NAD-dependent epimerase/dehydratase PFAM: NAD-dependent epimerase/dehydratase~KEGG: ypi:YpsIP31758_3040 GDP-L-fucose synthetase	3479306	3480271	-	OPeron	3485076	3485576	3485858	1.98	rpoE	promoter=rpoE;box35pos=186;box35seq=aaaata;box10pos=208;box10seq=tcata
YPK_3182	YPK_3182	NAD-dependent epimerase/dehydratase PFAM: NAD-dependent epimerase/dehydratase~KEGG: ypi:YpsIP31758_3040 GDP-L-fucose synthetase	3479306	3480271	-	OPeron	3485076	3485576	3485727	1.96	rpoS	promoter=rpoS;box35pos=309;box35seq=gtgata;box10pos=336;box10seq=tatact
YPK_3182	YPK_3182	NAD-dependent epimerase/dehydratase PFAM: NAD-dependent epimerase/dehydratase~KEGG: ypi:YpsIP31758_3040 GDP-L-fucose synthetase	3479306	3480271	-	OPeron	3485076	3485576	3485821	1.97	rpoD	promoter=rpoD;box35pos=220;box35seq=ttaatt;box10pos=243;box10seq=taactt
YPK_3190	YPK_3190	CDP-glucose 4,6-dehydratase TIGRFAM: CDP-glucose 4,6-dehydratase~PFAM: NAD-dependent epimerase/dehydratase; polysaccharide biosynthesis protein CapD; Male sterility domain~KEGG: ypi:YpsIP31758_3050 CDP-glucose 4,6-dehydratase	3488912	3489985	-	OPeron	3491790	3492290	3492390	1.96	rpoE	promoter=rpoE;box35pos=366;box35seq=gacata;box10pos=389;box10seq=gctaa
YPK_3190	YPK_3190	CDP-glucose 4,6-dehydratase TIGRFAM: CDP-glucose 4,6-dehydratase~PFAM: NAD-dependent epimerase/dehydratase; polysaccharide biosynthesis protein CapD; Male sterility domain~KEGG: ypi:YpsIP31758_3050 CDP-glucose 4,6-dehydratase	3488912	3489985	-	OPeron	3491790	3492290	3492589	1.95	rpoS	promoter=rpoS;box35pos=165;box35seq=ctgccg;box10pos=188;box10seq=aactat
YPK_3190	YPK_3190	CDP-glucose 4,6-dehydratase TIGRFAM: CDP-glucose 4,6-dehydratase~PFAM: NAD-dependent epimerase/dehydratase; polysaccharide biosynthesis protein CapD; Male sterility domain~KEGG: ypi:YpsIP31758_3050 CDP-glucose 4,6-dehydratase	3488912	3489985	-	OPeron	3491790	3492290	3492434	1.96	rpoD	promoter=rpoD;box35pos=316;box35seq=gtgtcg;box10pos=344;box10seq=taagtt
YPK_3197	YPK_3197	hypothetical protein PFAM: conserved hypothetical protein~KEGG: ypi:YpsIP31758_3058 conserved hypothetical protein TIGR00103	3496982	3497314	-	TSS	3497375	3497875	3497959	1.93	rpoS	promoter=rpoS;box35pos=379;box35seq=tcgcct;box10pos=403;box10seq=aaagct
YPK_3197	YPK_3197	hypothetical protein PFAM: conserved hypothetical protein~KEGG: ypi:YpsIP31758_3058 conserved hypothetical protein TIGR00103	3496982	3497314	-	TSS	3497375	3497875	3498037	1.91	rpoD	promoter=rpoD;box35pos=298;box35seq=taaatg;box10pos=326;box10seq=taattt
YPK_3210	rpmE2	50S ribosomal protein L31 RpmE2; there appears to be two types of ribosomal proteins L31 in bacterial genomes; some contain a CxxC motif while others do not; Bacillus subtilis has both types; the proteins in this cluster do not have the CXXC motif; RpmE is found in exponentially g	3512647	3512907	+	OPeron	3512147	3512647	3512585	1.94	rpoE	promoter=rpoE;box35pos=409;box35seq=aaaaat;box10pos=427;box10seq=tcatt
YPK_3210	rpmE2	50S ribosomal protein L31 RpmE2; there appears to be two types of ribosomal proteins L31 in bacterial genomes; some contain a CxxC motif while others do not; Bacillus subtilis has both types; the proteins in this cluster do not have the CXXC motif; RpmE is found in exponentially g	3512647	3512907	+	OPeron	3512147	3512647	3512564	1.96	rpoD	promoter=rpoD;box35pos=381;box35seq=tatcct;box10pos=405;box10seq=tacaaa
YPK_3220	YPK_3220	nitrogen regulatory protein P-II 2 indirectly regulates nitrogen metabolism; at high nitrogen levels P-II 2 prevents the phosphorylation of NR-I, the transcriptional activator of the glutamine synthetase gene (glnA); at low nitrogen levels P-II 2 is uridylylated to form PII-UMP and interac	3519721	3520059	-	OPeron	3520059	3520559	3520636	1.94	rpoE	promoter=rpoE;box35pos=388;box35seq=taagtg;box10pos=412;box10seq=tcaat
YPK_3220	YPK_3220	nitrogen regulatory protein P-II 2 indirectly regulates nitrogen metabolism; at high nitrogen levels P-II 2 prevents the phosphorylation of NR-I, the transcriptional activator of the glutamine synthetase gene (glnA); at low nitrogen levels P-II 2 is uridylylated to form PII-UMP and interac	3519721	3520059	-	OPeron	3520059	3520559	3520667	1.92	rpoD	promoter=rpoD;box35pos=356;box35seq=tctact;box10pos=379;box10seq=gagaat
YPK_3234	clpP	ATP-dependent Clp protease proteolytic subunit hydrolyzes proteins to small peptides; with the ATPase subunits ClpA or ClpX, ClpP degrades specific substrates	3537786	3538409	-	TSS	3538445	3538945	3539124	1.98	rpoE	promoter=rpoE;box35pos=289;box35seq=caacga;box10pos=310;box10seq=tcata
YPK_3234	clpP	ATP-dependent Clp protease proteolytic subunit hydrolyzes proteins to small peptides; with the ATPase subunits ClpA or ClpX, ClpP degrades specific substrates	3537786	3538409	-	TSS	3538445	3538945	3539105	1.95	rpoS	promoter=rpoS;box35pos=302;box35seq=cagatg;box10pos=327;box10seq=tattgt
YPK_3234	clpP	ATP-dependent Clp protease proteolytic subunit hydrolyzes proteins to small peptides; with the ATPase subunits ClpA or ClpX, ClpP degrades specific substrates	3537786	3538409	-	TSS	3538445	3538945	3539120	1.96	rpoD	promoter=rpoD;box35pos=286;box35seq=ttacaa;box10pos=313;box10seq=tactat
YPK_3240	YPK_3240	hypothetical protein KEGG: ypi:YpsIP31758_3097 hypothetical protein	3543719	3543832	+	TSS	3543154	3543654	3543549	1.96	rpoE	promoter=rpoE;box35pos=362;box35seq=aaaccc;box10pos=384;box10seq=tcaat
YPK_3240	YPK_3240	hypothetical protein KEGG: ypi:YpsIP31758_3097 hypothetical protein	3543719	3543832	+	TSS	3543154	3543654	3543573	1.92	rpoS	promoter=rpoS;box35pos=382;box35seq=tttcaa;box10pos=406;box10seq=aacttt
YPK_3240	YPK_3240	hypothetical protein KEGG: ypi:YpsIP31758_3097 hypothetical protein	3543719	3543832	+	TSS	3543154	3543654	3543527	1.92	rpoD	promoter=rpoD;box35pos=335;box35seq=tttatc;box10pos=361;box10seq=taaacc
YPK_3262	secD	preprotein translocase subunit SecD part of the preprotein secretory system; when complexed with proteins SecF and YajC, SecDFyajC stimulates the proton motive force-driven protein translocation, and appears to be required for the release of mature proteins from the extracytOPeronlasmic side of	3566079	3567893	-	OPeron	3568289	3568789	3569051	1.93	rpoS	promoter=rpoS;box35pos=197;box35seq=ctgacg;box10pos=225;box10seq=taataa
YPK_3262	secD	preprotein translocase subunit SecD part of the preprotein secretory system; when complexed with proteins SecF and YajC, SecDFyajC stimulates the proton motive force-driven protein translocation, and appears to be required for the release of mature proteins from the extracytOPeronlasmic side of	3566079	3567893	-	OPeron	3568289	3568789	3569033	1.91	rpoD	promoter=rpoD;box35pos=221;box35seq=ctggta;box10pos=244;box10seq=tagtgt
YPK_3267	YPK_3267	alkyl hydrOPeroneroxide reductase PFAM: alkyl hydrOPeroneroxide reductase/ Thiol specific antioxidant/ Mal allergen; Redoxin domain protein~KEGG: ypm:YP_0737 putative alkyl hydrOPeroneroxide reductase subunit c	3571791	3572393	+	TSS	3571144	3571644	3571475	1.95	rpoE	promoter=rpoE;box35pos=295;box35seq=caatga;box10pos=320;box10seq=gcaga
YPK_3267	YPK_3267	alkyl hydrOPeroneroxide reductase PFAM: alkyl hydrOPeroneroxide reductase/ Thiol specific antioxidant/ Mal allergen; Redoxin domain protein~KEGG: ypm:YP_0737 putative alkyl hydrOPeroneroxide reductase subunit c	3571791	3572393	+	TSS	3571144	3571644	3571516	1.95	rpoS	promoter=rpoS;box35pos=331;box35seq=ttaaaa;box10pos=359;box10seq=tacggt
YPK_3267	YPK_3267	alkyl hydrOPeroneroxide reductase PFAM: alkyl hydrOPeroneroxide reductase/ Thiol specific antioxidant/ Mal allergen; Redoxin domain protein~KEGG: ypm:YP_0737 putative alkyl hydrOPeroneroxide reductase subunit c	3571791	3572393	+	TSS	3571144	3571644	3571488	1.97	rpoD	promoter=rpoD;box35pos=306;box35seq=caggca;box10pos=332;box10seq=taaaat
YPK_3271	YPK_3271	maltodextrin glucosidase PFAM: alpha amylase catalytic region~SMART: alpha amylase catalytic sub domain~KEGG: yps:YPTB0922 putative maltodextrin glucosidase category=G group=COG0366 glycosidases'	3575590	3577419	-	SGene	3577419	3577919	3578216	1.97	rpoE	promoter=rpoE;box35pos=172;box35seq=taacta;box10pos=192;box10seq=tctaa
YPK_3271	YPK_3271	maltodextrin glucosidase PFAM: alpha amylase catalytic region~SMART: alpha amylase catalytic sub domain~KEGG: yps:YPTB0922 putative maltodextrin glucosidase category=G group=COG0366 glycosidases'	3575590	3577419	-	SGene	3577419	3577919	3578014	1.94	rpoS	promoter=rpoS;box35pos=367;box35seq=tagaca;box10pos=392;box10seq=tataaa
YPK_3271	YPK_3271	maltodextrin glucosidase PFAM: alpha amylase catalytic region~SMART: alpha amylase catalytic sub domain~KEGG: yps:YPTB0922 putative maltodextrin glucosidase category=G group=COG0366 glycosidases'	3575590	3577419	-	SGene	3577419	3577919	3578211	1.96	rpoD	promoter=rpoD;box35pos=166;box35seq=tggata;box10pos=194;box10seq=taaata
YPK_3281	YPK_3281	hypothetical protein PFAM: protein of unknown function DUF1255~KEGG: ypi:YpsIP31758_3142 hypothetical protein	3592130	3592417	-	TSS	3592447	3592947	3593037	1.97	rpoE	promoter=rpoE;box35pos=374;box35seq=caattg;box10pos=399;box10seq=gcaat
YPK_3281	YPK_3281	hypothetical protein PFAM: protein of unknown function DUF1255~KEGG: ypi:YpsIP31758_3142 hypothetical protein	3592130	3592417	-	TSS	3592447	3592947	3593009	1.94	rpoS	promoter=rpoS;box35pos=397;box35seq=tagcaa;box10pos=425;box10seq=tacaca
YPK_3281	YPK_3281	hypothetical protein PFAM: protein of unknown function DUF1255~KEGG: ypi:YpsIP31758_3142 hypothetical protein	3592130	3592417	-	TSS	3592447	3592947	3593227	1.96	rpoD	promoter=rpoD;box35pos=184;box35seq=tataac;box10pos=206;box10seq=taatat
YPK_3294	YPK_3294	LysR family transcriptional regulator KEGG: ypi:YpsIP31758_3155 transcriptional regulator, LysR family	3605112	3605897	-	SGene	3605897	3606397	3606633	1.98	rpoE	promoter=rpoE;box35pos=231;box35seq=gcaatt;box10pos=253;box10seq=tcaaa
YPK_3294	YPK_3294	LysR family transcriptional regulator KEGG: ypi:YpsIP31758_3155 transcriptional regulator, LysR family	3605112	3605897	-	SGene	3605897	3606397	3606629	1.96	rpoS	promoter=rpoS;box35pos=229;box35seq=ttgcaa;box10pos=255;box10seq=aaaaat
YPK_3294	YPK_3294	LysR family transcriptional regulator KEGG: ypi:YpsIP31758_3155 transcriptional regulator, LysR family	3605112	3605897	-	SGene	3605897	3606397	3606543	1.97	rpoD	promoter=rpoD;box35pos=320;box35seq=ttaaag;box10pos=342;box10seq=tattat
YPK_3297	YPK_3297	glycerOPeronhosphoryl diester phosphodiesterase PFAM: glycerOPeronhosphoryl diester phosphodiesterase~KEGG: yps:YPTB0895 hypothetical protein	3610887	3611834	+	SGene	3610387	3610887	3610612	1.98	rpoE	promoter=rpoE;box35pos=192;box35seq=aaaagg;box10pos=215;box10seq=tctat
YPK_3297	YPK_3297	glycerOPeronhosphoryl diester phosphodiesterase PFAM: glycerOPeronhosphoryl diester phosphodiesterase~KEGG: yps:YPTB0895 hypothetical protein	3610887	3611834	+	SGene	3610387	3610887	3610607	1.95	rpoS	promoter=rpoS;box35pos=184;box35seq=gttaaa;box10pos=207;box10seq=tatcct
YPK_3297	YPK_3297	glycerOPeronhosphoryl diester phosphodiesterase PFAM: glycerOPeronhosphoryl diester phosphodiesterase~KEGG: yps:YPTB0895 hypothetical protein	3610887	3611834	+	SGene	3610387	3610887	3610812	1.96	rpoD	promoter=rpoD;box35pos=386;box35seq=tttcat;box10pos=413;box10seq=taaatt
YPK_3338	YPK_3338	efflux pump membrane protein TIGRFAM: efflux pump membrane protein~PFAM: secretion protein HlyD family protein~KEGG: ypm:YP_0664 multidrug resistance protein A	3657645	3658817	+	OPeron	3657145	3657645	3657572	1.92	rpoE	promoter=rpoE;box35pos=391;box35seq=cacctg;box10pos=416;box10seq=acgaa
YPK_3338	YPK_3338	efflux pump membrane protein TIGRFAM: efflux pump membrane protein~PFAM: secretion protein HlyD family protein~KEGG: ypm:YP_0664 multidrug resistance protein A	3657645	3658817	+	OPeron	3657145	3657645	3657416	1.9	rpoS	promoter=rpoS;box35pos=235;box35seq=gttatc;box10pos=258;box10seq=aacaat
YPK_3338	YPK_3338	efflux pump membrane protein TIGRFAM: efflux pump membrane protein~PFAM: secretion protein HlyD family protein~KEGG: ypm:YP_0664 multidrug resistance protein A	3657645	3658817	+	OPeron	3657145	3657645	3657420	1.92	rpoD	promoter=rpoD;box35pos=235;box35seq=gttatc;box10pos=263;box10seq=taaaaa
YPK_3346	YPK_3346	hypothetical protein KEGG: ypi:YpsIP31758_3839 hypothetical protein	3668009	3668551	+	SGene	3667509	3668009	3667765	1.92	rpoE	promoter=rpoE;box35pos=224;box35seq=gaattg;box10pos=245;box10seq=tcaca
YPK_3346	YPK_3346	hypothetical protein KEGG: ypi:YpsIP31758_3839 hypothetical protein	3668009	3668551	+	SGene	3667509	3668009	3667782	1.91	rpoD	promoter=rpoD;box35pos=238;box35seq=ctaaaa;box10pos=259;box10seq=tattat
YPK_3353	YPK_3353	sigma 54 modulation protein/30S ribosomal protein S30EA TIGRFAM: ribosomal subunit interface protein~PFAM: sigma 54 modulation protein/ribosomal protein S30EA~KEGG: ypi:YpsIP31758_3216 ribosomal subunit interface protein	3679712	3680074	+	TSS	3679178	3679678	3679580	1.94	rpoE	promoter=rpoE;box35pos=366;box35seq=acatta;box10pos=391;box10seq=tcaaa
YPK_3353	YPK_3353	sigma 54 modulation protein/30S ribosomal protein S30EA TIGRFAM: ribosomal subunit interface protein~PFAM: sigma 54 modulation protein/ribosomal protein S30EA~KEGG: ypi:YpsIP31758_3216 ribosomal subunit interface protein	3679712	3680074	+	TSS	3679178	3679678	3679514	1.93	rpoS	promoter=rpoS;box35pos=296;box35seq=gtccca;box10pos=323;box10seq=cattct
YPK_3353	YPK_3353	sigma 54 modulation protein/30S ribosomal protein S30EA TIGRFAM: ribosomal subunit interface protein~PFAM: sigma 54 modulation protein/ribosomal protein S30EA~KEGG: ypi:YpsIP31758_3216 ribosomal subunit interface protein	3679712	3680074	+	TSS	3679178	3679678	3679546	1.96	rpoD	promoter=rpoD;box35pos=333;box35seq=tatatg;box10pos=357;box10seq=gataat
YPK_3356	tyrA	bifunctional chorismate mutase/prephenate dehydrogenase catalyzes the formation of prephenate from chorismate and the formation of 4-hydroxyphenylpyruvate from prephenate in tyrosine biosynthesis	3681698	3682819	-	OPeron	3683908	3684408	3684617	1.95	rpoE	promoter=rpoE;box35pos=255;box35seq=gaacaa;box10pos=280;box10seq=gcgaa
YPK_3356	tyrA	bifunctional chorismate mutase/prephenate dehydrogenase catalyzes the formation of prephenate from chorismate and the formation of 4-hydroxyphenylpyruvate from prephenate in tyrosine biosynthesis	3681698	3682819	-	OPeron	3683908	3684408	3684695	1.94	rpoS	promoter=rpoS;box35pos=174;box35seq=gtcccg;box10pos=200;box10seq=taaaat
YPK_3356	tyrA	bifunctional chorismate mutase/prephenate dehydrogenase catalyzes the formation of prephenate from chorismate and the formation of 4-hydroxyphenylpyruvate from prephenate in tyrosine biosynthesis	3681698	3682819	-	OPeron	3683908	3684408	3684696	1.96	rpoD	promoter=rpoD;box35pos=179;box35seq=gtgctc;box10pos=200;box10seq=taaaat
YPK_3371	YPK_3371	fructose-1-phosphatase YqaB; catalyzes the dephosphorylation of fructose 1-phosphate, 6-phosphogluconate and p-nitrOPeronhenyl phosphate (pNPP); presents beta-phosphoglucomutase activity at a lower extent	3696742	3697308	-	OPeron	3697308	3697808	3698086	1.97	rpoE	promoter=rpoE;box35pos=188;box35seq=taatgt;box10pos=211;box10seq=gccaa
YPK_3371	YPK_3371	fructose-1-phosphatase YqaB; catalyzes the dephosphorylation of fructose 1-phosphate, 6-phosphogluconate and p-nitrOPeronhenyl phosphate (pNPP); presents beta-phosphoglucomutase activity at a lower extent	3696742	3697308	-	OPeron	3697308	3697808	3698107	1.95	rpoS	promoter=rpoS;box35pos=165;box35seq=caggat;box10pos=188;box10seq=taatgt
YPK_3371	YPK_3371	fructose-1-phosphatase YqaB; catalyzes the dephosphorylation of fructose 1-phosphate, 6-phosphogluconate and p-nitrOPeronhenyl phosphate (pNPP); presents beta-phosphoglucomutase activity at a lower extent	3696742	3697308	-	OPeron	3697308	3697808	3698049	1.96	rpoD	promoter=rpoD;box35pos=219;box35seq=cagaaa;box10pos=247;box10seq=taatat
YPK_3382	YPK_3382	transketolase domain-containing protein PFAM: Transketolase central region; Transketolase domain protein~KEGG: ypm:YP_0373 C-terminal region of transketolase	3710438	3711382	-	OPeron	3712205	3712705	3712811	1.9	rpoD	promoter=rpoD;box35pos=355;box35seq=ttgcat;box10pos=382;box10seq=gataat
YPK_3383	YPK_3383	transketolase domain-containing protein PFAM: Transketolase domain protein~KEGG: ypm:YP_0372 putative N-terminal region of transketolase	3711375	3712205	-	OPeron	3712205	3712705	3712811	1.9	rpoD	promoter=rpoD;box35pos=355;box35seq=ttgcat;box10pos=382;box10seq=gataat
YPK_3385	YPK_3385	ABC transporter-like protein PFAM: ABC transporter related~SMART: AAA ATPase~KEGG: yps:YPTB0814 ABC sugar transporter, fused ATP-binding domains	3713593	3715116	-	OPeron	3716767	3717267	3717323	1.97	rpoE	promoter=rpoE;box35pos=413;box35seq=tcaatc;box10pos=433;box10seq=tcaat
YPK_3385	YPK_3385	ABC transporter-like protein PFAM: ABC transporter related~SMART: AAA ATPase~KEGG: yps:YPTB0814 ABC sugar transporter, fused ATP-binding domains	3713593	3715116	-	OPeron	3716767	3717267	3717356	1.94	rpoS	promoter=rpoS;box35pos=372;box35seq=ctgccc;box10pos=398;box10seq=aatatt
YPK_3385	YPK_3385	ABC transporter-like protein PFAM: ABC transporter related~SMART: AAA ATPase~KEGG: yps:YPTB0814 ABC sugar transporter, fused ATP-binding domains	3713593	3715116	-	OPeron	3716767	3717267	3717324	1.96	rpoD	promoter=rpoD;box35pos=403;box35seq=tcgcag;box10pos=431;box10seq=tatcaa
YPK_3404	YPK_3404	tartrate/fumarate subfamily Fe-S type hydro-lyase subunit beta TIGRFAM: hydro-lyase, Fe-S type, tartrate/fumarate subfamily, alpha subunit; hydro-lyase, Fe-S type, tartrate/fumarate subfamily, beta subunit~PFAM: Fe-S type hydro-lyase tartrate/fumarate alpha region; Fe-S type hydro-lyase tartrate/fumarate beta region~	3736290	3737933	+	TSS	3735587	3736087	3735920	1.98	rpoE	promoter=rpoE;box35pos=299;box35seq=taatgt;box10pos=323;box10seq=tcagt
YPK_3404	YPK_3404	tartrate/fumarate subfamily Fe-S type hydro-lyase subunit beta TIGRFAM: hydro-lyase, Fe-S type, tartrate/fumarate subfamily, alpha subunit; hydro-lyase, Fe-S type, tartrate/fumarate subfamily, beta subunit~PFAM: Fe-S type hydro-lyase tartrate/fumarate alpha region; Fe-S type hydro-lyase tartrate/fumarate beta region~	3736290	3737933	+	TSS	3735587	3736087	3735900	1.92	rpoS	promoter=rpoS;box35pos=278;box35seq=tcgctg;box10pos=299;box10seq=taatgt
YPK_3412	YPK_3412	arogenate dehydratase PFAM: extracellular solute-binding protein family 3~KEGG: ypi:YpsIP31758_3279 polar amino acid ABC transporter, periplasmic amino acid-binding protein	3745360	3746124	+	SGene	3744860	3745360	3745208	1.94	rpoS	promoter=rpoS;box35pos=307;box35seq=tttaca;box10pos=335;box10seq=aaatat
YPK_3412	YPK_3412	arogenate dehydratase PFAM: extracellular solute-binding protein family 3~KEGG: ypi:YpsIP31758_3279 polar amino acid ABC transporter, periplasmic amino acid-binding protein	3745360	3746124	+	SGene	3744860	3745360	3745131	1.91	rpoD	promoter=rpoD;box35pos=238;box35seq=ctttaa;box10pos=259;box10seq=taatat
YPK_3421	YPK_3421	alcohol dehydrogenase PFAM: Alcohol dehydrogenase zinc-binding domain protein; Alcohol dehydrogenase GroES domain protein~KEGG: ypm:YP_0335 putative zinc-binding dehydrogenase	3753437	3754552	-	TSS	3754663	3755163	3755384	1.98	rpoE	promoter=rpoE;box35pos=244;box35seq=gacttg;box10pos=269;box10seq=gcaaa
YPK_3421	YPK_3421	alcohol dehydrogenase PFAM: Alcohol dehydrogenase zinc-binding domain protein; Alcohol dehydrogenase GroES domain protein~KEGG: ypm:YP_0335 putative zinc-binding dehydrogenase	3753437	3754552	-	TSS	3754663	3755163	3755418	1.95	rpoS	promoter=rpoS;box35pos=207;box35seq=tatata;box10pos=232;box10seq=tatctt
YPK_3421	YPK_3421	alcohol dehydrogenase PFAM: Alcohol dehydrogenase zinc-binding domain protein; Alcohol dehydrogenase GroES domain protein~KEGG: ypm:YP_0335 putative zinc-binding dehydrogenase	3753437	3754552	-	TSS	3754663	3755163	3755447	1.97	rpoD	promoter=rpoD;box35pos=181;box35seq=ttgact;box10pos=204;box10seq=gaatat
YPK_3422	YPK_3422	ribose-5-phosphate isomerase B catalyzes the interconversion of ribose 5-phosphate to ribulose 5-phosphate; enzyme from E. coli shows allose 6-phosphate isomerase activity	3755035	3755490	+	TSS	3754378	3754878	3754813	1.98	rpoE	promoter=rpoE;box35pos=402;box35seq=caatta;box10pos=424;box10seq=gctga
YPK_3422	YPK_3422	ribose-5-phosphate isomerase B catalyzes the interconversion of ribose 5-phosphate to ribulose 5-phosphate; enzyme from E. coli shows allose 6-phosphate isomerase activity	3755035	3755490	+	TSS	3754378	3754878	3754687	1.94	rpoS	promoter=rpoS;box35pos=273;box35seq=tttaac;box10pos=296;box10seq=tatgat
YPK_3422	YPK_3422	ribose-5-phosphate isomerase B catalyzes the interconversion of ribose 5-phosphate to ribulose 5-phosphate; enzyme from E. coli shows allose 6-phosphate isomerase activity	3755035	3755490	+	TSS	3754378	3754878	3754796	1.96	rpoD	promoter=rpoD;box35pos=381;box35seq=catcaa;box10pos=406;box10seq=taaaaa
YPK_3426	nlpD	lipOPeronrotein NlpD outer membrane lipOPeronrotein involved in stationary-phase cell survival; similar to LppB virulence determinant from HaemOPeronhilus somnus	3760292	3761275	-	OPeron	3761275	3761775	3762054	1.9	rpoS	promoter=rpoS;box35pos=186;box35seq=ttcatt;box10pos=208;box10seq=tacttt
YPK_3426	nlpD	lipOPeronrotein NlpD outer membrane lipOPeronrotein involved in stationary-phase cell survival; similar to LppB virulence determinant from HaemOPeronhilus somnus	3760292	3761275	-	OPeron	3761275	3761775	3762050	1.92	rpoD	promoter=rpoD;box35pos=190;box35seq=ttgtta;box10pos=213;box10seq=taatgt
YPK_3428	surE	stationary phase survival protein SurE catalyzes the conversion of a phosphate monoester to an alcohol and a phosphate	3762017	3762781	-	OPeron	3764307	3764807	3765029	1.9	rpoS	promoter=rpoS;box35pos=237;box35seq=ccggta;box10pos=265;box10seq=aatgct
YPK_3428	surE	stationary phase survival protein SurE catalyzes the conversion of a phosphate monoester to an alcohol and a phosphate	3762017	3762781	-	OPeron	3764307	3764807	3764960	1.91	rpoD	promoter=rpoD;box35pos=310;box35seq=ttaacg;box10pos=335;box10seq=taataa
YPK_3440	YPK_3440	phosphoadenosine phosphosulfate reductase catalyzes the reduction of 3'-phosphoadenylyl sulfate into sulfite	3772466	3773200	-	TSS	3773837	3774337	3774615	1.91	rpoS	promoter=rpoS;box35pos=183;box35seq=tttacg;box10pos=209;box10seq=cacgct
YPK_3440	YPK_3440	phosphoadenosine phosphosulfate reductase catalyzes the reduction of 3'-phosphoadenylyl sulfate into sulfite	3772466	3773200	-	TSS	3773837	3774337	3774445	1.93	rpoD	promoter=rpoD;box35pos=358;box35seq=ttgcct;box10pos=380;box10seq=caaagt
YPK_3441	YPK_3441	sulfite reductase subunit beta hemOPeronrotein; NADPH dependent; with the alpha subunit (a flavOPeronrotein) catalyzes the reduction of sulfite to sulfide	3773197	3774927	-	OPeron	3776729	3777229	3777440	1.95	rpoE	promoter=rpoE;box35pos=260;box35seq=aaaaat;box10pos=278;box10seq=tcaat
YPK_3441	YPK_3441	sulfite reductase subunit beta hemOPeronrotein; NADPH dependent; with the alpha subunit (a flavOPeronrotein) catalyzes the reduction of sulfite to sulfide	3773197	3774927	-	OPeron	3776729	3777229	3777525	1.95	rpoS	promoter=rpoS;box35pos=170;box35seq=tttcag;box10pos=191;box10seq=taaagt
YPK_3441	YPK_3441	sulfite reductase subunit beta hemOPeronrotein; NADPH dependent; with the alpha subunit (a flavOPeronrotein) catalyzes the reduction of sulfite to sulfide	3773197	3774927	-	OPeron	3776729	3777229	3777505	1.94	rpoD	promoter=rpoD;box35pos=189;box35seq=gttaaa;box10pos=212;box10seq=gaaatt
YPK_3446	eno	phosphOPeronyruvate hydratase enolase; catalyzes the formation of phosphoenolpyruvate from 2-phospho-D-glycerate in glycolysis	3779467	3780762	-	TSS	3781252	3781752	3781895	1.94	rpoD	promoter=rpoD;box35pos=323;box35seq=ccggca;box10pos=345;box10seq=gatcat
YPK_3447	pyrG	CTP synthetase CTP synthase; cytidine triphosphate synthetase; catalyzes the ATP-dependent amination of UTP to CTP with either L-glutamine or ammonia as the source of nitrogen; in Escherichia coli this enzyme forms a homotetramer	3780843	3782480	-	TSS	3782526	3783026	3783305	1.94	rpoE	promoter=rpoE;box35pos=190;box35seq=taactt;box10pos=210;box10seq=tccat
YPK_3447	pyrG	CTP synthetase CTP synthase; cytidine triphosphate synthetase; catalyzes the ATP-dependent amination of UTP to CTP with either L-glutamine or ammonia as the source of nitrogen; in Escherichia coli this enzyme forms a homotetramer	3780843	3782480	-	TSS	3782526	3783026	3783323	1.96	rpoS	promoter=rpoS;box35pos=166;box35seq=cttaca;box10pos=190;box10seq=taactt
YPK_3447	pyrG	CTP synthetase CTP synthase; cytidine triphosphate synthetase; catalyzes the ATP-dependent amination of UTP to CTP with either L-glutamine or ammonia as the source of nitrogen; in Escherichia coli this enzyme forms a homotetramer	3780843	3782480	-	TSS	3782526	3783026	3783324	1.92	rpoD	promoter=rpoD;box35pos=166;box35seq=cttaca;box10pos=190;box10seq=taactt
YPK_3460	YPK_3460	iron-hydroxamate transporter permease subunit part of the FhuBCD ATP-dependent iron (III) hydroxamate transporter involved in the high-affinity transport of Fe(3+)-ferrichrome	3799266	3801263	-	OPeron	3803106	3803606	3803875	1.95	rpoE	promoter=rpoE;box35pos=197;box35seq=aaagga;box10pos=221;box10seq=gctga
YPK_3460	YPK_3460	iron-hydroxamate transporter permease subunit part of the FhuBCD ATP-dependent iron (III) hydroxamate transporter involved in the high-affinity transport of Fe(3+)-ferrichrome	3799266	3801263	-	OPeron	3803106	3803606	3803723	1.91	rpoS	promoter=rpoS;box35pos=342;box35seq=ttgatc;box10pos=370;box10seq=taggtt
YPK_3460	YPK_3460	iron-hydroxamate transporter permease subunit part of the FhuBCD ATP-dependent iron (III) hydroxamate transporter involved in the high-affinity transport of Fe(3+)-ferrichrome	3799266	3801263	-	OPeron	3803106	3803606	3803724	1.9	rpoD	promoter=rpoD;box35pos=342;box35seq=ttgatc;box10pos=370;box10seq=taggtt
YPK_3468	dksA	RNA polymerase-binding transcription factor TIGRFAM: RNA polymerase-binding protein DksA~PFAM: zinc finger DksA/TraR C4-type~KEGG: ypi:YpsIP31758_3338 RNA polymerase-binding protein DksA	3810277	3810732	+	TSS	3809720	3810220	3810147	1.92	rpoE	promoter=rpoE;box35pos=393;box35seq=gcaatt;box10pos=416;box10seq=gccaa
YPK_3468	dksA	RNA polymerase-binding transcription factor TIGRFAM: RNA polymerase-binding protein DksA~PFAM: zinc finger DksA/TraR C4-type~KEGG: ypi:YpsIP31758_3338 RNA polymerase-binding protein DksA	3810277	3810732	+	TSS	3809720	3810220	3810137	1.91	rpoD	promoter=rpoD;box35pos=381;box35seq=ctgaat;box10pos=405;box10seq=taaagt
YPK_3473	panC	pantoate--beta-alanine ligase catalyzes the formation of (R)-pantothenate from pantoate and beta-alanine	3815212	3816066	+	OPeron	3813827	3814327	3814253	1.95	rpoS	promoter=rpoS;box35pos=391;box35seq=ttgcag;box10pos=413;box10seq=taatct
YPK_3473	panC	pantoate--beta-alanine ligase catalyzes the formation of (R)-pantothenate from pantoate and beta-alanine	3815212	3816066	+	OPeron	3813827	3814327	3814169	1.96	rpoD	promoter=rpoD;box35pos=309;box35seq=gcgttg;box10pos=330;box10seq=tatatt
YPK_3488	YPK_3488	transposase IS200-family protein PFAM: transposase IS200-family protein~KEGG: ypa:YPA_1072 transposase for the IS1541 insertion element	3831618	3832076	-	SGene	3832076	3832576	3832875	1.98	rpoE	promoter=rpoE;box35pos=167;box35seq=gaccgt;box10pos=189;box10seq=gctgt
YPK_3488	YPK_3488	transposase IS200-family protein PFAM: transposase IS200-family protein~KEGG: ypa:YPA_1072 transposase for the IS1541 insertion element	3831618	3832076	-	SGene	3832076	3832576	3832870	1.96	rpoS	promoter=rpoS;box35pos=172;box35seq=tttcac;box10pos=193;box10seq=tacatt
YPK_3488	YPK_3488	transposase IS200-family protein PFAM: transposase IS200-family protein~KEGG: ypa:YPA_1072 transposase for the IS1541 insertion element	3831618	3832076	-	SGene	3832076	3832576	3832856	1.96	rpoD	promoter=rpoD;box35pos=179;box35seq=tttatt;box10pos=207;box10seq=tacatt
YPK_3506	YPK_3506	transposase IS200-family protein PFAM: transposase IS200-family protein~KEGG: ypi:YpsIP31758_3905 IS1541, transposase	3851831	3852289	-	OPeron	3852890	3853390	3853506	1.92	rpoE	promoter=rpoE;box35pos=352;box35seq=gatcat;box10pos=373;box10seq=gctca
YPK_3506	YPK_3506	transposase IS200-family protein PFAM: transposase IS200-family protein~KEGG: ypi:YpsIP31758_3905 IS1541, transposase	3851831	3852289	-	OPeron	3852890	3853390	3853555	1.95	rpoS	promoter=rpoS;box35pos=299;box35seq=ctgcaa;box10pos=322;box10seq=tatatt
YPK_3506	YPK_3506	transposase IS200-family protein PFAM: transposase IS200-family protein~KEGG: ypi:YpsIP31758_3905 IS1541, transposase	3851831	3852289	-	OPeron	3852890	3853390	3853556	1.94	rpoD	promoter=rpoD;box35pos=299;box35seq=ctgcaa;box10pos=322;box10seq=tatatt
YPK_3513	YPK_3513	cell division protein FtsZ GTPase; similar structure to tubulin; forms ring-shaped polymers at the site of cell division; other proteins such as FtsA, ZipA, and ZapA, interact with and regulate FtsZ function	3858340	3859491	-	TSS	3859561	3860061	3860127	1.91	rpoS	promoter=rpoS;box35pos=394;box35seq=ttgcaa;box10pos=421;box10seq=aacact
YPK_3513	YPK_3513	cell division protein FtsZ GTPase; similar structure to tubulin; forms ring-shaped polymers at the site of cell division; other proteins such as FtsA, ZipA, and ZapA, interact with and regulate FtsZ function	3858340	3859491	-	TSS	3859561	3860061	3860209	1.93	rpoD	promoter=rpoD;box35pos=319;box35seq=ttgtaa;box10pos=340;box10seq=taaatt
YPK_3516	ddl	D-alanine--D-alanine ligase D-alanine--D-alanine ligase; DdlA; DdlB; cytOPeronlasmic; catalyzes the formation of D-alanyl-D-alanine from two D-alanines in peptidoglycan synthesis; there are two forms of this enzyme in Escherichia coli	3861676	3862596	-	OPeron	3864091	3864591	3864777	1.98	rpoE	promoter=rpoE;box35pos=284;box35seq=gccccc;box10pos=303;box10seq=gcaat
YPK_3516	ddl	D-alanine--D-alanine ligase D-alanine--D-alanine ligase; DdlA; DdlB; cytOPeronlasmic; catalyzes the formation of D-alanyl-D-alanine from two D-alanines in peptidoglycan synthesis; there are two forms of this enzyme in Escherichia coli	3861676	3862596	-	OPeron	3864091	3864591	3864745	1.94	rpoS	promoter=rpoS;box35pos=311;box35seq=ttccaa;box10pos=333;box10seq=tatgct
YPK_3516	ddl	D-alanine--D-alanine ligase D-alanine--D-alanine ligase; DdlA; DdlB; cytOPeronlasmic; catalyzes the formation of D-alanyl-D-alanine from two D-alanines in peptidoglycan synthesis; there are two forms of this enzyme in Escherichia coli	3861676	3862596	-	OPeron	3864091	3864591	3864746	1.94	rpoD	promoter=rpoD;box35pos=311;box35seq=ttccaa;box10pos=333;box10seq=tatgct
YPK_3525	YPK_3525	cell division protein FtsL membrane bound cell division protein at septum containing leucine zipper motif	3873542	3873859	-	OPeron	3875279	3875779	3875953	1.98	rpoE	promoter=rpoE;box35pos=294;box35seq=tcagta;box10pos=315;box10seq=tcgaa
YPK_3525	YPK_3525	cell division protein FtsL membrane bound cell division protein at septum containing leucine zipper motif	3873542	3873859	-	OPeron	3875279	3875779	3875959	1.95	rpoS	promoter=rpoS;box35pos=286;box35seq=tctcac;box10pos=307;box10seq=tacact
YPK_3525	YPK_3525	cell division protein FtsL membrane bound cell division protein at septum containing leucine zipper motif	3873542	3873859	-	OPeron	3875279	3875779	3876005	1.96	rpoD	promoter=rpoD;box35pos=234;box35seq=taaata;box10pos=262;box10seq=cattat
YPK_3528	YPK_3528	hypothetical protein PFAM: protein of unknown function DUF1144~KEGG: ypm:YP_3639 hypothetical protein	3876381	3876821	+	TSS	3875757	3876257	3876207	1.97	rpoE	promoter=rpoE;box35pos=420;box35seq=gataaa;box10pos=439;box10seq=tcaaa
YPK_3528	YPK_3528	hypothetical protein PFAM: protein of unknown function DUF1144~KEGG: ypm:YP_3639 hypothetical protein	3876381	3876821	+	TSS	3875757	3876257	3876192	1.94	rpoS	promoter=rpoS;box35pos=396;box35seq=caaaaa;box10pos=422;box10seq=taaagt
YPK_3528	YPK_3528	hypothetical protein PFAM: protein of unknown function DUF1144~KEGG: ypm:YP_3639 hypothetical protein	3876381	3876821	+	TSS	3875757	3876257	3876191	1.96	rpoD	promoter=rpoD;box35pos=396;box35seq=caaaaa;box10pos=422;box10seq=taaagt
YPK_3532	YPK_3532	AMP-dependent synthetase and ligase PFAM: AMP-dependent synthetase and ligase~KEGG: ypi:YpsIP31758_3402 AMP binding protein	3881097	3882902	-	SGene	3882902	3883402	3883522	1.92	rpoD	promoter=rpoD;box35pos=343;box35seq=tctatt;box10pos=368;box10seq=gaaaaa
YPK_3563	YPK_3563	hypothetical protein PFAM: protein of unknown function DUF796~KEGG: ypi:YpsIP31758_3434 hypothetical protein	3925548	3926066	-	SGene	3926066	3926566	3926827	1.94	rpoS	promoter=rpoS;box35pos=199;box35seq=tagaaa;box10pos=226;box10seq=tacctt
YPK_3563	YPK_3563	hypothetical protein PFAM: protein of unknown function DUF796~KEGG: ypi:YpsIP31758_3434 hypothetical protein	3925548	3926066	-	SGene	3926066	3926566	3926855	1.92	rpoD	promoter=rpoD;box35pos=178;box35seq=tttcct;box10pos=199;box10seq=tagaaa
YPK_3577	YPK_3577	hypothetical protein KEGG: ypn:YPN_0362 hypothetical protein	3941038	3941259	-	SGene	3941259	3941759	3941889	1.98	rpoE	promoter=rpoE;box35pos=335;box35seq=aaacca;box10pos=359;box10seq=gcaga
YPK_3577	YPK_3577	hypothetical protein KEGG: ypn:YPN_0362 hypothetical protein	3941038	3941259	-	SGene	3941259	3941759	3941900	1.96	rpoS	promoter=rpoS;box35pos=321;box35seq=ttaaaa;box10pos=346;box10seq=tagaat
YPK_3577	YPK_3577	hypothetical protein KEGG: ypn:YPN_0362 hypothetical protein	3941038	3941259	-	SGene	3941259	3941759	3941936	1.96	rpoD	promoter=rpoD;box35pos=286;box35seq=tttaca;box10pos=310;box10seq=taaaaa
YPK_3583	YPK_3583	carbamoyl phosphate synthase small subunit catalyzes production of carbamoyl phosphate from bicarbonate and glutamine in pyrimidine and arginine biosynthesis pathways; forms an octamer composed of four CarAB dimers	3948048	3949223	-	TSS	3949255	3949755	3949873	1.98	rpoE	promoter=rpoE;box35pos=351;box35seq=aaattt;box10pos=370;box10seq=acaat
YPK_3583	YPK_3583	carbamoyl phosphate synthase small subunit catalyzes production of carbamoyl phosphate from bicarbonate and glutamine in pyrimidine and arginine biosynthesis pathways; forms an octamer composed of four CarAB dimers	3948048	3949223	-	TSS	3949255	3949755	3949835	1.95	rpoS	promoter=rpoS;box35pos=381;box35seq=ttgccc;box10pos=406;box10seq=taaaaa
YPK_3583	YPK_3583	carbamoyl phosphate synthase small subunit catalyzes production of carbamoyl phosphate from bicarbonate and glutamine in pyrimidine and arginine biosynthesis pathways; forms an octamer composed of four CarAB dimers	3948048	3949223	-	TSS	3949255	3949755	3949875	1.97	rpoD	promoter=rpoD;box35pos=348;box35seq=tttaaa;box10pos=369;box10seq=gacaat
YPK_3594	dnaK	molecular chaperone DnaK heat shock protein 70; assists in folding of nascent polypeptide chains; refolding of misfolded proteins; utilizes ATPase activity to help fold; co-chaperones are DnaJ and GrpE; multiple cOPeronies in some bacteria	3961444	3963354	-	TSS	3963393	3963893	3964142	1.98	rpoE	promoter=rpoE;box35pos=219;box35seq=gatcat;box10pos=240;box10seq=actga
YPK_3594	dnaK	molecular chaperone DnaK heat shock protein 70; assists in folding of nascent polypeptide chains; refolding of misfolded proteins; utilizes ATPase activity to help fold; co-chaperones are DnaJ and GrpE; multiple cOPeronies in some bacteria	3961444	3963354	-	TSS	3963393	3963893	3964045	1.96	rpoS	promoter=rpoS;box35pos=313;box35seq=gttctg;box10pos=335;box10seq=tatgaa
YPK_3594	dnaK	molecular chaperone DnaK heat shock protein 70; assists in folding of nascent polypeptide chains; refolding of misfolded proteins; utilizes ATPase activity to help fold; co-chaperones are DnaJ and GrpE; multiple cOPeronies in some bacteria	3961444	3963354	-	TSS	3963393	3963893	3964072	1.96	rpoD	promoter=rpoD;box35pos=284;box35seq=cttatt;box10pos=309;box10seq=tagcgt
YPK_3596	YPK_3596	N-acetyltransferase GCN5 PFAM: GCN5-related N-acetyltransferase~KEGG: ypp:YPDSF_3165 hypothetical protein	3964629	3967085	+	SGene	3964129	3964629	3964579	1.98	rpoE	promoter=rpoE;box35pos=414;box35seq=taaagt;box10pos=435;box10seq=tcata
YPK_3596	YPK_3596	N-acetyltransferase GCN5 PFAM: GCN5-related N-acetyltransferase~KEGG: ypp:YPDSF_3165 hypothetical protein	3964629	3967085	+	SGene	3964129	3964629	3964435	1.95	rpoS	promoter=rpoS;box35pos=266;box35seq=tttaat;box10pos=293;box10seq=cactct
YPK_3596	YPK_3596	N-acetyltransferase GCN5 PFAM: GCN5-related N-acetyltransferase~KEGG: ypp:YPDSF_3165 hypothetical protein	3964629	3967085	+	SGene	3964129	3964629	3964509	1.98	rpoD	promoter=rpoD;box35pos=346;box35seq=aaccaa;box10pos=368;box10seq=tataaa
YPK_3604	thrA	bifunctional aspartokinase I/homoserine dehydrogenase I multifunctional homotetrameric enzyme that catalyzes the phosphorylation of aspartate to form aspartyl-4-phosphate as well as conversion of aspartate semialdehyde to homoserine; functions in a number of amino acid biosynthetic pathways	3974849	3977308	-	TSS	3977526	3978026	3978312	1.98	rpoE	promoter=rpoE;box35pos=178;box35seq=taatat;box10pos=203;box10seq=gctat
YPK_3604	thrA	bifunctional aspartokinase I/homoserine dehydrogenase I multifunctional homotetrameric enzyme that catalyzes the phosphorylation of aspartate to form aspartyl-4-phosphate as well as conversion of aspartate semialdehyde to homoserine; functions in a number of amino acid biosynthetic pathways	3974849	3977308	-	TSS	3977526	3978026	3978217	1.96	rpoS	promoter=rpoS;box35pos=275;box35seq=tttaaa;box10pos=296;box10seq=caccct
YPK_3604	thrA	bifunctional aspartokinase I/homoserine dehydrogenase I multifunctional homotetrameric enzyme that catalyzes the phosphorylation of aspartate to form aspartyl-4-phosphate as well as conversion of aspartate semialdehyde to homoserine; functions in a number of amino acid biosynthetic pathways	3974849	3977308	-	TSS	3977526	3978026	3978325	1.97	rpoD	promoter=rpoD;box35pos=165;box35seq=tcgatt;box10pos=188;box10seq=taactt
YPK_3608	YPK_3608	hypothetical protein	3979765	3979950	-	OPeron	3979950	3980450	3980591	1.92	rpoS	promoter=rpoS;box35pos=318;box35seq=tttaaa;box10pos=346;box10seq=cattat
YPK_3608	YPK_3608	hypothetical protein	3979765	3979950	-	OPeron	3979950	3980450	3980556	1.9	rpoD	promoter=rpoD;box35pos=361;box35seq=ctgaag;box10pos=382;box10seq=gaatat
YPK_3610	YPK_3610	phosphoglycerate mutase catalyzes reactions involving the transfer of phospho groups between the three carbon atoms of phosphoglycerate	3980857	3981504	-	SGene	3981504	3982004	3982054	1.94	rpoS	promoter=rpoS;box35pos=412;box35seq=ctgcca;box10pos=437;box10seq=tatact
YPK_3610	YPK_3610	phosphoglycerate mutase catalyzes reactions involving the transfer of phospho groups between the three carbon atoms of phosphoglycerate	3980857	3981504	-	SGene	3981504	3982004	3982297	1.93	rpoD	promoter=rpoD;box35pos=172;box35seq=ttgacg;box10pos=195;box10seq=caatat
YPK_3634	rimI	ribosomal-protein-alanine N-acetyltransferase alanine acetyltransferase that specifically acetylates ribosomal protein S18	4011177	4011620	-	OPeron	4012002	4012502	4012735	1.95	rpoD	promoter=rpoD;box35pos=229;box35seq=cagccg;box10pos=255;box10seq=caatat
YPK_3646	YPK_3646	O-antigen polymerase PFAM: O-antigen polymerase~KEGG: ypm:YP_3764 putative O-antigen biosynthesis protein	4024171	4025403	-	OPeron	4026644	4027144	4027322	1.98	rpoE	promoter=rpoE;box35pos=286;box35seq=gaagat;box10pos=311;box10seq=tccat
YPK_3646	YPK_3646	O-antigen polymerase PFAM: O-antigen polymerase~KEGG: ypm:YP_3764 putative O-antigen biosynthesis protein	4024171	4025403	-	OPeron	4026644	4027144	4027204	1.92	rpoS	promoter=rpoS;box35pos=406;box35seq=ttgccg;box10pos=427;box10seq=tatgct
YPK_3646	YPK_3646	O-antigen polymerase PFAM: O-antigen polymerase~KEGG: ypm:YP_3764 putative O-antigen biosynthesis protein	4024171	4025403	-	OPeron	4026644	4027144	4027391	1.97	rpoD	promoter=rpoD;box35pos=219;box35seq=gcgcaa;box10pos=241;box10seq=tattaa
YPK_3659	YPK_3659	putative PTS system fructose-like transporter subunit EIIB FrwB with FrwC, FrwD and PtsA forms a PEP-dependent sugar phosphotransferase system (PTS) permease which may phosphorylate and transport sugars into the cell; cytOPeronlasmic protein that interacts with complex EIIA; contains the second phosphorylation site o	4041111	4041431	+	SGene	4040611	4041111	4040985	1.93	rpoE	promoter=rpoE;box35pos=342;box35seq=ggattt;box10pos=363;box10seq=gcggt
YPK_3659	YPK_3659	putative PTS system fructose-like transporter subunit EIIB FrwB with FrwC, FrwD and PtsA forms a PEP-dependent sugar phosphotransferase system (PTS) permease which may phosphorylate and transport sugars into the cell; cytOPeronlasmic protein that interacts with complex EIIA; contains the second phosphorylation site o	4041111	4041431	+	SGene	4040611	4041111	4041033	1.91	rpoS	promoter=rpoS;box35pos=385;box35seq=tttatt;box10pos=409;box10seq=taaggt
YPK_3659	YPK_3659	putative PTS system fructose-like transporter subunit EIIB FrwB with FrwC, FrwD and PtsA forms a PEP-dependent sugar phosphotransferase system (PTS) permease which may phosphorylate and transport sugars into the cell; cytOPeronlasmic protein that interacts with complex EIIA; contains the second phosphorylation site o	4041111	4041431	+	SGene	4040611	4041111	4041032	1.97	rpoD	promoter=rpoD;box35pos=385;box35seq=tttatt;box10pos=409;box10seq=taaggt
YPK_3662	YPK_3662	hypothetical protein KEGG: ypm:YP_3781 hypothetical protein	4042738	4043274	-	TSS	4043331	4043831	4043961	1.98	rpoE	promoter=rpoE;box35pos=339;box35seq=acacga;box10pos=360;box10seq=tctta
YPK_3662	YPK_3662	hypothetical protein KEGG: ypm:YP_3781 hypothetical protein	4042738	4043274	-	TSS	4043331	4043831	4043892	1.96	rpoS	promoter=rpoS;box35pos=405;box35seq=cctaaa;box10pos=426;box10seq=taaatt
YPK_3662	YPK_3662	hypothetical protein KEGG: ypm:YP_3781 hypothetical protein	4042738	4043274	-	TSS	4043331	4043831	4043956	1.97	rpoD	promoter=rpoD;box35pos=336;box35seq=tttaca;box10pos=363;box10seq=tattat
YPK_3676	YPK_3676	integrase family protein PFAM: integrase family protein~KEGG: ypn:YPN_0651 integrase	4059757	4061022	-	SGene	4061022	4061522	4061820	1.96	rpoE	promoter=rpoE;box35pos=170;box35seq=gacctc;box10pos=191;box10seq=acata
YPK_3676	YPK_3676	integrase family protein PFAM: integrase family protein~KEGG: ypn:YPN_0651 integrase	4059757	4061022	-	SGene	4061022	4061522	4061691	1.96	rpoD	promoter=rpoD;box35pos=295;box35seq=tagtat;box10pos=319;box10seq=tatacc
YPK_3678	YPK_3678	YjgP/YjgQ family permease PFAM: permease YjgP/YjgQ family protein~KEGG: ypi:YpsIP31758_3542 putative permease	4062486	4063580	-	OPeron	4063580	4064080	4064305	1.9	rpoD	promoter=rpoD;box35pos=235;box35seq=ttctaa;box10pos=263;box10seq=taagat
YPK_3683	YPK_3683	hypothetical protein PFAM: protein of unknown function DUF1260~KEGG: ypi:YpsIP31758_3548 hypothetical protein	4070035	4070466	-	TSS	4070498	4070998	4071198	1.98	rpoE	promoter=rpoE;box35pos=269;box35seq=gaaaaa;box10pos=289;box10seq=gctgt
YPK_3683	YPK_3683	hypothetical protein PFAM: protein of unknown function DUF1260~KEGG: ypi:YpsIP31758_3548 hypothetical protein	4070035	4070466	-	TSS	4070498	4070998	4071249	1.96	rpoS	promoter=rpoS;box35pos=213;box35seq=ttgtta;box10pos=236;box10seq=aattat
YPK_3683	YPK_3683	hypothetical protein PFAM: protein of unknown function DUF1260~KEGG: ypi:YpsIP31758_3548 hypothetical protein	4070035	4070466	-	TSS	4070498	4070998	4071252	1.97	rpoD	promoter=rpoD;box35pos=213;box35seq=ttgtta;box10pos=234;box10seq=gaaatt
YPK_3703	YPK_3703	hypothetical protein KEGG: yps:YPTB0507 hypothetical protein	4090025	4090663	-	SGene	4090663	4091163	4091457	1.94	rpoE	promoter=rpoE;box35pos=172;box35seq=gaccaa;box10pos=195;box10seq=gccga
YPK_3703	YPK_3703	hypothetical protein KEGG: yps:YPTB0507 hypothetical protein	4090025	4090663	-	SGene	4090663	4091163	4091437	1.92	rpoS	promoter=rpoS;box35pos=186;box35seq=tttacc;box10pos=213;box10seq=catttt
YPK_3703	YPK_3703	hypothetical protein KEGG: yps:YPTB0507 hypothetical protein	4090025	4090663	-	SGene	4090663	4091163	4091438	1.9	rpoD	promoter=rpoD;box35pos=186;box35seq=tttacc;box10pos=213;box10seq=catttt
YPK_3709	YPK_3709	extracellular solute-binding protein PFAM: extracellular solute-binding protein family 1~KEGG: ypi:YpsIP31758_3575 carbohydrate uptake ABC transporter-1 (CUT1) family, periplasmic carbohydrate-binding protein	4095424	4096737	-	OPeron	4096737	4097237	4097295	1.98	rpoE	promoter=rpoE;box35pos=408;box35seq=aaatta;box10pos=430;box10seq=tctat
YPK_3709	YPK_3709	extracellular solute-binding protein PFAM: extracellular solute-binding protein family 1~KEGG: ypi:YpsIP31758_3575 carbohydrate uptake ABC transporter-1 (CUT1) family, periplasmic carbohydrate-binding protein	4095424	4096737	-	OPeron	4096737	4097237	4097372	1.95	rpoS	promoter=rpoS;box35pos=326;box35seq=gtcaat;box10pos=354;box10seq=tagact
YPK_3709	YPK_3709	extracellular solute-binding protein PFAM: extracellular solute-binding protein family 1~KEGG: ypi:YpsIP31758_3575 carbohydrate uptake ABC transporter-1 (CUT1) family, periplasmic carbohydrate-binding protein	4095424	4096737	-	OPeron	4096737	4097237	4097532	1.98	rpoD	promoter=rpoD;box35pos=170;box35seq=ttgtaa;box10pos=193;box10seq=taaaaa
YPK_3714	YPK_3714	sterol-binding domain-containing protein PFAM: Sterol-binding domain protein~KEGG: ypp:YPDSF_3287 lipid carrier protein	4101750	4102352	-	TSS	4101834	4102334	4102411	1.91	rpoD	promoter=rpoD;box35pos=388;box35seq=tagcag;box10pos=411;box10seq=caagat
YPK_3720	YPK_3720	hypothetical protein PFAM: luciferase family protein~KEGG: ypi:YpsIP31758_3587 luciferase-like monooxygenase family protein	4110818	4111873	+	TSS	4110061	4110561	4110455	1.97	rpoE	promoter=rpoE;box35pos=364;box35seq=ccaata;box10pos=383;box10seq=gcaat
YPK_3720	YPK_3720	hypothetical protein PFAM: luciferase family protein~KEGG: ypi:YpsIP31758_3587 luciferase-like monooxygenase family protein	4110818	4111873	+	TSS	4110061	4110561	4110405	1.95	rpoS	promoter=rpoS;box35pos=307;box35seq=tcgact;box10pos=331;box10seq=tacgta
YPK_3720	YPK_3720	hypothetical protein PFAM: luciferase family protein~KEGG: ypi:YpsIP31758_3587 luciferase-like monooxygenase family protein	4110818	4111873	+	TSS	4110061	4110561	4110336	1.97	rpoD	promoter=rpoD;box35pos=239;box35seq=tttact;box10pos=263;box10seq=tacatt
YPK_3724	YPK_3724	ATP-dependent RNA helicase DeaD participates in the assembly of the large subunit of the ribosome; plays a key role in OPerontimal cell growth at low temperature and is required for normal cell division	4113067	4115061	-	TSS	4115907	4116407	4116562	1.98	rpoE	promoter=rpoE;box35pos=312;box35seq=gcccct;box10pos=334;box10seq=gctgt
YPK_3724	YPK_3724	ATP-dependent RNA helicase DeaD participates in the assembly of the large subunit of the ribosome; plays a key role in OPerontimal cell growth at low temperature and is required for normal cell division	4113067	4115061	-	TSS	4115907	4116407	4116542	1.95	rpoS	promoter=rpoS;box35pos=325;box35seq=gagcaa;box10pos=352;box10seq=tactct
YPK_3724	YPK_3724	ATP-dependent RNA helicase DeaD participates in the assembly of the large subunit of the ribosome; plays a key role in OPerontimal cell growth at low temperature and is required for normal cell division	4113067	4115061	-	TSS	4115907	4116407	4116641	1.9	rpoD	promoter=rpoD;box35pos=226;box35seq=tttcct;box10pos=254;box10seq=taaaca
YPK_3725	YPK_3725	lipOPeronrotein NlpI lipOPeronrotein that appears to be involved in cell division; interacts with the periplasmic protease Prc and may be activated by protease processing	4115248	4116132	-	SGene	4116132	4116632	4116894	1.96	rpoE	promoter=rpoE;box35pos=206;box35seq=caactt;box10pos=227;box10seq=gcaca
YPK_3725	YPK_3725	lipOPeronrotein NlpI lipOPeronrotein that appears to be involved in cell division; interacts with the periplasmic protease Prc and may be activated by protease processing	4115248	4116132	-	SGene	4116132	4116632	4116869	1.94	rpoS	promoter=rpoS;box35pos=224;box35seq=ctggca;box10pos=250;box10seq=tagtct
YPK_3726	YPK_3726	polynucleotide phosphorylase/polyadenylase KEGG: ypa:YPA_2992 polyribonucleotide nucleotidyltransferase~PFAM: 3' exoribonuclease; RNA binding S1 domain protein; KH type 1 domain protein; Exoribonuclease, phosphorolytic domain 2; Polynucleotide phosphorylase, phosphorolytic RNA-binding, bacterial/o	4116257	4118374	-	TSS	4118464	4118964	4119256	1.98	rpoE	promoter=rpoE;box35pos=172;box35seq=gactta;box10pos=197;box10seq=tcgat
YPK_3726	YPK_3726	polynucleotide phosphorylase/polyadenylase KEGG: ypa:YPA_2992 polyribonucleotide nucleotidyltransferase~PFAM: 3' exoribonuclease; RNA binding S1 domain protein; KH type 1 domain protein; Exoribonuclease, phosphorolytic domain 2; Polynucleotide phosphorylase, phosphorolytic RNA-binding, bacterial/o	4116257	4118374	-	TSS	4118464	4118964	4119259	1.93	rpoS	promoter=rpoS;box35pos=167;box35seq=tcgcag;box10pos=192;box10seq=aacgtt
YPK_3744	YPK_3744	hypothetical protein KEGG: ypi:YpsIP31758_0044 hypothetical protein	4137424	4137795	+	TSS	4136898	4137398	4137177	1.9	rpoS	promoter=rpoS;box35pos=240;box35seq=ttgatt;box10pos=266;box10seq=taacct
YPK_3744	YPK_3744	hypothetical protein KEGG: ypi:YpsIP31758_0044 hypothetical protein	4137424	4137795	+	TSS	4136898	4137398	4137155	1.92	rpoD	promoter=rpoD;box35pos=224;box35seq=ctgaac;box10pos=245;box10seq=tatatt
YPK_3748	YPK_3748	hypothetical protein KEGG: ecv:APECO1_3699 hypothetical protein	4139579	4140007	-	OPeron	4141959	4142459	4142516	1.98	rpoE	promoter=rpoE;box35pos=407;box35seq=aacgtt;box10pos=432;box10seq=actga
YPK_3748	YPK_3748	hypothetical protein KEGG: ecv:APECO1_3699 hypothetical protein	4139579	4140007	-	OPeron	4141959	4142459	4142524	1.96	rpoS	promoter=rpoS;box35pos=397;box35seq=gttcca;box10pos=422;box10seq=taaatt
YPK_3748	YPK_3748	hypothetical protein KEGG: ecv:APECO1_3699 hypothetical protein	4139579	4140007	-	OPeron	4141959	4142459	4142686	1.96	rpoD	promoter=rpoD;box35pos=234;box35seq=tcaaca;box10pos=261;box10seq=tattct
YPK_3757	rplU	50S ribosomal protein L21 PFAM: ribosomal protein L21~KEGG: ypi:YpsIP31758_3612 ribosomal protein L21	4145797	4146108	-	TSS	4146176	4146676	4146957	1.91	rpoD	promoter=rpoD;box35pos=181;box35seq=ctgaat;box10pos=207;box10seq=gattat
YPK_3775	YPK_3775	adenosine-3'(2'),5'-bisphosphate nucleotidase catalyzes the formation of AMP from adenosine-3',5'-bisphosphate	4164621	4165361	-	TSS	4165564	4166064	4166353	1.95	rpoE	promoter=rpoE;box35pos=179;box35seq=acatat;box10pos=201;box10seq=acgaa
YPK_3775	YPK_3775	adenosine-3'(2'),5'-bisphosphate nucleotidase catalyzes the formation of AMP from adenosine-3',5'-bisphosphate	4164621	4165361	-	TSS	4165564	4166064	4166362	1.95	rpoS	promoter=rpoS;box35pos=161;box35seq=tacata;box10pos=189;box10seq=tataca
YPK_3775	YPK_3775	adenosine-3'(2'),5'-bisphosphate nucleotidase catalyzes the formation of AMP from adenosine-3',5'-bisphosphate	4164621	4165361	-	TSS	4165564	4166064	4166363	1.96	rpoD	promoter=rpoD;box35pos=167;box35seq=ttcttt;box10pos=189;box10seq=tataca
YPK_3785	YPK_3785	hypothetical protein KEGG: yps:YPTB0437 hypothetical protein	4172453	4172731	-	TSS	4172797	4173297	4173401	1.94	rpoE	promoter=rpoE;box35pos=363;box35seq=acacgg;box10pos=384;box10seq=gcaaa
YPK_3785	YPK_3785	hypothetical protein KEGG: yps:YPTB0437 hypothetical protein	4172453	4172731	-	TSS	4172797	4173297	4173348	1.91	rpoS	promoter=rpoS;box35pos=415;box35seq=ttgacg;box10pos=436;box10seq=tacgtt
YPK_3785	YPK_3785	hypothetical protein KEGG: yps:YPTB0437 hypothetical protein	4172453	4172731	-	TSS	4172797	4173297	4173550	1.92	rpoD	promoter=rpoD;box35pos=214;box35seq=tttcta;box10pos=235;box10seq=cataat
YPK_3795	YPK_3795	FtsH protease regulator HflC with HflK inhibits proteolysis of lambda cII protein by FtsH	4182405	4183409	-	OPeron	4184675	4185175	4185370	1.97	rpoE	promoter=rpoE;box35pos=274;box35seq=gctctt;box10pos=295;box10seq=gccaa
YPK_3795	YPK_3795	FtsH protease regulator HflC with HflK inhibits proteolysis of lambda cII protein by FtsH	4182405	4183409	-	OPeron	4184675	4185175	4185360	1.94	rpoS	promoter=rpoS;box35pos=281;box35seq=tttaca;box10pos=302;box10seq=aacgat
YPK_3795	YPK_3795	FtsH protease regulator HflC with HflK inhibits proteolysis of lambda cII protein by FtsH	4182405	4183409	-	OPeron	4184675	4185175	4185409	1.96	rpoD	promoter=rpoD;box35pos=228;box35seq=ttaacc;box10pos=253;box10seq=gaatat
YPK_3805	YPK_3805	iron-sulfur cluster binding protein TIGRFAM: iron-sulfur cluster binding protein~PFAM: 4Fe-4S ferredoxin iron-sulfur binding domain protein; domain of unknown function DUF1730~KEGG: ypi:YpsIP31758_3660 iron-sulfur cluster-binding protein	4193591	4194730	+	SGene	4193091	4193591	4193531	1.93	rpoE	promoter=rpoE;box35pos=408;box35seq=gcacac;box10pos=428;box10seq=tcaat
YPK_3813	YPK_3813	fumarate reductase flavOPeronrotein subunit part of four member fumarate reductase enzyme complex FrdABCD which catalyzes the reduction of fumarate to succinate during anaerobic respiration; FrdAB are the catalytic subcomplex consisting of a flavOPeronrotein subunit and an iron-sulfur subunit, respecti	4204175	4205998	+	OPeron	4203675	4204175	4204022	1.96	rpoE	promoter=rpoE;box35pos=317;box35seq=taatat;box10pos=336;box10seq=gcaga
YPK_3813	YPK_3813	fumarate reductase flavOPeronrotein subunit part of four member fumarate reductase enzyme complex FrdABCD which catalyzes the reduction of fumarate to succinate during anaerobic respiration; FrdAB are the catalytic subcomplex consisting of a flavOPeronrotein subunit and an iron-sulfur subunit, respecti	4204175	4205998	+	OPeron	4203675	4204175	4204044	1.95	rpoS	promoter=rpoS;box35pos=334;box35seq=ccgcag;box10pos=356;box10seq=aataat
YPK_3813	YPK_3813	fumarate reductase flavOPeronrotein subunit part of four member fumarate reductase enzyme complex FrdABCD which catalyzes the reduction of fumarate to succinate during anaerobic respiration; FrdAB are the catalytic subcomplex consisting of a flavOPeronrotein subunit and an iron-sulfur subunit, respecti	4204175	4205998	+	OPeron	4203675	4204175	4204064	1.96	rpoD	promoter=rpoD;box35pos=349;box35seq=ttagcg;box10pos=377;box10seq=taaaga
YPK_3822	groEL	chaperonin GroEL 60 kDa chaperone family; promotes refolding of misfolded polypeptides especially under stressful conditions; forms two stacked rings of heptamers to form a barrel-shaped 14mer; ends can be capped by GroES; misfolded proteins enter the barrel where they ar	4211358	4213004	-	OPeron	4213344	4213844	4214101	1.98	rpoE	promoter=rpoE;box35pos=211;box35seq=aaattt;box10pos=232;box10seq=gcaat
YPK_3822	groEL	chaperonin GroEL 60 kDa chaperone family; promotes refolding of misfolded polypeptides especially under stressful conditions; forms two stacked rings of heptamers to form a barrel-shaped 14mer; ends can be capped by GroES; misfolded proteins enter the barrel where they ar	4211358	4213004	-	OPeron	4213344	4213844	4214022	1.95	rpoS	promoter=rpoS;box35pos=285;box35seq=tagaac;box10pos=309;box10seq=catttt
YPK_3822	groEL	chaperonin GroEL 60 kDa chaperone family; promotes refolding of misfolded polypeptides especially under stressful conditions; forms two stacked rings of heptamers to form a barrel-shaped 14mer; ends can be capped by GroES; misfolded proteins enter the barrel where they ar	4211358	4213004	-	OPeron	4213344	4213844	4214086	1.96	rpoD	promoter=rpoD;box35pos=221;box35seq=ttaata;box10pos=245;box10seq=taccct
YPK_3823	groES	co-chaperonin GroES 10 kDa chaperonin; Cpn10; GroES; forms homoheptameric ring; binds to one or both ends of the GroEL double barrel in the presence of adenine nucleotides capping it; folding of unfolded substrates initiates in a GroEL-substrate bound and capped by GroES; re	4213051	4213344	-	TSS	4213417	4213917	4214213	1.98	rpoE	promoter=rpoE;box35pos=168;box35seq=aaatta;box10pos=193;box10seq=tcttt
YPK_3823	groES	co-chaperonin GroES 10 kDa chaperonin; Cpn10; GroES; forms homoheptameric ring; binds to one or both ends of the GroEL double barrel in the presence of adenine nucleotides capping it; folding of unfolded substrates initiates in a GroEL-substrate bound and capped by GroES; re	4213051	4213344	-	TSS	4213417	4213917	4214168	1.95	rpoS	promoter=rpoS;box35pos=212;box35seq=tagaac;box10pos=236;box10seq=catttt
YPK_3823	groES	co-chaperonin GroES 10 kDa chaperonin; Cpn10; GroES; forms homoheptameric ring; binds to one or both ends of the GroEL double barrel in the presence of adenine nucleotides capping it; folding of unfolded substrates initiates in a GroEL-substrate bound and capped by GroES; re	4213051	4213344	-	TSS	4213417	4213917	4214208	1.96	rpoD	promoter=rpoD;box35pos=171;box35seq=ttaccc;box10pos=197;box10seq=taaaac
YPK_3839	YPK_3839	hypothetical protein KEGG: ypm:YP_0490 hypothetical protein	4230093	4230359	-	SGene	4230359	4230859	4231114	1.92	rpoS	promoter=rpoS;box35pos=207;box35seq=gtgccg;box10pos=232;box10seq=taaaca
YPK_3839	YPK_3839	hypothetical protein KEGG: ypm:YP_0490 hypothetical protein	4230093	4230359	-	SGene	4230359	4230859	4231116	1.91	rpoD	promoter=rpoD;box35pos=207;box35seq=gtgccg;box10pos=232;box10seq=taaaca
YPK_3850	YPK_3850	single-stranded DNA-binding protein binds to single stranded DNA and PriA helcase facilitate replication restart	4239275	4239823	-	SGene	4239823	4240323	4240536	1.95	rpoE	promoter=rpoE;box35pos=257;box35seq=gaaaag;box10pos=276;box10seq=tcaaa
YPK_3850	YPK_3850	single-stranded DNA-binding protein binds to single stranded DNA and PriA helcase facilitate replication restart	4239275	4239823	-	SGene	4239823	4240323	4240564	1.91	rpoS	promoter=rpoS;box35pos=222;box35seq=taccta;box10pos=246;box10seq=tatgtt
YPK_3850	YPK_3850	single-stranded DNA-binding protein binds to single stranded DNA and PriA helcase facilitate replication restart	4239275	4239823	-	SGene	4239823	4240323	4240478	1.96	rpoD	promoter=rpoD;box35pos=310;box35seq=gagcaa;box10pos=333;box10seq=tatttt
YPK_3856	YPK_3856	quinone oxidoreductase PFAM: Alcohol dehydrogenase zinc-binding domain protein; Alcohol dehydrogenase GroES domain protein~KEGG: yps:YPTB0374 quinone oxidoreductase	4248397	4249380	+	SGene	4247897	4248397	4248163	1.97	rpoE	promoter=rpoE;box35pos=233;box35seq=aaaata;box10pos=255;box10seq=gcgat
YPK_3856	YPK_3856	quinone oxidoreductase PFAM: Alcohol dehydrogenase zinc-binding domain protein; Alcohol dehydrogenase GroES domain protein~KEGG: yps:YPTB0374 quinone oxidoreductase	4248397	4249380	+	SGene	4247897	4248397	4248213	1.92	rpoS	promoter=rpoS;box35pos=282;box35seq=tagcca;box10pos=303;box10seq=catatt
YPK_3856	YPK_3856	quinone oxidoreductase PFAM: Alcohol dehydrogenase zinc-binding domain protein; Alcohol dehydrogenase GroES domain protein~KEGG: yps:YPTB0374 quinone oxidoreductase	4248397	4249380	+	SGene	4247897	4248397	4248323	1.96	rpoD	promoter=rpoD;box35pos=393;box35seq=gtggcc;box10pos=414;box10seq=taagct
YPK_3882	YPK_3882	hypothetical protein KEGG: ypi:YpsIP31758_3794 hypothetical protein	4282619	4283578	+	OPeron	4278033	4278533	4278402	1.97	rpoE	promoter=rpoE;box35pos=337;box35seq=gaacat;box10pos=358;box10seq=acaat
YPK_3882	YPK_3882	hypothetical protein KEGG: ypi:YpsIP31758_3794 hypothetical protein	4282619	4283578	+	OPeron	4278033	4278533	4278454	1.96	rpoS	promoter=rpoS;box35pos=385;box35seq=tttaaa;box10pos=408;box10seq=taagat
YPK_3882	YPK_3882	hypothetical protein KEGG: ypi:YpsIP31758_3794 hypothetical protein	4282619	4283578	+	OPeron	4278033	4278533	4278398	1.97	rpoD	promoter=rpoD;box35pos=330;box35seq=ttgtaa;box10pos=353;box10seq=tataaa
YPK_3884	YPK_3884	methylenetetrahydrofolate reductase PFAM: methylenetetrahydrofolate reductase~KEGG: ypi:YpsIP31758_3796 methylenetetrahydrofolate reductase	4284778	4285578	+	SGene	4284278	4284778	4284668	1.98	rpoE	promoter=rpoE;box35pos=359;box35seq=gatatt;box10pos=379;box10seq=tccta
YPK_3884	YPK_3884	methylenetetrahydrofolate reductase PFAM: methylenetetrahydrofolate reductase~KEGG: ypi:YpsIP31758_3796 methylenetetrahydrofolate reductase	4284778	4285578	+	SGene	4284278	4284778	4284727	1.96	rpoS	promoter=rpoS;box35pos=414;box35seq=ttgcat;box10pos=438;box10seq=tattta
YPK_3884	YPK_3884	methylenetetrahydrofolate reductase PFAM: methylenetetrahydrofolate reductase~KEGG: ypi:YpsIP31758_3796 methylenetetrahydrofolate reductase	4284778	4285578	+	SGene	4284278	4284778	4284493	1.97	rpoD	promoter=rpoD;box35pos=182;box35seq=tttaat;box10pos=203;box10seq=tacaat
YPK_3886	YPK_3886	hypothetical protein PFAM: protein of unknown function DUF1008~KEGG: yps:YPTB0343 hypothetical protein	4287229	4287792	+	OPeron	4285419	4285919	4285869	1.96	rpoE	promoter=rpoE;box35pos=416;box35seq=acaggt;box10pos=439;box10seq=gctat
YPK_3886	YPK_3886	hypothetical protein PFAM: protein of unknown function DUF1008~KEGG: yps:YPTB0343 hypothetical protein	4287229	4287792	+	OPeron	4285419	4285919	4285745	1.95	rpoS	promoter=rpoS;box35pos=292;box35seq=tttctt;box10pos=313;box10seq=taccct
YPK_3886	YPK_3886	hypothetical protein PFAM: protein of unknown function DUF1008~KEGG: yps:YPTB0343 hypothetical protein	4287229	4287792	+	OPeron	4285419	4285919	4285655	1.95	rpoD	promoter=rpoD;box35pos=196;box35seq=cagaac;box10pos=223;box10seq=gatatt
YPK_3889	YPK_3889	TonB-dependent heme/hemoglobin receptor family protein TIGRFAM: TonB-dependent hemoglobin/transferrin/lactoferrin family receptor; TonB-dependent heme/hemoglobin receptor family protein~PFAM: TonB-dependent receptor; TonB-dependent receptor plug~KEGG: ypi:YpsIP31758_3801 TonB-dependent hemin receptor HmuR	4288884	4290914	+	SGene	4288384	4288884	4288602	1.95	rpoS	promoter=rpoS;box35pos=180;box35seq=tggata;box10pos=205;box10seq=aatgtt
YPK_3889	YPK_3889	TonB-dependent heme/hemoglobin receptor family protein TIGRFAM: TonB-dependent hemoglobin/transferrin/lactoferrin family receptor; TonB-dependent heme/hemoglobin receptor family protein~PFAM: TonB-dependent receptor; TonB-dependent receptor plug~KEGG: ypi:YpsIP31758_3801 TonB-dependent hemin receptor HmuR	4288884	4290914	+	SGene	4288384	4288884	4288759	1.92	rpoD	promoter=rpoD;box35pos=335;box35seq=cagacc;box10pos=363;box10seq=caaaat
YPK_3890	YPK_3890	hemin-degrading family protein PFAM: Haemin-degrading family protein~KEGG: yps:YPTB0339 possible hemin degradation/transport protein HmuS	4291033	4292070	+	OPeron	4290533	4291033	4290917	1.93	rpoE	promoter=rpoE;box35pos=355;box35seq=gaaatt;box10pos=373;box10seq=tcagt
YPK_3890	YPK_3890	hemin-degrading family protein PFAM: Haemin-degrading family protein~KEGG: yps:YPTB0339 possible hemin degradation/transport protein HmuS	4291033	4292070	+	OPeron	4290533	4291033	4290971	1.93	rpoS	promoter=rpoS;box35pos=402;box35seq=ctgaaa;box10pos=425;box10seq=catttt
YPK_3890	YPK_3890	hemin-degrading family protein PFAM: Haemin-degrading family protein~KEGG: yps:YPTB0339 possible hemin degradation/transport protein HmuS	4291033	4292070	+	OPeron	4290533	4291033	4290970	1.94	rpoD	promoter=rpoD;box35pos=402;box35seq=ctgaaa;box10pos=425;box10seq=catttt
YPK_3896	YPK_3896	LysR family transcriptional regulator PFAM: regulatory protein LysR; LysR substrate-binding~KEGG: ypi:YpsIP31758_3808 substrate-binding transcriptional regulator, LysR family	4297524	4298507	+	SGene	4297024	4297524	4297458	1.98	rpoE	promoter=rpoE;box35pos=400;box35seq=aaaata;box10pos=423;box10seq=acaaa
YPK_3896	YPK_3896	LysR family transcriptional regulator PFAM: regulatory protein LysR; LysR substrate-binding~KEGG: ypi:YpsIP31758_3808 substrate-binding transcriptional regulator, LysR family	4297524	4298507	+	SGene	4297024	4297524	4297470	1.95	rpoS	promoter=rpoS;box35pos=412;box35seq=tttgac;box10pos=433;box10seq=aatatt
YPK_3896	YPK_3896	LysR family transcriptional regulator PFAM: regulatory protein LysR; LysR substrate-binding~KEGG: ypi:YpsIP31758_3808 substrate-binding transcriptional regulator, LysR family	4297524	4298507	+	SGene	4297024	4297524	4297407	1.97	rpoD	promoter=rpoD;box35pos=347;box35seq=tttatt;box10pos=369;box10seq=taagtt
YPK_3898	YPK_3898	hypothetical protein PFAM: protein of unknown function DUF395 YeeE/YedE~KEGG: ypm:YP_0429 putative integral membrane protein	4298851	4300065	-	OPeron	4300065	4300565	4300728	1.96	rpoE	promoter=rpoE;box35pos=302;box35seq=gatatt;box10pos=326;box10seq=tcaaa
YPK_3898	YPK_3898	hypothetical protein PFAM: protein of unknown function DUF395 YeeE/YedE~KEGG: ypm:YP_0429 putative integral membrane protein	4298851	4300065	-	OPeron	4300065	4300565	4300701	1.95	rpoS	promoter=rpoS;box35pos=325;box35seq=ttcaaa;box10pos=351;box10seq=tatcat
YPK_3898	YPK_3898	hypothetical protein PFAM: protein of unknown function DUF395 YeeE/YedE~KEGG: ypm:YP_0429 putative integral membrane protein	4298851	4300065	-	OPeron	4300065	4300565	4300731	1.98	rpoD	promoter=rpoD;box35pos=292;box35seq=aataaa;box10pos=320;box10seq=tattat
YPK_3908	YPK_3908	HrpE/YscL family type III secretion apparatus protein TIGRFAM: type III secretion apparatus protein, HrpE/YscL family~KEGG: ypi:YpsIP31758_3820 type III secretion apparatus protein, HrpE/YscL family	4308450	4309097	-	OPeron	4309687	4310187	4310451	1.93	rpoS	promoter=rpoS;box35pos=195;box35seq=tttacc;box10pos=223;box10seq=tacaaa
YPK_3908	YPK_3908	HrpE/YscL family type III secretion apparatus protein TIGRFAM: type III secretion apparatus protein, HrpE/YscL family~KEGG: ypi:YpsIP31758_3820 type III secretion apparatus protein, HrpE/YscL family	4308450	4309097	-	OPeron	4309687	4310187	4310440	1.96	rpoD	promoter=rpoD;box35pos=207;box35seq=gagaat;box10pos=235;box10seq=tacaat
YPK_3932	YPK_3932	proline dipeptidase catalyzes the hydrolysis of dipeptides with a proline at the C-terminal; also catalyzes the low efficiency hydrolysis of organOPeronhosphate di- and tri-esters	4336762	4338093	-	TSS	4338122	4338622	4338912	1.98	rpoE	promoter=rpoE;box35pos=174;box35seq=tacctt;box10pos=199;box10seq=gcaaa
YPK_3932	YPK_3932	proline dipeptidase catalyzes the hydrolysis of dipeptides with a proline at the C-terminal; also catalyzes the low efficiency hydrolysis of organOPeronhosphate di- and tri-esters	4336762	4338093	-	TSS	4338122	4338622	4338903	1.95	rpoS	promoter=rpoS;box35pos=181;box35seq=ttgatt;box10pos=206;box10seq=aacaat
YPK_3932	YPK_3932	proline dipeptidase catalyzes the hydrolysis of dipeptides with a proline at the C-terminal; also catalyzes the low efficiency hydrolysis of organOPeronhosphate di- and tri-esters	4336762	4338093	-	TSS	4338122	4338622	4338877	1.96	rpoD	promoter=rpoD;box35pos=212;box35seq=ctctca;box10pos=233;box10seq=caaaat
YPK_3942	YPK_3942	twin arginine-targeting protein translocase TIGRFAM: twin-arginine translocation protein, TatA/E family subunit~PFAM: sec-independent translocation protein mttA/Hcf106~KEGG: ypi:YpsIP31758_0274 twin arginine-targeting protein translocase TatA	4348362	4348628	-	TSS	4348665	4349165	4349279	1.92	rpoS	promoter=rpoS;box35pos=351;box35seq=tttatg;box10pos=373;box10seq=taaacc
YPK_3942	YPK_3942	twin arginine-targeting protein translocase TIGRFAM: twin-arginine translocation protein, TatA/E family subunit~PFAM: sec-independent translocation protein mttA/Hcf106~KEGG: ypi:YpsIP31758_0274 twin arginine-targeting protein translocase TatA	4348362	4348628	-	TSS	4348665	4349165	4349335	1.92	rpoD	promoter=rpoD;box35pos=297;box35seq=ttgttg;box10pos=318;box10seq=tatagt
YPK_3962	YPK_3962	glycerol-3-phosphate transporter periplasmic binding protein with UgpACE is involved in the uptake of glycerol-3-phosphate	4370998	4372317	-	SGene	4372317	4372817	4373000	1.98	rpoE	promoter=rpoE;box35pos=283;box35seq=aaagga;box10pos=306;box10seq=actaa
YPK_3962	YPK_3962	glycerol-3-phosphate transporter periplasmic binding protein with UgpACE is involved in the uptake of glycerol-3-phosphate	4370998	4372317	-	SGene	4372317	4372817	4372927	1.96	rpoS	promoter=rpoS;box35pos=350;box35seq=ttaaaa;box10pos=373;box10seq=tataat
YPK_3962	YPK_3962	glycerol-3-phosphate transporter periplasmic binding protein with UgpACE is involved in the uptake of glycerol-3-phosphate	4370998	4372317	-	SGene	4372317	4372817	4373051	1.98	rpoD	promoter=rpoD;box35pos=227;box35seq=ttacca;box10pos=252;box10seq=taaaaa
YPK_3968	YPK_3968	hypothetical protein KEGG: ypi:YpsIP31758_0250 hypothetical protein	4377954	4379060	+	SGene	4377454	4377954	4377844	1.97	rpoE	promoter=rpoE;box35pos=356;box35seq=tcacgg;box10pos=379;box10seq=tcgaa
YPK_3968	YPK_3968	hypothetical protein KEGG: ypi:YpsIP31758_0250 hypothetical protein	4377954	4379060	+	SGene	4377454	4377954	4377763	1.95	rpoD	promoter=rpoD;box35pos=273;box35seq=caggca;box10pos=297;box10seq=gattat
YPK_3976	YPK_3976	RNA polymerase factor sigma-32 binds with the catalytic core of RNA polymerase to produce the holoenzyme; this sigma factor is responsible for the expression of heat shock promoters	4385900	4386757	-	TSS	4386800	4387300	4387591	1.96	rpoE	promoter=rpoE;box35pos=173;box35seq=aaaccg;box10pos=198;box10seq=tcaat
YPK_3976	YPK_3976	RNA polymerase factor sigma-32 binds with the catalytic core of RNA polymerase to produce the holoenzyme; this sigma factor is responsible for the expression of heat shock promoters	4385900	4386757	-	TSS	4386800	4387300	4387534	1.9	rpoD	promoter=rpoD;box35pos=232;box35seq=tttcag;box10pos=254;box10seq=tataac
YPK_3981	YPK_3981	hypothetical protein PFAM: protein of unknown function DUF1145~KEGG: ypa:YPA_0206 hypothetical protein	4391190	4391462	+	OPeron	4390038	4390538	4390317	1.92	rpoS	promoter=rpoS;box35pos=240;box35seq=gttaaa;box10pos=266;box10seq=tacaat
YPK_3981	YPK_3981	hypothetical protein PFAM: protein of unknown function DUF1145~KEGG: ypa:YPA_0206 hypothetical protein	4391190	4391462	+	OPeron	4390038	4390538	4390324	1.93	rpoD	promoter=rpoD;box35pos=252;box35seq=cttata;box10pos=274;box10seq=tagcct
YPK_3993	YPK_3993	hypothetical protein KEGG: ypa:YPA_0194 hypothetical protein	4404375	4405574	-	SGene	4405574	4406074	4406277	1.98	rpoE	promoter=rpoE;box35pos=266;box35seq=actctt;box10pos=287;box10seq=tctta
YPK_3993	YPK_3993	hypothetical protein KEGG: ypa:YPA_0194 hypothetical protein	4404375	4405574	-	SGene	4405574	4406074	4406307	1.95	rpoS	promoter=rpoS;box35pos=230;box35seq=tccaca;box10pos=254;box10seq=aacgtt
YPK_3993	YPK_3993	hypothetical protein KEGG: ypa:YPA_0194 hypothetical protein	4404375	4405574	-	SGene	4405574	4406074	4406325	1.94	rpoD	promoter=rpoD;box35pos=210;box35seq=gtgacc;box10pos=237;box10seq=catcat
YPK_4004	YPK_4004	hypothetical protein KEGG: ypa:YPA_0184 hypothetical protein	4415441	4416271	-	OPeron	4417529	4418029	4418135	1.97	rpoE	promoter=rpoE;box35pos=362;box35seq=aaactc;box10pos=383;box10seq=tcatt
YPK_4004	YPK_4004	hypothetical protein KEGG: ypa:YPA_0184 hypothetical protein	4415441	4416271	-	OPeron	4417529	4418029	4418084	1.94	rpoS	promoter=rpoS;box35pos=410;box35seq=tataaa;box10pos=432;box10seq=aatact
YPK_4004	YPK_4004	hypothetical protein KEGG: ypa:YPA_0184 hypothetical protein	4415441	4416271	-	OPeron	4417529	4418029	4418107	1.96	rpoD	promoter=rpoD;box35pos=382;box35seq=ttcatt;box10pos=410;box10seq=tataaa
YPK_4029	YPK_4029	dTDP-glucose 4,6-dehydratase TIGRFAM: dTDP-glucose 4,6-dehydratase~PFAM: NAD-dependent epimerase/dehydratase; short-chain dehydrogenase/reductase SDR; 3-beta hydroxysteroid dehydrogenase/isomerase; polysaccharide biosynthesis protein CapD; dTDP-4-dehydrorhamnose reductase; Male steri	4443326	4444393	-	OPeron	4446779	4447279	4447549	1.96	rpoE	promoter=rpoE;box35pos=197;box35seq=caacta;box10pos=219;box10seq=actga
YPK_4029	YPK_4029	dTDP-glucose 4,6-dehydratase TIGRFAM: dTDP-glucose 4,6-dehydratase~PFAM: NAD-dependent epimerase/dehydratase; short-chain dehydrogenase/reductase SDR; 3-beta hydroxysteroid dehydrogenase/isomerase; polysaccharide biosynthesis protein CapD; dTDP-4-dehydrorhamnose reductase; Male steri	4443326	4444393	-	OPeron	4446779	4447279	4447489	1.93	rpoS	promoter=rpoS;box35pos=254;box35seq=ctgaca;box10pos=277;box10seq=catagt
YPK_4029	YPK_4029	dTDP-glucose 4,6-dehydratase TIGRFAM: dTDP-glucose 4,6-dehydratase~PFAM: NAD-dependent epimerase/dehydratase; short-chain dehydrogenase/reductase SDR; 3-beta hydroxysteroid dehydrogenase/isomerase; polysaccharide biosynthesis protein CapD; dTDP-4-dehydrorhamnose reductase; Male steri	4443326	4444393	-	OPeron	4446779	4447279	4447490	1.93	rpoD	promoter=rpoD;box35pos=254;box35seq=ctgaca;box10pos=277;box10seq=catagt
YPK_4037	YPK_4037	guanosine pentaphosphate phosphohydrolase catalyzes the conversion of guanosine 5'-triphosphate,3'-diphosphate (pppGpp) to guanosine 5'-diphosphate,3'-diphosphate (ppGpp); pppGpp and ppGpp control the stringent response during amino acid starvation	4453331	4454827	+	OPeron	4451541	4452041	4451988	1.9	rpoD	promoter=rpoD;box35pos=413;box35seq=ttggtg;box10pos=435;box10seq=taggat
YPK_4039	YPK_4039	hypothetical protein KEGG: ypi:YpsIP31758_0174 hypothetical protein	4457033	4457200	+	OPeron	4456533	4457033	4456889	1.94	rpoS	promoter=rpoS;box35pos=318;box35seq=gtgaag;box10pos=343;box10seq=taggct
YPK_4039	YPK_4039	hypothetical protein KEGG: ypi:YpsIP31758_0174 hypothetical protein	4457033	4457200	+	OPeron	4456533	4457033	4456743	1.91	rpoD	promoter=rpoD;box35pos=175;box35seq=tcgact;box10pos=198;box10seq=tactct
YPK_4040	YPK_4040	PpiC-type peptidyl-prolyl cis-trans isomerase PFAM: PpiC-type peptidyl-prolyl cis-trans isomerase~KEGG: ypm:YP_3172 peptidyl-prolyl cis-trans isomerase C	4457205	4457501	+	TSS	4456646	4457146	4456889	1.94	rpoS	promoter=rpoS;box35pos=205;box35seq=gtgaag;box10pos=230;box10seq=taggct
YPK_4041	YPK_4041	glutamine cyclotransferase PFAM: glutamine cyclotransferase~KEGG: ypi:YpsIP31758_0172 glutamine cyclotransferase	4457740	4458531	+	SGene	4457240	4457740	4457677	1.98	rpoE	promoter=rpoE;box35pos=401;box35seq=acagtt;box10pos=426;box10seq=gcaat
YPK_4041	YPK_4041	glutamine cyclotransferase PFAM: glutamine cyclotransferase~KEGG: ypi:YpsIP31758_0172 glutamine cyclotransferase	4457740	4458531	+	SGene	4457240	4457740	4457683	1.96	rpoS	promoter=rpoS;box35pos=406;box35seq=tagcca;box10pos=430;box10seq=taaaat
YPK_4041	YPK_4041	glutamine cyclotransferase PFAM: glutamine cyclotransferase~KEGG: ypi:YpsIP31758_0172 glutamine cyclotransferase	4457740	4458531	+	SGene	4457240	4457740	4457630	1.97	rpoD	promoter=rpoD;box35pos=355;box35seq=tcgaat;box10pos=378;box10seq=taaaat
YPK_4042	YPK_4042	fimbrial protein PFAM: Fimbrial protein~KEGG: ypa:YPA_0142 putative fimbrial protein	4459323	4459853	+	OPeron	4458823	4459323	4459098	1.98	rpoE	promoter=rpoE;box35pos=239;box35seq=caatat;box10pos=264;box10seq=tcggt
YPK_4042	YPK_4042	fimbrial protein PFAM: Fimbrial protein~KEGG: ypa:YPA_0142 putative fimbrial protein	4459323	4459853	+	OPeron	4458823	4459323	4459056	1.96	rpoS	promoter=rpoS;box35pos=194;box35seq=cttaat;box10pos=220;box10seq=tacaat
YPK_4042	YPK_4042	fimbrial protein PFAM: Fimbrial protein~KEGG: ypa:YPA_0142 putative fimbrial protein	4459323	4459853	+	OPeron	4458823	4459323	4459042	1.97	rpoD	promoter=rpoD;box35pos=183;box35seq=tttaac;box10pos=206;box10seq=taaaaa
YPK_4060	ilvM	acetolactate synthase 2 regulatory subunit KEGG: ypi:YpsIP31758_0155 acetolactate synthase isozyme II small subunit	4478882	4479139	-	OPeron	4480782	4481282	4481398	1.98	rpoE	promoter=rpoE;box35pos=350;box35seq=aaatgc;box10pos=373;box10seq=tcaat
YPK_4060	ilvM	acetolactate synthase 2 regulatory subunit KEGG: ypi:YpsIP31758_0155 acetolactate synthase isozyme II small subunit	4478882	4479139	-	OPeron	4480782	4481282	4481411	1.95	rpoS	promoter=rpoS;box35pos=332;box35seq=tttgtg;box10pos=358;box10seq=taaaca
YPK_4060	ilvM	acetolactate synthase 2 regulatory subunit KEGG: ypi:YpsIP31758_0155 acetolactate synthase isozyme II small subunit	4478882	4479139	-	OPeron	4480782	4481282	4481448	1.97	rpoD	promoter=rpoD;box35pos=298;box35seq=ttggtt;box10pos=321;box10seq=taactt
YPK_4063	YPK_4063	hypothetical protein PFAM: protein of unknown function DUF413~KEGG: ypi:YpsIP31758_0152 hypothetical protein	4483185	4483523	-	TSS	4483562	4484062	4484310	1.91	rpoS	promoter=rpoS;box35pos=211;box35seq=gtgcaa;box10pos=239;box10seq=taatat
YPK_4063	YPK_4063	hypothetical protein PFAM: protein of unknown function DUF413~KEGG: ypi:YpsIP31758_0152 hypothetical protein	4483185	4483523	-	TSS	4483562	4484062	4484312	1.92	rpoD	promoter=rpoD;box35pos=211;box35seq=gtgcaa;box10pos=239;box10seq=taatat
YPK_4107	YPK_4107	hypothetical protein KEGG: ypi:YpsIP31758_0109 hypothetical protein	4539058	4539642	-	TSS	4539861	4540361	4540522	1.97	rpoE	promoter=rpoE;box35pos=304;box35seq=gaataa;box10pos=328;box10seq=acaaa
YPK_4107	YPK_4107	hypothetical protein KEGG: ypi:YpsIP31758_0109 hypothetical protein	4539058	4539642	-	TSS	4539861	4540361	4540567	1.96	rpoS	promoter=rpoS;box35pos=257;box35seq=ctgcat;box10pos=280;box10seq=tactta
YPK_4107	YPK_4107	hypothetical protein KEGG: ypi:YpsIP31758_0109 hypothetical protein	4539058	4539642	-	TSS	4539861	4540361	4540603	1.96	rpoD	promoter=rpoD;box35pos=220;box35seq=tcgata;box10pos=247;box10seq=taggat
YPK_4109	YPK_4109	secretion protein HlyD family protein PFAM: secretion protein HlyD family protein~KEGG: ypi:YpsIP31758_0106 auxiliary transport protein, membrane fusion protein (MFP) family	4540724	4542016	+	OPeron	4540224	4540724	4540622	1.98	rpoE	promoter=rpoE;box35pos=366;box35seq=aaaata;box10pos=387;box10seq=gcaat
YPK_4109	YPK_4109	secretion protein HlyD family protein PFAM: secretion protein HlyD family protein~KEGG: ypi:YpsIP31758_0106 auxiliary transport protein, membrane fusion protein (MFP) family	4540724	4542016	+	OPeron	4540224	4540724	4540654	1.95	rpoS	promoter=rpoS;box35pos=391;box35seq=ttcgta;box10pos=417;box10seq=tagagt
YPK_4109	YPK_4109	secretion protein HlyD family protein PFAM: secretion protein HlyD family protein~KEGG: ypi:YpsIP31758_0106 auxiliary transport protein, membrane fusion protein (MFP) family	4540724	4542016	+	OPeron	4540224	4540724	4540617	1.97	rpoD	promoter=rpoD;box35pos=358;box35seq=gtaata;box10pos=381;box10seq=caaact
YPK_4111	YPK_4111	hypothetical protein PFAM: protein of unknown function DUF904~KEGG: ypi:YpsIP31758_0103 hypothetical protein	4544464	4544703	-	TSS	4544806	4545306	4545367	1.98	rpoE	promoter=rpoE;box35pos=406;box35seq=acattt;box10pos=429;box10seq=tccga
YPK_4111	YPK_4111	hypothetical protein PFAM: protein of unknown function DUF904~KEGG: ypi:YpsIP31758_0103 hypothetical protein	4544464	4544703	-	TSS	4544806	4545306	4545358	1.96	rpoS	promoter=rpoS;box35pos=411;box35seq=ttcaca;box10pos=435;box10seq=cacact
YPK_4111	YPK_4111	hypothetical protein PFAM: protein of unknown function DUF904~KEGG: ypi:YpsIP31758_0103 hypothetical protein	4544464	4544703	-	TSS	4544806	4545306	4545390	1.96	rpoD	promoter=rpoD;box35pos=377;box35seq=ccgccc;box10pos=404;box10seq=taacat
YPK_4118	tpiA	triosephosphate isomerase Reversibly isomerizes the ketone sugar dihydroxyacetone phosphate to the aldehyde sugar glyceraldehyde-3-phosphate	4551843	4552610	+	TSS	4551278	4551778	4551502	1.91	rpoD	promoter=rpoD;box35pos=187;box35seq=ttaaag;box10pos=212;box10seq=taaact
YPK_4123	YPK_4123	extracellular solute-binding protein PFAM: extracellular solute-binding protein family 1~KEGG: yps:YPTB0076 possible ABC transporter, periplasmic molybdate binding protein	4557257	4558033	+	SGene	4556757	4557257	4557200	1.98	rpoE	promoter=rpoE;box35pos=411;box35seq=taattt;box10pos=432;box10seq=actga
YPK_4123	YPK_4123	extracellular solute-binding protein PFAM: extracellular solute-binding protein family 1~KEGG: yps:YPTB0076 possible ABC transporter, periplasmic molybdate binding protein	4557257	4558033	+	SGene	4556757	4557257	4557179	1.96	rpoS	promoter=rpoS;box35pos=386;box35seq=ttgctg;box10pos=411;box10seq=taattt
YPK_4123	YPK_4123	extracellular solute-binding protein PFAM: extracellular solute-binding protein family 1~KEGG: yps:YPTB0076 possible ABC transporter, periplasmic molybdate binding protein	4557257	4558033	+	SGene	4556757	4557257	4557180	1.97	rpoD	promoter=rpoD;box35pos=386;box35seq=ttgctg;box10pos=411;box10seq=taattt
YPK_4149	YPK_4149	3-deoxy-D-manno-octulosonic-acid transferase catalyzes the transfer of 2-keto-3-deoxy-D-manno-octulosonic acid to lipid A	4582268	4583587	+	TSS	4581785	4582285	4582188	1.98	rpoE	promoter=rpoE;box35pos=370;box35seq=taaata;box10pos=392;box10seq=tcaga
YPK_4149	YPK_4149	3-deoxy-D-manno-octulosonic-acid transferase catalyzes the transfer of 2-keto-3-deoxy-D-manno-octulosonic acid to lipid A	4582268	4583587	+	TSS	4581785	4582285	4582206	1.95	rpoS	promoter=rpoS;box35pos=384;box35seq=tttatc;box10pos=408;box10seq=tattct
YPK_4149	YPK_4149	3-deoxy-D-manno-octulosonic-acid transferase catalyzes the transfer of 2-keto-3-deoxy-D-manno-octulosonic acid to lipid A	4582268	4583587	+	TSS	4581785	4582285	4582076	1.97	rpoD	promoter=rpoD;box35pos=257;box35seq=tttact;box10pos=279;box10seq=cataat
YPK_4152	YPK_4152	formamidOPeronyrimidine-DNA glycosylase Involved in base excision repair of DNA damaged by oxidation or by mutagenic agents. Acts as DNA glycosylase that recognizes and removes damaged bases	4584852	4585661	-	SGene	4585661	4586161	4586399	1.94	rpoS	promoter=rpoS;box35pos=222;box35seq=cttaat;box10pos=249;box10seq=catgat
YPK_4152	YPK_4152	formamidOPeronyrimidine-DNA glycosylase Involved in base excision repair of DNA damaged by oxidation or by mutagenic agents. Acts as DNA glycosylase that recognizes and removes damaged bases	4584852	4585661	-	SGene	4585661	4586161	4586330	1.96	rpoD	promoter=rpoD;box35pos=291;box35seq=tcggcc;box10pos=319;box10seq=tatcaa
YPK_4162	YPK_4162	integrase family protein PFAM: integrase family protein~KEGG: ypi:YpsIP31758_0054 site-specific recombinase, phage integrase family	4592498	4593766	+	TSS	4591921	4592421	4592358	1.93	rpoD	promoter=rpoD;box35pos=403;box35seq=ttgctg;box10pos=426;box10seq=gaaaat
YPK_4165	YPK_4165	hypothetical protein KEGG: ypi:YpsIP31758_0051 hypothetical protein	4594966	4595385	+	OPeron	4594131	4594631	4594523	1.94	rpoS	promoter=rpoS;box35pos=355;box35seq=ttgtcg;box10pos=379;box10seq=tatcgt
YPK_4165	YPK_4165	hypothetical protein KEGG: ypi:YpsIP31758_0051 hypothetical protein	4594966	4595385	+	OPeron	4594131	4594631	4594435	1.96	rpoD	promoter=rpoD;box35pos=264;box35seq=caacaa;box10pos=292;box10seq=taattt
YPK_4181	YPK_4181	sodium/glutamate symporter PFAM: sodium/glutamate symporter~KEGG: ypm:YP_0036 sodium/glutamate symport carrier protein	4610943	4612157	-	SGene	4612157	4612657	4612929	1.98	rpoE	promoter=rpoE;box35pos=196;box35seq=gatcat;box10pos=217;box10seq=gccga
YPK_4181	YPK_4181	sodium/glutamate symporter PFAM: sodium/glutamate symporter~KEGG: ypm:YP_0036 sodium/glutamate symport carrier protein	4610943	4612157	-	SGene	4612157	4612657	4612942	1.96	rpoS	promoter=rpoS;box35pos=180;box35seq=ttgctt;box10pos=202;box10seq=taaaat
YPK_4181	YPK_4181	sodium/glutamate symporter PFAM: sodium/glutamate symporter~KEGG: ypm:YP_0036 sodium/glutamate symport carrier protein	4610943	4612157	-	SGene	4612157	4612657	4612949	1.96	rpoD	promoter=rpoD;box35pos=170;box35seq=gcgcaa;box10pos=196;box10seq=gatcat
YPK_4185	YPK_4185	D-tyrosyl-tRNA(Tyr) deacylase hydrolyzes D-tyrosyl-tRNA(Tyr) into D-tyrosine and free tRNA(Tyr); possible defense mechanism against a harmful effect of D-tyrosine	4616879	4617316	-	OPeron	4618894	4619394	4619571	1.96	rpoE	promoter=rpoE;box35pos=294;box35seq=gcccta;box10pos=312;box10seq=gcaaa
YPK_4185	YPK_4185	D-tyrosyl-tRNA(Tyr) deacylase hydrolyzes D-tyrosyl-tRNA(Tyr) into D-tyrosine and free tRNA(Tyr); possible defense mechanism against a harmful effect of D-tyrosine	4616879	4617316	-	OPeron	4618894	4619394	4619677	1.92	rpoS	promoter=rpoS;box35pos=182;box35seq=gtgaac;box10pos=204;box10seq=tatata
YPK_4185	YPK_4185	D-tyrosyl-tRNA(Tyr) deacylase hydrolyzes D-tyrosyl-tRNA(Tyr) into D-tyrosine and free tRNA(Tyr); possible defense mechanism against a harmful effect of D-tyrosine	4616879	4617316	-	OPeron	4618894	4619394	4619657	1.94	rpoD	promoter=rpoD;box35pos=202;box35seq=tttata;box10pos=225;box10seq=gaaatt
YPK_4201	YPK_4201	transposase mutator type PFAM: transposase mutator type~KEGG: yps:YPTB3311 putative transposase	4636325	4637533	-	SGene	4637533	4638033	4638243	1.97	rpoE	promoter=rpoE;box35pos=256;box35seq=tatcta;box10pos=279;box10seq=tctga
YPK_4201	YPK_4201	transposase mutator type PFAM: transposase mutator type~KEGG: yps:YPTB3311 putative transposase	4636325	4637533	-	SGene	4637533	4638033	4638323	1.94	rpoS	promoter=rpoS;box35pos=176;box35seq=ccgctt;box10pos=197;box10seq=tatacc
YPK_4201	YPK_4201	transposase mutator type PFAM: transposase mutator type~KEGG: yps:YPTB3311 putative transposase	4636325	4637533	-	SGene	4637533	4638033	4638093	1.96	rpoD	promoter=rpoD;box35pos=403;box35seq=tatcct;box10pos=427;box10seq=tacaac
YPK_4215	YPK_4215	DNA-binding transcriptional regulator AsnC transcriptional repressor of asnA which codes for aspartate-ammonia ligase	4654158	4654619	+	SGene	4653658	4654158	4654100	1.94	rpoE	promoter=rpoE;box35pos=409;box35seq=tcaata;box10pos=431;box10seq=gccat
YPK_4215	YPK_4215	DNA-binding transcriptional regulator AsnC transcriptional repressor of asnA which codes for aspartate-ammonia ligase	4654158	4654619	+	SGene	4653658	4654158	4654020	1.96	rpoS	promoter=rpoS;box35pos=326;box35seq=tttcat;box10pos=351;box10seq=tatgtt
YPK_4215	YPK_4215	DNA-binding transcriptional regulator AsnC transcriptional repressor of asnA which codes for aspartate-ammonia ligase	4654158	4654619	+	SGene	4653658	4654158	4654098	1.96	rpoD	promoter=rpoD;box35pos=402;box35seq=gttaaa;box10pos=427;box10seq=tatagc
YPK_4222	YPK_4222	F0F1 ATP synthase subunit B Produces ATP from ADP in the presence of a proton gradient across the membrane. Subunit B is part of the membrane proton channel.	4660468	4660938	+	OPeron	4658793	4659293	4659184	1.9	rpoS	promoter=rpoS;box35pos=350;box35seq=tttaaa;box10pos=378;box10seq=taacct
YPK_4222	YPK_4222	F0F1 ATP synthase subunit B Produces ATP from ADP in the presence of a proton gradient across the membrane. Subunit B is part of the membrane proton channel.	4660468	4660938	+	OPeron	4658793	4659293	4659185	1.92	rpoD	promoter=rpoD;box35pos=350;box35seq=tttaaa;box10pos=378;box10seq=taacct
YPK_4225	YPK_4225	F0F1 ATP synthase subunit gamma Produces ATP from ADP in the presence of a proton gradient across the membrane. The gamma chain is a regulatory subunit	4663104	4663967	+	OPeron	4658793	4659293	4659184	1.9	rpoS	promoter=rpoS;box35pos=350;box35seq=tttaaa;box10pos=378;box10seq=taacct
YPK_4225	YPK_4225	F0F1 ATP synthase subunit gamma Produces ATP from ADP in the presence of a proton gradient across the membrane. The gamma chain is a regulatory subunit	4663104	4663967	+	OPeron	4658793	4659293	4659185	1.92	rpoD	promoter=rpoD;box35pos=350;box35seq=tttaaa;box10pos=378;box10seq=taacct
YPK_4226	YPK_4226	F0F1 ATP synthase subunit beta Produces ATP from ADP in the presence of a proton gradient across the membrane. The beta chain is a regulatory subunit	4664123	4665505	+	OPeron	4663623	4664123	4664071	1.9	rpoD	promoter=rpoD;box35pos=409;box35seq=cttata;box10pos=436;box10seq=taaggt
YPK_4228	glmU	bifunctional N-acetylglucosamine-1-phosphate uridyltransferase/glucosamine-1-phosphate acetyltransferase forms a homotrimer; catalyzes the acetylation of glucosamine-1-phosphate and uridylation of N-acetylglucosamine-1-phosphate to produce UDP-GlcNAc; function in cell wall synthesis	4666570	4667940	+	TSS	4666044	4666544	4666382	1.97	rpoE	promoter=rpoE;box35pos=302;box35seq=aaataa;box10pos=327;box10seq=acaga
YPK_4228	glmU	bifunctional N-acetylglucosamine-1-phosphate uridyltransferase/glucosamine-1-phosphate acetyltransferase forms a homotrimer; catalyzes the acetylation of glucosamine-1-phosphate and uridylation of N-acetylglucosamine-1-phosphate to produce UDP-GlcNAc; function in cell wall synthesis	4666570	4667940	+	TSS	4666044	4666544	4666357	1.95	rpoS	promoter=rpoS;box35pos=273;box35seq=ctttcg;box10pos=300;box10seq=taaaat
YPK_4228	glmU	bifunctional N-acetylglucosamine-1-phosphate uridyltransferase/glucosamine-1-phosphate acetyltransferase forms a homotrimer; catalyzes the acetylation of glucosamine-1-phosphate and uridylation of N-acetylglucosamine-1-phosphate to produce UDP-GlcNAc; function in cell wall synthesis	4666570	4667940	+	TSS	4666044	4666544	4666389	1.96	rpoD	promoter=rpoD;box35pos=311;box35seq=gttatt;box10pos=333;box10seq=tacatt
YPK_4236	YPK_4236	hypothetical protein PFAM: protein of unknown function DUF583~KEGG: yps:YPTB3958 hypothetical protein	4675524	4676195	+	SGene	4675024	4675524	4675469	1.98	rpoE	promoter=rpoE;box35pos=411;box35seq=aaaata;box10pos=434;box10seq=tcaga
YPK_4236	YPK_4236	hypothetical protein PFAM: protein of unknown function DUF583~KEGG: yps:YPTB3958 hypothetical protein	4675524	4676195	+	SGene	4675024	4675524	4675465	1.96	rpoS	promoter=rpoS;box35pos=407;box35seq=taggaa;box10pos=428;box10seq=tatttt
YPK_4236	YPK_4236	hypothetical protein PFAM: protein of unknown function DUF583~KEGG: yps:YPTB3958 hypothetical protein	4675524	4676195	+	SGene	4675024	4675524	4675416	1.97	rpoD	promoter=rpoD;box35pos=358;box35seq=tttatt;box10pos=379;box10seq=tattaa
YPK_4239	YPK_4239	polar amino acid ABC transporter inner membrane subunit TIGRFAM: polar amino acid ABC transporter, inner membrane subunit~PFAM: binding-protein-dependent transport systems inner membrane component~KEGG: yps:YPTB3955 ABC amino acid transporter, permease subunit	4678179	4678934	+	OPeron	4676940	4677440	4677359	1.92	rpoS	promoter=rpoS;box35pos=379;box35seq=ttggct;box10pos=406;box10seq=tatgtt
YPK_4239	YPK_4239	polar amino acid ABC transporter inner membrane subunit TIGRFAM: polar amino acid ABC transporter, inner membrane subunit~PFAM: binding-protein-dependent transport systems inner membrane component~KEGG: yps:YPTB3955 ABC amino acid transporter, permease subunit	4678179	4678934	+	OPeron	4676940	4677440	4677159	1.97	rpoD	promoter=rpoD;box35pos=182;box35seq=cagccg;box10pos=207;box10seq=taagct
YPK_4242	YPK_4242	hypothetical protein KEGG: yps:YPTB3952 hypothetical protein	4682003	4682623	+	OPeron	4681503	4682003	4681787	1.93	rpoS	promoter=rpoS;box35pos=248;box35seq=ctgaag;box10pos=271;box10seq=tatgct
YPK_4242	YPK_4242	hypothetical protein KEGG: yps:YPTB3952 hypothetical protein	4682003	4682623	+	OPeron	4681503	4682003	4681861	1.96	rpoD	promoter=rpoD;box35pos=322;box35seq=tgccaa;box10pos=346;box10seq=gatttt
