# Supplementary material for: 6S RNA facilitates bacterial virulence and adaptation at the epithelial barrier
Source: Research Square preprint supplement (doi:10.21203/rs.3.rs-7847320/v1), 2025-11-19
Supplement: Supplementary file 3 [file 462c98d0f2fc9b8ec920eee2.xlsx]

## Sheet: up in tissue
Supplementary Table 3. PATRIC Subsystem analysis of upregulated Yersinia pseudotuberculosis in tissue and lumen.
Superclass	Class	Subclass	Subsystem Name	Role ID	Role Name	Active	PATRIC ID	Gene	Product
Cell Envelope	Cell Envelope, Capsule and Slime layer	Capsule and Slime layer	dTDP-rhamnose synthesis	dTDP-glucose_4,6-dehydratase_(EC_4.2.1.46)	dTDP-glucose 4,6-dehydratase (EC 4.2.1.46)	likely	fig|502800.6.peg.4354		dTDP-glucose 4,6-dehydratase (EC 4.2.1.46)
Cell Envelope	Cell Envelope, Capsule and Slime layer	Gram-Negative (Diderm) cell wall components	Enterobacterial common antigen (LPS O-antigen)	dTDP-glucose_4,6-dehydratase_(EC_4.2.1.46)	dTDP-glucose 4,6-dehydratase (EC 4.2.1.46)	active	fig|502800.6.peg.4354		dTDP-glucose 4,6-dehydratase (EC 4.2.1.46)
Cell Envelope	Cell Envelope, Capsule and Slime layer	Gram-Negative (Diderm) cell wall components	Gram-negative cluster	RNA_polymerase_sigma_factor_RpoD	RNA polymerase sigma factor RpoD	active	fig|502800.6.peg.673		RNA polymerase sigma factor RpoD
Cell Envelope	Cell Envelope, Capsule and Slime layer	Gram-Negative (Diderm) cell wall components	Gram-negative cluster	Acyl-ACP:glycerol-3-phosphate_O-acyltransferase_(EC_2.3.1.n5)	Acyl-ACP:glycerol-3-phosphate O-acyltransferase (EC 2.3.1.n5)	active	fig|502800.6.peg.679		Acyl-ACP:glycerol-3-phosphate O-acyltransferase (EC 2.3.1.n5)
Cell Envelope	Cell Envelope, Capsule and Slime layer	Gram-Negative (Diderm) cell wall components	Outer membrane	Outer_membrane_porin_OmpC	Outer membrane porin OmpC	active	fig|502800.6.peg.3074		Outer membrane porin OmpC
Cell Envelope	Cell Envelope, Capsule and Slime layer	Gram-Negative (Diderm) cell wall components	Outer membrane	Periplasmic_chaperone_of_outer_membrane_proteins_Skp	Periplasmic chaperone of outer membrane proteins Skp	active	fig|502800.6.peg.1152		Periplasmic chaperone of outer membrane proteins Skp @ Outer membrane protein H precursor
Cell Envelope	Cell Envelope, Capsule and Slime layer	Gram-Negative (Diderm) cell wall components	Outer membrane	Outer_membrane_protein_assembly_factor_YaeT	Outer membrane protein assembly factor YaeT	active	fig|502800.6.peg.1151		Outer membrane protein assembly factor YaeT
Cell Envelope	Cell Envelope, Capsule and Slime layer	Gram-Negative (Diderm) cell wall components	Tol-Pal Cell Envelope Complex	Tol-Pal_system_beta_propeller_repeat_protein_TolB	Tol-Pal system beta propeller repeat protein TolB	active	fig|502800.6.peg.3203	tolB	Tol-Pal system beta propeller repeat protein TolB
Cell Envelope	Cell Envelope, Capsule and Slime layer	Gram-Negative (Diderm) cell wall components	TonB-ExbBD energy transducing system	TonB-ExbBD_energy_transducing_system,_ExbB_subunit	TonB-ExbBD energy transducing system, ExbB subunit	active	fig|502800.6.peg.719		TonB-ExbBD energy transducing system, ExbB subunit
Cellular Processes	Cell Cycle, Cell Division and Death		Cell division cluster	Cell_division_protein_FtsZ	Cell division protein FtsZ	likely	fig|502800.6.peg.3798		Cell division protein FtsZ
Cellular Processes	Cell Cycle, Cell Division and Death		Cell division cluster	Cell_division_protein_FtsL	Cell division protein FtsL	likely	fig|502800.6.peg.3810		Cell division protein FtsL
Cellular Processes	Cell Cycle, Cell Division and Death		FtsEX cell-division-associated signaling system	RNA_polymerase_sigma_factor_RpoH	RNA polymerase sigma factor RpoH	active	fig|502800.6.peg.4298		RNA polymerase sigma factor RpoH
Cellular Processes	Cell Cycle, Cell Division and Death		Macromolecular synthesis operon	RNA_polymerase_sigma_factor_RpoD	RNA polymerase sigma factor RpoD	active	fig|502800.6.peg.673		RNA polymerase sigma factor RpoD
Cellular Processes	Cell Cycle, Cell Division and Death		Macromolecular synthesis operon	Carbamoyl-phosphate_synthase_small_chain_(EC_6.3.5.5)	Carbamoyl-phosphate synthase small chain (EC 6.3.5.5)	active	fig|502800.6.peg.3877		Carbamoyl-phosphate synthase small chain (EC 6.3.5.5)
Cellular Processes	Cell Cycle, Cell Division and Death	Stationary phase, Dormancy, Persistence	Ribosomal hibernation related cluster	Ribosome-associated_inhibitor_A	Ribosome-associated inhibitor A	active	fig|502800.6.peg.3623		Ribosome-associated inhibitor A
Cellular Processes	Cell Cycle, Cell Division and Death	Stationary phase, Dormancy, Persistence	Ribosomal hibernation related cluster	Ribosome_hibernation_promoting_factor_Hpf	Ribosome hibernation promoting factor Hpf	active	fig|502800.6.peg.534		Ribosome hibernation promoting factor Hpf
Cellular Processes	Microbial communities	Quorum sensing and biofilm formation	Biofilm Adhesin Biosynthesis	Biofilm_PGA_outer_membrane_secretin_PgaA	Biofilm PGA outer membrane secretin PgaA	active	fig|502800.6.peg.2420	pgaA	Biofilm PGA outer membrane secretin PgaA
DNA Processing	DNA Processing	DNA uptake, competence	DNA processing cluster	Nucleoid-associated_protein_YaaK	Nucleoid-associated protein YaaK	active	fig|502800.6.peg.3448		Nucleoid-associated protein YaaK
DNA Processing	DNA Processing	DNA repair	DNA repair, bacterial	Single-stranded_DNA-binding_protein	Single-stranded DNA-binding protein	active	fig|502800.6.peg.4164		Single-stranded DNA-binding protein
DNA Processing	DNA Processing	DNA repair	DNA repair, bacterial RecFOR pathway	Nucleoid-associated_protein_YaaK	Nucleoid-associated protein YaaK	active	fig|502800.6.peg.3448		Nucleoid-associated protein YaaK
DNA Processing	DNA Processing	DNA repair	DNA repair, bacterial RecFOR pathway	Single-stranded_DNA-binding_protein	Single-stranded DNA-binding protein	active	fig|502800.6.peg.4164		Single-stranded DNA-binding protein
DNA Processing	DNA Processing	DNA recombination	Replication-associated recombination protein RarA	Replication-associated_recombination_protein_RarA	Replication-associated recombination protein RarA	active	fig|502800.6.peg.2896		Replication-associated recombination protein RarA
DNA Processing	DNA Processing	DNA recombination	RuvABC plus a hypothetical	Probable_transcriptional_regulatory_protein_YebC	Probable transcriptional regulatory protein YebC	active	fig|502800.6.peg.2315		Probable transcriptional regulatory protein YebC
Energy	Energy and Precursor Metabolites Generation	Fermentation	Acetolactate synthase subunits	Acetolactate_synthase_small_subunit_(EC_2.2.1.6)	Acetolactate synthase small subunit (EC 2.2.1.6)	active	fig|502800.6.peg.4387	ilvM	Acetolactate synthase small subunit (EC 2.2.1.6)
Energy	Energy and Precursor Metabolites Generation	Central Metabolism	Entner-Doudoroff Pathway	Enolase_(EC_4.2.1.11)	Enolase (EC 4.2.1.11)	active	fig|502800.6.peg.3722	eno	Enolase (EC 4.2.1.11)
Energy	Energy and Precursor Metabolites Generation	Central Metabolism	Entner-Doudoroff Pathway	Phosphoglycerate_mutase_(EC_5.4.2.11)	Phosphoglycerate mutase (EC 5.4.2.11)	active	fig|502800.6.peg.3908		Phosphoglycerate mutase (EC 5.4.2.11)
Energy	Energy and Precursor Metabolites Generation	Central Metabolism	Entner-Doudoroff Pathway	Pyruvate_kinase_(EC_2.7.1.40)	Pyruvate kinase (EC 2.7.1.40)	active	fig|502800.6.peg.2304		Pyruvate kinase (EC 2.7.1.40)
Energy	Energy and Precursor Metabolites Generation	Central Metabolism	Entner-Doudoroff Pathway	Pyruvate_kinase_(EC_2.7.1.40)	Pyruvate kinase (EC 2.7.1.40)	active	fig|502800.6.peg.2003		Pyruvate kinase (EC 2.7.1.40)
Energy	Energy and Precursor Metabolites Generation	Central Metabolism	Entner-Doudoroff Pathway	Phosphoglycerate_mutase_(EC_5.4.2.11)	Phosphoglycerate mutase (EC 5.4.2.11)	active	fig|502800.6.peg.3196		Phosphoglycerate mutase (EC 5.4.2.11)
Energy	Energy and Precursor Metabolites Generation	Central Metabolism	Entner-Doudoroff Pathway	NAD-dependent_glyceraldehyde-3-phosphate_dehydrogenase_(EC_1.2.1.12)	NAD-dependent glyceraldehyde-3-phosphate dehydrogenase (EC 1.2.1.12)	active	fig|502800.6.peg.2263		NAD-dependent glyceraldehyde-3-phosphate dehydrogenase (EC 1.2.1.12)
Energy	Energy and Precursor Metabolites Generation	Central Metabolism	Entner-Doudoroff Pathway	Phosphoglycerate_kinase_(EC_2.7.2.3)	Phosphoglycerate kinase (EC 2.7.2.3)	active	fig|502800.6.peg.911	pgk	Phosphoglycerate kinase (EC 2.7.2.3)
Energy	Energy and Precursor Metabolites Generation	Fermentation	Fermentations: Lactate	Phosphate_acetyltransferase_(EC_2.3.1.8)	Phosphate acetyltransferase (EC 2.3.1.8)	active	fig|502800.6.peg.1659		BioD-like N-terminal domain / Phosphate acetyltransferase (EC 2.3.1.8)
Energy	Energy and Precursor Metabolites Generation	Fermentation	Fermentations: Lactate	Acetaldehyde_dehydrogenase_(EC_1.2.1.10)	Acetaldehyde dehydrogenase (EC 1.2.1.10)	active	fig|502800.6.peg.2239		Acetaldehyde dehydrogenase (EC 1.2.1.10) / Alcohol dehydrogenase (EC 1.1.1.1)
Energy	Energy and Precursor Metabolites Generation	Fermentation	Fermentations: Mixed acid	Phosphate_acetyltransferase_(EC_2.3.1.8)	Phosphate acetyltransferase (EC 2.3.1.8)	active	fig|502800.6.peg.1659		BioD-like N-terminal domain / Phosphate acetyltransferase (EC 2.3.1.8)
Energy	Energy and Precursor Metabolites Generation	Fermentation	Fermentations: Mixed acid	Pyruvate_formate-lyase_(EC_2.3.1.54)	Pyruvate formate-lyase (EC 2.3.1.54)	active	fig|502800.6.peg.2891		Pyruvate formate-lyase (EC 2.3.1.54)
Energy	Energy and Precursor Metabolites Generation	Fermentation	Fermentations: Mixed acid	Acetaldehyde_dehydrogenase_(EC_1.2.1.10)	Acetaldehyde dehydrogenase (EC 1.2.1.10)	active	fig|502800.6.peg.2239		Acetaldehyde dehydrogenase (EC 1.2.1.10) / Alcohol dehydrogenase (EC 1.1.1.1)
Energy	Energy and Precursor Metabolites Generation	Fermentation	Fermentations: Mixed acid	Alcohol_dehydrogenase_(EC_1.1.1.1)	Alcohol dehydrogenase (EC 1.1.1.1)	active	fig|502800.6.peg.2239		Acetaldehyde dehydrogenase (EC 1.2.1.10) / Alcohol dehydrogenase (EC 1.1.1.1)
Energy	Energy and Precursor Metabolites Generation	Central Metabolism	Glycolysis and Gluconeogenesis	Pyruvate_kinase_(EC_2.7.1.40)	Pyruvate kinase (EC 2.7.1.40)	active	fig|502800.6.peg.2304		Pyruvate kinase (EC 2.7.1.40)
Energy	Energy and Precursor Metabolites Generation	Central Metabolism	Glycolysis and Gluconeogenesis	NAD-dependent_glyceraldehyde-3-phosphate_dehydrogenase_(EC_1.2.1.12)	NAD-dependent glyceraldehyde-3-phosphate dehydrogenase (EC 1.2.1.12)	active	fig|502800.6.peg.2263		NAD-dependent glyceraldehyde-3-phosphate dehydrogenase (EC 1.2.1.12)
Energy	Energy and Precursor Metabolites Generation	Central Metabolism	Glycolysis and Gluconeogenesis	Fructose-bisphosphate_aldolase_class_II_(EC_4.1.2.13)	Fructose-bisphosphate aldolase class II (EC 4.1.2.13)	active	fig|502800.6.peg.912		Fructose-bisphosphate aldolase class II (EC 4.1.2.13)
Energy	Energy and Precursor Metabolites Generation	Central Metabolism	Glycolysis and Gluconeogenesis	Phosphoglycerate_kinase_(EC_2.7.2.3)	Phosphoglycerate kinase (EC 2.7.2.3)	active	fig|502800.6.peg.911	pgk	Phosphoglycerate kinase (EC 2.7.2.3)
Energy	Energy and Precursor Metabolites Generation	Central Metabolism	Glycolysis and Gluconeogenesis	Pyruvate_kinase_(EC_2.7.1.40)	Pyruvate kinase (EC 2.7.1.40)	active	fig|502800.6.peg.2003		Pyruvate kinase (EC 2.7.1.40)
Energy	Energy and Precursor Metabolites Generation	Central Metabolism	Glycolysis and Gluconeogenesis	Enolase_(EC_4.2.1.11)	Enolase (EC 4.2.1.11)	active	fig|502800.6.peg.3722	eno	Enolase (EC 4.2.1.11)
Energy	Energy and Precursor Metabolites Generation	Central Metabolism	Glycolysis and Gluconeogenesis	Phosphoglycerate_mutase_(EC_5.4.2.11)	Phosphoglycerate mutase (EC 5.4.2.11)	active	fig|502800.6.peg.3196		Phosphoglycerate mutase (EC 5.4.2.11)
Energy	Energy and Precursor Metabolites Generation	Central Metabolism	Glycolysis and Gluconeogenesis	Phosphoglycerate_mutase_(EC_5.4.2.11)	Phosphoglycerate mutase (EC 5.4.2.11)	active	fig|502800.6.peg.3908		Phosphoglycerate mutase (EC 5.4.2.11)
Energy	Energy and Precursor Metabolites Generation	Central Metabolism	Glycolysis and Gluconeogenesis	Triosephosphate_isomerase_(EC_5.3.1.1)	Triosephosphate isomerase (EC 5.3.1.1)	active	fig|502800.6.peg.4451	tpiA	Triosephosphate isomerase (EC 5.3.1.1)
Energy	Energy and Precursor Metabolites Generation	Central Metabolism	Methylglyoxal Metabolism	Lactoylglutathione_lyase_(EC_4.4.1.5)	Lactoylglutathione lyase (EC 4.4.1.5)	active	fig|502800.6.peg.2017		Lactoylglutathione lyase (EC 4.4.1.5)
Energy	Energy and Precursor Metabolites Generation	Central Metabolism	Pentose phosphate pathway	Transketolase,_N-terminal_section_(EC_2.2.1.1)	Transketolase, N-terminal section (EC 2.2.1.1)	active	fig|502800.6.peg.3654		Transketolase, N-terminal section (EC 2.2.1.1)
Energy	Energy and Precursor Metabolites Generation	Central Metabolism	Pentose phosphate pathway	Ribose-5-phosphate_isomerase_B_(EC_5.3.1.6)	Ribose-5-phosphate isomerase B (EC 5.3.1.6)	active	fig|502800.6.peg.3695		Ribose 5-phosphate isomerase B (EC 5.3.1.6)
Energy	Energy and Precursor Metabolites Generation	Central Metabolism	Pentose phosphate pathway	6-phosphogluconate_dehydrogenase,_decarboxylating_(EC_1.1.1.44)	6-phosphogluconate dehydrogenase, decarboxylating (EC 1.1.1.44)	active	fig|502800.6.peg.2735		6-phosphogluconate dehydrogenase, decarboxylating (EC 1.1.1.44)
Energy	Energy and Precursor Metabolites Generation	Central Metabolism	Pyruvate metabolism I: anaplerotic reactions, PEP	Pyruvate_kinase_(EC_2.7.1.40)	Pyruvate kinase (EC 2.7.1.40)	active	fig|502800.6.peg.2304		Pyruvate kinase (EC 2.7.1.40)
Energy	Energy and Precursor Metabolites Generation	Central Metabolism	Pyruvate metabolism I: anaplerotic reactions, PEP	Phosphoenolpyruvate_carboxykinase_[ATP]_(EC_4.1.1.49)	Phosphoenolpyruvate carboxykinase [ATP] (EC 4.1.1.49)	active	fig|502800.6.peg.193		Phosphoenolpyruvate carboxykinase [ATP] (EC 4.1.1.49)
Energy	Energy and Precursor Metabolites Generation	Central Metabolism	Pyruvate metabolism I: anaplerotic reactions, PEP	Pyruvate_kinase_(EC_2.7.1.40)	Pyruvate kinase (EC 2.7.1.40)	active	fig|502800.6.peg.2003		Pyruvate kinase (EC 2.7.1.40)
Energy	Energy and Precursor Metabolites Generation	Central Metabolism	Pyruvate metabolism II: acetyl-CoA, acetogenesis from pyruvate	Phosphate_acetyltransferase_(EC_2.3.1.8)	Phosphate acetyltransferase (EC 2.3.1.8)	active	fig|502800.6.peg.1659		BioD-like N-terminal domain / Phosphate acetyltransferase (EC 2.3.1.8)
Energy	Energy and Precursor Metabolites Generation	Central Metabolism	Pyruvate metabolism II: acetyl-CoA, acetogenesis from pyruvate	Acetaldehyde_dehydrogenase_(EC_1.2.1.10)	Acetaldehyde dehydrogenase (EC 1.2.1.10)	active	fig|502800.6.peg.2239		Acetaldehyde dehydrogenase (EC 1.2.1.10) / Alcohol dehydrogenase (EC 1.1.1.1)
Energy	Energy and Precursor Metabolites Generation	Central Metabolism	Pyruvate metabolism II: acetyl-CoA, acetogenesis from pyruvate	Dihydrolipoamide_acetyltransferase_component_of_pyruvate_dehydrogenase_complex_(EC_2.3.1.12)	Dihydrolipoamide acetyltransferase component of pyruvate dehydrogenase complex (EC 2.3.1.12)	active	fig|502800.6.peg.3776		Dihydrolipoamide acetyltransferase component of pyruvate dehydrogenase complex (EC 2.3.1.12)
Energy	Energy and Precursor Metabolites Generation	Central Metabolism	TCA Cycle	Fumarate_hydratase_class_I_(EC_4.2.1.2)	Fumarate hydratase class I (EC 4.2.1.2)	active	fig|502800.6.peg.3675		Fumarate hydratase class I (EC 4.2.1.2)
Energy	Respiration	Biogenesis of respiratory chain components	Biogenesis of c-type cytochromes	ATP-dependent_Clp_protease_proteolytic_subunit_ClpP_(EC_3.4.21.92)	ATP-dependent Clp protease proteolytic subunit ClpP (EC 3.4.21.92)	active	fig|502800.6.peg.3487	clpP	ATP-dependent Clp protease proteolytic subunit (EC 3.4.21.92)
Energy	Respiration	ATP synthases	F0F1-type ATP synthase	ATP_synthase_gamma_chain_(EC_3.6.3.14)	ATP synthase gamma chain (EC 3.6.3.14)	active	fig|502800.6.peg.4561		ATP synthase gamma chain (EC 3.6.3.14)
Energy	Respiration	ATP synthases	F0F1-type ATP synthase	ATP_synthase_F0_sector_subunit_b_(EC_3.6.3.14)	ATP synthase F0 sector subunit b (EC 3.6.3.14)	active	fig|502800.6.peg.4558		ATP synthase F0 sector subunit b (EC 3.6.3.14)
Energy	Respiration	ATP synthases	F0F1-type ATP synthase	ATP_synthase_beta_chain_(EC_3.6.3.14)	ATP synthase beta chain (EC 3.6.3.14)	active	fig|502800.6.peg.4563		ATP synthase beta chain (EC 3.6.3.14)
Energy	Respiration	Electron donating reactions	NADH ubiquinone oxidoreductase	NADH-ubiquinone_oxidoreductase_chain_F_(EC_1.6.5.3)	NADH-ubiquinone oxidoreductase chain F (EC 1.6.5.3)	active	fig|502800.6.peg.1678		NADH-ubiquinone oxidoreductase chain F (EC 1.6.5.3)
Energy	Respiration	Electron donating reactions	NADH ubiquinone oxidoreductase	NADH-ubiquinone_oxidoreductase_chain_C_(EC_1.6.5.3)	NADH-ubiquinone oxidoreductase chain C (EC 1.6.5.3)	active	fig|502800.6.peg.1676		NADH-ubiquinone oxidoreductase chain C (EC 1.6.5.3) / NADH-ubiquinone oxidoreductase chain D (EC 1.6.5.3)
Energy	Respiration	Electron donating reactions	NADH ubiquinone oxidoreductase	NADH-ubiquinone_oxidoreductase_chain_D_(EC_1.6.5.3)	NADH-ubiquinone oxidoreductase chain D (EC 1.6.5.3)	active	fig|502800.6.peg.1676		NADH-ubiquinone oxidoreductase chain C (EC 1.6.5.3) / NADH-ubiquinone oxidoreductase chain D (EC 1.6.5.3)
Energy	Respiration	Electron donating reactions	NADH ubiquinone oxidoreductase vs. multi-subunit cation antiporter	NADH-ubiquinone_oxidoreductase_chain_D_(EC_1.6.5.3)	NADH-ubiquinone oxidoreductase chain D (EC 1.6.5.3)	active	fig|502800.6.peg.1676		NADH-ubiquinone oxidoreductase chain C (EC 1.6.5.3) / NADH-ubiquinone oxidoreductase chain D (EC 1.6.5.3)
Energy	Respiration	Electron donating reactions	NADH ubiquinone oxidoreductase vs. multi-subunit cation antiporter	NADH-ubiquinone_oxidoreductase_chain_F_(EC_1.6.5.3)	NADH-ubiquinone oxidoreductase chain F (EC 1.6.5.3)	active	fig|502800.6.peg.1678		NADH-ubiquinone oxidoreductase chain F (EC 1.6.5.3)
Energy	Respiration	Electron donating reactions	NADH ubiquinone oxidoreductase vs. multi-subunit cation antiporter	NADH-ubiquinone_oxidoreductase_chain_C_(EC_1.6.5.3)	NADH-ubiquinone oxidoreductase chain C (EC 1.6.5.3)	active	fig|502800.6.peg.1676		NADH-ubiquinone oxidoreductase chain C (EC 1.6.5.3) / NADH-ubiquinone oxidoreductase chain D (EC 1.6.5.3)
Energy	Respiration		Quinone oxidoreductase family	Quinone_oxidoreductase_(EC_1.6.5.5)	Quinone oxidoreductase (EC 1.6.5.5)	active	fig|502800.6.peg.4170		Quinone oxidoreductase (EC 1.6.5.5)
Energy	Respiration	Electron donating reactions	Respiratory Complex I	NADH-ubiquinone_oxidoreductase_chain_D_(EC_1.6.5.3)	NADH-ubiquinone oxidoreductase chain D (EC 1.6.5.3)	active	fig|502800.6.peg.1676		NADH-ubiquinone oxidoreductase chain C (EC 1.6.5.3) / NADH-ubiquinone oxidoreductase chain D (EC 1.6.5.3)
Energy	Respiration	Electron donating reactions	Respiratory Complex I	NADH-ubiquinone_oxidoreductase_chain_F_(EC_1.6.5.3)	NADH-ubiquinone oxidoreductase chain F (EC 1.6.5.3)	active	fig|502800.6.peg.1678		NADH-ubiquinone oxidoreductase chain F (EC 1.6.5.3)
Energy	Respiration	Electron donating reactions	Respiratory Complex I	NADH-ubiquinone_oxidoreductase_chain_C_(EC_1.6.5.3)	NADH-ubiquinone oxidoreductase chain C (EC 1.6.5.3)	active	fig|502800.6.peg.1676		NADH-ubiquinone oxidoreductase chain C (EC 1.6.5.3) / NADH-ubiquinone oxidoreductase chain D (EC 1.6.5.3)
Energy	Respiration	Electron donating reactions	Succinate dehydrogenase and Fumarate reductase cpmlexes	Fumarate_reductase_flavoprotein_subunit_(EC_1.3.5.4)	Fumarate reductase flavoprotein subunit (EC 1.3.5.4)	active	fig|502800.6.peg.4126		Fumarate reductase flavoprotein subunit (EC 1.3.5.4)
Membrane Transport	Membrane Transport	Multidrug efflux systems	Tripartite multidrug efflux systems (of RND type) AcrAB-TolC and related transporters	DNA-binding_protein_H-NS	DNA-binding protein H-NS	active	fig|502800.6.peg.2242		DNA-binding protein H-NS
Metabolism	Amino Acids and Derivatives	Branched-chain amino acids	Branched-Chain Amino Acid Biosynthesis	Acetolactate_synthase_small_subunit_(EC_2.2.1.6)	Acetolactate synthase small subunit (EC 2.2.1.6)	active	fig|502800.6.peg.4387	ilvM	Acetolactate synthase small subunit (EC 2.2.1.6)
Metabolism	Amino Acids and Derivatives	Aromatic amino acids and derivatives	Chorismate Synthesis	Prephenate_dehydratase_(EC_4.2.1.51)	Prephenate dehydratase (EC 4.2.1.51)	active	fig|502800.6.peg.3685		Prephenate dehydratase (EC 4.2.1.51) @ Arogenate dehydratase (EC 4.2.1.91)
Metabolism	Amino Acids and Derivatives	Lysine, threonine, methionine, and cysteine	Cysteine synthesis	3'(2'),5'-bisphosphate_nucleotidase_(EC_3.1.3.7)	3'(2'),5'-bisphosphate nucleotidase (EC 3.1.3.7)	active	fig|502800.6.peg.4086		3'(2'),5'-bisphosphate nucleotidase (EC 3.1.3.7)
Metabolism	Amino Acids and Derivatives	Lysine, threonine, methionine, and cysteine	Cysteine synthesis	Sulfite_reductase_[NADPH]_hemoprotein_beta-component_(EC_1.8.1.2)	Sulfite reductase [NADPH] hemoprotein beta-component (EC 1.8.1.2)	active	fig|502800.6.peg.3716		Sulfite reductase [NADPH] hemoprotein beta-component (EC 1.8.1.2)
Metabolism	Amino Acids and Derivatives	Lysine, threonine, methionine, and cysteine	Cysteine synthesis	Cysteine_synthase_(EC_2.5.1.47)	Cysteine synthase (EC 2.5.1.47)	active	fig|502800.6.peg.1522		Cysteine synthase (EC 2.5.1.47)
Metabolism	Amino Acids and Derivatives	Alanine, serine, and glycine	D-3-phosphoglycerate to phosphoserine module	D-3-phosphoglycerate_dehydrogenase_(EC_1.1.1.95)	D-3-phosphoglycerate dehydrogenase (EC 1.1.1.95)	active	fig|502800.6.peg.919		D-3-phosphoglycerate dehydrogenase (EC 1.1.1.95)
Metabolism	Amino Acids and Derivatives	Histidine Metabolism	Histidine Biosynthesis	Imidazole_glycerol_phosphate_synthase_amidotransferase_subunit_HisH	Imidazole glycerol phosphate synthase amidotransferase subunit HisH	active	fig|502800.6.peg.2730	hisH	Imidazole glycerol phosphate synthase amidotransferase subunit (EC 2.4.2.-)
Metabolism	Amino Acids and Derivatives	Histidine Metabolism	Histidine Degradation	N-formylglutamate_deformylase_(EC_3.5.1.68)	N-formylglutamate deformylase (EC 3.5.1.68)	active	fig|502800.6.peg.2399		N-formylglutamate deformylase (EC 3.5.1.68)
Metabolism	Amino Acids and Derivatives	Aromatic amino acids and derivatives	Phenylalanine and Tyrosine synthesis 1	Prephenate_dehydratase_(EC_4.2.1.51)	Prephenate dehydratase (EC 4.2.1.51)	active	fig|502800.6.peg.3685		Prephenate dehydratase (EC 4.2.1.51) @ Arogenate dehydratase (EC 4.2.1.91)
Metabolism	Amino Acids and Derivatives	Aromatic amino acids and derivatives	Phenylalanine and Tyrosine synthesis 1	Arogenate_dehydratase_(EC_4.2.1.91)	Arogenate dehydratase (EC 4.2.1.91)	active	fig|502800.6.peg.3685		Prephenate dehydratase (EC 4.2.1.51) @ Arogenate dehydratase (EC 4.2.1.91)
Metabolism	Amino Acids and Derivatives	Proline and 4-hydroxyproline	Proline, 4-hydroxyproline uptake and utilization	RNA_chaperone_ProQ	RNA chaperone ProQ	active	fig|502800.6.peg.1924		RNA chaperone ProQ
Metabolism	Amino Acids and Derivatives	Arginine; urea cycle, creatine, polyamines	Urease subunits	Urease_beta_subunit_(EC_3.5.1.5)	Urease beta subunit (EC 3.5.1.5)	active	fig|502800.6.peg.1211	ureB	Urease beta subunit (EC 3.5.1.5)
Metabolism	Amino Acids and Derivatives	Arginine; urea cycle, creatine, polyamines	Urease subunits	Urease_gamma_subunit_(EC_3.5.1.5)	Urease gamma subunit (EC 3.5.1.5)	active	fig|502800.6.peg.1210	ureA	Urease gamma subunit (EC 3.5.1.5)
Metabolism	Amino Acids and Derivatives	Arginine; urea cycle, creatine, polyamines	Urease subunits	Urease_alpha_subunit_(EC_3.5.1.5)	Urease alpha subunit (EC 3.5.1.5)	active	fig|502800.6.peg.1212	ureC	Urease alpha subunit (EC 3.5.1.5)
Metabolism	Amino Acids and Derivatives	Arginine; urea cycle, creatine, polyamines	Urease subunits	Urease_accessory_protein_UreG	Urease accessory protein UreG	active	fig|502800.6.peg.1215		Urease accessory protein UreG
Metabolism	Carbohydrates	Polysaccharides	Glycogen metabolism	Glycogen_phosphorylase_(EC_2.4.1.1)	Glycogen phosphorylase (EC 2.4.1.1)	active	fig|502800.6.peg.166		Glycogen phosphorylase (EC 2.4.1.1)
Metabolism	Carbohydrates	Di- and oligosaccharides	Lactose utilization	Lactose_permease	Lactose permease	active	fig|502800.6.peg.2688	lacY	Lactose permease
Metabolism	Carbohydrates	Amino sugars and nucleotide sugars	N-acetylneuraminate utilization	N-acetylneuraminate_lyase_(EC_4.1.3.3)	N-acetylneuraminate lyase (EC 4.1.3.3)	active	fig|502800.6.peg.1489		N-acetylneuraminate lyase (EC 4.1.3.3)
Metabolism	Cofactors, Vitamins, Prosthetic Groups	Biotin	Biotin biosynthesis	Long-chain-fatty-acid--CoA_ligase_(EC_6.2.1.3)	Long-chain-fatty-acid--CoA ligase (EC 6.2.1.3)	active	fig|502800.6.peg.3821		Long-chain-fatty-acid--CoA ligase (EC 6.2.1.3)
Metabolism	Cofactors, Vitamins, Prosthetic Groups	Biotin	Biotin synthesis & utilization	Long-chain-fatty-acid--CoA_ligase_(EC_6.2.1.3)	Long-chain-fatty-acid--CoA ligase (EC 6.2.1.3)	active	fig|502800.6.peg.3821		Long-chain-fatty-acid--CoA ligase (EC 6.2.1.3)
Metabolism	Cofactors, Vitamins, Prosthetic Groups	Coenzyme A	Coenzyme A	Pantoate--beta-alanine_ligase_(EC_6.3.2.1)	Pantoate--beta-alanine ligase (EC 6.3.2.1)	active	fig|502800.6.peg.3755	panC	Pantoate--beta-alanine ligase (EC 6.3.2.1)
Metabolism	Cofactors, Vitamins, Prosthetic Groups	Coenzyme A	Coenzyme A Biosynthesis cluster	Pantoate--beta-alanine_ligase_(EC_6.3.2.1)	Pantoate--beta-alanine ligase (EC 6.3.2.1)	likely	fig|502800.6.peg.3755	panC	Pantoate--beta-alanine ligase (EC 6.3.2.1)
Metabolism	Cofactors, Vitamins, Prosthetic Groups	Folate and pterines	Folate Biosynthesis	Serine_hydroxymethyltransferase_(EC_2.1.2.1)	Serine hydroxymethyltransferase (EC 2.1.2.1)	active	fig|502800.6.peg.1344	glyA	Serine hydroxymethyltransferase (EC 2.1.2.1)
Metabolism	Cofactors, Vitamins, Prosthetic Groups	Folate and pterines	Folate biosynthesis cluster	Pantoate--beta-alanine_ligase_(EC_6.3.2.1)	Pantoate--beta-alanine ligase (EC 6.3.2.1)	likely	fig|502800.6.peg.3755	panC	Pantoate--beta-alanine ligase (EC 6.3.2.1)
Metabolism	Cofactors, Vitamins, Prosthetic Groups	Lipoic acid	Lipoic acid metabolism	Dihydrolipoamide_acetyltransferase_component_of_pyruvate_dehydrogenase_complex_(EC_2.3.1.12)	Dihydrolipoamide acetyltransferase component of pyruvate dehydrogenase complex (EC 2.3.1.12)	active	fig|502800.6.peg.3776		Dihydrolipoamide acetyltransferase component of pyruvate dehydrogenase complex (EC 2.3.1.12)
Metabolism	Cofactors, Vitamins, Prosthetic Groups	Lipoic acid	Lipoylated proteins	Dihydrolipoamide_acetyltransferase_component_of_pyruvate_dehydrogenase_complex_(EC_2.3.1.12)	Dihydrolipoamide acetyltransferase component of pyruvate dehydrogenase complex (EC 2.3.1.12)	active	fig|502800.6.peg.3776		Dihydrolipoamide acetyltransferase component of pyruvate dehydrogenase complex (EC 2.3.1.12)
Metabolism	Cofactors, Vitamins, Prosthetic Groups	Pyridoxine	Pyridoxin (Vitamin B6) Biosynthesis	NAD-dependent_glyceraldehyde-3-phosphate_dehydrogenase_(EC_1.2.1.12)	NAD-dependent glyceraldehyde-3-phosphate dehydrogenase (EC 1.2.1.12)	active	fig|502800.6.peg.2263		NAD-dependent glyceraldehyde-3-phosphate dehydrogenase (EC 1.2.1.12)
Metabolism	Cofactors, Vitamins, Prosthetic Groups	Pyridoxine	Pyridoxin (Vitamin B6) Biosynthesis	D-3-phosphoglycerate_dehydrogenase_(EC_1.1.1.95)	D-3-phosphoglycerate dehydrogenase (EC 1.1.1.95)	active	fig|502800.6.peg.919		D-3-phosphoglycerate dehydrogenase (EC 1.1.1.95)
Metabolism	Fatty Acids, Lipids, and Isoprenoids	Fatty acids	Acyl carrier protein	Acyl_carrier_protein	Acyl carrier protein	active	fig|502800.6.peg.1823	acpP	Acyl carrier protein
Metabolism	Fatty Acids, Lipids, and Isoprenoids	Fatty acids	Fatty Acid Biosynthesis cluster	3-oxoacyl-[acyl-carrier_protein]_reductase_(EC_1.1.1.100),_FadG	3-oxoacyl-[acyl-carrier protein] reductase (EC 1.1.1.100), FadG	active	fig|502800.6.peg.1822	fabG	3-oxoacyl-[acyl-carrier protein] reductase (EC 1.1.1.100)
Metabolism	Fatty Acids, Lipids, and Isoprenoids	Fatty acids	Fatty Acid Biosynthesis cluster	Acyl_carrier_protein	Acyl carrier protein	active	fig|502800.6.peg.1823	acpP	Acyl carrier protein
Metabolism	Fatty Acids, Lipids, and Isoprenoids	Fatty acids	Fatty Acid Biosynthesis cluster	Malonyl_CoA-acyl_carrier_protein_transacylase_(EC_2.3.1.39)	Malonyl CoA-acyl carrier protein transacylase (EC 2.3.1.39)	active	fig|502800.6.peg.1821		Malonyl CoA-acyl carrier protein transacylase (EC 2.3.1.39)
Metabolism	Fatty Acids, Lipids, and Isoprenoids	Fatty acids	Fatty Acid Biosynthesis FASII	Malonyl_CoA-acyl_carrier_protein_transacylase_(EC_2.3.1.39)	Malonyl CoA-acyl carrier protein transacylase (EC 2.3.1.39)	likely	fig|502800.6.peg.1821		Malonyl CoA-acyl carrier protein transacylase (EC 2.3.1.39)
Metabolism	Fatty Acids, Lipids, and Isoprenoids	Fatty acids	Fatty Acid Biosynthesis FASII	Acyl_carrier_protein	Acyl carrier protein	likely	fig|502800.6.peg.1823	acpP	Acyl carrier protein
Metabolism	Fatty Acids, Lipids, and Isoprenoids	Fatty acids	Fatty Acid Biosynthesis FASII	3-oxoacyl-[acyl-carrier_protein]_reductase_(EC_1.1.1.100),_FadG	3-oxoacyl-[acyl-carrier protein] reductase (EC 1.1.1.100), FadG	likely	fig|502800.6.peg.1822	fabG	3-oxoacyl-[acyl-carrier protein] reductase (EC 1.1.1.100)
Metabolism	Fatty Acids, Lipids, and Isoprenoids	Fatty acids	Fatty Acid Biosynthesis FASII	3-hydroxyacyl-[acyl-carrier-protein]_dehydratase,_FabA_form_(EC_4.2.1.59)	3-hydroxyacyl-[acyl-carrier-protein] dehydratase, FabA form (EC 4.2.1.59)	likely	fig|502800.6.peg.2840		3-hydroxyacyl-[acyl-carrier-protein] dehydratase, FabA form (EC 4.2.1.59) @ Trans-2-decenoyl-[acyl-carrier-protein] isomerase (EC 5.3.3.14)
Metabolism	Fatty Acids, Lipids, and Isoprenoids	Fatty acids	Fatty acid synthesis	3-hydroxyacyl-[acyl-carrier-protein]_dehydratase,_FabA_form_(EC_4.2.1.59)	3-hydroxyacyl-[acyl-carrier-protein] dehydratase, FabA form (EC 4.2.1.59)	active	fig|502800.6.peg.2840		3-hydroxyacyl-[acyl-carrier-protein] dehydratase, FabA form (EC 4.2.1.59) @ Trans-2-decenoyl-[acyl-carrier-protein] isomerase (EC 5.3.3.14)
Metabolism	Fatty Acids, Lipids, and Isoprenoids	Fatty acids	Fatty acid synthesis	Malonyl_CoA-acyl_carrier_protein_transacylase_(EC_2.3.1.39)	Malonyl CoA-acyl carrier protein transacylase (EC 2.3.1.39)	active	fig|502800.6.peg.1821		Malonyl CoA-acyl carrier protein transacylase (EC 2.3.1.39)
Metabolism	Fatty Acids, Lipids, and Isoprenoids	Fatty acids	Fatty acid synthesis	3-oxoacyl-[acyl-carrier_protein]_reductase_(EC_1.1.1.100),_FadG	3-oxoacyl-[acyl-carrier protein] reductase (EC 1.1.1.100), FadG	active	fig|502800.6.peg.1822	fabG	3-oxoacyl-[acyl-carrier protein] reductase (EC 1.1.1.100)
Metabolism	Fatty Acids, Lipids, and Isoprenoids	Fatty acids	Fatty acid synthesis	Acyl_carrier_protein	Acyl carrier protein	active	fig|502800.6.peg.1823	acpP	Acyl carrier protein
Metabolism	Fatty Acids, Lipids, and Isoprenoids	Phospholipids	Glycerolipid and Glycerophospholipid Metabolism in Bacteria	Alcohol_dehydrogenase_(EC_1.1.1.1)	Alcohol dehydrogenase (EC 1.1.1.1)	active	fig|502800.6.peg.2239		Acetaldehyde dehydrogenase (EC 1.2.1.10) / Alcohol dehydrogenase (EC 1.1.1.1)
Metabolism	Fatty Acids, Lipids, and Isoprenoids	Phospholipids	Glycerolipid and Glycerophospholipid Metabolism in Bacteria	Acyl_carrier_protein	Acyl carrier protein	active	fig|502800.6.peg.1823	acpP	Acyl carrier protein
Metabolism	Fatty Acids, Lipids, and Isoprenoids	Isoprenoids	Nonmevalonate Branch of Isoprenoid Biosynthesis	4-diphosphocytidyl-2-C-methyl-D-erythritol_kinase_(EC_2.7.1.148)	4-diphosphocytidyl-2-C-methyl-D-erythritol kinase (EC 2.7.1.148)	active	fig|502800.6.peg.2354	ipk	4-diphosphocytidyl-2-C-methyl-D-erythritol kinase (EC 2.7.1.148)
Metabolism	Iron acquisition and metabolism		Heme, hemin uptake and utilization systems in GramPositives	Hemin_transport_protein_HmuS	Hemin transport protein HmuS	likely	fig|502800.6.peg.4207		Hemin transport protein HmuS
Metabolism	Iron acquisition and metabolism		Iron acquisition in Streptococcus	Ferric_iron_ABC_transporter,_iron-binding_protein	Ferric iron ABC transporter, iron-binding protein	active	fig|502800.6.peg.1560		Ferric iron ABC transporter, iron-binding protein
Metabolism	Iron acquisition and metabolism	Siderophores	Siderophore assembly kit	TonB-dependent_hemin,_ferrichrome_receptor	TonB-dependent hemin, ferrichrome receptor	active	fig|502800.6.peg.4206		TonB-dependent hemin, ferrichrome receptor
Metabolism	Nucleosides and Nucleotides	Pyrimidines	De Novo Pyrimidine Synthesis	Carbamoyl-phosphate_synthase_small_chain_(EC_6.3.5.5)	Carbamoyl-phosphate synthase small chain (EC 6.3.5.5)	active	fig|502800.6.peg.3877		Carbamoyl-phosphate synthase small chain (EC 6.3.5.5)
Metabolism	Nucleosides and Nucleotides	Pyrimidines	De Novo Pyrimidine Synthesis	Dihydroorotase_(EC_3.5.2.3)	Dihydroorotase (EC 3.5.2.3)	active	fig|502800.6.peg.1810		Dihydroorotase (EC 3.5.2.3)
Miscellaneous	Miscellaneous		beta-Barrel Assembly Machinery	Outer_membrane_beta-barrel_assembly_protein_BamB	Outer membrane beta-barrel assembly protein BamB	active	fig|502800.6.peg.1379		Outer membrane beta-barrel assembly protein BamB
Miscellaneous	Miscellaneous		beta-Barrel Assembly Machinery	Outer_membrane_protein_assembly_factor_YaeT	Outer membrane protein assembly factor YaeT	active	fig|502800.6.peg.1151		Outer membrane protein assembly factor YaeT
Miscellaneous	Miscellaneous		beta-Barrel Assembly Machinery	Outer_membrane_beta-barrel_assembly_protein_BamE	Outer membrane beta-barrel assembly protein BamE	active	fig|502800.6.peg.3224		Outer membrane beta-barrel assembly protein BamE
Miscellaneous	Miscellaneous		HU-alpha and dsDNA mimic protein interaction	DNA-binding_protein_HU-alpha	DNA-binding protein HU-alpha	active	fig|502800.6.peg.371		DNA-binding protein HU-alpha
Miscellaneous	Miscellaneous		Nickel-requiring	Urease_alpha_subunit_(EC_3.5.1.5)	Urease alpha subunit (EC 3.5.1.5)	active	fig|502800.6.peg.1212	ureC	Urease alpha subunit (EC 3.5.1.5)
Miscellaneous	Miscellaneous		Nickel-requiring	Urease_gamma_subunit_(EC_3.5.1.5)	Urease gamma subunit (EC 3.5.1.5)	active	fig|502800.6.peg.1210	ureA	Urease gamma subunit (EC 3.5.1.5)
Miscellaneous	Miscellaneous		Nickel-requiring	Urease_beta_subunit_(EC_3.5.1.5)	Urease beta subunit (EC 3.5.1.5)	active	fig|502800.6.peg.1211	ureB	Urease beta subunit (EC 3.5.1.5)
Protein Processing	Protein Fate (folding, modification, targeting, degradation)	Protein folding	Chaperones GroEL GroES and Thermosome	Chaperone_protein_DnaK	Chaperone protein DnaK	active	fig|502800.6.peg.3892	dnaK	Chaperone protein DnaK
Protein Processing	Protein Fate (folding, modification, targeting, degradation)	Protein folding	Chaperones GroEL GroES and Thermosome	Heat_shock_protein_10_kDa_family_chaperone_GroES	Heat shock protein 10 kDa family chaperone GroES	active	fig|502800.6.peg.4137	groES	Heat shock protein 60 family co-chaperone GroES
Protein Processing	Protein Fate (folding, modification, targeting, degradation)	Protein folding	Chaperones GroEL GroES and Thermosome	Heat_shock_protein_60_kDa_family_chaperone_GroEL	Heat shock protein 60 kDa family chaperone GroEL	active	fig|502800.6.peg.4136	groEL	Heat shock protein 60 family chaperone GroEL
Protein Processing	Protein Fate (folding, modification, targeting, degradation)	Protein folding	Peptidyl-prolyl cis-trans isomerase	FKBP-type_peptidyl-prolyl_cis-trans_isomerase_FkpA_precursor_(EC_5.2.1.8)	FKBP-type peptidyl-prolyl cis-trans isomerase FkpA precursor (EC 5.2.1.8)	active	fig|502800.6.peg.289		FKBP-type peptidyl-prolyl cis-trans isomerase FkpA precursor (EC 5.2.1.8)
Protein Processing	Protein Fate (folding, modification, targeting, degradation)	Protein folding	Peptidyl-prolyl cis-trans isomerase	Peptidyl-prolyl_cis-trans_isomerase_PpiB_(EC_5.2.1.8)	Peptidyl-prolyl cis-trans isomerase PpiB (EC 5.2.1.8)	active	fig|502800.6.peg.3402		Peptidyl-prolyl cis-trans isomerase PpiB (EC 5.2.1.8)
Protein Processing	Protein Fate (folding, modification, targeting, degradation)	Protein folding	Peptidyl-prolyl cis-trans isomerase	Peptidyl-prolyl_cis-trans_isomerase_PpiC_(EC_5.2.1.8)	Peptidyl-prolyl cis-trans isomerase PpiC (EC 5.2.1.8)	active	fig|502800.6.peg.4366		Peptidyl-prolyl cis-trans isomerase PpiC (EC 5.2.1.8)
Protein Processing	Protein Fate (folding, modification, targeting, degradation)	Protein folding	Peptidyl-prolyl cis-trans isomerase	FKBP-type_peptidyl-prolyl_cis-trans_isomerase_SlyD_(EC_5.2.1.8)	FKBP-type peptidyl-prolyl cis-trans isomerase SlyD (EC 5.2.1.8)	active	fig|502800.6.peg.286		FKBP-type peptidyl-prolyl cis-trans isomerase SlyD (EC 5.2.1.8)
Protein Processing	Protein Fate (folding, modification, targeting, degradation)	Protein degradation	Proteasome bacterial	ATP-dependent_Clp_protease_proteolytic_subunit_ClpP_(EC_3.4.21.92)	ATP-dependent Clp protease proteolytic subunit ClpP (EC 3.4.21.92)	active	fig|502800.6.peg.3487	clpP	ATP-dependent Clp protease proteolytic subunit (EC 3.4.21.92)
Protein Processing	Protein Fate (folding, modification, targeting, degradation)	Protein folding	Protein chaperones	Chaperone_protein_HtpG	Chaperone protein HtpG	active	fig|502800.6.peg.3445		Chaperone protein HtpG
Protein Processing	Protein Fate (folding, modification, targeting, degradation)	Protein folding	Protein chaperones	Chaperone_protein_DnaK	Chaperone protein DnaK	active	fig|502800.6.peg.3892	dnaK	Chaperone protein DnaK
Protein Processing	Protein Fate (folding, modification, targeting, degradation)	Protein processing and modification	Ribosomal protein S5p acylation	Ribosomal-protein-S5p-alanine_acetyltransferase_(EC_2.3.1.128)	Ribosomal-protein-S5p-alanine acetyltransferase (EC 2.3.1.128)	active	fig|502800.6.peg.2332		Ribosomal-protein-S5p-alanine acetyltransferase (EC 2.3.1.128)
Protein Processing	Protein Fate (folding, modification, targeting, degradation)	Protein targeting, sorting, translocation	Twin-arginine translocation system	Twin-arginine_translocation_protein_TatA	Twin-arginine translocation protein TatA	active	fig|502800.6.peg.4264		Twin-arginine translocation protein TatA
Protein Processing	Protein Synthesis	Ribosome biogenesis	Ribosomal proteins, single-copy	SSU_ribosomal_protein_S8p_(S15Ae)	SSU ribosomal protein S8p (S15Ae)	active	fig|502800.6.peg.316	rpsH	SSU ribosomal protein S8p (S15Ae)
Protein Processing	Protein Synthesis	Ribosome biogenesis	Ribosomal proteins, single-copy	LSU_ribosomal_protein_L4p_(L1e)	LSU ribosomal protein L4p (L1e)	active	fig|502800.6.peg.303	rplD	LSU ribosomal protein L4p (L1e)
Protein Processing	Protein Synthesis	Ribosome biogenesis	Ribosomal proteins, single-copy	SSU_ribosomal_protein_S2p_(SAe)	SSU ribosomal protein S2p (SAe)	active	fig|502800.6.peg.1143	rpsB	SSU ribosomal protein S2p (SAe)
Protein Processing	Protein Synthesis	Ribosome biogenesis	Ribosomal proteins, single-copy	SSU_ribosomal_protein_S3p_(S3e)	SSU ribosomal protein S3p (S3e)	active	fig|502800.6.peg.308	rpsC	SSU ribosomal protein S3p (S3e)
Protein Processing	Protein Synthesis	Ribosome biogenesis	Ribosomal proteins, single-copy	LSU_ribosomal_protein_L21p	LSU ribosomal protein L21p	active	fig|502800.6.peg.4068	rplU	LSU ribosomal protein L21p
Protein Processing	Protein Synthesis	Ribosome biogenesis	Ribosomal proteins, single-copy	LSU_ribosomal_protein_L11p_(L12e)	LSU ribosomal protein L11p (L12e)	active	fig|502800.6.peg.352	rplK	LSU ribosomal protein L11p (L12e)
Protein Processing	Protein Synthesis	Ribosome biogenesis	Ribosomal proteins, single-copy	SSU_ribosomal_protein_S12p_(S23e)	SSU ribosomal protein S12p (S23e)	active	fig|502800.6.peg.294	rpsL	SSU ribosomal protein S12p (S23e)
Protein Processing	Protein Synthesis	Ribosome biogenesis	Ribosomal proteins, single-copy	LSU_ribosomal_protein_L23p_(L23Ae)	LSU ribosomal protein L23p (L23Ae)	active	fig|502800.6.peg.304	rplW	LSU ribosomal protein L23p (L23Ae)
Protein Processing	Protein Synthesis	Ribosome biogenesis	Ribosomal proteins, single-copy	LSU_ribosomal_protein_L6p_(L9e)	LSU ribosomal protein L6p (L9e)	active	fig|502800.6.peg.317	rplF	LSU ribosomal protein L6p (L9e)
Protein Processing	Protein Synthesis	Ribosome biogenesis	Ribosomal proteins, single-copy	SSU_ribosomal_protein_S19p_(S15e)	SSU ribosomal protein S19p (S15e)	active	fig|502800.6.peg.306	rpsS	SSU ribosomal protein S19p (S15e)
Protein Processing	Protein Synthesis	Ribosome biogenesis	Ribosomal proteins, single-copy	LSU_ribosomal_protein_L3p_(L3e)	LSU ribosomal protein L3p (L3e)	active	fig|502800.6.peg.302	rplC	LSU ribosomal protein L3p (L3e)
Protein Processing	Protein Synthesis	Ribosome biogenesis	Ribosomal proteins, single-copy	SSU_ribosomal_protein_S13p_(S18e)	SSU ribosomal protein S13p (S18e)	active	fig|502800.6.peg.324	rpsM	SSU ribosomal protein S13p (S18e)
Protein Processing	Protein Synthesis	Ribosome biogenesis	Ribosomal proteins, single-copy	SSU_ribosomal_protein_S10p_(S20e)	SSU ribosomal protein S10p (S20e)	active	fig|502800.6.peg.301		SSU ribosomal protein S10p (S20e)
Protein Processing	Protein Synthesis	Ribosome biogenesis	Ribosomal proteins, single-copy	LSU_ribosomal_protein_L16p_(L10e)	LSU ribosomal protein L16p (L10e)	active	fig|502800.6.peg.309	rplP	LSU ribosomal protein L16p (L10e)
Protein Processing	Protein Synthesis	Ribosome biogenesis	Ribosomal proteins, single-copy	LSU_ribosomal_protein_L15p_(L27Ae)	LSU ribosomal protein L15p (L27Ae)	active	fig|502800.6.peg.321	rplO	LSU ribosomal protein L15p (L27Ae)
Protein Processing	Protein Synthesis	Ribosome biogenesis	Ribosomal proteins, single-copy	SSU_ribosomal_protein_S11p_(S14e)	SSU ribosomal protein S11p (S14e)	active	fig|502800.6.peg.325		SSU ribosomal protein S11p (S14e)
Protein Processing	Protein Synthesis	Ribosome biogenesis	Ribosomal proteins, zinc requirement	SSU_ribosomal_protein_S14p_(S29e),_zinc-independent	SSU ribosomal protein S14p (S29e), zinc-independent	active	fig|502800.6.peg.315	rpsN	SSU ribosomal protein S14p (S29e) @ SSU ribosomal protein S14p (S29e), zinc-independent
Protein Processing	Protein Synthesis	Ribosome biogenesis	Ribosomal proteins, zinc requirement	SSU_ribosomal_protein_S14p_(S29e)	SSU ribosomal protein S14p (S29e)	active	fig|502800.6.peg.315	rpsN	SSU ribosomal protein S14p (S29e) @ SSU ribosomal protein S14p (S29e), zinc-independent
Protein Processing	Protein Synthesis	Ribosome biogenesis	Ribosome activity modulation	Ribosome_hibernation_promoting_factor_Hpf	Ribosome hibernation promoting factor Hpf	active	fig|502800.6.peg.534		Ribosome hibernation promoting factor Hpf
Protein Processing	Protein Synthesis	Ribosome biogenesis	Ribosome LSU, bacterial	LSU_ribosomal_protein_L11p_(L12e)	LSU ribosomal protein L11p (L12e)	active	fig|502800.6.peg.352	rplK	LSU ribosomal protein L11p (L12e)
Protein Processing	Protein Synthesis	Ribosome biogenesis	Ribosome LSU, bacterial	LSU_ribosomal_protein_L15p_(L27Ae)	LSU ribosomal protein L15p (L27Ae)	active	fig|502800.6.peg.321	rplO	LSU ribosomal protein L15p (L27Ae)
Protein Processing	Protein Synthesis	Ribosome biogenesis	Ribosome LSU, bacterial	LSU_ribosomal_protein_L23p_(L23Ae)	LSU ribosomal protein L23p (L23Ae)	active	fig|502800.6.peg.304	rplW	LSU ribosomal protein L23p (L23Ae)
Protein Processing	Protein Synthesis	Ribosome biogenesis	Ribosome LSU, bacterial	LSU_ribosomal_protein_L3p_(L3e)	LSU ribosomal protein L3p (L3e)	active	fig|502800.6.peg.302	rplC	LSU ribosomal protein L3p (L3e)
Protein Processing	Protein Synthesis	Ribosome biogenesis	Ribosome LSU, bacterial	LSU_ribosomal_protein_L4p_(L1e)	LSU ribosomal protein L4p (L1e)	active	fig|502800.6.peg.303	rplD	LSU ribosomal protein L4p (L1e)
Protein Processing	Protein Synthesis	Ribosome biogenesis	Ribosome LSU, bacterial	LSU_ribosomal_protein_L16p_(L10e)	LSU ribosomal protein L16p (L10e)	active	fig|502800.6.peg.309	rplP	LSU ribosomal protein L16p (L10e)
Protein Processing	Protein Synthesis	Ribosome biogenesis	Ribosome LSU, bacterial	LSU_ribosomal_protein_L6p_(L9e)	LSU ribosomal protein L6p (L9e)	active	fig|502800.6.peg.317	rplF	LSU ribosomal protein L6p (L9e)
Protein Processing	Protein Synthesis	Ribosome biogenesis	Ribosome LSU, bacterial	LSU_ribosomal_protein_L21p	LSU ribosomal protein L21p	active	fig|502800.6.peg.4068	rplU	LSU ribosomal protein L21p
Protein Processing	Protein Synthesis	Translation	Translation elongation factors, bacterial	Translation_elongation_factor_Tu	Translation elongation factor Tu	active	fig|502800.6.peg.297		Translation elongation factor Tu
Protein Processing	Protein Synthesis	Translation	Translation initiation factors, bacterial	Translation_initiation_factor_SUI1-related_protein	Translation initiation factor SUI1-related protein	active	fig|502800.6.peg.2185		Translation initiation factor SUI1-related protein
Protein Processing	Protein Synthesis	Translation	Translation initiation factors, bacterial	Translation_initiation_factor_3	Translation initiation factor 3	active	fig|502800.6.peg.1967		Translation initiation factor 3
Protein Processing	Protein Synthesis	Translation	Translation termination factors, bacterial	Peptide_deformylase_(EC_3.5.1.88)	Peptide deformylase (EC 3.5.1.88)	active	fig|502800.6.peg.335	def	Peptide deformylase (EC 3.5.1.88)
Protein Processing	Protein Synthesis	Aminoacyl-tRNA-synthetases	tRNA aminoacylation, Cys	Cysteinyl-tRNA_synthetase_(EC_6.1.1.16)	Cysteinyl-tRNA synthetase (EC 6.1.1.16)	active	fig|502800.6.peg.3401	cysS	Cysteinyl-tRNA synthetase (EC 6.1.1.16)
Protein Processing	Protein Synthesis	Aminoacyl-tRNA-synthetases	tRNA aminoacylation, Phe	Phenylalanyl-tRNA_synthetase_alpha_chain_(EC_6.1.1.20)	Phenylalanyl-tRNA synthetase alpha chain (EC 6.1.1.20)	active	fig|502800.6.peg.1971		Phenylalanyl-tRNA synthetase alpha chain (EC 6.1.1.20)
Protein Processing	Protein Synthesis		Universal GTPases	Translation_elongation_factor_Tu	Translation elongation factor Tu	active	fig|502800.6.peg.297		Translation elongation factor Tu
RNA Processing	RNA Processing	RNA processing and modification	ATP-dependent RNA helicases, bacterial	DEAD-box_ATP-dependent_RNA_helicase_DeaD_(=_CshA)_(EC_3.6.4.13)	DEAD-box ATP-dependent RNA helicase DeaD (= CshA) (EC 3.6.4.13)	active	fig|502800.6.peg.4034		DEAD-box ATP-dependent RNA helicase DeaD (= CshA) (EC 3.6.4.13)
RNA Processing	RNA Processing	Transcription	RNA polymerase, bacterial	DNA-directed_RNA_polymerase_alpha_subunit_(EC_2.7.7.6)	DNA-directed RNA polymerase alpha subunit (EC 2.7.7.6)	active	fig|502800.6.peg.327		DNA-directed RNA polymerase alpha subunit (EC 2.7.7.6)
RNA Processing	RNA Processing	RNA processing and modification	RNA processing and degradation, bacterial	Ribonuclease_E_inhibitor_RraB	Ribonuclease E inhibitor RraB	active	fig|502800.6.peg.3988		Ribonuclease E inhibitor RraB
RNA Processing	RNA Processing	RNA processing and modification	RNA processing and degradation, bacterial	Polyribonucleotide_nucleotidyltransferase_(EC_2.7.7.8)	Polyribonucleotide nucleotidyltransferase (EC 2.7.7.8)	active	fig|502800.6.peg.4036		Polyribonucleotide nucleotidyltransferase (EC 2.7.7.8)
Stress Response, Defense, Virulence	Stress Response, Defense and Virulence	Resistance to antibiotics and toxic compounds	Antibiotic targets in cell wall biosynthesis	D-alanine--D-alanine_ligase_(EC_6.3.2.4)	D-alanine--D-alanine ligase (EC 6.3.2.4)	active	fig|502800.6.peg.3801	ddl	D-alanine--D-alanine ligase (EC 6.3.2.4)
Stress Response, Defense, Virulence	Stress Response, Defense and Virulence	Resistance to antibiotics and toxic compounds	Antibiotic targets in protein synthesis	Translation_elongation_factor_Tu	Translation elongation factor Tu	active	fig|502800.6.peg.297		Translation elongation factor Tu
Stress Response, Defense, Virulence	Stress Response, Defense and Virulence	Resistance to antibiotics and toxic compounds	Antibiotic targets in protein synthesis	SSU_ribosomal_protein_S12p_(S23e)	SSU ribosomal protein S12p (S23e)	active	fig|502800.6.peg.294	rpsL	SSU ribosomal protein S12p (S23e)
Stress Response, Defense, Virulence	Stress Response, Defense and Virulence	Resistance to antibiotics and toxic compounds	Antibiotic targets in protein synthesis	SSU_ribosomal_protein_S10p_(S20e)	SSU ribosomal protein S10p (S20e)	active	fig|502800.6.peg.301		SSU ribosomal protein S10p (S20e)
Stress Response, Defense, Virulence	Stress Response, Defense and Virulence	Resistance to antibiotics and toxic compounds	Arsenic resistance	Lactoylglutathione_lyase_(EC_4.4.1.5)	Lactoylglutathione lyase (EC 4.4.1.5)	active	fig|502800.6.peg.2017		Lactoylglutathione lyase (EC 4.4.1.5)
Stress Response, Defense, Virulence	Stress Response, Defense and Virulence	Stress Response: Osmotic stress	Choline uptake and conversion to betaine clusters	Transcriptional_regulator_BetI,_TetR_family	Transcriptional regulator BetI, TetR family	active	fig|502800.6.peg.3160		Transcriptional regulator BetI, TetR family
Stress Response, Defense, Virulence	Stress Response, Defense and Virulence	Stress Response: Heat/cold shock	Cold shock proteins of CSP family	Cold_shock_protein_of_CSP_family_=>_CspC_(naming_convention_as_in_E.coli)	Cold shock protein of CSP family => CspC (naming convention as in E.coli)	active	fig|502800.6.peg.2669		Cold shock protein of CSP family => CspC (naming convention as in E.coli)
Stress Response, Defense, Virulence	Stress Response, Defense and Virulence	Stress Response	Glutathione: Non-redox reactions	Lactoylglutathione_lyase_(EC_4.4.1.5)	Lactoylglutathione lyase (EC 4.4.1.5)	active	fig|502800.6.peg.2017		Lactoylglutathione lyase (EC 4.4.1.5)
Stress Response, Defense, Virulence	Stress Response, Defense and Virulence	Stress Response	Glutathione: Non-redox reactions	Glutathione_S-transferase_(EC_2.5.1.18)	Glutathione S-transferase (EC 2.5.1.18)	active	fig|502800.6.peg.2032		Glutathione S-transferase (EC 2.5.1.18)
Stress Response, Defense, Virulence	Stress Response, Defense and Virulence	Stress Response: Heat/cold shock	Heat shock dnaK gene cluster extended	RNA_polymerase_sigma_factor_RpoH	RNA polymerase sigma factor RpoH	active	fig|502800.6.peg.4298		RNA polymerase sigma factor RpoH
Stress Response, Defense, Virulence	Stress Response, Defense and Virulence	Stress Response: Heat/cold shock	Heat shock dnaK gene cluster extended	Chaperone_protein_DnaK	Chaperone protein DnaK	active	fig|502800.6.peg.3892	dnaK	Chaperone protein DnaK
Stress Response, Defense, Virulence	Stress Response, Defense and Virulence		Hfl operon	HflC_protein	HflC protein	active	fig|502800.6.peg.4108		HflC protein
Stress Response, Defense, Virulence	Stress Response, Defense and Virulence		Hfl operon	SSU_ribosomal_protein_S1p	SSU ribosomal protein S1p	active	fig|502800.6.peg.2881	rpsA	SSU ribosomal protein S1p
	Clustering-based subsystems	Cell Division	Cell division related cluster including coaD	RNA_polymerase_sigma_factor_RpoH	RNA polymerase sigma factor RpoH	active	fig|502800.6.peg.4298		RNA polymerase sigma factor RpoH
	Clustering-based subsystems	Lysine Biosynthesis	Peptidase clustering with DAP	Polyribonucleotide_nucleotidyltransferase_(EC_2.7.7.8)	Polyribonucleotide nucleotidyltransferase (EC 2.7.7.8)	likely	fig|502800.6.peg.4036		Polyribonucleotide nucleotidyltransferase (EC 2.7.7.8)
	Clustering-based subsystems	Clustering-based subsystems	Threonine synthase cluster	Ribosomal-protein-S5p-alanine_acetyltransferase_(EC_2.3.1.128)	Ribosomal-protein-S5p-alanine acetyltransferase (EC 2.3.1.128)	likely	fig|502800.6.peg.2332		Ribosomal-protein-S5p-alanine acetyltransferase (EC 2.3.1.128)
	Membrane Transport	Protein secretion system, Type VI	Type VI secretion system	T6SS_PAAR-repeat_protein	T6SS PAAR-repeat protein	active	fig|502800.6.peg.1026		hypothetical protein
	Membrane Transport	Protein secretion system, Type VI	Type VI secretion system	T6SS_component_Hcp	T6SS component Hcp	active	fig|502800.6.peg.3856		Putative cytoplasmic protein USSDB7A

## Sheet: up in lumen
Superclass	Class	Subclass	Subsystem Name	Role ID	Role Name	Active	PATRIC ID	Gene	Product
Cell Envelope	Cell Envelope, Capsule and Slime layer	Gram-Negative (Diderm) cell wall components	KDO2-Lipid A biosynthesis	3-deoxy-D-manno-octulosonic_acid_transferase_(EC_2.4.99.12)(EC_2.4.99.13)	3-deoxy-D-manno-octulosonic acid transferase (EC 2.4.99.12)(EC 2.4.99.13)	active	fig|502800.6.peg.4483		3-deoxy-D-manno-octulosonic acid transferase (EC 2.4.99.12)(EC 2.4.99.13)
Cell Envelope	Cell Envelope, Capsule and Slime layer	Gram-Negative (Diderm) cell wall components	Tol-Pal Cell Envelope Complex	Tol-Pal_system_protein_TolQ	Tol-Pal system protein TolQ	active	fig|502800.6.peg.3206		Tol-Pal system protein TolQ
Cellular Processes	Motility and Chemotaxis	Flagellum	Flagellum	Flagellar_regulatory_protein_FleQ	Flagellar regulatory protein FleQ	likely	fig|502800.6.peg.756		Flagellar regulatory protein FleQ
Cellular Processes	Motility and Chemotaxis	Flagellum	Flagellum	Flagellar_basal-body_rod_protein_FlgC	Flagellar basal-body rod protein FlgC	likely	fig|502800.6.peg.768	flgC	Flagellar basal-body rod protein FlgC
Cellular Processes	Microbial communities	Quorum sensing and biofilm formation	Quorum sensing in Yersinia	N-(3-oxohexanoyl)-L-homoserine_lactone-binding_transcriptional_activator	N-(3-oxohexanoyl)-L-homoserine lactone-binding transcriptional activator	active	fig|502800.6.peg.1788		Quorum-sensing transcriptional activator YpeR
Cellular Processes	Microbial communities	Quorum sensing and biofilm formation	Quorum sensing in Yersinia	N-(3-oxooctanoyl)-L-homoserine_lactone-binding_transcriptional_activator	N-(3-oxooctanoyl)-L-homoserine lactone-binding transcriptional activator	active	fig|502800.6.peg.845		Quorum-sensing transcriptional activator YspR
Cellular Processes	Microbial communities	Quorum sensing and biofilm formation	Quorum sensing in Yersinia	N-(3-oxooctanoyl)-L-homoserine_lactone-binding_transcriptional_activator	N-(3-oxooctanoyl)-L-homoserine lactone-binding transcriptional activator	active	fig|502800.6.peg.1788		Quorum-sensing transcriptional activator YpeR
Cellular Processes	Microbial communities	Quorum sensing and biofilm formation	Quorum sensing in Yersinia	N-(3-oxohexanoyl)-L-homoserine_lactone-binding_transcriptional_activator	N-(3-oxohexanoyl)-L-homoserine lactone-binding transcriptional activator	active	fig|502800.6.peg.845		Quorum-sensing transcriptional activator YspR
DNA Processing	DNA Processing	DNA recombination	RuvABC plus a hypothetical	Holliday_junction_ATP-dependent_DNA_helicase_RuvB_(EC_3.6.4.12)	Holliday junction ATP-dependent DNA helicase RuvB (EC 3.6.4.12)	active	fig|502800.6.peg.2312	ruvB	Holliday junction ATP-dependent DNA helicase RuvB (EC 3.6.4.12)
Energy	Respiration	Sodium Ion-Coupled Energetics	Na-translocating NADH-quinone oxidoreductase	Na(+)-translocating_NADH-quinone_reductase_subunit_E_(EC_1.6.5.8)	Na(+)-translocating NADH-quinone reductase subunit E (EC 1.6.5.8)	active	fig|502800.6.peg.2439		Na(+)-translocating NADH-quinone reductase subunit E (EC 1.6.5.8)
Energy	Energy and Precursor Metabolites Generation	Central Metabolism	Pentose phosphate pathway	Transketolase,_C-terminal_section_(EC_2.2.1.1)	Transketolase, C-terminal section (EC 2.2.1.1)	active	fig|502800.6.peg.3653		Transketolase, C-terminal section (EC 2.2.1.1)
Energy	Respiration	Electron donating reactions	Succinate dehydrogenase and Fumarate reductase cpmlexes	Succinate_dehydrogenase_cytochrome_b-556_subunit	Succinate dehydrogenase cytochrome b-556 subunit	active	fig|502800.6.peg.3219	sdhC	Succinate dehydrogenase cytochrome b-556 subunit
Membrane Transport	Membrane Transport	ABC transporters	Dpp dipeptide ABC transport system	Oligopeptide_ABC_transporter,_periplasmic_oligopeptide-binding_protein_OppA_(TC_3.A.1.5.1)	Oligopeptide ABC transporter, periplasmic oligopeptide-binding protein OppA (TC 3.A.1.5.1)	active	fig|502800.6.peg.2237		Oligopeptide ABC transporter, periplasmic oligopeptide-binding protein OppA (TC 3.A.1.5.1)
Membrane Transport	Membrane Transport	Protein secretion system, Type II	General Secretion Pathway	General_secretion_pathway_protein_F	General secretion pathway protein F	active	fig|502800.6.peg.1080		General secretion pathway protein F
Membrane Transport	Membrane Transport	Protein secretion system, Type II	General Secretion Pathway	General_secretion_pathway_protein_C	General secretion pathway protein C	active	fig|502800.6.peg.1077		General secretion pathway protein C
Membrane Transport	Membrane Transport	Protein secretion system, Type II	General Secretion Pathway	General_secretion_pathway_protein_D	General secretion pathway protein D	active	fig|502800.6.peg.1078		General secretion pathway protein D
Membrane Transport	Membrane Transport	Protein secretion system, Type II	General Secretion Pathway	General_secretion_pathway_protein_K	General secretion pathway protein K	active	fig|502800.6.peg.1085		General secretion pathway protein K
Membrane Transport	Membrane Transport		Lpt lipopolysaccharide transport system	Lipopolysaccharide_export_system_permease_protein_LptF	Lipopolysaccharide export system permease protein LptF	active	fig|502800.6.peg.3981		Lipopolysaccharide export system permease protein LptF
Membrane Transport	Membrane Transport	Multidrug efflux systems	Tripartite multidrug efflux systems (of MFS type) EmrKY-TolC and EmrAB-TolC	Multidrug_efflux_system_EmrAB-OMF,_membrane_fusion_component_EmrA	Multidrug efflux system EmrAB-OMF, membrane fusion component EmrA	active	fig|502800.6.peg.3604		Multidrug efflux system EmrAB-OMF, membrane fusion component EmrA
Membrane Transport	Membrane Transport	Cation transporters	Trk and Ktr potassium uptake systems	Trk_potassium_uptake_system_protein_TrkA	Trk potassium uptake system protein TrkA	active	fig|502800.6.peg.332	trkA	Trk potassium uptake system protein TrkA
Membrane Transport	Membrane Transport	Protein secretion system	Two partner secretion pathway (TPS)	Putative_large_exoprotein_involved_in_heme_utilization_or_adhesion_of_ShlA/HecA/FhaA_family	Putative large exoprotein involved in heme utilization or adhesion of ShlA/HecA/FhaA family	active	fig|502800.6.peg.619		Putative large exoprotein involved in heme utilization or adhesion of ShlA/HecA/FhaA family
Membrane Transport	Membrane Transport	Protein secretion system, Type II	Widespread colonization island	Flp_pilus_assembly_protein_TadB	Flp pilus assembly protein TadB	active	fig|502800.6.peg.727		Flp pilus assembly protein TadB
Metabolism	Amino Acids and Derivatives	Arginine; urea cycle, creatine, polyamines	Arginine succinyltransferase pathway	Succinylornithine_transaminase_(EC_2.6.1.81)	Succinylornithine transaminase (EC 2.6.1.81)	active	fig|502800.6.peg.2407		Succinylornithine transaminase (EC 2.6.1.81)
Metabolism	Amino Acids and Derivatives	Glutamine, glutamate, aspartate, asparagine; ammonia assimilation	Aspartate to Homoserine module	Aspartokinase_(EC_2.7.2.4)	Aspartokinase (EC 2.7.2.4)	active	fig|502800.6.peg.3903	thrA	Aspartokinase (EC 2.7.2.4) / Homoserine dehydrogenase (EC 1.1.1.3)
Metabolism	Amino Acids and Derivatives	Glutamine, glutamate, aspartate, asparagine; ammonia assimilation	Aspartate to Homoserine module	Homoserine_dehydrogenase_(EC_1.1.1.3)	Homoserine dehydrogenase (EC 1.1.1.3)	active	fig|502800.6.peg.3903	thrA	Aspartokinase (EC 2.7.2.4) / Homoserine dehydrogenase (EC 1.1.1.3)
Metabolism	Amino Acids and Derivatives	Lysine, threonine, methionine, and cysteine	Aspartate to Threonine Module	Homoserine_dehydrogenase_(EC_1.1.1.3)	Homoserine dehydrogenase (EC 1.1.1.3)	active	fig|502800.6.peg.3903	thrA	Aspartokinase (EC 2.7.2.4) / Homoserine dehydrogenase (EC 1.1.1.3)
Metabolism	Amino Acids and Derivatives	Lysine, threonine, methionine, and cysteine	Aspartate to Threonine Module	Aspartokinase_(EC_2.7.2.4)	Aspartokinase (EC 2.7.2.4)	active	fig|502800.6.peg.3903	thrA	Aspartokinase (EC 2.7.2.4) / Homoserine dehydrogenase (EC 1.1.1.3)
Metabolism	Cofactors, Vitamins, Prosthetic Groups	Biotin	Biotin biosynthesis	Biotin--protein_ligase_(EC_6.3.4.9)(EC_6.3.4.10)(EC_6.3.4.11)(EC_6.3.4.15)	Biotin--protein ligase (EC 6.3.4.9)(EC 6.3.4.10)(EC 6.3.4.11)(EC 6.3.4.15)	active	fig|502800.6.peg.346		Biotin operon repressor / Biotin--protein ligase (EC 6.3.4.9)(EC 6.3.4.10)(EC 6.3.4.11)(EC 6.3.4.15)
Metabolism	Cofactors, Vitamins, Prosthetic Groups	Biotin	Biotin biosynthesis	Biotin_operon_repressor	Biotin operon repressor	active	fig|502800.6.peg.346		Biotin operon repressor / Biotin--protein ligase (EC 6.3.4.9)(EC 6.3.4.10)(EC 6.3.4.11)(EC 6.3.4.15)
Metabolism	Cofactors, Vitamins, Prosthetic Groups	Biotin	Biotin synthesis & utilization	Biotin--protein_ligase_(EC_6.3.4.9)(EC_6.3.4.10)(EC_6.3.4.11)(EC_6.3.4.15)	Biotin--protein ligase (EC 6.3.4.9)(EC 6.3.4.10)(EC 6.3.4.11)(EC 6.3.4.15)	active	fig|502800.6.peg.346		Biotin operon repressor / Biotin--protein ligase (EC 6.3.4.9)(EC 6.3.4.10)(EC 6.3.4.11)(EC 6.3.4.15)
Metabolism	Cofactors, Vitamins, Prosthetic Groups	Biotin	Biotin synthesis & utilization	Biotin_operon_repressor	Biotin operon repressor	active	fig|502800.6.peg.346		Biotin operon repressor / Biotin--protein ligase (EC 6.3.4.9)(EC 6.3.4.10)(EC 6.3.4.11)(EC 6.3.4.15)
Metabolism	Cofactors, Vitamins, Prosthetic Groups	Biotin	Biotin synthesis cluster	Biotin_operon_repressor	Biotin operon repressor	active	fig|502800.6.peg.346		Biotin operon repressor / Biotin--protein ligase (EC 6.3.4.9)(EC 6.3.4.10)(EC 6.3.4.11)(EC 6.3.4.15)
Metabolism	Cofactors, Vitamins, Prosthetic Groups	Biotin	Biotin synthesis cluster	Biotin--protein_ligase_(EC_6.3.4.9)(EC_6.3.4.10)(EC_6.3.4.11)(EC_6.3.4.15)	Biotin--protein ligase (EC 6.3.4.9)(EC 6.3.4.10)(EC 6.3.4.11)(EC 6.3.4.15)	active	fig|502800.6.peg.346		Biotin operon repressor / Biotin--protein ligase (EC 6.3.4.9)(EC 6.3.4.10)(EC 6.3.4.11)(EC 6.3.4.15)
Metabolism	Amino Acids and Derivatives	Aromatic amino acids and derivatives	Chorismate Synthesis	Chorismate_mutase_I_(EC_5.4.99.5)	Chorismate mutase I (EC 5.4.99.5)	active	fig|502800.6.peg.3626	tyrA	Chorismate mutase I (EC 5.4.99.5) / Cyclohexadienyl dehydrogenase (EC 1.3.1.12)(EC 1.3.1.43)
Metabolism	Amino Acids and Derivatives	Aromatic amino acids and derivatives	Chorismate Synthesis	Cyclohexadienyl_dehydrogenase_(EC_1.3.1.12)(EC_1.3.1.43)	Cyclohexadienyl dehydrogenase (EC 1.3.1.12)(EC 1.3.1.43)	active	fig|502800.6.peg.3626	tyrA	Chorismate mutase I (EC 5.4.99.5) / Cyclohexadienyl dehydrogenase (EC 1.3.1.12)(EC 1.3.1.43)
Metabolism	Amino Acids and Derivatives	Aromatic amino acids and derivatives	Chorismate Synthesis	2-keto-3-deoxy-D-arabino-heptulosonate-7-phosphate_synthase_I_alpha_(EC_2.5.1.54)	2-keto-3-deoxy-D-arabino-heptulosonate-7-phosphate synthase I alpha (EC 2.5.1.54)	active	fig|502800.6.peg.3197		2-keto-3-deoxy-D-arabino-heptulosonate-7-phosphate synthase I alpha (EC 2.5.1.54)
Metabolism	Amino Acids and Derivatives	Lysine, threonine, methionine, and cysteine	Cysteine synthesis	Sulfate_transport_system_permease_protein_CysT	Sulfate transport system permease protein CysT	active	fig|502800.6.peg.1498		Sulfate transport system permease protein CysT
Metabolism	Amino Acids and Derivatives	Alanine, serine, and glycine	D-3-phosphoglycerate to phosphoserine module	D-3-phosphoglycerate_dehydrogenase_(EC_1.1.1.95)	D-3-phosphoglycerate dehydrogenase (EC 1.1.1.95)	active	fig|502800.6.peg.1698		D-3-phosphoglycerate dehydrogenase (EC 1.1.1.95)
Metabolism	Carbohydrates	Monosaccharides	D-Galacturonate and D-Glucuronate Utilization	Hexuronate_transporter	Hexuronate transporter	active	fig|502800.6.peg.588		Hexuronate transporter
Metabolism	Metabolite damage and its repair or mitigation		D-tyrosyl-tRNA(Tyr) deacylase	D-aminoacyl-tRNA_deacylase_(EC_3.1.1.96)	D-aminoacyl-tRNA deacylase (EC 3.1.1.96)	active	fig|502800.6.peg.4520		D-aminoacyl-tRNA deacylase (EC 3.1.1.96)
Metabolism	Amino Acids and Derivatives	Lysine, threonine, methionine, and cysteine	Diaminopimelate Synthesis	Aspartokinase_(EC_2.7.2.4)	Aspartokinase (EC 2.7.2.4)	active	fig|502800.6.peg.3903	thrA	Aspartokinase (EC 2.7.2.4) / Homoserine dehydrogenase (EC 1.1.1.3)
Metabolism	Carbohydrates	Di- and oligosaccharides	Galactose utilization	Galactose/methyl_galactoside_ABC_transport_system,_permease_protein_MglC_(TC_3.A.1.2.3)	Galactose/methyl galactoside ABC transport system, permease protein MglC (TC 3.A.1.2.3)	active	fig|502800.6.peg.2764	mglC	Galactose/methyl galactoside ABC transport system, permease protein MglC (TC 3.A.1.2.3)
Metabolism	Carbohydrates	Monosaccharides	GDP-fucose to mannose-1P module	GDP-L-fucose_synthetase_(EC_1.1.1.271)	GDP-L-fucose synthetase (EC 1.1.1.271)	active	fig|502800.6.peg.3432		GDP-L-fucose synthetase (EC 1.1.1.271)
Metabolism	Phosphate Metabolism		High affinity phosphate transporter and control of PHO regulon	Phosphate_transport_system_permease_protein_PstA_(TC_3.A.1.7.1)	Phosphate transport system permease protein PstA (TC 3.A.1.7.1)	active	fig|502800.6.peg.1430		Phosphate transport system permease protein PstA (TC 3.A.1.7.1)
Metabolism	Amino Acids and Derivatives	Histidine Metabolism	Histidine Biosynthesis	Phosphoribosylformimino-5-aminoimidazole_carboxamide_ribotide_isomerase_(EC_5.3.1.16)	Phosphoribosylformimino-5-aminoimidazole carboxamide ribotide isomerase (EC 5.3.1.16)	active	fig|502800.6.peg.2731		Phosphoribosylformimino-5-aminoimidazole carboxamide ribotide isomerase (EC 5.3.1.16)
Metabolism	Secondary Metabolism	Metabolism of Aromatic Compounds	Homoprotocatechuate degradative cluster	4-hydroxyphenylacetate_3-monooxygenase,_reductase_component_(EC_1.6.8.-)	4-hydroxyphenylacetate 3-monooxygenase, reductase component (EC 1.6.8.-)	active	fig|502800.6.peg.2646		4-hydroxyphenylacetate 3-monooxygenase, reductase component (EC 1.6.8.-)
Metabolism	Secondary Metabolism	Metabolism of Aromatic Compounds	Homoprotocatechuate degradative cluster	Homoprotocatechuate_degradative_operon_repressor	Homoprotocatechuate degradative operon repressor	active	fig|502800.6.peg.2656		Homoprotocatechuate degradative operon repressor
Metabolism	Amino Acids and Derivatives	Lysine, threonine, methionine, and cysteine	Lysine DAP biosynthetic pathway	Aspartokinase_(EC_2.7.2.4)	Aspartokinase (EC 2.7.2.4)	active	fig|502800.6.peg.3903	thrA	Aspartokinase (EC 2.7.2.4) / Homoserine dehydrogenase (EC 1.1.1.3)
Metabolism	Cofactors, Vitamins, Prosthetic Groups	Quinone cofactors	Menaquinone biosynthesis from chorismate via 1,4-dihydroxy-2-naphthoate	2-succinyl-6-hydroxy-2,4-cyclohexadiene-1-carboxylate_synthase_(EC_4.2.99.20)	2-succinyl-6-hydroxy-2,4-cyclohexadiene-1-carboxylate synthase (EC 4.2.99.20)	active	fig|502800.6.peg.1711		2-succinyl-6-hydroxy-2,4-cyclohexadiene-1-carboxylate synthase (EC 4.2.99.20)
Metabolism	Carbohydrates	CO2 fixation	Methylenetetrahydrofolate reductase	5,10-methylenetetrahydrofolate_reductase_(EC_1.5.1.20)	5,10-methylenetetrahydrofolate reductase (EC 1.5.1.20)	active	fig|502800.6.peg.4201		5,10-methylenetetrahydrofolate reductase (EC 1.5.1.20)
Metabolism	Carbohydrates	CO2 fixation	Methylenetetrahydrofolate reductase	5,10-methylenetetrahydrofolate_reductase_(EC_1.5.1.20)	5,10-methylenetetrahydrofolate reductase (EC 1.5.1.20)	active	fig|502800.6.peg.4420	metF	5,10-methylenetetrahydrofolate reductase (EC 1.5.1.20)
Metabolism	Cofactors, Vitamins, Prosthetic Groups	Folate and pterines	Molybdenum cofactor biosynthesis	Molybdopterin_synthase_catalytic_subunit_MoaE_(EC_2.8.1.12)	Molybdopterin synthase catalytic subunit MoaE (EC 2.8.1.12)	active	fig|502800.6.peg.3164	moaE	Molybdopterin synthase catalytic subunit MoaE (EC 2.8.1.12)
Metabolism	Carbohydrates	Amino sugars and nucleotide sugars	N-acetylneuraminate utilization	Sialic_acid_transporter_(permease)_NanT	Sialic acid transporter (permease) NanT	active	fig|502800.6.peg.1496		Sialic acid transporter (permease) NanT
Metabolism	Carbohydrates	C-1 compound metabolism	One-carbon metabolism by tetrahydropterines	5,10-methylenetetrahydrofolate_reductase_(EC_1.5.1.20)	5,10-methylenetetrahydrofolate reductase (EC 1.5.1.20)	active	fig|502800.6.peg.4201		5,10-methylenetetrahydrofolate reductase (EC 1.5.1.20)
Metabolism	Carbohydrates	C-1 compound metabolism	One-carbon metabolism by tetrahydropterines	5,10-methylenetetrahydrofolate_reductase_(EC_1.5.1.20)	5,10-methylenetetrahydrofolate reductase (EC 1.5.1.20)	active	fig|502800.6.peg.4420	metF	5,10-methylenetetrahydrofolate reductase (EC 1.5.1.20)
Metabolism	Amino Acids and Derivatives	Aromatic amino acids and derivatives	Phenylalanine and Tyrosine synthesis 1	Chorismate_mutase_I_(EC_5.4.99.5)	Chorismate mutase I (EC 5.4.99.5)	active	fig|502800.6.peg.3626	tyrA	Chorismate mutase I (EC 5.4.99.5) / Cyclohexadienyl dehydrogenase (EC 1.3.1.12)(EC 1.3.1.43)
Metabolism	Amino Acids and Derivatives	Aromatic amino acids and derivatives	Phenylalanine and Tyrosine synthesis 1	Cyclohexadienyl_dehydrogenase_(EC_1.3.1.12)(EC_1.3.1.43)	Cyclohexadienyl dehydrogenase (EC 1.3.1.12)(EC 1.3.1.43)	active	fig|502800.6.peg.3626	tyrA	Chorismate mutase I (EC 5.4.99.5) / Cyclohexadienyl dehydrogenase (EC 1.3.1.12)(EC 1.3.1.43)
Metabolism	Cofactors, Vitamins, Prosthetic Groups	Pyridoxine	Pyridoxin (Vitamin B6) Biosynthesis	D-3-phosphoglycerate_dehydrogenase_(EC_1.1.1.95)	D-3-phosphoglycerate dehydrogenase (EC 1.1.1.95)	active	fig|502800.6.peg.1698		D-3-phosphoglycerate dehydrogenase (EC 1.1.1.95)
Metabolism	Iron acquisition and metabolism	Siderophores	Siderophore [Alcaligin-like]	Iron-siderophore_[Alcaligin-like]_receptor	Iron-siderophore [Alcaligin-like] receptor	active	fig|502800.6.peg.2739		Iron-siderophore [Alcaligin-like] receptor @ TonB-dependent siderophore receptor
Metabolism	Iron acquisition and metabolism	Siderophores	Siderophore Aerobactin	Ferric_hydroxamate_ABC_transporter_(TC_3.A.1.14.3),_permease_component_FhuB	Ferric hydroxamate ABC transporter (TC 3.A.1.14.3), permease component FhuB	active	fig|502800.6.peg.3741		Ferric hydroxamate ABC transporter (TC 3.A.1.14.3), permease component FhuB
Metabolism	Iron acquisition and metabolism	Siderophores	Siderophore assembly kit	TonB-dependent_siderophore_receptor	TonB-dependent siderophore receptor	active	fig|502800.6.peg.2739		Iron-siderophore [Alcaligin-like] receptor @ TonB-dependent siderophore receptor
Protein Processing	Protein Synthesis	Aminoacyl-tRNA-synthetases	tRNA aminoacylation, Tyr	D-aminoacyl-tRNA_deacylase_(EC_3.1.1.96)	D-aminoacyl-tRNA deacylase (EC 3.1.1.96)	active	fig|502800.6.peg.4520		D-aminoacyl-tRNA deacylase (EC 3.1.1.96)
Regulation And Cell Signaling	Regulation and Cell signaling		Stringent Response, (p)ppGpp metabolism	Guanosine-5'-triphosphate,3'-diphosphate_pyrophosphatase_(EC_3.6.1.40)	Guanosine-5'-triphosphate,3'-diphosphate pyrophosphatase (EC 3.6.1.40)	active	fig|502800.6.peg.4362		Guanosine-5'-triphosphate,3'-diphosphate pyrophosphatase (EC 3.6.1.40) @ Exopolyphosphatase (EC 3.6.1.11)
Regulation And Cell Signaling	Regulation and Cell signaling		Stringent Response, (p)ppGpp metabolism	D-aminoacyl-tRNA_deacylase_(EC_3.1.1.96)	D-aminoacyl-tRNA deacylase (EC 3.1.1.96)	active	fig|502800.6.peg.4520		D-aminoacyl-tRNA deacylase (EC 3.1.1.96)
RNA Processing	RNA Processing	RNA processing and modification	Queuosine and archaeosine	Epoxyqueuosine_reductase_(EC_1.17.99.6)_QueG	Epoxyqueuosine reductase (EC 1.17.99.6) QueG	active	fig|502800.6.peg.4117		Epoxyqueuosine reductase (EC 1.17.99.6)
Stress Response, Defense, Virulence	Stress Response, Defense and Virulence	Resistance to antibiotics and toxic compounds	Bicyclomycin resistance cluster	ATP-dependent_RNA_helicase_YejH	ATP-dependent RNA helicase YejH	active	fig|502800.6.peg.3027		ATP-dependent RNA helicase YejH
Stress Response, Defense, Virulence	Stress Response, Defense and Virulence	Stress Response: Osmotic stress	Hyperosmotic potassium uptake	Trk_potassium_uptake_system_protein_TrkA	Trk potassium uptake system protein TrkA	active	fig|502800.6.peg.332	trkA	Trk potassium uptake system protein TrkA
Stress Response, Defense, Virulence	Stress Response, Defense and Virulence	Resistance to antibiotics and toxic compounds	Inner membrane proteins of MarC family, not involved in antibiotic resistance	UPF0056_inner_membrane_protein_YchE	UPF0056 inner membrane protein YchE	active	fig|502800.6.peg.2238		UPF0056 inner membrane protein YchE
Stress Response, Defense, Virulence	Stress Response, Defense and Virulence	Resistance to antibiotics and toxic compounds	Resistance to Daptomycin	Glycerophosphoryl_diester_phosphodiesterase_(EC_3.1.4.46)	Glycerophosphoryl diester phosphodiesterase (EC 3.1.4.46)	active	fig|502800.6.peg.3562		Glycerophosphoryl diester phosphodiesterase (EC 3.1.4.46)
Stress Response, Defense, Virulence	Stress Response, Defense and Virulence	Resistance to antibiotics and toxic compounds	ZraPRS-based zinc resistance	Response_regulator_of_zinc_sigma-54-dependent_two-component_system	Response regulator of zinc sigma-54-dependent two-component system	active	fig|502800.6.peg.3151		Response regulator of zinc sigma-54-dependent two-component system
	Clustering-based subsystems	Cell Division	Cell division related cluster including coaD	Uncharacterized_ferredoxin-like_protein_YfhL	Uncharacterized ferredoxin-like protein YfhL	active	fig|502800.6.peg.1277		Uncharacterized ferredoxin-like protein YfhL
	Clustering-based subsystems	Lysine Biosynthesis	Peptidase clustering with DAP	Aspartokinase_(EC_2.7.2.4)	Aspartokinase (EC 2.7.2.4)	likely	fig|502800.6.peg.3903	thrA	Aspartokinase (EC 2.7.2.4) / Homoserine dehydrogenase (EC 1.1.1.3)
	Membrane Transport	Protein secretion system, Type VI	Type VI secretion system	T6SS_component_Hcp	T6SS component Hcp	active	fig|502800.6.peg.402		Hcp
	Membrane Transport	Protein secretion system, Type VI	Type VI secretion system	T6SS_component_TssB_(ImpB/VipA)	T6SS component TssB (ImpB/VipA)	active	fig|502800.6.peg.1578		Uncharacterized protein ImpB
	Membrane Transport	Protein secretion system, Type VI	Type VI secretion system	T6SS_secretion_lipoprotein_TssJ_(VasD)	T6SS secretion lipoprotein TssJ (VasD)	active	fig|502800.6.peg.1581		Type VI secretion lipoprotein/VasD
	Membrane Transport	Protein secretion system, Type VI	Type VI secretion system	T6SS_component_Hcp	T6SS component Hcp	active	fig|502800.6.peg.3309		putative membrane protein
