# Supplementary material for: 6S RNA facilitates bacterial virulence and adaptation at the epithelial barrier
Source: Research Square preprint supplement (doi:10.21203/rs.3.rs-7847320/v1), 2025-11-19
Supplement: Supplementary file 4 [file 6e314ebada73c5486c52e513.xlsx]

## Sheet: Sheet1
Gene	F-Primer	R-Primer
rpoC	5'-TTGCAGCACAGTCCATCG-3'	5'-CCGCATTGGTCACGAACT-3'
rpoB	5'-CAAACGTGGCGGTACTGT-3'	5'-ACACACGGCATCTGGTTG-3'
ssrA	5'-TCTCTGAGGTGTTTGCCAG-3'	5'-CGCAGGCTGTAACCCTTG-3'
yopE	5'-TCTACATCACTGCCCCTG-3'	5'-TCAATGATACGGCTGGCT-3'
yopD	5'-TATCTCGGTCACAGGTGC-3'	5'-TGCAAACCCATTTCTCGC-3'
yopH	5'-CGGCGGTGAAAAGCTAAA-3'	5'-TCTGCCAGCATACGGAAA-3'
