# Supplementary material for: 6S RNA facilitates bacterial virulence and adaptation at the epithelial barrier
Source: Research Square preprint supplement (doi:10.21203/rs.3.rs-7847320/v1), 2025-11-19
Supplement: Supplementary file 5 [file 86fe8893a441009484721263.xlsx]

## Sheet: Expression Browser view
Supplementary Table 1. Expression levels (TPM) of Yersinia pseudotuberculosis YPIII in low dose infected FVBn mouse (n=2).
Gene locus tag/name	Chromosome	Region	Mouse 1 Lumen (TPM)	Mouse 2 Lumen (TPM)	Mouse 1 Tissue (TPM)	Mouse 2 Tissue (TPM)
YPK_0001	NC_010465	37..1389	334.766	138.956	50.2447	158.72
YPK_0002	NC_010465	1394..2494	531.64	361.91	105.848	425.561
YPK_0003	NC_010465	2667..3752	89.8305	129.193	89.4253	151.004
YPK_0004	NC_010465	3772..6186	201.979	201.015	277.474	177.846
YPK_0005	NC_010465	6402..7211	163.453	523.107	587.491	414.554
YPK_0006	NC_010465	7529..7696	0	0	57.807	116.206
YPK_0007	NC_010465	complement(7806..8759)	211.824	155.893	335.935	233.289
YPK_0008	NC_010465	complement(8753..9715)	151.956	300.13	272.287	227.054
YPK_0009	NC_010465	9923..11224	321.119	71.1217	126.803	206.922
YPK_0010	NC_010465	complement(11264..11602)	287.776	132.44	114.591	276.426
YPK_0011	NC_010465	11970..12383	67.3264	745.575	93.8317	433.836
YPK_0012	NC_010465	12664..13128	539.48	820.701	125.311	411.444
YPK_0013	NC_010465	13501..15159	306.621	196.205	497.58	334.203
YPK_0014	NC_010465	complement(15272..16642)	233.801	167.832	240.842	216.443
YPK_0015	NC_010465	complement(16993..17436)	737.633	75.8398	612.442	175.879
YPK_0016	NC_010465	complement(17850..19913)	185.686	126.436	239.966	196.74
YPK_0017	NC_010465	complement(20183..21163)	518.537	140.161	227.693	294.531
YPK_0018	NC_010465	21718..22362	97.2318	126.165	271.021	254.248
YPK_0019	NC_010465	complement(22493..23152)	369.53	127.549	279.576	248.47
YPK_0020	NC_010465	complement(23510..23965)	489.002	209.225	362.055	333.94
YPK_0021	NC_010465	complement(23962..24534)	48.6442	58.7659	220.333	95.3985
YPK_0022	NC_010465	24881..25795	129.465	128.803	222.889	140.819
YPK_0023	NC_010465	25805..27874	279.404	244.006	328.411	256.529
YPK_0024	NC_010465	28022..28252	241.326	157.918	0	253.541
YPK_0025	NC_010465	28347..29066	329.058	190.969	526.044	281.993
YPK_0026	NC_010465	29548..31479	234.44	197.529	251.335	331.44
YPK_0027	NC_010465	31616..32779	209.527	212.143	300.358	147.594
YPK_0028	NC_010465	32986..33540	489.663	252.799	349.967	267.337
YPK_0029	NC_010465	33619..33741	0	0	157.912	63.4882
YPK_0030	NC_010465	33789..34145	351.342	526.63	108.813	10.937
YPK_0031	NC_010465	complement(34308..34784)	598.951	658.868	1079.06	654.847
YPK_0032	NC_010465	35145..35240	0	0	0	0
YPK_0033	NC_010465	complement(35316..35600)	146.701	98.4587	68.1515	246.602
YPK_0034	NC_010465	complement(35838..37787)	182.247	97.8528	189.251	180.209
YPK_0035	NC_010465	complement(38131..38754)	301.512	274.312	264.578	369.178
YPK_0036	NC_010465	complement(39189..40013)	168.928	68.026	141.259	89.9224
YPK_0037	NC_010465	40210..40797	71.1049	281.562	181.679	365.219
YPK_0038	NC_010465	40846..43257	222.453	205.918	306.003	160.26
YPK_0039	NC_010465	43270..44241	286.76	181.875	539.532	160.68
YPK_0040	NC_010465	44238..44912	216.791	203.7	172.65	306.577
YPK_0041	NC_010465	44912..45841	487.03	111.639	146.196	146.944
YPK_0042	NC_010465	46025..47413	285.955	111.112	258.696	174.284
YPK_0043	NC_010465	47410..49383	232.982	150.681	285.345	209.665
YPK_0044	NC_010465	50142..50474	544.07	244.373	262.475	187.605
YPK_0045	NC_010465	complement(50488..51036)	964.643	378.232	1061.38	376.939
YPK_0046	NC_010465	complement(51024..51209)	0	0	0	230.913
YPK_0047	NC_010465	51330..51533	0	0	95.2116	38.2796
YPK_0048	NC_010465	complement(51682..52911)	198.284	132.319	497.423	272.999
YPK_0049	NC_010465	53310..53477	0	66.8113	0	0
YPK_0050	NC_010465	53772..54764	252.626	203.461	498.782	235.923
YPK_0051	NC_010465	55655..56212	224.783	226.296	382.894	139.947
YPK_0052	NC_010465	56288..58786	387.591	154.957	240.944	228.115
YPK_0053	NC_010465	58879..59646	108.879	157.111	202.325	279.621
YPK_0054	NC_010465	59685..60671	670.706	261.559	432.938	482.626
YPK_0055	NC_010465	complement(60770..62224)	268.195	185.143	380.454	241.517
YPK_0056	NC_010465	complement(62348..63667)	311.461	110.542	198.646	162.689
YPK_0057	NC_010465	64130..65125	195.895	183.127	419.275	525.307
YPK_0058	NC_010465	65333..66865	122.729	115.318	259.736	168.101
YPK_0059	NC_010465	66852..68036	282.259	161.024	278.645	204.287
YPK_0060	NC_010465	68126..69319	233.443	218.563	528.688	238.719
YPK_0061	NC_010465	69706..70896	163.822	266.235	89.6956	406.516
YPK_0062	NC_010465	71077..72345	400.854	132.675	413.259	366.145
YPK_0063	NC_010465	complement(72381..73151)	126.532	47.3138	264.518	126.606
YPK_0064	NC_010465	complement(73144..74259)	81.1717	113.148	356.788	129.451
YPK_0065	NC_010465	complement(74300..75067)	127.026	84.036	290.842	167.773
YPK_0066	NC_010465	75549..75815	0	168.154	0	0
YPK_0067	NC_010465	75893..76648	0	118.776	25.692	185.93
YPK_0068	NC_010465	complement(76836..77594)	358.054	262.492	127.952	272.648
YPK_0069	NC_010465	complement(77591..78598)	373.301	256.11	597.339	375.733
YPK_0070	NC_010465	complement(78588..79547)	268.569	187.072	293.371	305.041
YPK_0071	NC_010465	complement(79557..80510)	102.26	161.776	162.878	188.268
YPK_0072	NC_010465	complement(81033..82277)	330.224	157.771	351.021	219.531
YPK_0073	NC_010465	complement(82279..83208)	262.247	250.434	386.375	218.317
YPK_0074	NC_010465	complement(83291..83839)	621.941	158.449	176.896	341.379
YPK_0075	NC_010465	complement(83832..84155)	602.197	259.822	359.688	1132.79
YPK_0076	NC_010465	84883..86574	350.061	170.819	367.341	286.147
YPK_0077	NC_010465	86571..88103	290.913	230.636	354.761	338.749
YPK_0078	NC_010465	88470..89873	213.416	171.882	214.43	330.939
YPK_0079	NC_010465	90341..91804	157.072	99.6693	225.542	192.026
YPK_0080	NC_010465	92315..94006	263.576	202.329	367.341	290.762
YPK_0081	NC_010465	94122..94712	47.1626	175.676	131.46	72.673
YPK_0082	NC_010465	94709..96238	273.266	157.727	260.245	273.061
YPK_0083	NC_010465	96333..97664	146.48	151.68	648.897	360.553
YPK_0085	NC_010465	98170..99561	605.72	266.093	474.416	294.522
YPK_0086	NC_010465	99670..101433	292.32	252.928	258.755	283.321
YPK_0087	NC_010465	101493..101699	67.3264	325.342	93.8317	264.074
YPK_0088	NC_010465	102102..103709	112.671	298.407	338.214	325.377
YPK_0089	NC_010465	103992..105011	204.949	209.08	361.804	233.506
YPK_0090	NC_010465	105022..105924	331.823	158.483	365.663	220.521
YPK_0091	NC_010465	105938..106918	142.065	171.625	108.896	79.6029
YPK_0092	NC_010465	106915..107991	200.573	190.198	504.966	290.03
YPK_0093	NC_010465	108109..109224	362.151	120.691	156.638	171.435
YPK_0094	NC_010465	109369..111555	423.768	165.516	279.758	223.167
YPK_0095	NC_010465	112196..112900	316.291	155.23	385.708	143.997
YPK_0096	NC_010465	113146..114864	299.972	153.444	293.777	243.039
YPK_0097	NC_010465	114989..115468	188.724	87.6898	40.4649	73.2098
YPK_0098	NC_010465	115940..117229	410.534	147.917	286.078	227.007
YPK_0099	NC_010465	complement(117291..117407)	0	47.9671	0	0
YPK_0100	NC_010465	117594..119093	190.466	336.729	388.463	216.05
YPK_0101	NC_010465	complement(119257..120201)	331.823	181.133	246.643	280.96
YPK_0102	NC_010465	complement(120480..120680)	0	139.606	386.531	38.851
YPK_0103	NC_010465	120899..121744	197.682	149.259	91.8353	212.303
YPK_0104	NC_010465	122049..124268	172.638	161.792	275.599	167.085
YPK_0105	NC_010465	complement(124273..125070)	227.037	221.532	97.3592	141.894
YPK_0106	NC_010465	complement(125074..126174)	272.149	214.087	379.29	269.522
YPK_0107	NC_010465	126853..130065	325.316	213.971	290.169	196.867
YPK_0108	NC_010465	130167..131036	504.599	54.8313	602.788	130.151
YPK_0109	NC_010465	131023..131526	414.778	66.8113	423.918	480.318
YPK_0110	NC_010465	131595..132101	398.58	99.6239	76.62	123.22
YPK_0111	NC_010465	complement(132347..133483)	196.117	71.5709	136.663	92.7196
YPK_0112	NC_010465	complement(133494..134762)	142.77	126.041	176.018	86.1518
YPK_0113	NC_010465	complement(134940..136067)	129.729	111.944	223.849	110.767
YPK_0114	NC_010465	complement(136278..137630)	216.31	261.319	236.868	366.5
YPK_0115	NC_010465	complement(137798..138640)	429.835	179.748	34.5608	254.744
YPK_0116	NC_010465	138969..141011	235.346	148.339	266.201	129.96
YPK_0117	NC_010465	141015..141785	180.76	214.732	125.961	172.184
YPK_0118	NC_010465	complement(141850..143184)	480.211	208.091	305.533	207.656
YPK_0119	NC_010465	complement(143432..144775)	171.096	171.204	86.7106	95.87
YPK_0120	NC_010465	complement(145022..145468)	436.492	853.749	477.975	550.302
YPK_0121	NC_010465	146159..146494	601.429	459.327	375.746	511.307
YPK_0122	NC_010465	complement(146641..148236)	218.304	203.95	529.391	354.734
YPK_0123	NC_010465	148262..149644	398.043	239.419	294.929	355.727
YPK_0124	NC_010465	complement(149780..152335)	179.932	116.371	174.778	238.304
YPK_0125	NC_010465	152524..154047	256.052	189.649	216.663	115.291
YPK_0126	NC_010465	154040..155032	168.418	127.163	215.161	121.893
YPK_0127	NC_010465	155063..156007	176.972	89.0817	369.965	280.96
YPK_0128	NC_010465	156082..156765	152.813	266.659	127.784	336.794
YPK_0129	NC_010465	156791..157651	283.263	84.7362	135.353	90.6974
YPK_0130	NC_010465	157661..158668	324.91	130.839	211.959	73.5972
YPK_0131	NC_010465	complement(158743..159480)	217.169	133.079	210.549	201.046
YPK_RS00640	NC_010465	complement(159480..159749)	0	41.5715	0	72.306
YPK_0132	NC_010465	159903..160115	196.29	210.785	227.971	238.304
YPK_0133	NC_010465	160244..160939	280.333	169.332	55.8137	196.348
YPK_0134	NC_010465	161125..162063	504.625	218.151	217.192	191.276
YPK_0135	NC_010465	complement(162155..163471)	105.82	123.578	309.709	145.271
YPK_0136	NC_010465	163688..164191	414.778	133.623	77.0761	286.642
YPK_0137	NC_010465	164373..164606	89.3369	95.9341	0	33.372
YPK_0138	NC_010465	164797..164937	197.682	79.6049	413.259	55.3833
YPK_0139	NC_010465	164992..165381	178.674	107.926	423.325	80.0928
YPK_0140	NC_010465	complement(165566..166159)	187.698	255.098	294.29	539.008
YPK_0141	NC_010465	166518..167621	145.172	205.88	237.512	222.813
YPK_RS00690	NC_010465	167869..168345	116.868	182.365	81.4389	294.681
YPK_0142	NC_010465	168356..168664	112.755	99.8926	0	101.088
YPK_0143	NC_010465	168671..168958	193.563	58.4599	0	67.7869
YPK_0144	NC_010465	169116..169259	0	38.9732	0	0
YPK_0145	NC_010465	170696..186709	129.236	78.6766	181.933	138.002
YPK_0146	NC_010465	complement(186934..188631)	274.956	211.53	217.338	262.141
YPK_0147	NC_010465	189137..191320	207.389	229.985	306.822	252.078
YPK_0148	NC_010465	191322..193310	322.314	177.76	190.423	190.417
YPK_0149	NC_010465	193320..194606	297.79	263.819	362.204	415.633
YPK_0150	NC_010465	194817..196247	194.781	252.958	176.451	259.21
YPK_0151	NC_010465	196560..199007	284.652	465.386	194.39	371.632
YPK_0152	NC_010465	complement(199169..200683)	262.173	101.871	141.026	154.635
YPK_0153	NC_010465	201082..201456	780.447	89.7943	258.976	655.96
YPK_0154	NC_010465	201765..202229	239.769	132.76	292.392	218.317
YPK_0155	NC_010465	202248..202664	116.974	201.876	978.145	421.352
YPK_0157	NC_010465	complement(203394..204152)	247.883	140.489	230.314	180.051
YPK_0158	NC_010465	complement(204187..205023)	732.627	305.081	382.894	387.187
YPK_0159	NC_010465	complement(205041..205370)	422.32	212.581	294.29	508.771
YPK_0160	NC_010465	complement(205745..208456)	231.248	181.07	193.372	246.192
YPK_0161	NC_010465	208774..211179	127.433	128.291	222.002	155.791
YPK_0162	NC_010465	211192..213288	405.403	218.116	203.772	227.159
YPK_0163	NC_010465	complement(213473..214048)	411.322	311.786	404.649	298.262
YPK_0164	NC_010465	complement(214108..214809)	99.2632	111.923	55.3367	94.554
YPK_0165	NC_010465	214896..215672	215.236	166.125	262.475	130.653
YPK_0166	NC_010465	215842..216111	309.701	228.643	1222.94	216.918
YPK_0167	NC_010465	complement(216249..216506)	108.035	195.773	188.209	30.2676
YPK_0168	NC_010465	complement(216542..218857)	436.27	168.413	381.586	200.621
YPK_0169	NC_010465	complement(218949..219176)	61.1253	221.532	255.568	171.251
YPK_0170	NC_010465	complement(219700..222075)	164.236	185.418	269.766	177.478
YPK_0171	NC_010465	222609..223124	243.079	212.087	112.925	529.683
YPK_0172	NC_010465	223260..223979	106.46	241.634	485.579	173.534
YPK_0173	NC_010465	223976..225328	365.667	279.985	416.313	305.898
YPK_0174	NC_010465	complement(225667..227286)	348.414	763.875	419.636	527.834
YPK_0175	NC_010465	complement(227483..228364)	252.817	130.441	44.0435	190.357
YPK_0176	NC_010465	complement(228527..228934)	187.87	288.86	404.649	105.269
YPK_0177	NC_010465	complement(228963..229643)	317.205	173.062	171.129	103.203
YPK_0178	NC_010465	complement(229787..231934)	253.038	189.423	239.625	241.761
YPK_0179	NC_010465	232214..232408	71.4695	57.5605	0	0
YPK_0180	NC_010465	232521..233066	140.387	318.638	142.294	121.569
YPK_0181	NC_010465	complement(233187..233942)	331.823	63.0995	102.768	15.4941
YPK_0182	NC_010465	complement(234074..234511)	143.184	0	0	151.545
YPK_0183	NC_010465	complement(234521..235747)	0	57.1735	31.6596	117.74
YPK_0184	NC_010465	complement(235750..236319)	0	93.5358	68.1515	102.751
YPK_0185	NC_010465	complement(236316..237377)	72.1761	47.5606	109.735	84.5613
YPK_0186	NC_010465	complement(237377..237721)	0	40.6677	56.299	135.81
YPK_0187	NC_010465	complement(237782..238432)	0	34.4832	74.5897	47.9819
YPK_0188	NC_010465	complement(238422..239645)	0	96.2868	142.817	63.7994
YPK_0189	NC_010465	complement(239629..240948)	52.79	93.5358	88.2871	88.7392
YPK_0190	NC_010465	complement(240950..243157)	37.8711	66.0851	136.349	100.796
YPK_0191	NC_010465	complement(243157..243291)	0	0	287.751	0
YPK_0192	NC_010465	complement(243312..243479)	41.4778	33.4056	57.807	46.4824
YPK_0193	NC_010465	complement(243595..243792)	0	28.3442	0	0
YPK_0194	NC_010465	complement(243785..244285)	0	11.2019	0	0
YPK_0195	NC_010465	complement(244288..244575)	48.3908	38.9732	0	0
YPK_0196	NC_010465	complement(244572..244814)	57.3521	92.381	0	0
YPK_0197	NC_010465	complement(244811..245398)	201.464	90.6724	0	99.6052
YPK_0198	NC_010465	complement(245376..245630)	273.266	44.0168	152.339	0
YPK_0199	NC_010465	complement(245621..246259)	21.8099	70.2616	0	152.759
YPK_0200	NC_010465	complement(246351..246620)	258.084	145.5	0	347.069
YPK_0201	NC_010465	complement(246632..247069)	0	102.505	0	71.3155
YPK_0202	NC_010465	complement(247066..247467)	208.008	0	0	291.382
YPK_0203	NC_010465	complement(247452..247925)	88.2061	94.7198	40.9771	16.4748
YPK_0204	NC_010465	complement(247918..248310)	141.848	114.242	24.7114	99.3518
YPK_0205	NC_010465	complement(248303..248512)	0	133.623	0	37.1859
YPK_0206	NC_010465	complement(248512..249054)	76.9976	25.8386	107.31	79.0972
YPK_0207	NC_010465	complement(249044..249286)	172.056	161.667	319.723	64.272
YPK_0208	NC_010465	complement(249283..249504)	282.498	12.64	0	35.1759
YPK_0209	NC_010465	complement(249501..250001)	0	72.8123	0	15.5869
YPK_0210	NC_010465	complement(250001..250699)	119.627	68.245	222.297	67.0305
YPK_0211	NC_010465	complement(250782..250973)	362.931	29.2299	0	0
YPK_0212	NC_010465	complement(250975..251613)	0	26.3481	0	116.097
YPK_0213	NC_010465	complement(251603..251803)	0	13.9606	96.6327	0
YPK_0214	NC_010465	complement(251810..252043)	29.779	0	0	66.744
YPK_0215	NC_010465	complement(252062..252952)	31.283	59.8377	21.7993	21.9109
YPK_0216	NC_010465	complement(252995..255049)	57.6451	47.792	89.7908	64.6004
YPK_0217	NC_010465	complement(255051..255296)	0	45.6272	157.912	31.7441
YPK_0218	NC_010465	255478..256041	0	129.358	292.725	166.15
YPK_0219	NC_010465	complement(256387..258942)	65.4298	122.958	151.981	129.845
YPK_0220	NC_010465	259062..259958	357.348	93.8486	249.015	204.585
YPK_0221	NC_010465	259958..260563	459.952	138.915	208.334	154.635
YPK_0222	NC_010465	260511..261137	177.819	67.1309	216.846	99.637
YPK_0223	NC_010465	261103..261531	324.861	170.065	543.305	245.739
YPK_0224	NC_010465	261722..263104	236.811	188.695	126.398	254.091
YPK_0225	NC_010465	263453..263974	400.476	424.674	558.137	373.997
YPK_0226	NC_010465	264031..265119	294.344	257.674	187.276	523.472
YPK_0227	NC_010465	265373..266362	168.928	187.072	78.4774	102.543
YPK_0228	NC_010465	266446..267261	341.582	206.329	535.565	378.012
YPK_0229	NC_010465	267564..268241	246.665	120.024	229.182	236.114
YPK_0230	NC_010465	268234..268932	139.565	240.865	236.19	229.021
YPK_0231	NC_010465	268934..269974	528.813	336.944	167.924	183.786
YPK_0232	NC_010465	complement(270092..271513)	166.611	173.653	539.532	285.563
YPK_0233	NC_010465	complement(271576..272382)	155.426	69.5433	24.0684	106.443
YPK_0234	NC_010465	complement(272577..272903)	127.858	274.6	178.194	119.404
YPK_0235	NC_010465	complement(272900..275446)	243.493	195.004	205.899	219.217
YPK_0236	NC_010465	complement(275480..275593)	0	49.2294	511.136	68.5004
YPK_0237	NC_010465	275768..277066	343.318	224.659	538.286	234.452
YPK_0238	NC_010465	complement(277151..278335)	311.661	213.119	254.058	210.877
YPK_0239	NC_010465	278821..280866	180.508	153.607	289.544	240.455
YPK_0240	NC_010465	complement(280963..281949)	197.682	181.954	403.419	185.93
YPK_0241	NC_010465	complement(282178..283491)	148.487	96.0984	81.2994	74.287
YPK_0242	NC_010465	284007..284576	207.826	191.994	204.454	116.451
YPK_0243	NC_010465	284902..286443	131.051	180.156	384.181	238.019
YPK_0244	NC_010465	286686..287261	302.443	87.6898	151.743	67.7869
YPK_0245	NC_010465	287394..288611	314.66	115.192	191.361	125.022
YPK_0246	NC_010465	288750..288854	0	213.796	0	0
YPK_0247	NC_010465	complement(288837..290957)	279.257	133.623	196.887	189.611
YPK_0248	NC_010465	complement(291043..291675)	88.0667	407.834	629.028	185.049
YPK_0249	NC_010465	292011..292418	34.1582	89.4092	47.6058	248.818
YPK_0250	NC_010465	292696..292833	201.979	0	0	0
YPK_0251	NC_010465	292863..293342	261.31	175.38	40.4649	284.705
YPK_0252	NC_010465	293418..294290	462.956	176.786	467.224	147.594
YPK_0253	NC_010465	294250..294681	612.95	331.273	696.896	180.765
YPK_0254	NC_010465	complement(294859..295728)	320.381	264.48	468.835	273.765
YPK_0255	NC_010465	complement(295877..296113)	0	0	0	477.769
YPK_0256	NC_010465	complement(296110..297090)	85.2389	97.2543	59.3981	111.444
YPK_0257	NC_010465	297192..297794	219.564	307.132	96.6327	259.007
YPK_0258	NC_010465	297997..299058	131.229	145.324	109.735	235.301
YPK_0259	NC_010465	299067..299834	272.198	241.147	379.359	167.773
YPK_0260	NC_010465	299831..300685	40.7502	85.3309	136.303	86.7672
YPK_0261	NC_010465	300682..301530	254.437	142.121	240.216	225.349
YPK_0262	NC_010465	complement(301543..302523)	142.065	134.44	247.492	103.484
YPK_0263	NC_010465	complement(302616..303641)	163.001	128.543	170.379	76.1116
YPK_0264	NC_010465	complement(303776..305698)	210.172	213.046	126.256	146.191
YPK_0265	NC_010465	305949..306497	368.088	245.34	371.481	128.017
YPK_0266	NC_010465	306501..308309	242.676	136.503	123.475	174.829
YPK_0267	NC_010465	308325..308546	62.7773	455.039	87.4917	527.638
YPK_0268	NC_010465	308641..309222	71.8379	274.822	16.6866	107.341
YPK_0269	NC_010465	complement(309423..309641)	477.279	333.141	177.381	285.262
YPK_0270	NC_010465	309956..310756	191.388	928.351	448.6	302.223
YPK_0271	NC_010465	311010..311732	356.606	228.988	188.053	437.436
YPK_0272	NC_010465	311732..312127	316.74	42.5163	416.911	276.077
YPK_0273	NC_010465	312127..312492	190.39	253.007	849.1	512.069
YPK_0274	NC_010465	312512..312799	193.563	194.866	438.37	325.377
YPK_0275	NC_010465	312937..313311	74.3283	396.592	0	249.89
YPK_0276	NC_010465	313408..313878	784.116	583.854	61.8572	331.594
YPK_0277	NC_010465	313972..316080	469.178	835.568	501.926	535.044
YPK_0278	NC_010465	316152..317336	482.193	1984.38	967.061	728.185
YPK_0279	NC_010465	317539..317997	121.451	0	423.163	0
YPK_0280	NC_010465	318185..318379	107.204	1395.84	298.818	680.789
YPK_0281	NC_010465	318458..318931	338.123	349.279	450.749	362.445
YPK_0282	NC_010465	319345..319656	0	602.586	186.761	325.377
YPK_0283	NC_010465	319689..320318	320.762	677.021	385.38	725.126
YPK_0284	NC_010465	320335..320940	827.914	1690.13	785.26	895.592
YPK_0285	NC_010465	320937..321239	827.914	2750.51	1442.31	1417.48
YPK_0286	NC_010465	321256..322080	380.088	602.03	694.525	279.233
YPK_0287	NC_010465	322095..322373	399.615	1287.37	208.851	335.873
YPK_0288	NC_010465	322388..322720	502.218	606.719	962.409	445.561
YPK_0289	NC_010465	322738..323436	249.223	915.286	402.913	821.123
YPK_0290	NC_010465	323449..323859	101.727	2287.19	472.583	1577.01
YPK_0291	NC_010465	323859..324050	725.862	1914.56	556.393	549.074
YPK_0292	NC_010465	324050..324304	273.266	308.118	914.031	643.098
YPK_0293	NC_010465	324485..324856	0	701.518	600.447	388.353
YPK_0294	NC_010465	324867..325181	353.944	783.919	739.93	1028.81
YPK_0295	NC_010465	325196..325735	412.935	758.679	467.595	556.756
YPK_0296	NC_010465	325749..326054	45.5443	651.082	380.846	791.113
YPK_0297	NC_010465	326088..326480	585.123	1428.03	222.403	1162.42
YPK_0298	NC_010465	326495..327028	352.329	1313.7	581.968	950.54
YPK_0299	NC_010465	327038..327391	452.741	649.994	740.714	496.338
YPK_0300	NC_010465	327406..327909	317.997	450.976	809.299	294.389
YPK_0301	NC_010465	327912..328091	154.851	639.161	323.719	368.761
YPK_0302	NC_010465	328095..328529	176.209	632.173	223.255	619.338
YPK_0303	NC_010465	328537..329868	727.17	1451.49	612.442	1017.17
YPK_0304	NC_010465	329902..330018	119.116	47.9671	0	0
YPK_0305	NC_010465	330166..330522	1600.56	4110.86	761.693	2165.53
YPK_0306	NC_010465	330539..330928	357.348	1712.42	597.636	911.056
YPK_0307	NC_010465	330959..331579	617.158	1595.08	390.965	792.222
YPK_0308	NC_010465	331605..332594	619.403	1785.68	608.2	1080.65
YPK_0309	NC_010465	332635..333024	71.4695	122.316	149.409	100.116
YPK_0310	NC_010465	333471..333896	899.66	197.611	889.089	119.152
YPK_0311	NC_010465	333984..334184	416.017	307.132	724.745	252.531
YPK_0312	NC_010465	complement(334294..334698)	275.29	339.5	239.792	192.816
YPK_0313	NC_010465	complement(334846..336222)	652.802	218.046	402.005	235.349
YPK_0314	NC_010465	complement(336278..337567)	637.408	134.866	383.946	190.686
YPK_0315	NC_010465	complement(337661..338608)	279.319	216.079	338.061	313.021
YPK_0316	NC_010465	complement(338633..339145)	108.667	546.993	265.033	266.391
YPK_0317	NC_010465	339280..340401	223.581	185.071	190.423	128.759
YPK_0318	NC_010465	340373..340846	235.216	704.478	532.703	527.193
YPK_0319	NC_010465	340887..341426	632.307	119.518	233.797	281.993
YPK_0320	NC_010465	341428..342000	182.416	127.326	101.692	238.496
YPK_0321	NC_010465	342009..342830	440.816	256.029	141.775	294.502
YPK_0322	NC_010465	complement(342885..343427)	538.983	330.734	769.057	481.774
YPK_0323	NC_010465	343731..343850	0	327.375	323.719	195.226
YPK_0326	NC_010465	349642..350679	369.225	343.325	580.075	470.198
YPK_0327	NC_010465	350676..351635	682.311	280.607	758.717	329.444
YPK_0328	NC_010465	complement(351670..352620)	329.729	244.904	633.142	414.676
YPK_0329	NC_010465	complement(352831..353382)	302.969	213.506	299.089	360.744
YPK_0330	NC_010465	complement(353606..353740)	0	20.7857	0	0
YPK_0332	NC_010465	354371..355555	529.236	691.454	434.358	477.769
YPK_0333	NC_010465	355806..356189	399.224	160.765	50.5812	294.873
YPK_0334	NC_010465	356191..356736	472.209	668.113	71.1471	200.232
YPK_0335	NC_010465	356927..357355	162.431	745.67	226.377	864.638
YPK_0336	NC_010465	357359..358063	138.377	322.4	303.056	177.227
YPK_0337	NC_010465	358428..358925	601.679	1346.69	819.049	431.223
YPK_0338	NC_010465	358992..359360	358.8	250.95	52.6373	84.6509
YPK_0339	NC_010465	complement(359506..359643)	100.99	122.003	0	0
YPK_0340	NC_010465	359703..363731	361.472	603.839	325.407	430.283
YPK_0341	NC_010465	363860..368080	275.694	343.696	354.32	274.732
YPK_0342	NC_010465	complement(368387..369517)	653.084	275.397	394.989	276.182
YPK_0343	NC_010465	complement(369510..370325)	170.791	99.7256	166.62	258.388
YPK_0344	NC_010465	complement(370327..370542)	225.824	129.911	0	90.3825
YPK_0345	NC_010465	complement(370539..371336)	17.4644	119.557	146.039	107.644
YPK_0346	NC_010465	complement(371326..372000)	144.527	49.8857	215.813	254.517
YPK_0347	NC_010465	complement(371987..374032)	255.435	163.208	132.905	177.478
YPK_RS01735	NC_010465	complement(374135..374251)	119.116	0	166.01	0
YPK_0348	NC_010465	complement(374407..374916)	245.939	440.168	457.016	168.43
YPK_0349	NC_010465	375013..375795	80.0952	261.613	285.27	299.197
YPK_0350	NC_010465	375888..376673	124.117	364.147	667.208	432.18
YPK_0351	NC_010465	376792..377859	110.918	139.253	427.382	142.581
YPK_0352	NC_010465	377889..378629	225.693	200.704	445.606	252.925
YPK_0353	NC_010465	378675..379265	931.462	612.493	131.46	502.105
YPK_0354	NC_010465	379454..379729	403.958	1799.55	598.177	877.103
YPK_0355	NC_010465	379779..380432	213.097	235.985	564.282	304.481
YPK_0356	NC_010465	complement(380599..381885)	292.375	259.458	264.107	157.759
YPK_0357	NC_010465	complement(381945..383534)	205.981	275.313	531.389	208.732
YPK_0358	NC_010465	383945..384064	0	233.839	0	97.6131
YPK_0362	NC_010465	complement(389982..390254)	76.5745	102.787	0	257.441
YPK_0363	NC_010465	390322..391251	404.61	153.881	73.0979	268.698
YPK_0364	NC_010465	391672..393270	305.053	180.754	303.677	185.581
YPK_0365	NC_010465	393317..394624	229.08	306.78	259.867	268.66
YPK_0366	NC_010465	394769..396607	234.928	167.846	274.607	169.854
YPK_0367	NC_010465	complement(396727..397569)	281.046	259.637	126.723	361.273
YPK_0368	NC_010465	397784..401479	271.491	174.62	260.132	308.474
YPK_0372	NC_010465	complement(405295..406680)	196.077	111.352	287.283	177.478
YPK_0373	NC_010465	407050..408696	165.005	197.635	318.413	94.8275
YPK_0374	NC_010465	complement(408693..408809)	0	0	0	0
YPK_0375	NC_010465	408831..409238	631.927	206.329	142.817	488.066
YPK_0376	NC_010465	complement(409381..410271)	203.339	148.02	185.294	284.842
YPK_0377	NC_010465	complement(410285..411862)	264.954	119.143	400.034	175.679
YPK_0378	NC_010465	complement(412049..413260)	287.47	108.816	384.617	219.066
YPK_0379	NC_010465	413738..414100	0	61.8418	374.551	301.175
YPK_0380	NC_010465	414088..415197	125.555	126.4	166.234	112.563
YPK_0381	NC_010465	415268..416539	284.867	110.302	114.523	128.923
YPK_0382	NC_010465	416780..417691	191.016	86.1514	170.379	107.032
YPK_0383	NC_010465	418030..418440	33.9089	0	0	19.0001
YPK_0384	NC_010465	418431..418649	63.6372	205.01	177.381	320.92
YPK_0385	NC_010465	complement(418592..419110)	671.318	145.981	580.075	210.649
YPK_0386	NC_010465	419634..420131	895.522	298.638	429.026	211.691
YPK_0387	NC_010465	420199..421680	230.395	195.024	176.932	237.117
YPK_0388	NC_010465	421687..422127	63.2043	95.4447	176.174	35.4152
YPK_0389	NC_010465	422127..423947	306.13	137.145	90.6628	222.993
YPK_0390	NC_010465	423911..424981	357.848	104.802	99.7455	167.701
YPK_0391	NC_010465	425107..426423	333.335	247.156	567.799	495.107
YPK_0392	NC_010465	426423..426968	804.032	303.22	658.111	479.127
YPK_0393	NC_010465	426971..428317	93.1173	116.659	223.503	214.502
YPK_0394	NC_010465	428317..429084	299.418	135.188	126.453	249.117
YPK_0395	NC_010465	429095..431698	222.107	156.252	253.605	233.912
YPK_0396	NC_010465	431695..432492	139.715	119.557	194.718	48.9289
YPK_0397	NC_010465	432489..433175	375.293	163.381	197.907	130.719
YPK_0398	NC_010465	433181..434569	115.385	135.354	104.877	154.607
YPK_0399	NC_010465	434601..438134	189.291	131.808	189.615	269.582
YPK_0400	NC_010465	438259..439566	58.6017	79.3767	222.743	110.449
YPK_0401	NC_010465	439588..441810	53.2887	103.508	183.485	184.424
YPK_0402	NC_010465	441816..442274	182.177	85.5883	105.791	331.757
YPK_0403	NC_010465	442267..446439	193.702	134.487	258.324	213.331
YPK_0404	NC_010465	446442..446861	99.5468	20.0434	231.228	74.3719
YPK_0405	NC_010465	447145..447390	396.569	79.8476	394.78	253.953
YPK_0406	NC_010465	447390..447878	513.002	120.506	556.082	191.633
YPK_0407	NC_010465	complement(447924..448286)	249.553	208.716	53.5073	139.831
YPK_0408	NC_010465	448319..448594	0	0	0	0
YPK_0409	NC_010465	448579..448686	0	0	0	72.306
YPK_0410	NC_010465	448646..452215	255.699	156.417	231.228	244.99
YPK_0411	NC_010465	452212..452493	0	29.8518	275.506	0
YPK_0412	NC_010465	452695..452916	251.109	189.6	0	246.231
YPK_0413	NC_010465	complement(453206..454105)	402.612	143.422	377.673	199.565
YPK_0414	NC_010465	complement(454102..455232)	227.963	136.458	300.535	110.473
YPK_0415	NC_010465	455502..456368	136.633	145.644	190.423	202.657
YPK_0416	NC_010465	complement(456528..457031)	55.3038	139.19	231.228	224.665
YPK_0417	NC_010465	complement(457037..457966)	254.754	123.709	125.311	201.524
YPK_0418	NC_010465	complement(458147..458848)	466.537	163.887	442.693	239.166
YPK_0421	NC_010465	459914..461035	18.6318	65.0249	233.701	205.318
YPK_0422	NC_010465	461054..462202	266.844	105.014	135.235	129.131
YPK_0423	NC_010465	462214..463008	96.4164	187.072	146.59	147.341
YPK_0424	NC_010465	463005..463820	68.3165	130.675	83.3101	66.9894
YPK_0425	NC_010465	complement(464439..464642)	68.3165	55.021	285.635	133.979
YPK_0426	NC_010465	465096..466451	46.2496	124.163	214.858	210.199
YPK_0427	NC_010465	complement(466708..467916)	443.803	478.123	1036.22	545.794
YPK_0428	NC_010465	468170..469819	228.053	198.976	576.809	101.754
YPK_0429	NC_010465	complement(470036..471223)	434.051	304.7	253.417	407.543
YPK_0430	NC_010465	complement(471375..472295)	174.018	115.777	147.624	169.578
YPK_0431	NC_010465	473102..474091	288.585	198.409	137.336	240.582
YPK_0432	NC_010465	474295..475791	176.883	168.702	116.773	190.401
YPK_0433	NC_010465	475784..476773	274.508	229.588	235.432	307.629
YPK_0434	NC_010465	476775..477728	175.303	326.493	458.094	327.423
YPK_0435	NC_010465	477747..479384	302.044	164.458	260.873	266.976
YPK_0436	NC_010465	479381..479986	241.475	208.372	320.514	244.838
YPK_0437	NC_010465	complement(480085..480939)	146.701	328.196	306.682	260.302
YPK_0438	NC_010465	481190..482536	144.849	141.658	374.909	281.172
YPK_0439	NC_010465	complement(482582..482698)	0	47.9671	166.01	0
YPK_0440	NC_010465	complement(482688..483863)	142.21	178.959	173.421	175.969
YPK_0441	NC_010465	484021..484173	273.266	0	253.898	0
YPK_0442	NC_010465	complement(484200..484412)	130.86	52.6962	0	0
YPK_0443	NC_010465	complement(484672..484884)	65.4298	171.263	0	219.973
YPK_0444	NC_010465	complement(485144..485356)	65.4298	408.396	91.1886	109.987
YPK_0445	NC_010465	complement(485890..486357)	148.895	71.9506	41.5025	200.232
YPK_0446	NC_010465	486833..487645	419.982	138.06	334.47	273.749
YPK_0447	NC_010465	487710..488600	187.698	233.052	217.993	350.575
YPK_0448	NC_010465	488792..489187	158.37	297.614	98.0968	256.358
YPK_0449	NC_010465	489341..490705	224.619	302.192	618.98	383.301
YPK_0450	NC_010465	490795..491469	650.373	108.086	129.488	248.733
YPK_0451	NC_010465	491535..492011	701.21	211.779	264.676	302.867
YPK_0452	NC_010465	complement(492765..493061)	0	113.377	0	78.8793
YPK_0453	NC_010465	complement(493086..494051)	137.057	191.719	130.694	141.468
YPK_0454	NC_010465	complement(494640..495521)	213.315	101.808	319.315	177.076
YPK_0455	NC_010465	complement(495597..497051)	392.714	146.572	246.961	136.86
YPK_0456	NC_010465	complement(497041..497283)	114.704	115.476	0	192.816
YPK_0457	NC_010465	498343..498519	0	95.1211	0	44.1189
YPK_0458	NC_010465	complement(498765..500114)	154.851	315.943	201.425	211.134
YPK_0459	NC_010465	complement(500126..500590)	59.9422	199.141	229.736	285.492
YPK_0460	NC_010465	complement(500748..501200)	215.355	247.777	364.452	370.628
YPK_0461	NC_010465	complement(501462..502082)	561.053	99.41	125.109	169.762
YPK_0462	NC_010465	complement(502082..503182)	272.149	359.361	264.621	237.605
YPK_0463	NC_010465	complement(503405..504382)	156.751	169.283	119.161	179.656
YPK_0464	NC_010465	504783..506699	127.225	169.799	182.377	138.502
YPK_0465	NC_010465	507036..508079	193.563	263.405	334.882	172.038
YPK_0466	NC_010465	508283..509278	279.851	231.022	214.513	121.526
YPK_0467	NC_010465	509275..509763	256.501	292.658	714.963	47.9083
YPK_0468	NC_010465	509777..510370	398.858	146.445	163.495	98.5991
YPK_0469	NC_010465	510360..511829	450.331	183.254	429.424	377.172
YPK_0470	NC_010465	511923..515846	175.805	133.725	222.743	135.325
YPK_0471	NC_010465	515843..516712	88.1047	141.916	122.79	103.223
YPK_0472	NC_010465	516724..518169	125.294	265.859	228.35	251.121
YPK_0473	NC_010465	complement(518371..521229)	173.049	101.093	244.573	229.437
YPK_0474	NC_010465	complement(521283..521456)	400.476	80.6343	558.137	0
YPK_0475	NC_010465	complement(521443..521802)	96.7816	15.5893	188.836	162.689
YPK_0476	NC_010465	complement(521799..522200)	606.691	111.685	652.271	271.957
YPK_0477	NC_010465	complement(522213..522515)	436.955	277.829	256.411	103.09
YPK_0478	NC_010465	complement(522649..527118)	138.742	116.135	143.393	151.988
YPK_0479	NC_010465	complement(527175..530768)	401.345	128.046	308.047	272.687
YPK_0480	NC_010465	complement(530809..533310)	370.416	148.042	399.797	232.524
YPK_0481	NC_010465	complement(533546..534358)	565.691	162.221	525.596	398.617
YPK_0482	NC_010465	complement(534673..535584)	206.298	190.764	362.055	346.783
YPK_0483	NC_010465	535887..536090	649.006	192.574	47.6058	727.313
YPK_0484	NC_010465	536098..537033	178.674	92.9362	186.761	29.2005
YPK_0485	NC_010465	537035..538990	74.8128	170.717	198.601	201.614
YPK_0486	NC_010465	539257..540726	218.055	257.701	198.196	175.305
YPK_0487	NC_010465	540921..541394	117.608	307.839	266.351	453.057
YPK_0488	NC_010465	541399..541680	444.784	407.975	551.012	276.917
YPK_0489	NC_010465	complement(541776..542324)	368.088	214.672	300.723	170.69
YPK_0490	NC_010465	542505..543845	301.387	150.662	354.86	212.551
YPK_0491	NC_010465	544005..544613	469.129	350.183	302.989	115.405
YPK_0492	NC_010465	544821..545207	144.047	188.522	100.378	221.963
YPK_0493	NC_010465	complement(545439..545849)	169.544	116.066	0	104.501
YPK_0494	NC_010465	complement(546202..547863)	142.552	180.656	111.023	361.791
YPK_0495	NC_010465	complement(547958..549373)	241.134	192.224	226.329	234.382
YPK_0496	NC_010465	complement(549784..550737)	416.344	94.124	71.259	135.062
YPK_0497	NC_010465	complement(550971..551447)	496.691	323.551	407.194	392.908
YPK_0498	NC_010465	complement(551746..552132)	108.035	246.528	476.796	151.338
YPK_0499	NC_010465	complement(552270..552737)	297.79	155.893	560.284	116.802
YPK_0500	NC_010465	complement(552746..553681)	312.679	194.866	176.386	221.09
YPK_0501	NC_010465	complement(554019..554291)	153.149	493.375	71.1471	171.627
YPK_0502	NC_010465	complement(554288..555142)	179.301	370.861	408.909	260.302
YPK_0503	NC_010465	complement(555448..555930)	432.812	482.203	321.709	169.762
YPK_0504	NC_010465	complement(556049..556336)	96.7816	487.165	67.4415	216.918
YPK_0505	NC_010465	complement(556360..557793)	140.921	234.818	277.667	356.689
YPK_0506	NC_010465	complement(557855..558580)	76.7854	158.47	107.015	37.6469
YPK_0507	NC_010465	complement(558587..559132)	76.5745	179.876	177.868	243.139
YPK_0508	NC_010465	complement(559116..559679)	172.971	144.284	103.315	89.9979
YPK_0509	NC_010465	complement(559676..560239)	49.4204	154.235	172.191	263.071
YPK_0510	NC_010465	complement(560789..561862)	214.109	99.2838	108.509	69.0744
YPK_0511	NC_010465	complement(561886..562860)	314.466	207.218	268.936	396.459
YPK_0512	NC_010465	563125..563943	365.856	246.688	569.177	371.859
YPK_0513	NC_010465	564161..564943	169.09	197.106	434.107	259.304
YPK_0514	NC_010465	564948..565505	99.9036	191.095	174.043	90.9656
YPK_0515	NC_010465	565518..566141	390.849	188.87	249.015	225.261
YPK_0516	NC_010465	566177..566479	367.962	157.436	128.206	103.09
YPK_0517	NC_010465	566617..566880	211.16	191.323	73.5726	162.689
YPK_0518	NC_010465	567034..568296	121.379	286.606	415.222	197.854
YPK_0519	NC_010465	complement(568477..569628)	465.762	216.789	42.151	274.537
YPK_0520	NC_010465	complement(569655..571028)	405.722	275.706	282.724	238.705
YPK_0521	NC_010465	complement(571299..571703)	602.197	810.643	623.46	366.35
YPK_0522	NC_010465	571848..571970	0	0	0	0
YPK_0523	NC_010465	571927..573054	142.084	144.284	60.2669	76.1521
YPK_0524	NC_010465	573368..573796	227.403	287.802	0	136.522
YPK_0525	NC_010465	573811..574203	88.6549	28.5605	148.268	119.222
YPK_RS02620	NC_010465	complement(574200..574397)	70.3867	28.3442	196.194	39.4396
YPK_0526	NC_010465	574577..575218	86.8321	450.196	151.271	370.991
YPK_0527	NC_010465	575224..575739	337.61	418.736	263.493	204.306
YPK_0528	NC_010465	complement(575892..576377)	28.676	444.584	419.636	176.748
YPK_0529	NC_010465	complement(576977..578395)	122.767	110.74	157.411	203.619
YPK_0530	NC_010465	complement(578405..582862)	164.125	183.798	246.166	219.837
YPK_0531	NC_010465	583619..584608	183.005	221.085	245.242	287.909
YPK_0532	NC_010465	584643..584861	509.098	179.384	88.6903	410.064
YPK_0533	NC_010465	584892..587228	187.848	234.14	241.023	212.184
YPK_RS02665	NC_010465	587246..587440	0	287.802	99.606	340.394
YPK_0534	NC_010465	587470..588123	287.681	326.088	267.291	298.511
YPK_0535	NC_010465	588120..588845	182.365	231.907	173.899	155.966
YPK_0536	NC_010465	complement(589052..589627)	145.172	170.508	118.023	189.803
YPK_0537	NC_010465	complement(589638..590228)	94.3253	322.865	476.541	198.199
YPK_0538	NC_010465	complement(590499..590852)	19.6844	95.1211	0	253.684
YPK_0539	NC_010465	complement(590951..592924)	162.381	144.995	191.87	263.071
YPK_0540	NC_010465	592987..593886	92.9104	162.129	64.7439	121.474
YPK_0541	NC_010465	complement(594484..595188)	306.407	107.467	275.506	193.842
YPK_0542	NC_010465	595450..596343	319.574	219.715	152.083	253.314
YPK_0543	NC_010465	complement(596474..597460)	494.204	130.779	118.074	138.458
YPK_0544	NC_010465	complement(597546..597941)	351.933	219.667	220.718	207.058
YPK_0545	NC_010465	complement(598245..598529)	195.601	246.147	374.833	109.601
YPK_0546	NC_010465	complement(598526..598921)	263.95	283.442	564.057	266.218
YPK_0547	NC_010465	complement(598924..599229)	523.76	1348.02	729.956	1173.91
YPK_0548	NC_010465	complement(599384..599764)	384.078	382.981	458.815	143.473
YPK_0549	NC_010465	complement(599990..600379)	196.541	0	149.409	0
YPK_0550	NC_010465	complement(600376..601074)	418.695	276.994	152.829	307.223
YPK_0551	NC_010465	complement(601351..601884)	274.033	136.625	363.73	168.172
YPK_0552	NC_010465	complement(602133..602927)	385.666	109.419	97.7266	270.124
YPK_0553	NC_010465	complement(603190..604494)	336.4	124.714	297.673	170.542
YPK_RS02775	NC_010465	604541..604708	0	167.028	0	0
YPK_0554	NC_010465	605239..606648	212.508	256.726	206.629	207.687
YPK_0555	NC_010465	606847..608298	355.133	166.2	153.834	147.899
YPK_0556	NC_010465	608309..609799	158.901	127.977	293.106	196.405
YPK_0557	NC_010465	609952..610482	380.565	412.192	219.471	338.245
YPK_0558	NC_010465	complement(610549..611868)	401.204	144.555	272.219	221.848
YPK_0559	NC_010465	complement(612340..613335)	307.836	183.127	165.76	156.808
YPK_0560	NC_010465	complement(613538..614047)	81.9798	225.586	418.931	382.796
YPK_0561	NC_010465	complement(614303..617296)	283.945	189.321	295.175	236.045
YPK_0562	NC_010465	617771..618958	164.236	68.4984	98.0968	138.039
YPK_0563	NC_010465	complement(619074..621095)	182.65	94.3684	124.877	137.102
YPK_0564	NC_010465	complement(621308..621877)	232.276	315.068	425.947	541.153
YPK_RS02835	NC_010465	621973..622206	178.674	155.893	0	233.604
YPK_0565	NC_010465	complement(622245..623744)	436.679	170.235	310.771	184.814
YPK_0566	NC_010465	complement(623776..625524)	346.621	158.834	194.343	185.292
YPK_0567	NC_010465	complement(625524..626564)	180.733	167.124	121.278	146.279
YPK_0568	NC_010465	complement(626666..627367)	327.569	95.9341	387.357	261.414
YPK_0569	NC_010465	complement(627306..627947)	401.599	209.8	438.685	255.436
YPK_0570	NC_010465	complement(627980..628618)	43.6199	162.48	227.971	146.649
YPK_0571	NC_010465	629333..631021	103.142	146.202	172.497	143.328
YPK_0572	NC_010465	631066..633042	186.808	97.9358	112.983	142.198
YPK_RS02880	NC_010465	633116..633367	414.778	66.8113	154.152	433.836
YPK_0574	NC_010465	633374..633679	0	55.021	0	102.079
YPK_0575	NC_010465	633782..637015	265.027	159.653	252.249	213.698
YPK_0576	NC_010465	637017..637550	456.722	105.096	36.373	175.484
YPK_0577	NC_010465	637676..639475	290.345	224.486	372.277	262.471
YPK_0578	NC_010465	639472..639705	0	239.835	0	817.614
YPK_0579	NC_010465	639977..640198	188.332	189.6	0	281.407
YPK_0580	NC_010465	640158..640292	0	0	0	57.8448
YPK_0581	NC_010465	640294..640710	768.683	248.98	0	102.997
YPK_0582	NC_010465	640743..641540	401.68	109.008	267.738	78.2862
YPK_0583	NC_010465	complement(641999..644284)	387.127	195.173	412.084	237.414
YPK_0584	NC_010465	complement(644344..645339)	69.9626	171.858	380.273	215.611
YPK_0585	NC_010465	complement(645441..646820)	212.078	148.437	239.271	209.373
YPK_0586	NC_010465	647146..648261	305.955	135.778	69.6171	276.396
YPK_0587	NC_010465	648344..651697	249.312	112.109	220.06	224.679
YPK_0588	NC_010465	651806..652792	402.423	187.64	442.777	174.062
YPK_0589	NC_010465	652869..654113	123.134	182.564	171.61	106.63
YPK_0590	NC_010465	654167..655048	221.215	114.534	220.217	101.819
YPK_0591	NC_010465	655048..655866	238.232	147.327	154.152	252.674
YPK_0592	NC_010465	655866..656378	108.667	0	132.517	129.39
YPK_0593	NC_010465	656429..658612	130.815	86.0837	137.848	109.055
YPK_0594	NC_010465	complement(658676..660202)	182.535	167.225	133.558	209.673
YPK_0595	NC_010465	complement(660207..662108)	186.847	228.676	311.465	192.968
YPK_0596	NC_010465	complement(662092..663141)	225.64	96.2082	166.484	44.6231
YPK_RS03005	NC_010465	complement(663151..663399)	83.9552	67.6162	78.0047	439.063
YPK_0598	NC_010465	complement(663483..663683)	69.3361	27.9211	0	330.233
YPK_RS03015	NC_010465	complement(663856..663963)	193.563	259.822	0	216.918
YPK_0599	NC_010465	664449..665681	491.679	209.374	378.066	345.169
YPK_0600	NC_010465	665674..667125	571.092	171.998	287.602	204.369
YPK_0601	NC_010465	667138..667575	111.365	153.757	155.208	205.032
YPK_0602	NC_010465	667709..668341	374.284	146.288	214.79	314.583
YPK_0603	NC_010465	668352..668732	548.683	154.665	152.938	163.97
YPK_0604	NC_010465	669017..669421	137.645	200.929	47.9584	385.632
YPK_0605	NC_010465	complement(669636..669938)	781.919	213.002	448.72	283.497
YPK_0606	NC_010465	complement(670198..670914)	155.499	97.8408	27.0895	119.804
YPK_0607	NC_010465	671076..672008	253.935	75.1895	176.953	179.951
YPK_0608	NC_010465	672399..673013	543.866	205.322	126.33	279.348
YPK_0609	NC_010465	complement(673010..673168)	0	105.89	122.158	147.341
YPK_0610	NC_010465	673347..674525	76.8343	114.242	271.825	251.691
YPK_0611	NC_010465	674534..675064	564.286	89.8366	347.495	73.5315
YPK_0612	NC_010465	675078..675551	205.814	65.1198	40.9771	0
YPK_0613	NC_010465	675604..676206	57.7801	134.952	16.1054	97.1275
YPK_0614	NC_010465	676659..678089	165.564	178.444	230.743	185.54
YPK_0615	NC_010465	678089..678817	0	161.667	133.218	203.528
YPK_0616	NC_010465	678961..679158	35.1933	56.6883	196.194	236.638
YPK_0617	NC_010465	679173..679976	34.6681	31.4113	72.4745	140.835
YPK_0618	NC_010465	679966..680598	209.158	79.7935	168.764	240.563
YPK_RS03125	NC_010465	complement(680397..680576)	0	0	107.906	0
YPK_0619	NC_010465	680644..681051	0	34.3882	285.635	38.2796
YPK_0620	NC_010465	681044..681418	111.492	22.4486	258.976	20.8241
YPK_0621	NC_010465	681411..681605	0	28.7802	0	40.0464
YPK_0622	NC_010465	681605..683038	131.202	39.1363	148.992	144.309
YPK_0623	NC_010465	683417..684871	186.779	144.643	320.382	257.618
YPK_0624	NC_010465	684871..685314	486.524	75.8398	174.983	158.292
YPK_0625	NC_010465	complement(685397..685945)	25.3854	148.226	176.896	156.465
YPK_0626	NC_010465	686112..686288	0	95.1211	0	0
YPK_0627	NC_010465	686292..686642	317.642	15.989	0	111.24
YPK_0628	NC_010465	686639..687436	104.786	77.3604	97.3592	58.7146
YPK_0629	NC_010465	687458..687979	0	43.005	0	97.2391
YPK_0630	NC_010465	688315..688899	47.6464	57.5605	66.404	13.3488
YPK_0631	NC_010465	689126..689434	270.613	1144.22	62.8581	732.888
YPK_0632	NC_010465	complement(689529..689768)	348.414	128.612	485.579	260.302
YPK_0633	NC_010465	690045..690734	373.661	138.27	112.598	232.008
YPK_0634	NC_010465	complement(691156..692994)	155.356	509.64	306.292	307.861
YPK_0635	NC_010465	complement(693152..694900)	219.128	200.548	105.5	147.341
YPK_0636	NC_010465	complement(695036..695251)	0	129.911	0	36.153
YPK_0637	NC_010465	695657..696670	185.546	107.926	57.465	200.232
YPK_0638	NC_010465	complement(696861..697511)	85.6317	185.347	89.5077	281.893
YPK_0639	NC_010465	697619..697978	232.276	46.7679	242.79	336.223
YPK_0640	NC_010465	698252..699070	280.773	174.737	521.746	305.115
YPK_0641	NC_010465	complement(699306..700544)	196.844	144.946	94.0589	233.2
YPK_0642	NC_010465	complement(700704..701324)	695.706	356.972	234.579	339.524
YPK_0643	NC_010465	701628..702935	143.841	94.3939	245.017	62.6873
YPK_0644	NC_010465	703107..705962	126.873	164.081	238.029	129.877
YPK_0645	NC_010465	706097..707527	228.867	233.349	128.945	133.698
YPK_0646	NC_010465	707564..708814	200.526	152.528	481.309	184.146
YPK_0647	NC_010465	complement(709139..709420)	49.4204	567.185	0	775.366
YPK_0649	NC_010465	709990..710643	95.8937	158.753	475.184	59.7022
YPK_0650	NC_010465	711102..711884	151.291	121.847	347.285	229.385
YPK_0651	NC_010465	complement(712168..713328)	222.073	299.701	593.904	309.402
YPK_0652	NC_010465	complement(713338..714024)	121.717	240.987	268.588	295.539
YPK_0653	NC_010465	714090..714260	81.5003	98.4587	0	0
YPK_0654	NC_010465	complement(714325..715719)	359.653	343.97	243.66	344.27
YPK_0655	NC_010465	716115..716747	198.15	221.649	184.106	129.534
YPK_0656	NC_010465	716781..717206	98.1448	111.979	91.1886	210.808
YPK_0657	NC_010465	717215..718057	429.835	326.21	207.365	250.112
YPK_0658	NC_010465	718115..718696	323.271	163.929	216.925	107.341
YPK_0659	NC_010465	718798..720693	158.036	168.72	122.931	263.597
YPK_0660	NC_010465	720697..721608	183.376	116.92	95.838	175.532
YPK_0661	NC_010465	complement(721666..722250)	166.762	230.242	249.015	307.022
YPK_0662	NC_010465	722554..724827	180.795	170.289	247.701	202.609
YPK_0663	NC_010465	725134..725865	85.6756	130.337	172.473	149.353
YPK_0664	NC_010465	725828..725935	0	51.9643	0	36.153
YPK_0665	NC_010465	726044..727468	229.831	236.301	320.312	213.721
YPK_0666	NC_010465	727776..730103	263.406	153.08	229.44	88.8917
YPK_0667	NC_010465	complement(730125..730958)	225.592	164.865	69.8675	215.357
YPK_0668	NC_010465	complement(731377..732534)	264.771	189.01	285.141	77.551
YPK_0669	NC_010465	732931..733824	358.547	178.911	304.166	192.169
YPK_0670	NC_010465	complement(733916..734578)	252.245	173.528	263.663	235.567
YPK_0671	NC_010465	complement(734772..735983)	132.236	64.8268	96.1543	74.0958
YPK_0672	NC_010465	736462..737499	261.814	337.918	130.985	372.397
YPK_0673	NC_010465	737503..737934	0	168.884	89.9221	135.574
YPK_0674	NC_010465	complement(737880..738065)	0	30.1728	313.277	0
YPK_0677	NC_010465	complement(739611..740183)	145.933	102.84	0	61.3276
YPK_0678	NC_010465	complement(740167..740640)	499.834	88.7998	286.84	205.935
YPK_0679	NC_010465	complement(740637..741407)	262.101	47.3138	705.381	278.533
YPK_0680	NC_010465	complement(741391..742224)	534.736	188.417	477.428	468.168
YPK_0681	NC_010465	complement(742221..743096)	604.554	230.636	399.106	178.289
YPK_0682	NC_010465	complement(743093..744379)	227.403	176.606	203.74	160.792
YPK_0683	NC_010465	complement(744391..745518)	142.084	74.6296	198.02	218.072
YPK_0684	NC_010465	complement(745529..745819)	0	9.64286	33.3731	201.264
YPK_0685	NC_010465	complement(745816..747087)	591.646	141.186	397.014	383.699
YPK_0686	NC_010465	complement(747130..748011)	624.143	136.804	275.272	270.041
YPK_0687	NC_010465	complement(748063..748485)	16.4735	39.8025	137.753	9.23055
YPK_0688	NC_010465	complement(748552..748749)	0	14.1721	0	78.8793
YPK_0689	NC_010465	complement(748971..749558)	142.21	171.8	132.13	199.21
YPK_RS03475	NC_010465	complement(750484..750744)	53.3968	161.269	0	29.9197
YPK_0691	NC_010465	complement(750764..751030)	52.1968	21.0193	0	14.6237
YPK_0692	NC_010465	complement(751068..752465)	189.41	128.461	194.51	217.849
YPK_0693	NC_010465	complement(752537..753952)	226.371	160.517	164.603	234.382
YPK_0694	NC_010465	755096..755626	603.655	348.777	0	397.07
YPK_0695	NC_010465	755933..758413	266.822	117.627	277.921	184.131
YPK_0696	NC_010465	758431..759150	280.667	179.277	53.9532	146.42
YPK_0697	NC_010465	759175..760278	359.775	241.465	184.731	325.377
YPK_0698	NC_010465	complement(760490..761569)	419.387	254.625	215.813	394.068
YPK_0699	NC_010465	762425..763420	391.791	188.762	195.012	399.861
YPK_0700	NC_010465	complement(763512..764081)	330.076	255.993	494.098	280.852
YPK_0701	NC_010465	764093..764224	422.32	0	294.29	0
YPK_0702	NC_010465	complement(764293..766386)	236.269	139.366	213.339	208.838
YPK_0703	NC_010465	complement(766376..767509)	350.257	116.301	102.768	247.906
YPK_0704	NC_010465	complement(767509..768288)	71.4695	125.914	161.86	235.273
YPK_0705	NC_010465	complement(768289..768561)	51.0497	205.573	284.589	157.325
YPK_0706	NC_010465	complement(768563..769333)	18.076	61.8719	188.941	45.5781
YPK_0707	NC_010465	complement(769330..769743)	168.316	122.003	328.411	480.992
YPK_0708	NC_010465	complement(769736..770635)	154.851	109.125	140.278	260.302
YPK_0709	NC_010465	771158..772186	609.47	136.35	386.953	311.148
YPK_0710	NC_010465	772203..772583	182.894	44.1901	0	194.714
YPK_0711	NC_010465	772593..774233	369.433	129.958	159.788	226.039
YPK_0712	NC_010465	774205..775248	467.222	142.454	260.464	175.778
YPK_0713	NC_010465	775253..775969	242.966	58.7045	27.0895	201.489
YPK_0714	NC_010465	775962..777302	171.479	123.459	492.459	168.876
YPK_0715	NC_010465	777306..777743	31.8186	140.944	155.208	133.717
YPK_0716	NC_010465	complement(778043..778468)	16.3575	46.1092	68.3914	54.9933
YPK_0717	NC_010465	complement(778475..778741)	52.1968	126.116	0	116.989
YPK_0718	NC_010465	complement(778989..779807)	170.166	116.491	237.157	166.86
YPK_0719	NC_010465	779895..780371	116.868	47.062	0	65.4847
YPK_0720	NC_010465	780374..780799	458.009	52.6962	364.754	27.4966
YPK_0721	NC_010465	780802..781458	106.062	93.9629	428.67	112.916
YPK_0722	NC_010465	781513..781821	135.306	99.8926	251.433	480.168
YPK_0723	NC_010465	781827..782603	116.586	133.623	187.482	120.603
YPK_0724	NC_010465	complement(782767..783213)	93.5339	188.327	304.166	165.964
YPK_0725	NC_010465	complement(783194..784111)	182.177	122.269	285.635	221.171
YPK_0726	NC_010465	784867..786072	196.452	102.377	177.16	184.542
YPK_0727	NC_010465	786326..786481	0	0	0	0
YPK_0728	NC_010465	786719..787486	136.099	80.3823	50.5812	50.8402
YPK_0729	NC_010465	787488..788288	339.279	154.141	121.243	165.735
YPK_0730	NC_010465	788332..788937	68.9929	166.697	673.08	122.419
YPK_0731	NC_010465	788937..789848	267.423	159.995	266.217	184.095
YPK_0732	NC_010465	790308..790904	46.6886	225.614	65.0692	143.885
YPK_0733	NC_010465	790904..791356	230.738	136.277	150.069	215.481
YPK_0734	NC_010465	791340..791711	37.4639	60.3457	78.3192	335.873
YPK_0735	NC_010465	791712..791840	54.0177	0	0	60.5353
YPK_0736	NC_010465	complement(791837..792304)	148.895	125.914	332.02	158.517
YPK_RS03700	NC_010465	complement(792553..792855)	781.919	46.3048	256.411	103.09
YPK_0737	NC_010465	complement(793502..796069)	328.334	136.588	264.724	336.02
YPK_0738	NC_010465	796508..797800	150.899	132.382	97.6416	178.165
YPK_0739	NC_010465	797813..800713	170.544	92.8587	150.645	78.0636
YPK_0740	NC_010465	800713..800931	0	51.2525	0	178.289
YPK_0741	NC_010465	complement(801066..802562)	735.463	151.832	343.83	213.875
YPK_0742	NC_010465	802840..803427	154.061	76.3557	33.0326	159.368
YPK_0743	NC_010465	804249..817187	158.333	95.6394	168.878	149.675
YPK_0744	NC_010465	complement(817304..819172)	260.984	184.669	358.534	323.81
YPK_0745	NC_010465	complement(819734..820639)	138.443	99.1108	42.8767	172.385
YPK_0746	NC_010465	complement(820886..822733)	211.16	81.9956	52.5519	124.657
YPK_0747	NC_010465	complement(823239..823373)	0	0	0	0
YPK_0748	NC_010465	823482..825038	250.625	180.223	349.293	250.772
YPK_0749	NC_010465	825480..826712	96.0752	204.823	157.528	123.501
YPK_0750	NC_010465	827238..829310	383.205	211.166	487.219	269.342
YPK_RS03765	NC_010465	829461..832814	284.632	178.203	240.328	337.6
YPK_RS03775	NC_010465	839415..841088	270.572	152.54	232.057	268.232
YPK_0752	NC_010465	841101..846794	201.926	146.365	230.254	233.833
YPK_0753	NC_010465	846791..847861	266.76	107.422	63.4744	182.284
YPK_0754	NC_010465	847858..848985	259.457	126.87	198.02	173.073
YPK_0755	NC_010465	848978..849742	100.197	168.731	203.118	168.43
YPK_0756	NC_010465	849732..851018	292.375	248.557	249.015	327.652
YPK_0757	NC_010465	851018..852790	62.8835	112.37	273.874	211.412
YPK_0758	NC_010465	852783..854540	336.919	177.175	259.638	273.183
YPK_0759	NC_010465	complement(854863..855738)	230.685	195.4	498.883	222.861
YPK_0760	NC_010465	complement(856172..856570)	541.395	133.623	316.417	469.717
YPK_0761	NC_010465	856807..856938	422.32	212.581	147.145	295.797
YPK_0762	NC_010465	857971..859452	310.328	130.647	131.06	231.848
YPK_0763	NC_010465	860468..864232	159.169	114.032	149.607	141.04
YPK_0764	NC_010465	864818..867043	234.78	105.89	200.689	124.538
YPK_0765	NC_010465	867069..868388	337.856	142.429	264.861	269.176
YPK_0766	NC_010465	868402..872802	213.751	122.419	229.494	163.243
YPK_0767	NC_010465	872802..873215	235.642	74.5575	70.3738	56.5873
YPK_0768	NC_010465	873297..873842	102.099	113.065	498.03	85.8137
YPK_0769	NC_010465	873844..874437	879.833	217.305	147.145	361.53
YPK_0770	NC_010465	874708..876789	147.264	136.126	396.486	108.772
YPK_0771	NC_010465	876809..877171	95.9818	131.414	0	247.394
YPK_0772	NC_010465	877295..878278	531.119	293.725	404.649	579.33
YPK_0773	NC_010465	878275..878790	405.132	32.6288	301.134	143.771
YPK_0774	NC_010465	878936..879259	215.07	233.839	419.636	337.428
YPK_0775	NC_010465	879503..880027	610.554	155.002	73.993	565.226
YPK_0776	NC_010465	880302..880688	558.183	137.766	150.567	221.963
YPK_0777	NC_010465	881232..881645	117.821	81.3355	258.037	565.873
YPK_0778	NC_010465	complement(881824..883203)	318.117	126.07	281.495	147.127
YPK_0779	NC_010465	complement(883418..884437)	170.791	129.299	342.762	114.839
YPK_0780	NC_010465	884731..885804	304.943	114.96	144.679	123.607
YPK_0781	NC_010465	885966..887390	405.872	200.856	272.606	216.461
YPK_0782	NC_010465	complement(887665..889845)	185.31	147.959	138.037	268.537
YPK_0783	NC_010465	complement(889917..891245)	120.595	137.242	65.7669	123.394
YPK_0784	NC_010465	complement(891242..892990)	67.7306	129.955	149.922	133.946
YPK_0785	NC_010465	complement(892987..893937)	102.582	73.7664	388.055	123.171
YPK_0786	NC_010465	complement(893921..895693)	121.837	140.858	230.054	193.795
YPK_0787	NC_010465	complement(895690..895782)	0	0	0	0
YPK_0788	NC_010465	895833..897056	199.256	171.941	333.241	181.828
YPK_0789	NC_010465	complement(897347..898180)	116.974	164.865	244.536	168.541
YPK_0790	NC_010465	complement(898556..899914)	123.06	138.342	185.799	241.339
YPK_0791	NC_010465	900476..901219	580.69	207.438	626.554	356.865
YPK_0792	NC_010465	complement(901200..901850)	685.054	323.28	328.195	383.855
YPK_0793	NC_010465	903021..903671	331.823	280.176	507.21	551.791
YPK_0794	NC_010465	904188..904517	168.928	93.5358	88.2871	283.965
YPK_0795	NC_010465	904585..904848	52.79	53.1453	147.145	251.428
YPK_0796	NC_010465	905005..905376	18.7319	30.1728	52.2128	125.952
YPK_0797	NC_010465	905419..905574	0	71.9506	0	0
YPK_0798	NC_010465	906784..907284	27.8175	61.6104	213.228	140.282
YPK_0799	NC_010465	907333..908877	297.674	201.601	320.577	101.088
YPK_0800	NC_010465	908889..910241	61.8029	87.1065	107.667	109.661
YPK_0801	NC_010465	910238..910924	40.5722	61.268	84.8173	90.9351
YPK_0802	NC_010465	910924..912660	112.327	64.6188	106.229	119.136
YPK_0803	NC_010465	912664..913155	198.284	125.475	315.824	55.5522
YPK_0804	NC_010465	913543..916185	121.279	90.2445	88.1869	116.707
YPK_0805	NC_010465	916188..918536	157.224	101.539	144.702	109.706
YPK_0806	NC_010465	918552..920849	236.521	139.205	211.305	168.211
YPK_0807	NC_010465	920836..921603	272.198	164.418	252.906	294.873
YPK_0808	NC_010465	921699..921974	429.206	122.003	422.243	396.111
YPK_RS04055	NC_010465	922028..922363	248.867	83.5141	0	46.4824
YPK_0809	NC_010465	922895..923407	298.835	175.038	605.791	380.558
YPK_RS04065	NC_010465	923538..923846	0	127.136	188.574	252.72
YPK_0811	NC_010465	924843..927005	322.158	125.839	170.615	225.643
YPK_0812	NC_010465	927586..928545	217.759	195.841	212.441	260.302
YPK_0813	NC_010465	928591..930090	246.213	159.011	239.552	174.402
YPK_0814	NC_010465	930123..931106	120.387	216.729	424.388	456.321
YPK_0815	NC_010465	complement(931351..933495)	168.928	85.0325	144.881	112.858
YPK_0816	NC_010465	complement(933488..934588)	88.6066	86.6544	282.262	156.039
YPK_0817	NC_010465	complement(934542..934712)	0	49.2294	0	68.5004
YPK_0818	NC_010465	complement(934906..935994)	255.951	133.991	124.85	319.103
YPK_0819	NC_010465	complement(936165..936437)	102.099	226.13	177.868	257.441
YPK_0820	NC_010465	complement(936615..937874)	165.911	86.8546	246.643	89.866
YPK_0821	NC_010465	938143..938862	183.885	167.585	0	173.534
YPK_0822	NC_010465	938862..939188	383.575	128.719	415.786	119.404
YPK_0823	NC_010465	939299..940225	435.987	390.489	440.007	88.452
YPK_0824	NC_010465	940337..941071	331.823	347.419	105.704	329.361
YPK_0825	NC_010465	941575..950907	386.753	163.56	298.642	284.064
YPK_0826	NC_010465	complement(951097..952227)	104.74	148.863	223.255	117.377
YPK_0827	NC_010465	complement(952220..952813)	93.8489	103.929	294.29	157.759
YPK_0828	NC_010465	complement(952913..953203)	287.352	135	0	268.352
YPK_0829	NC_010465	complement(953200..953754)	213.443	171.904	419.96	225.126
YPK_0830	NC_010465	complement(953717..953902)	374.639	181.037	104.426	0
YPK_0831	NC_010465	complement(954042..954863)	245.84	153.617	259.921	389.502
YPK_0832	NC_010465	complement(954996..955694)	189.41	76.2738	83.3612	234.607
YPK_0833	NC_010465	955714..956838	86.7164	149.657	172.65	222.124
YPK_0834	NC_010465	complement(956947..958062)	287.223	143.321	339.383	157.44
YPK_0835	NC_010465	complement(958066..958950)	393.688	212.437	307.259	123.533
YPK_0836	NC_010465	complement(959130..959552)	0	205.646	137.753	147.689
YPK_0837	NC_010465	complement(959552..960115)	333.588	159.21	51.6574	221.533
YPK_0838	NC_010465	complement(960231..961190)	246.793	260.146	313.603	317.243
YPK_0839	NC_010465	complement(961216..961947)	380.78	149.504	411.283	266.702
YPK_0840	NC_010465	complement(962056..962202)	284.42	381.779	66.0652	690.596
YPK_0841	NC_010465	complement(962262..962969)	68.8954	83.231	82.3016	110.297
YPK_0842	NC_010465	complement(963067..963630)	0	154.235	103.315	103.844
YPK_0843	NC_010465	complement(963771..964925)	120.663	199.219	344.74	169.027
YPK_0844	NC_010465	965743..965886	0	0	0	0
YPK_0845	NC_010465	966132..968111	436.397	294.779	387.482	268.19
YPK_0846	NC_010465	968311..968769	30.3629	55.021	84.6325	85.0659
YPK_0847	NC_010465	968878..969033	0	0	0	0
YPK_0848	NC_010465	969023..969481	60.7257	0	0	442.343
YPK_0849	NC_010465	complement(969795..970547)	305.383	335.387	141.869	461.491
YPK_0850	NC_010465	971021..973015	247.994	420.559	316.417	281.83
YPK_0851	NC_010465	973430..974446	130.184	366.969	553.856	214.998
YPK_0852	NC_010465	974549..975712	125.716	535.179	292.015	295.187
YPK_0853	NC_010465	975832..976911	193.563	971.733	341.704	560.372
YPK_0854	NC_010465	977349..978218	168.2	103.212	189.767	148.103
YPK_0855	NC_010465	978464..979081	225.511	263.353	267.147	265.356
YPK_0856	NC_010465	979250..980050	139.192	161.148	206.113	199.857
YPK_0857	NC_010465	complement(980061..980969)	137.986	89.5227	53.419	124.567
YPK_0858	NC_010465	981311..981967	222.73	260.533	325.198	237.718
YPK_0859	NC_010465	982274..983515	370.295	458.642	125.109	443.267
YPK_0860	NC_010465	complement(983780..984376)	338.493	150.409	439.217	241.989
YPK_0861	NC_010465	complement(984740..985069)	464.552	416.659	117.716	295.797
YPK_0862	NC_010465	985406..985984	288.841	300.478	486.418	242.768
YPK_0863	NC_010465	986072..987385	169.699	96.0984	162.599	41.6007
YPK_0864	NC_010465	987522..988700	70.924	99.9619	280.063	182.145
YPK_0865	NC_010465	988750..990093	171.096	114.832	216.776	130.732
YPK_0866	NC_010465	990059..990298	0	23.3839	0	32.5377
YPK_0867	NC_010465	990814..991911	272.893	240.228	176.896	259.59
YPK_0868	NC_010465	991980..992366	216.071	413.298	727.741	403.568
YPK_0869	NC_010465	992578..995457	220.178	170.508	148.371	145.064
YPK_0870	NC_010465	995835..996272	95.4559	89.6918	133.035	142.631
YPK_0871	NC_010465	997332..999482	252.685	166.982	270.895	194.228
YPK_0872	NC_010465	999586..1000689	429.206	195.713	351.869	304.157
YPK_0873	NC_010465	1000891..1001592	277.937	435.701	705.542	272.538
YPK_0874	NC_010465	1001884..1002381	517.724	180.31	273.016	478.265
YPK_0875	NC_010465	complement(1002454..1003446)	252.626	319.322	342.302	294.904
YPK_0876	NC_010465	1003763..1004029	521.968	210.193	0	146.237
YPK_RS04395	NC_010465	1004010..1004435	130.86	158.089	91.1886	146.649
YPK_0878	NC_010465	1004435..1005133	438.633	236.85	527.954	357.496
YPK_0879	NC_010465	1005158..1006591	199.233	123.279	237.033	313.124
YPK_0880	NC_010465	1006676..1008133	253.305	167.441	239.792	345.462
YPK_0881	NC_010465	complement(1008218..1008736)	214.822	259.521	336.818	368.635
YPK_0882	NC_010465	complement(1008807..1009748)	88.7679	89.3654	371.143	157.507
YPK_0883	NC_010465	complement(1009883..1010446)	197.682	164.185	619.888	193.842
YPK_0884	NC_010465	1010585..1010815	0	24.295	84.083	33.8054
YPK_0885	NC_010465	1010818..1011351	78.2953	10.5096	0	87.7421
YPK_0886	NC_010465	1011361..1011546	0	45.2592	0	83.9683
YPK_0887	NC_010465	1011558..1011875	131.477	35.2965	0	171.897
YPK_0888	NC_010465	1011942..1012814	255.424	125.357	200.239	268.352
YPK_0889	NC_010465	1012853..1013080	0	49.2294	340.757	34.2502
YPK_0890	NC_010465	1013092..1013364	102.099	102.787	0	57.2091
YPK_0891	NC_010465	1013368..1014372	13.8672	97.7239	241.582	198.14
YPK_0892	NC_010465	1014369..1016648	67.2378	84.9206	68.1515	65.0754
YPK_0893	NC_010465	1016641..1017027	0	50.7558	276.04	90.8029
YPK_0894	NC_010465	1017227..1017442	129.042	155.893	0	234.995
YPK_0895	NC_010465	complement(1017419..1017685)	26.0984	0	72.7459	73.1184
YPK_0896	NC_010465	complement(1017736..1018761)	95.0837	82.0489	18.931	49.4725
YPK_0897	NC_010465	complement(1018758..1020545)	54.5615	51.7899	54.3153	52.4097
YPK_0898	NC_010465	1020712..1021566	81.5003	85.3309	124.944	73.0671
YPK_0899	NC_010465	1021621..1022652	94.5309	78.8528	37.6418	45.4014
YPK_0900	NC_010465	1022663..1023361	0	72.2594	111.148	39.1011
YPK_0901	NC_010465	1023457..1023909	0	0	107.192	86.1926
YPK_0902	NC_010465	1023906..1024394	0	63.1223	0	0
YPK_0903	NC_010465	1024397..1025068	0	58.4599	0	139.447
YPK_0904	NC_010465	1025095..1026234	12.2251	31.9991	102.227	20.5501
YPK_0905	NC_010465	1026231..1026683	61.5301	86.7219	257.26	17.2385
YPK_0906	NC_010465	1026693..1026983	0	9.64286	66.7463	80.5057
YPK_0907	NC_010465	1026935..1027321	144.047	21.7525	0	20.1784
YPK_0908	NC_010465	1027321..1027662	163.001	57.4342	0	68.5004
YPK_RS04550	NC_010465	1027619..1027810	72.5862	58.4599	0	0
YPK_0909	NC_010465	1027812..1028078	365.378	42.0385	36.373	58.4947
YPK_0910	NC_010465	1028266..1030242	148.036	51.0969	122.807	104.674
YPK_0911	NC_010465	1030242..1030574	167.406	101.12	174.983	0
YPK_0912	NC_010465	1030567..1031751	105.847	28.4159	24.5863	42.8344
YPK_0913	NC_010465	1031744..1032379	0	26.4724	0	104.366
YPK_0914	NC_010465	1032390..1034159	62.9901	50.7313	87.7883	61.7665
YPK_0915	NC_010465	1034170..1034598	0	39.2458	0	91.0145
YPK_0916	NC_010465	1034588..1035319	76.1561	0	13.2672	37.3383
YPK_0917	NC_010465	1035285..1035833	203.083	40.89	212.275	42.6724
YPK_0918	NC_010465	1035830..1037485	67.3264	27.1118	52.7803	75.4497
YPK_0919	NC_010465	1037661..1037858	0	113.377	0	118.319
YPK_0920	NC_010465	1038281..1039180	77.4253	305.55	258.976	273.317
YPK_0921	NC_010465	1039211..1039927	126.343	207.422	27.0895	179.706
YPK_0922	NC_010465	1039934..1041667	241.117	281.578	291.235	256.699
YPK_0923	NC_010465	1042012..1042944	291.279	309.781	62.4539	347.348
YPK_0924	NC_010465	1042954..1044471	445.272	264.34	243.109	187.767
YPK_0925	NC_010465	1044904..1046118	154.851	217.095	271.764	331.001
YPK_RS04645	NC_010465	1046621..1046809	0	0	51.384	0
YPK_0926	NC_010465	complement(1046941..1048638)	49.2458	62.7979	108.669	98.8778
YPK_0927	NC_010465	complement(1048635..1049189)	251.109	146.624	332.469	133.668
YPK_0928	NC_010465	complement(1049182..1049892)	0	35.5199	0	0
YPK_0929	NC_010465	complement(1049889..1050407)	349.085	205.454	392.954	947.919
YPK_0930	NC_010465	complement(1050407..1052002)	87.3218	103.733	170.379	114.983
YPK_0931	NC_010465	complement(1052012..1052635)	22.3342	40.4722	155.634	100.116
YPK_0932	NC_010465	complement(1052628..1053812)	23.5216	52.0959	188.495	144.978
YPK_0933	NC_010465	complement(1053809..1054138)	295.624	0	0	70.9913
YPK_0934	NC_010465	complement(1054135..1054293)	0	229.427	61.0791	24.5568
YPK_0935	NC_010465	complement(1054290..1054580)	0	135	0	107.341
YPK_0936	NC_010465	complement(1054583..1055749)	143.307	98.5853	58.2529	70.2614
YPK_0937	NC_010465	complement(1055746..1056447)	19.8526	23.9835	0	16.686
YPK_0938	NC_010465	complement(1056407..1056913)	27.4883	0	0	0
YPK_0939	NC_010465	complement(1056910..1057362)	0	24.7777	0	68.9541
YPK_0940	NC_010465	complement(1057482..1058225)	9.36597	52.8025	0	173.185
YPK_0941	NC_010465	complement(1058243..1059415)	53.4651	45.4522	8.27927	13.3147
YPK_0942	NC_010465	complement(1059498..1060433)	59.5579	95.9341	197.137	204.404
YPK_0943	NC_010465	1060611..1062704	26.6219	69.6828	32.4647	134.253
YPK_0944	NC_010465	1062691..1063056	0	61.3349	53.0688	234.698
YPK_0945	NC_010465	complement(1062998..1063819)	16.9544	27.3097	11.8146	71.2504
YPK_0946	NC_010465	1064119..1064445	85.2389	240.275	0	179.107
YPK_0947	NC_010465	1064438..1064590	364.354	0	126.949	0
YPK_0948	NC_010465	complement(1064604..1064804)	0	27.9211	0	19.4255
YPK_0949	NC_010465	complement(1064986..1065642)	148.487	98.2339	192.162	59.4296
YPK_0950	NC_010465	complement(1065655..1066020)	552.131	168.671	371.481	277.371
YPK_0951	NC_010465	1066289..1067431	256.052	181.671	263.394	283.531
YPK_0952	NC_010465	1067938..1069470	190.912	93.3527	228.061	257.245
YPK_0953	NC_010465	1069467..1069664	598.287	255.098	784.774	39.4396
YPK_0954	NC_010465	1070002..1070205	68.3165	192.574	999.722	459.356
YPK_0955	NC_010465	1070252..1070536	244.501	177.226	408.909	424.703
YPK_0956	NC_010465	1070946..1073105	267.763	188.371	157.364	238.61
YPK_0957	NC_010465	1073075..1073842	199.612	146.15	50.5812	177.941
YPK_0958	NC_010465	1074448..1075227	393.082	125.914	1033.41	230.267
YPK_0959	NC_010465	1075483..1075749	0	189.173	0	263.226
YPK_0960	NC_010465	complement(1075848..1076168)	173.664	87.4166	0	72.9818
YPK_0961	NC_010465	complement(1076168..1076848)	378.6	94.7719	28.5215	143.338
YPK_0962	NC_010465	complement(1077291..1078148)	154.309	186.417	226.377	195.681
YPK_RS04840	NC_010465	complement(1078524..1078952)	795.911	183.147	407.479	227.536
YPK_0964	NC_010465	complement(1079820..1080821)	159.951	229.639	290.766	261.081
YPK_0965	NC_010465	complement(1081255..1082283)	189.613	119.988	302.012	201.108
YPK_0966	NC_010465	complement(1082330..1083838)	157.006	221.287	244.559	338.961
YPK_0967	NC_010465	complement(1084377..1085483)	308.442	111.533	131.593	218.682
YPK_0968	NC_010465	1085839..1087074	118.393	145.298	361.434	192.699
YPK_0969	NC_010465	1087097..1087237	0	79.6049	0	0
YPK_0970	NC_010465	1087234..1088541	127.858	148.027	163.345	197.017
YPK_0971	NC_010465	1088553..1089404	179.932	138.328	239.37	142.066
YPK_0972	NC_010465	1089409..1090611	127.433	174.942	355.203	220.705
YPK_0973	NC_010465	1090662..1092722	155.527	103.475	108.378	153.453
YPK_0974	NC_010465	1092834..1093145	625.358	188.87	124.507	525.609
YPK_0975	NC_010465	complement(1093502..1094761)	376.066	118.033	308.304	381.156
YPK_0976	NC_010465	1095033..1096106	194.645	248.209	207.976	207.223
YPK_0977	NC_010465	complement(1096229..1098604)	187.698	85.0325	179.844	138.039
YPK_0978	NC_010465	complement(1098735..1100042)	95.8937	120.138	178.194	122.39
YPK_0979	NC_010465	1100436..1101518	308.843	108.823	143.477	183.87
YPK_0980	NC_010465	1101508..1101825	0	264.724	61.0791	49.1135
YPK_0981	NC_010465	complement(1101795..1102373)	60.1751	96.9283	134.184	114.641
YPK_0982	NC_010465	complement(1102397..1103251)	268.951	95.1767	90.8686	132.434
YPK_0983	NC_010465	complement(1103362..1104849)	295.028	115.034	176.218	204.673
YPK_0984	NC_010465	complement(1104972..1106579)	125.672	151.821	163.068	155.404
YPK_0985	NC_010465	complement(1106600..1107826)	62.4703	64.0343	71.2341	165.473
YPK_0986	NC_010465	complement(1108070..1109128)	151.341	135.137	247.604	180.663
YPK_0987	NC_010465	complement(1109144..1109899)	92.173	63.0995	192.69	201.424
YPK_0988	NC_010465	complement(1110095..1111261)	0	76.9446	183.08	26.7662
YPK_0989	NC_010465	complement(1111264..1111704)	31.6022	25.4519	88.0869	61.9766
YPK_0990	NC_010465	complement(1111790..1112680)	117.311	182.662	414.186	280.46
YPK_0991	NC_010465	complement(1112670..1113458)	123.645	60.4604	147.705	158.358
YPK_0992	NC_010465	complement(1113505..1114002)	223.88	163.406	39.0023	188.17
YPK_0993	NC_010465	complement(1114020..1115186)	262.729	117.821	99.862	180.672
YPK_0994	NC_010465	complement(1115183..1116481)	209.209	131.771	119.619	171.33
YPK_0995	NC_010465	complement(1116531..1117307)	80.7137	180.571	87.4917	180.905
YPK_0996	NC_010465	1118147..1119700	282.498	234.742	237.478	316.583
YPK_0997	NC_010465	complement(1119977..1123051)	287.796	104.03	255.817	162.53
YPK_0998	NC_010465	complement(1123160..1125346)	477.934	160.384	190.946	301.721
YPK_0999	NC_010465	complement(1125461..1126411)	439.639	206.546	214.451	480.367
YPK_RS05020	NC_010465	complement(1126433..1126627)	0	86.3407	0	20.0232
YPK_1000	NC_010465	complement(1127014..1127202)	294.954	118.776	616.608	82.6354
YPK_1001	NC_010465	1127698..1128453	285.736	567.896	295.458	366.695
YPK_1002	NC_010465	1129196..1129612	217.237	67.2919	232.892	299.628
YPK_RS05040	NC_010465	1129784..1130185	658.693	146.586	676.429	67.9892
YPK_1004	NC_010465	1130266..1132188	525.429	153.218	434.319	211.165
YPK_1005	NC_010465	1132185..1133696	470.082	165.172	706.531	415.76
YPK_1006	NC_010465	1133683..1134885	492.356	79.3071	242.184	217.459
YPK_1007	NC_010465	1134905..1135342	190.912	96.0984	376.934	169.374
YPK_1008	NC_010465	1135347..1135889	423.487	160.199	447.126	287.626
YPK_1009	NC_010465	1135981..1136271	407.082	115.714	266.985	429.363
YPK_1010	NC_010465	1136264..1136860	256.787	70.5043	113.871	228.908
YPK_1011	NC_010465	1136869..1137825	298.536	123.151	345.03	138.719
YPK_1012	NC_010465	1137809..1138999	327.644	129.584	252.778	288.495
YPK_1013	NC_010465	1138996..1139457	150.829	91.1063	294.29	380.311
YPK_1014	NC_010465	1139483..1140325	363.706	252.979	1059.86	347.378
YPK_1015	NC_010465	complement(1140309..1140674)	152.312	513.68	371.481	416.056
YPK_1016	NC_010465	1140958..1141710	370.161	59.6244	309.533	326.673
YPK_1017	NC_010465	1141673..1142074	69.3361	76.7831	144.949	145.691
YPK_1018	NC_010465	1142229..1143920	238.865	227.206	269.766	251.533
YPK_1019	NC_010465	complement(1143906..1144541)	131.477	119.126	76.3489	122.784
YPK_1020	NC_010465	complement(1144654..1145541)	219.721	139.04	131.238	237.437
YPK_1021	NC_010465	1145648..1146556	145.652	231.524	299.147	184.702
YPK_1022	NC_010465	1146925..1148085	288.094	195.773	267.675	279.135
YPK_1023	NC_010465	complement(1148082..1149023)	44.3839	65.5346	82.4763	78.7537
YPK_1024	NC_010465	1149238..1150500	237.241	86.6483	215.3	117.476
YPK_1025	NC_010465	complement(1150497..1151519)	95.3626	32.9158	161.385	190.837
YPK_1026	NC_010465	1151969..1154230	215.641	156.306	236.135	195.054
YPK_1027	NC_010465	1154679..1156835	177.68	191.234	229.62	121.281
YPK_1028	NC_010465	1156832..1158052	79.8984	103.418	151.122	329.374
YPK_1029	NC_010465	complement(1158081..1158314)	416.906	35.9753	83.005	116.802
YPK_1030	NC_010465	1158393..1158644	165.911	89.0817	77.0761	309.883
YPK_1031	NC_010465	complement(1159021..1160061)	107.101	277.642	205.24	165.033
YPK_1032	NC_010465	complement(1160432..1161118)	507.153	220.565	183.771	170.503
YPK_RS05190	NC_010465	1161351..1161542	1016.21	160.765	606.974	549.074
YPK_RS05195	NC_010465	1161517..1161789	357.348	123.344	569.177	529.185
YPK_1033	NC_010465	1161815..1162342	527.9	138.178	220.718	266.218
YPK_1034	NC_010465	1162355..1164601	254.294	191.068	350.084	196.356
YPK_1035	NC_010465	1164852..1165724	335.244	131.786	88.995	89.4507
YPK_1036	NC_010465	1165731..1166525	96.4164	278.842	268.748	314.326
YPK_RS05220	NC_010465	1166567..1166782	258.084	90.9376	989.143	650.754
YPK_1037	NC_010465	1166769..1167338	122.251	49.2294	34.0757	123.301
YPK_1038	NC_010465	1167329..1167937	286.054	115.192	271.095	205.164
YPK_1039	NC_010465	1167934..1168404	118.357	166.815	494.858	182.377
YPK_1040	NC_010465	1168392..1168802	135.636	143.376	661.616	152.001
YPK_1041	NC_010465	1168937..1172308	475.298	274.616	362.888	306.85
YPK_1042	NC_010465	1172390..1175278	320.796	287.504	299.18	254.085
YPK_1043	NC_010465	1175275..1178937	325.3	239.776	204.147	266.484
YPK_1044	NC_010465	1178934..1180907	162.381	167.739	142.673	110.767
YPK_1045	NC_010465	complement(1181062..1182387)	304.797	207.387	322.255	250.29
YPK_1046	NC_010465	1182623..1183873	289.649	134.584	194.076	246.569
YPK_1047	NC_010465	1184754..1185926	196.039	186.593	298.054	236.335
YPK_1048	NC_010465	1186069..1186896	50.4948	135.559	211.121	198.056
YPK_1049	NC_010465	complement(1186932..1187372)	63.2043	152.711	220.217	424.982
YPK_1050	NC_010465	complement(1187508..1188713)	161.784	179.161	322.109	233.106
YPK_1051	NC_010465	1188790..1188924	671.019	124.714	0	0
YPK_1052	NC_010465	1189388..1190305	242.903	262.878	126.949	233.931
YPK_1053	NC_010465	1190471..1190866	299.143	184.237	539.532	197.198
YPK_1054	NC_010465	1190859..1191965	289.558	233.206	122.82	162.248
YPK_1055	NC_010465	complement(1192216..1192971)	350.257	163.316	244.074	211.753
YPK_1056	NC_010465	complement(1193231..1194595)	290.983	166.514	170.753	137.302
YPK_1057	NC_010465	complement(1194748..1195593)	181.208	112.774	459.177	119.997
YPK_1058	NC_010465	1195725..1196276	227.226	172.838	281.495	233.423
YPK_1059	NC_010465	1196984..1197316	20.9258	210.666	291.639	152.429
YPK_1060	NC_010465	1197316..1198089	198.065	119.639	426.607	171.517
YPK_1061	NC_010465	1198117..1198566	650.373	305.55	863.252	251.625
YPK_1062	NC_010465	complement(1198656..1199045)	71.4695	86.3407	149.409	240.278
YPK_1063	NC_010465	complement(1199169..1199993)	168.928	442.169	612.124	478.008
YPK_1064	NC_010465	complement(1200168..1202906)	183.175	116.792	141.827	198.149
YPK_1065	NC_010465	complement(1202909..1203700)	193.563	155.893	220.718	359.887
YPK_1066	NC_010465	1204135..1204860	134.375	421.297	173.899	301.175
YPK_1067	NC_010465	1204988..1205845	146.188	510.195	362.204	350.406
YPK_1068	NC_010465	1206054..1206779	76.7854	293.749	200.653	231.26
YPK_1069	NC_010465	1206915..1207472	574.446	829.753	1479.36	657.751
YPK_1070	NC_010465	1207686..1208882	209.572	135.967	129.812	169.62
YPK_1071	NC_010465	1209106..1209864	119.351	144.186	217.519	195.483
YPK_1072	NC_010465	1209874..1210722	328.305	178.478	331.727	257.542
YPK_1073	NC_010465	1210751..1212106	179.86	343.516	401.068	452.072
YPK_1074	NC_010465	1212143..1214530	125.476	327.845	235.876	340.093
YPK_1075	NC_010465	1214688..1215185	307.836	3876.66	702.042	1364.23
YPK_1076	NC_010465	1215189..1216211	149.855	274.298	379.73	225.188
YPK_1077	NC_010465	1216369..1216899	236.213	158.535	146.314	235.301
YPK_1078	NC_010465	1216903..1217691	203.131	231.172	172.322	202.897
YPK_1079	NC_010465	1217695..1218879	258.738	255.743	172.104	349.265
YPK_1080	NC_010465	1218876..1219472	116.722	230.314	341.613	274.69
YPK_1081	NC_010465	1219602..1223117	192.242	228.253	303.832	368.687
YPK_1082	NC_010465	1223130..1224089	210.5	198.764	293.371	203.361
YPK_1083	NC_010465	1224273..1224671	296.894	168.786	121.699	264.216
YPK_1084	NC_010465	1224673..1226055	312.388	162.318	224.708	155.278
YPK_1085	NC_010465	1226311..1226628	43.8257	282.372	122.158	73.6703
YPK_1086	NC_010465	complement(1226893..1227153)	0	172.02	558.137	59.8394
YPK_1087	NC_010465	complement(1227140..1227340)	138.672	502.58	0	0
YPK_1088	NC_010465	1227582..1228130	25.3854	61.3349	283.033	284.483
YPK_1089	NC_010465	1228109..1228549	221.215	101.808	264.261	132.807
YPK_1090	NC_010465	1228634..1229317	275.064	82.0489	0	45.6669
YPK_1091	NC_010465	complement(1229451..1231169)	182.416	179.563	169.487	252.125
YPK_1092	NC_010465	complement(1231273..1231980)	275.582	103.048	219.471	176.476
YPK_1093	NC_010465	complement(1231977..1232384)	170.791	75.6539	333.241	200.968
YPK_1094	NC_010465	complement(1232502..1233317)	247.647	178.818	107.113	315.807
YPK_1095	NC_010465	complement(1233381..1234034)	255.717	266.019	1143.41	567.171
YPK_1096	NC_010465	complement(1234027..1235058)	229.575	59.8194	131.746	139.988
YPK_1097	NC_010465	1235245..1235811	196.636	98.9797	102.768	130.839
YPK_RS05540	NC_010465	complement(1236062..1236247)	899.133	1734.94	469.915	1469.44
YPK_1101	NC_010465	1241958..1242761	277.344	139.606	217.424	271.957
YPK_1102	NC_010465	1242814..1243260	1122.41	408.042	434.523	856.025
YPK_1103	NC_010465	1243299..1243406	0	51.9643	0	0
YPK_1104	NC_010465	1243642..1244403	54.8683	84.6977	165.683	153.721
YPK_1105	NC_010465	complement(1244446..1245864)	19.6428	136.448	109.503	99.0577
YPK_1106	NC_010465	complement(1245897..1246652)	82.9557	144.758	102.768	160.106
YPK_1107	NC_010465	1246697..1247416	174.207	202.661	134.883	140.997
YPK_1108	NC_010465	complement(1247471..1247935)	179.827	24.1383	0	75.5714
YPK_1109	NC_010465	1248005..1248769	118.415	124.714	291.982	280.717
YPK_1110	NC_010465	complement(1249015..1250499)	286.239	145.5	346.609	270.819
YPK_1111	NC_010465	1250820..1251770	388.348	106.224	122.544	160.122
YPK_1112	NC_010465	1251902..1252066	84.464	238.091	0	0
YPK_1113	NC_010465	complement(1252000..1253004)	173.34	136.814	299.561	244.761
YPK_1114	NC_010465	complement(1253052..1254218)	304.526	117.821	291.264	287.737
YPK_1115	NC_010465	complement(1254211..1255410)	365.835	93.5358	113.302	191.972
YPK_1116	NC_010465	complement(1256086..1257057)	358.451	181.875	279.758	285.207
YPK_1117	NC_010465	complement(1257164..1259314)	395.225	194.377	370.223	228.717
YPK_1118	NC_010465	complement(1259296..1259700)	0	62.3572	23.9792	173.534
YPK_1119	NC_010465	complement(1259714..1259950)	529.236	165.76	0	247.122
YPK_1120	NC_010465	1260489..1260854	76.1561	138.004	0	0
YPK_1121	NC_010465	1261333..1261668	207.389	559.544	1445.18	336.998
YPK_1122	NC_010465	complement(1261766..1262215)	30.9701	37.4143	215.813	190.888
YPK_1123	NC_010465	complement(1262380..1262718)	287.776	107.608	0	103.66
YPK_1124	NC_010465	1263226..1263438	65.4298	79.0443	911.886	219.973
YPK_1125	NC_010465	1264220..1265797	92.7337	124.477	190.785	185.576
YPK_1126	NC_010465	1265797..1266765	330.795	136.105	591.314	189.384
YPK_1127	NC_010465	1266762..1267568	146.791	191.244	168.479	227.401
YPK_1128	NC_010465	1267568..1268374	25.9044	100.838	72.2051	198.371
YPK_1129	NC_010465	1268367..1269032	136.017	172.746	160.402	199.33
YPK_1130	NC_010465	1269151..1269276	0	44.5408	0	123.953
YPK_1131	NC_010465	1270231..1270533	758.921	2222.63	384.617	902.035
YPK_1132	NC_010465	1270544..1271020	233.737	1011.83	203.597	221.011
YPK_1133	NC_010465	1271110..1272828	267.543	734.574	271.179	406.579
YPK_1134	NC_010465	1273124..1273819	110.131	383.013	306.975	235.618
YPK_1135	NC_010465	1273841..1274527	294.149	322.678	226.18	267.122
YPK_1136	NC_010465	1274654..1275316	94.592	330.126	175.775	312.126
YPK_1137	NC_010465	1275313..1276278	339.036	438.63	60.3204	194.014
YPK_1138	NC_010465	1276470..1277462	512.27	115.86	127.141	235.923
YPK_1139	NC_010465	1277611..1278669	440.864	230.527	385.162	302.333
YPK_1140	NC_010465	complement(1278834..1279163)	1478.12	697.267	706.297	378.621
YPK_RS05760	NC_010465	1279162..1279395	119.116	95.9341	747.045	0
YPK_1141	NC_010465	1279778..1280953	337.748	303.037	429.424	195.89
YPK_1142	NC_010465	complement(1281051..1281455)	929.104	124.714	71.9377	366.35
YPK_1143	NC_010465	complement(1281471..1281851)	329.21	162.03	50.9794	133.225
YPK_1144	NC_010465	1282892..1283209	569.733	273.548	427.554	577.084
YPK_1145	NC_010465	1283220..1284581	189.3	175.122	206.781	243.674
YPK_1146	NC_010465	1284748..1285095	100.119	80.6343	111.627	112.199
YPK_1147	NC_010465	1285132..1285974	314.11	196.392	437.77	250.112
YPK_1148	NC_010465	1286026..1286787	292.631	103.11	267.642	163.97
YPK_1149	NC_010465	complement(1286794..1286970)	78.7376	95.1211	329.206	22.0595
YPK_1150	NC_010465	complement(1287083..1287451)	56.6527	60.8363	210.549	253.953
YPK_RS05820	NC_010465	1287636..1287848	65.4298	158.089	182.377	164.98
YPK_1151	NC_010465	1287946..1288473	158.37	143.492	73.5726	88.7392
YPK_1152	NC_010465	1288546..1290189	207.692	201.409	259.921	140.126
YPK_RS05835	NC_010465	1290407..1290520	366.752	147.688	170.379	274.002
YPK_1153	NC_010465	1290563..1290805	516.169	138.572	719.377	112.476
YPK_1154	NC_010465	complement(1290933..1291361)	194.917	202.77	45.2754	245.739
YPK_1155	NC_010465	complement(1291456..1292085)	88.4861	75.7194	92.4913	167.337
YPK_1156	NC_010465	complement(1292768..1295494)	99.6564	83.3487	156.696	156.066
YPK_1157	NC_010465	complement(1295504..1296154)	0	77.5873	89.5077	143.946
YPK_1158	NC_010465	complement(1296318..1298384)	131.477	66.5204	93.9679	128.451
YPK_1159	NC_010465	complement(1298478..1300166)	288.798	234.255	126.498	194.186
YPK_RS05875	NC_010465	complement(1300167..1300256)	0	0	0	0
YPK_RS05880	NC_010465	complement(1300253..1300495)	401.465	34.6429	0	16.068
YPK_1160	NC_010465	1300661..1300867	538.611	54.2236	187.663	113.175
YPK_1161	NC_010465	1300951..1301079	108.035	826.595	150.567	1210.71
YPK_1162	NC_010465	1301230..1301712	634.791	180.1	80.4272	307.188
YPK_1163	NC_010465	1301842..1303305	199.91	111.17	245.443	194.693
YPK_1164	NC_010465	1303296..1304333	409.504	97.3205	112.273	206.887
YPK_1165	NC_010465	1304456..1305202	55.9701	176.553	286.017	162.035
YPK_1166	NC_010465	complement(1305287..1305442)	357.348	0	0	50.058
YPK_1167	NC_010465	1305822..1306478	307.58	217.823	310.416	213.947
YPK_1168	NC_010465	1306472..1307422	117.237	109.174	132.756	86.2198
YPK_1169	NC_010465	1307419..1308156	151.074	136.882	263.187	63.4882
YPK_1170	NC_010465	1308241..1308972	342.702	111.17	265.344	202.694
YPK_1171	NC_010465	1308969..1309988	218.613	101.789	199.944	187.57
YPK_1172	NC_010465	1309998..1310645	419.387	134.241	314.727	313.326
YPK_1173	NC_010465	complement(1310736..1311422)	284.006	106.198	494.768	181.87
YPK_1174	NC_010465	1311774..1312157	544.397	3763.35	429.94	1921.76
YPK_1175	NC_010465	1312336..1313298	311.148	148.608	161.355	137.854
YPK_1176	NC_010465	1313291..1313389	0	113.377	0	197.198
YPK_1177	NC_010465	1313376..1314032	254.549	136.673	133.035	344.692
YPK_1178	NC_010465	1313986..1314135	0	0	776.927	208.241
YPK_1179	NC_010465	complement(1314163..1315488)	173.419	101.577	14.6479	141.34
YPK_1180	NC_010465	1315728..1316486	422.32	110.912	371.062	128.608
YPK_1181	NC_010465	complement(1316769..1318406)	250.994	161.032	243.086	159.709
YPK_1182	NC_010465	1318594..1319169	241.954	764.85	202.325	271.148
YPK_1183	NC_010465	1319195..1319851	106.062	260.533	517.36	279.319
YPK_1184	NC_010465	1319851..1320807	269.411	290.283	131.923	167.278
YPK_1185	NC_010465	1320804..1321259	106.969	270.761	127.784	145.563
YPK_1186	NC_010465	complement(1321280..1322134)	228.201	190.353	170.379	292.268
YPK_1187	NC_010465	1322634..1324433	468.423	255.664	253.58	281.993
YPK_1188	NC_010465	1324443..1325441	223.208	230.328	349.967	328.308
YPK_1189	NC_010465	1325793..1326473	163.719	222.508	442.084	212.14
YPK_1190	NC_010465	1326470..1327381	404.955	347.682	340.757	137.001
YPK_1191	NC_010465	1327391..1328116	585.489	100.493	187.276	198.991
YPK_1192	NC_010465	1328275..1329006	0	214.672	305.145	272.037
YPK_1193	NC_010465	1329006..1329386	146.316	88.3803	0	20.4962
YPK_1194	NC_010465	complement(1329491..1329676)	0	120.691	0	83.9683
YPK_RS06040	NC_010465	complement(1329491..1329751)	480.571	43.005	446.51	0
YPK_1195	NC_010465	1329966..1331366	189.004	100.145	214.889	211.809
YPK_1196	NC_010465	complement(1331363..1331578)	0	155.893	0	108.459
YPK_1197	NC_010465	complement(1331575..1332966)	105.125	20.1586	13.9534	115.004
YPK_1198	NC_010465	complement(1333013..1333840)	235.642	61.0016	70.3738	179.193
YPK_1199	NC_010465	complement(1333815..1333997)	76.1561	184.005	0	0
YPK_1200	NC_010465	1334124..1334435	0	89.9382	280.142	0
YPK_1201	NC_010465	complement(1334438..1334575)	0	0	0	56.5873
YPK_1202	NC_010465	complement(1334572..1334841)	0	83.1429	0	144.612
YPK_1203	NC_010465	complement(1334825..1335055)	120.663	0	0	0
YPK_1204	NC_010465	complement(1335060..1337141)	133.877	44.4767	60.6391	76.8902
YPK_1205	NC_010465	complement(1337238..1338017)	0	17.9876	24.9015	0
YPK_1206	NC_010465	complement(1338075..1338452)	368.692	37.1174	102.768	0
YPK_1207	NC_010465	complement(1338505..1339053)	0	30.6675	141.517	85.3448
YPK_1208	NC_010465	complement(1339066..1340376)	37.2067	27.8253	22.2233	137.001
YPK_1209	NC_010465	complement(1340379..1341113)	75.8452	64.9024	145.343	58.4351
YPK_1210	NC_010465	complement(1341572..1342201)	88.4861	138.077	215.813	136.348
YPK_1211	NC_010465	1342347..1342562	0	77.9465	89.9221	216.918
YPK_1212	NC_010465	1342566..1344743	83.1842	65.7069	49.0484	93.221
YPK_1213	NC_010465	1345022..1345234	0	65.8703	0	183.311
YPK_1214	NC_010465	1345316..1345741	32.7149	92.2184	22.7971	128.318
YPK_1215	NC_010465	1346113..1346493	475.526	66.2852	0	40.9924
YPK_1216	NC_010465	complement(1346756..1347187)	193.563	110.424	0	198.842
YPK_1217	NC_010465	1347392..1347724	0	75.8398	58.3278	82.0771
YPK_1218	NC_010465	1347711..1348106	35.1933	42.5163	0	9.85991
YPK_1219	NC_010465	1348103..1348480	0	14.8469	0	41.3177
YPK_1220	NC_010465	1348700..1349251	75.7422	76.252	17.5934	14.1468
YPK_1221	NC_010465	complement(1349275..1349634)	77.4253	93.5358	0	75.9213
YPK_RS06175	NC_010465	complement(1349686..1349946)	0	268.781	0	284.237
YPK_1222	NC_010465	1350090..1351694	43.4161	59.4433	90.7625	58.3854
YPK_1223	NC_010465	1351947..1353485	167.528	51.0527	44.1722	27.9076
YPK_1224	NC_010465	1353442..1354323	15.8011	38.1779	55.0543	88.538
YPK_1225	NC_010465	1354316..1355464	175.875	83.0344	84.522	132.53
YPK_1226	NC_010465	1355464..1355955	0	11.4068	157.912	79.3602
YPK_1227	NC_010465	1355969..1357102	12.2897	49.4898	68.512	72.306
YPK_1228	NC_010465	1357161..1357529	37.7684	0	0	0
YPK_1229	NC_010465	1357539..1357970	32.2605	12.9911	0	36.153
YPK_1230	NC_010465	1357970..1358467	83.9552	0	0	7.84041
YPK_1231	NC_010465	1358467..1358850	0	87.6898	151.743	193.193
YPK_1232	NC_010465	1358840..1359379	51.6169	10.3929	143.875	7.2306
YPK_1233	NC_010465	1359392..1360906	128.787	79.6443	32.0514	115.976
YPK_1234	NC_010465	1360918..1361358	0	101.808	0	168.222
YPK_1235	NC_010465	1361358..1361813	198.657	55.383	149.081	188.376
YPK_1236	NC_010465	1361899..1363470	35.462	62.4762	18.5336	109.287
YPK_1237	NC_010465	1363470..1363979	327.919	88.0337	247.55	275.613
YPK_1238	NC_010465	1363981..1364283	0	46.3048	64.1029	64.4311
YPK_1239	NC_010465	1364287..1365126	8.29557	66.8113	57.807	264.95
YPK_1240	NC_010465	1365108..1365785	10.2777	24.8325	0	40.3122
YPK_1241	NC_010465	1365782..1366141	0	31.1786	215.813	119.305
YPK_1242	NC_010465	1366125..1367324	290.345	77.167	80.9299	39.0452
YPK_1243	NC_010465	1367390..1369201	199.973	54.2012	123.271	256.423
YPK_1244	NC_010465	1369205..1369426	0	25.2799	0	263.819
YPK_1245	NC_010465	1369419..1371200	82.1178	55.1137	136.246	124.892
YPK_1246	NC_010465	complement(1371232..1371510)	224.783	150.864	34.8085	489.815
YPK_1247	NC_010465	complement(1371491..1372009)	187.969	32.4402	37.4242	67.7085
YPK_1248	NC_010465	complement(1372457..1373296)	514.325	153.666	381.526	432.287
YPK_1249	NC_010465	1373504..1374391	211.873	192.76	317.158	202.261
YPK_1250	NC_010465	1374618..1375313	120.143	161.269	139.534	134.639
YPK_1251	NC_010465	1375423..1375986	370.653	169.16	189.41	152.304
YPK_1252	NC_010465	complement(1376113..1377654)	253.063	127.383	226.73	235.487
YPK_1253	NC_010465	1377889..1381779	281.167	210.582	162.234	152.528
YPK_1254	NC_010465	complement(1382196..1382645)	681.343	174.6	86.3252	173.534
YPK_1255	NC_010465	complement(1383097..1383657)	124.212	210.08	276.979	494.155
YPK_1256	NC_010465	1384673..1384774	0	0	0	38.2796
YPK_1257	NC_010465	1384852..1386288	227.912	144.502	195.989	277.148
YPK_1258	NC_010465	1386292..1387359	365.378	160.272	254.611	164.516
YPK_1259	NC_010465	1387322..1388659	20.8319	201.333	188.715	274.309
YPK_1260	NC_010465	1388679..1388822	532.299	331.273	67.4415	298.262
YPK_1261	NC_010465	1388819..1390441	210.379	205.744	341.072	190.054
YPK_1262	NC_010465	1390456..1390794	143.888	182.105	0	506.782
YPK_1263	NC_010465	complement(1391022..1391954)	328.622	165.417	281.043	192.506
YPK_1264	NC_010465	complement(1392385..1393575)	274.987	256.811	97.8497	154.083
YPK_1265	NC_010465	1394116..1395369	222.274	635.506	147.145	336.275
YPK_1266	NC_010465	1395482..1395703	125.555	101.12	524.95	35.1759
YPK_1267	NC_010465	1395703..1395828	0	1002.17	154.152	0
YPK_1268	NC_010465	1395821..1396360	1651.74	21097.5	1654.57	7917.51
YPK_RS06405	NC_010465	complement(1396470..1396673)	68.3165	0	0	210.538
YPK_1269	NC_010465	1396874..1398031	204.595	174.471	201.276	141.615
YPK_1270	NC_010465	complement(1398028..1399389)	230.229	173.062	263.824	269.475
YPK_1271	NC_010465	1399531..1400205	154.851	291	172.65	503.25
YPK_1272	NC_010465	1400196..1401218	197.537	175.551	66.4527	122.136
YPK_1273	NC_010465	complement(1401317..1402120)	156.006	226.859	326.135	199.111
YPK_1274	NC_010465	1402239..1403012	27.0088	166.769	125.473	196.74
YPK_1275	NC_010465	1403105..1403662	49.9518	160.922	69.6171	48.9815
YPK_1276	NC_010465	1403716..1404945	288.929	196.197	244.763	168.244
YPK_1277	NC_010465	1404976..1405362	36.0118	232.027	0	141.249
YPK_1278	NC_010465	1405632..1405955	86.0281	112.589	179.844	120.51
YPK_1279	NC_010465	1406066..1406590	185.821	69.4837	147.986	104.121
YPK_1280	NC_010465	1406833..1408749	178.115	131.741	227.971	158.87
YPK_1281	NC_010465	1408752..1409087	82.9557	150.325	375.746	104.585
YPK_1282	NC_010465	1409117..1409317	693.361	251.29	289.898	718.743
YPK_1283	NC_010465	1409314..1409412	0	0	0	0
YPK_1284	NC_010465	1409457..1410755	209.209	129.611	127.095	99.1911
YPK_1285	NC_010465	1410834..1411751	432.671	110.042	296.214	161.625
YPK_1286	NC_010465	complement(1412021..1413709)	206.284	74.7622	126.498	145.639
YPK_1287	NC_010465	complement(1413754..1415118)	188.884	61.6719	14.2294	62.9301
YPK_1288	NC_010465	1415834..1418254	143.913	77.6567	296.843	233.852
YPK_1289	NC_010465	1418581..1419009	227.403	287.802	135.826	191.131
YPK_1290	NC_010465	1419271..1420467	116.429	112.524	186.605	241.382
YPK_1291	NC_010465	1420621..1421370	176.53	213.262	181.283	52.0603
YPK_1292	NC_010465	1421360..1422466	188.842	131.812	105.275	232.79
YPK_1293	NC_010465	1422570..1423697	370.653	231.352	223.849	145.381
YPK_1294	NC_010465	1423906..1425180	459.087	286.109	388.463	211.304
YPK_1295	NC_010465	1425194..1425829	251.998	127.95	0	128.923
YPK_1296	NC_010465	1425841..1427022	182.755	325.239	164.325	254.356
YPK_1297	NC_010465	1427170..1428657	252.881	237.611	163.165	322.753
YPK_1298	NC_010465	1429026..1429982	393.194	202.319	10.1479	277.437
YPK_1299	NC_010465	1430031..1430255	61.9403	87.3001	258.976	173.534
YPK_1300	NC_010465	1430275..1430385	0	0	0	0
YPK_1301	NC_010465	complement(1430339..1431718)	95.9401	93.5358	372.981	189.567
YPK_1302	NC_010465	1431888..1433351	304.624	368.01	517.42	282.705
YPK_1303	NC_010465	1433531..1435108	362.103	213.39	190.785	212.794
YPK_1304	NC_010465	complement(1435392..1435871)	116.138	105.228	121.395	105.748
YPK_1305	NC_010465	complement(1435895..1436128)	0	23.9835	0	16.686
YPK_1306	NC_010465	1436157..1436345	0	252.398	411.072	82.6354
YPK_1307	NC_010465	complement(1436357..1436752)	351.933	113.377	98.0968	88.7392
YPK_1308	NC_010465	complement(1436814..1437209)	0	77.9465	171.669	197.198
YPK_1309	NC_010465	complement(1437273..1437668)	985.413	63.7744	98.0968	276.077
YPK_RS06610	NC_010465	complement(1437665..1438300)	284.867	114.714	137.428	128.923
YPK_RS06615	NC_010465	complement(1438331..1438585)	792.471	110.042	152.339	244.99
YPK_1311	NC_010465	1439041..1439775	208.574	64.9024	26.4261	79.6842
YPK_1312	NC_010465	1439928..1440869	110.96	113.196	195.881	389.623
YPK_RS06625	NC_010465	complement(1440962..1441162)	0	0	0	38.851
YPK_RS06630	NC_010465	complement(1441205..1441396)	0	29.2299	0	40.6721
YPK_1315	NC_010465	complement(1441580..1447510)	32.8969	24.1291	50.7603	50.0327
YPK_1316	NC_010465	1447960..1448121	258.084	34.6429	719.377	0
YPK_1317	NC_010465	complement(1448602..1449066)	29.9711	36.2074	187.966	193.127
YPK_RS06645	NC_010465	complement(1449056..1449688)	286.217	155.154	214.79	172.712
YPK_RS06650	NC_010465	complement(1449757..1449900)	580.69	38.9732	0	54.2295
YPK_1320	NC_010465	1450406..1450498	0	0	0	0
YPK_1321	NC_010465	1450495..1451295	130.492	98.0899	218.238	112.115
YPK_1322	NC_010465	complement(1451323..1452243)	45.396	109.684	463.963	97.5071
YPK_1323	NC_010465	1452474..1452983	163.96	264.101	0	352.173
YPK_1324	NC_010465	complement(1453270..1454160)	172.056	176.364	228.893	157.759
YPK_1325	NC_010465	complement(1454797..1456191)	179.827	263.509	355.047	184.73
YPK_1326	NC_010465	complement(1456489..1456827)	369.997	339.378	515.659	403.122
YPK_1327	NC_010465	complement(1456964..1457683)	58.069	113.022	161.86	119.305
YPK_1328	NC_010465	complement(1457693..1459078)	145.801	80.9834	168.166	61.9766
YPK_1329	NC_010465	complement(1459109..1460506)	269.161	124.447	187.563	226.228
YPK_1330	NC_010465	complement(1460540..1463614)	228.877	144.182	432.679	193.004
YPK_1331	NC_010465	complement(1463611..1466769)	172.056	108.37	159.861	142.14
YPK_1332	NC_010465	complement(1466769..1468103)	224.446	94.5867	174.59	128.688
YPK_1333	NC_010465	complement(1468491..1469576)	76.9976	198.957	178.851	154.599
YPK_1334	NC_010465	complement(1469959..1471464)	198.961	72.6672	180.561	152.966
YPK_1335	NC_010465	1471646..1472935	118.839	87.01	37.6418	30.2676
YPK_1336	NC_010465	1472988..1474016	115.122	130.896	188.758	147.985
YPK_1337	NC_010465	1474063..1475328	170.629	159.587	245.474	194.301
YPK_1338	NC_010465	1475390..1476238	98.4916	79.3236	57.1942	91.9794
YPK_1339	NC_010465	1476310..1476450	0	19.9012	344.382	0
YPK_1340	NC_010465	complement(1476509..1477861)	154.507	53.9231	122.023	187.579
YPK_1341	NC_010465	complement(1478001..1479476)	207.726	127.376	210.549	185.174
YPK_1342	NC_010465	complement(1479528..1479716)	73.7384	89.0817	0	165.271
YPK_1343	NC_010465	complement(1479905..1481464)	147.406	145.7	242.79	160.186
YPK_1344	NC_010465	complement(1481475..1483538)	209.318	190.334	263.493	225.115
YPK_1345	NC_010465	1483881..1486040	212.92	140.304	170.852	90.3825
YPK_1346	NC_010465	1486040..1487752	231.869	90.0958	170.08	77.4979
YPK_1347	NC_010465	1487780..1488592	85.7107	203.639	418.088	168.091
YPK_1348	NC_010465	1488806..1489999	233.443	131.608	211.475	238.719
YPK_RS06785	NC_010465	1489277..1489999	0	0	0	0
YPK_1349	NC_010465	complement(1490093..1490638)	38.2872	123.344	35.5736	50.058
YPK_1350	NC_010465	complement(1490866..1491504)	130.86	96.6097	60.7924	116.097
YPK_1351	NC_010465	complement(1491619..1492662)	273.658	217.713	353.487	145.859
YPK_1352	NC_010465	1493097..1493723	377.865	434.113	635.048	435.912
YPK_1353	NC_010465	1493850..1495136	292.375	165.704	294.29	233.604
YPK_1354	NC_010465	1495395..1496102	472.426	114.938	246.905	154.416
YPK_1355	NC_010465	complement(1496315..1496671)	234.228	314.406	0	207.804
YPK_1356	NC_010465	complement(1496778..1498352)	278.731	144.312	258.976	237.99
YPK_1357	NC_010465	1498593..1499657	359.864	210.785	209.734	373.954
YPK_RS06835	NC_010465	complement(1499746..1499925)	387.127	77.9465	107.906	0
YPK_1358	NC_010465	1500263..1500958	270.321	249.966	334.882	426.356
YPK_1359	NC_010465	1500962..1501381	215.685	207.115	763.053	464.824
YPK_1360	NC_010465	complement(1501625..1502095)	636.17	369.377	247.429	364.754
YPK_1361	NC_010465	complement(1502098..1502712)	271.933	415.208	252.659	165.069
YPK_1362	NC_010465	1502814..1503713	394.869	327.375	161.86	56.3987
YPK_1363	NC_010465	1503731..1504789	197.402	249.075	256.775	176.976
YPK_1364	NC_010465	1504860..1505573	263.506	282.965	394.448	240.615
YPK_1365	NC_010465	complement(1505570..1505746)	0	174.389	329.206	22.0595
YPK_1366	NC_010465	1505792..1506661	384.457	183.846	401.859	341.085
YPK_1367	NC_010465	1506755..1507207	107.678	123.888	42.8767	198.243
YPK_1368	NC_010465	1507209..1509260	234.313	57.4342	212.973	106.556
YPK_1369	NC_010465	1509383..1509508	0	0	385.38	0
YPK_1370	NC_010465	complement(1509550..1509744)	0	57.5605	199.212	200.232
YPK_1371	NC_010465	complement(1509812..1510489)	226.109	124.163	57.2955	138.213
YPK_1372	NC_010465	complement(1510486..1511613)	172.971	72.142	137.753	31.1531
YPK_1373	NC_010465	complement(1511615..1512013)	139.715	21.0983	97.3592	97.8577
YPK_1374	NC_010465	complement(1512173..1512646)	161.711	59.1999	676.123	98.8487
YPK_1375	NC_010465	1512957..1514045	358.332	141.721	481.566	294.005
YPK_1376	NC_010465	1514140..1515909	295.266	221.949	367.614	284.567
YPK_1377	NC_010465	1515902..1516972	227.722	199.124	190.423	215.095
YPK_1378	NC_010465	1517450..1519123	270.572	129.073	104.426	237.91
YPK_1379	NC_010465	1519180..1520355	580.69	121.692	569.812	252.333
YPK_1380	NC_010465	complement(1521102..1521650)	101.541	168.671	141.517	149.353
YPK_1381	NC_010465	complement(1521939..1522523)	166.762	115.121	415.025	240.278
YPK_1382	NC_010465	complement(1522754..1525885)	166.865	106.616	279.068	170.792
YPK_1383	NC_010465	1526300..1526578	49.9518	281.613	139.234	559.788
YPK_1384	NC_010465	complement(1526591..1527220)	132.729	280.607	493.287	297.488
YPK_1385	NC_010465	1528053..1528556	304.171	111.352	269.766	100.712
YPK_1386	NC_010465	1528546..1528812	0	63.0578	36.373	321.721
YPK_1387	NC_010465	1528809..1531301	134.167	97.9255	171.404	123.729
YPK_1388	NC_010465	1531384..1531851	74.4474	71.9506	290.517	41.715
YPK_1389	NC_010465	1531879..1532478	69.6828	177.718	178.046	481.558
YPK_1390	NC_010465	1532640..1533236	46.6886	155.11	211.475	156.966
YPK_1391	NC_010465	1533432..1535711	100.857	114.458	212.973	171.251
YPK_1392	NC_010465	complement(1535879..1536337)	30.3629	146.723	190.423	127.599
YPK_1393	NC_010465	complement(1536337..1537266)	269.74	102.588	20.8851	96.5635
YPK_1394	NC_010465	1537549..1537974	81.7873	171.263	45.5943	247.47
YPK_1395	NC_010465	1538445..1538861	735.262	60.5627	395.916	84.2703
YPK_1396	NC_010465	complement(1538953..1541232)	174.207	110.766	200.195	148.988
YPK_1397	NC_010465	complement(1541737..1542150)	706.927	413.455	187.663	169.762
YPK_1398	NC_010465	1542513..1543124	421.285	233.839	317.372	433.836
YPK_1399	NC_010465	1543302..1544201	193.563	236.957	129.488	221.256
YPK_1400	NC_010465	complement(1544299..1545192)	46.767	87.886	43.4523	222.741
YPK_1401	NC_010465	complement(1545255..1545956)	198.526	63.9561	83.005	228.042
YPK_1402	NC_010465	1546046..1546141	0	58.4599	202.325	0
YPK_1403	NC_010465	complement(1546281..1547252)	824.436	72.1727	289.749	160.68
YPK_1404	NC_010465	1547521..1548393	79.8199	157.5	155.741	254.935
YPK_1405	NC_010465	1548475..1548945	236.714	154.9	659.81	273.565
YPK_1406	NC_010465	1549134..1550012	380.52	150.04	99.436	111.05
YPK_1407	NC_010465	1550617..1552149	281.822	106.166	310.416	173.195
YPK_1408	NC_010465	1552482..1553519	261.814	159.497	271.326	105.324
YPK_1409	NC_010465	1553519..1554352	267.368	74.0211	419.205	84.2703
YPK_1410	NC_010465	1554352..1555227	222.73	147.351	243.898	93.6016
YPK_1411	NC_010465	1555217..1556308	216.961	66.8113	151.188	64.3603
YPK_1412	NC_010465	1556479..1557357	182.333	201.118	353.55	204.332
YPK_1413	NC_010465	1557603..1558835	226.059	136.549	228.415	193.168
YPK_1414	NC_010465	complement(1559216..1559923)	108.264	158.535	274.339	220.595
YPK_1415	NC_010465	complement(1559920..1561464)	401.409	147.115	282.862	379.08
YPK_1416	NC_010465	complement(1561697..1563115)	255.356	130.515	82.1276	264.154
YPK_1417	NC_010465	1563817..1564998	601.324	161.432	353.298	241.142
YPK_1418	NC_010465	1565032..1566252	388.078	91.927	294.29	239.836
YPK_1419	NC_010465	1566395..1566592	563.093	99.2046	343.339	197.198
YPK_1420	NC_010465	1566589..1568049	248.015	205.51	299.125	211.128
YPK_1421	NC_010465	1568109..1569755	291.932	173.782	459.929	208.621
YPK_1422	NC_010465	complement(1570010..1572046)	126.572	132.245	209.774	153.344
YPK_1423	NC_010465	complement(1572050..1573255)	75.1141	148.913	209.371	294.62
YPK_1424	NC_010465	1573443..1574126	305.626	217.43	141.982	268.293
YPK_1425	NC_010465	1574152..1575501	263.246	157.972	208.619	240.056
YPK_1426	NC_010465	complement(1575702..1576211)	54.6532	1810.19	152.339	987.615
YPK_1427	NC_010465	complement(1576260..1577987)	185.498	2206.86	157.364	1226.94
YPK_1428	NC_010465	complement(1578036..1578293)	648.212	4850.81	376.418	2330.61
YPK_1429	NC_010465	complement(1578792..1579760)	100.677	361.981	90.2005	294.149
YPK_1430	NC_010465	complement(1579917..1580651)	284.42	129.805	79.2782	207.179
YPK_1431	NC_010465	1580900..1581886	42.3604	235.972	88.5555	225.489
YPK_1432	NC_010465	1581977..1583989	252.7	171.459	342.535	178.448
YPK_1433	NC_010465	1584009..1584224	193.563	155.893	809.299	126.536
YPK_1434	NC_010465	complement(1584325..1584672)	400.476	96.7611	279.068	280.497
YPK_1435	NC_010465	complement(1584804..1585409)	114.988	83.3487	48.0771	32.2155
YPK_1437	NC_010465	complement(1586063..1587478)	152.554	164.48	260.622	104.782
YPK_1438	NC_010465	complement(1589137..1590321)	529.236	293.631	163.909	240.532
YPK_1439	NC_010465	1590772..1592001	226.611	355.892	126.33	238.081
YPK_1440	NC_010465	complement(1592094..1592507)	50.4948	237.228	351.869	198.056
YPK_1441	NC_010465	complement(1592678..1593667)	443.436	317.455	294.29	351.013
YPK_1442	NC_010465	complement(1593803..1594681)	110.985	130.886	154.678	57.7461
YPK_1443	NC_010465	1594784..1595260	394.431	135.303	203.597	458.393
YPK_1444	NC_010465	1595441..1596412	100.366	129.911	39.9654	96.408
YPK_1445	NC_010465	complement(1596490..1597737)	94.9205	137.156	62.2537	131.402
YPK_1446	NC_010465	1598003..1599238	28.1888	84.0006	141.431	53.703
YPK_1447	NC_010465	1599502..1600026	278.731	85.5184	36.9965	96.6835
YPK_1448	NC_010465	complement(1600121..1600552)	129.042	38.9732	134.883	63.2678
YPK_1449	NC_010465	1601142..1601813	539.212	242.191	187.873	302.136
YPK_1450	NC_010465	1601840..1602196	19.519	31.4406	0	87.4963
YPK_1451	NC_010465	1602193..1602849	84.8497	42.7104	103.472	95.0873
YPK_1452	NC_010465	complement(1603095..1603664)	97.8004	137.842	136.303	219.201
YPK_1453	NC_010465	complement(1603661..1604257)	46.6886	169.21	520.554	353.173
YPK_1454	NC_010465	complement(1604739..1605515)	26.9046	50.5599	124.988	155.779
YPK_1455	NC_010465	complement(1605517..1606134)	11.2755	136.217	125.716	50.544
YPK_1456	NC_010465	complement(1606146..1608572)	149.3	110.994	168.062	148.008
YPK_1457	NC_010465	1609403..1610251	402.174	247.886	846.475	262.141
YPK_1458	NC_010465	1610358..1610603	113.305	34.2204	0	63.4882
YPK_1459	NC_010465	complement(1610481..1610960)	203.241	99.3818	445.114	138.285
YPK_1460	NC_010465	1611426..1611950	0	192.416	0	171.055
YPK_1461	NC_010465	complement(1612023..1613072)	132.729	85.5184	231.228	122.714
YPK_1462	NC_010465	complement(1613069..1614655)	144.898	182.121	195.823	241.111
YPK_1463	NC_010465	complement(1614711..1615730)	122.97	145.806	133.296	413.42
YPK_1464	NC_010465	1616059..1617153	133.638	133.256	88.6903	167.591
YPK_1465	NC_010465	1618395..1618997	612.469	51.1887	628.112	440.311
YPK_1466	NC_010465	complement(1619370..1619852)	490.521	104.574	140.748	210.181
YPK_1467	NC_010465	complement(1619849..1621531)	165.616	106.707	144.26	169.358
YPK_1468	NC_010465	complement(1621532..1622233)	119.116	91.9369	83.005	183.546
YPK_1469	NC_010465	complement(1622230..1623567)	239.567	102.764	137.907	210.109
YPK_1470	NC_010465	complement(1623607..1624638)	519.92	125.077	442.291	204.306
YPK_1471	NC_010465	complement(1624645..1625838)	227.607	199.762	130.138	65.4024
YPK_1472	NC_010465	complement(1625937..1626962)	393.918	125.808	293.43	216.918
YPK_1473	NC_010465	complement(1626962..1628842)	329.706	146.196	118.749	128.698
YPK_1474	NC_010465	1629626..1632283	343.433	92.9023	164.417	167.463
YPK_1475	NC_010465	1632494..1633039	25.5248	205.573	71.1471	71.5114
YPK_1476	NC_010465	1633196..1633957	54.8683	106.793	76.4692	92.2329
YPK_RS07450	NC_010465	1634085..1635623	271.668	109.399	170.379	182.668
YPK_RS07455	NC_010465	1635615..1636757	414.561	247.956	433.325	273.283
YPK_1478	NC_010465	1636742..1637350	205.959	124.407	749.498	346.214
YPK_1479	NC_010465	1637456..1637980	610.554	42.7592	92.4913	89.2463
YPK_1480	NC_010465	1638004..1639506	171.541	126.955	323.073	106.511
YPK_1481	NC_010465	1639755..1640324	293.401	83.6899	851.893	397.302
YPK_1482	NC_010465	1640577..1641137	434.741	135.052	536.647	125.279
YPK_1483	NC_010465	1641141..1642490	113.557	89.3786	79.1314	295.008
YPK_1484	NC_010465	1642487..1643863	50.6048	118.193	197.476	107.75
YPK_1485	NC_010465	1643872..1647699	271.231	124.617	185.2	146.879
YPK_1486	NC_010465	1648026..1650794	269.269	159.102	224.464	260.866
YPK_1487	NC_010465	1650893..1651153	53.3968	53.7562	0	29.9197
YPK_1488	NC_010465	1651153..1652001	393.966	185.088	183.022	280.537
YPK_1489	NC_010465	1652021..1652827	319.487	163.427	758.153	420.934
YPK_1490	NC_010465	1652892..1653371	145.172	175.38	0	48.8066
YPK_1491	NC_010465	1653396..1653743	300.357	362.854	167.441	269.278
YPK_1492	NC_010465	complement(1653818..1654159)	122.251	172.303	113.586	137.001
YPK_1493	NC_010465	complement(1654535..1656574)	133.217	277.856	385.607	480.41
YPK_1494	NC_010465	complement(1656579..1657121)	461.985	170.535	143.08	122.241
YPK_1495	NC_010465	1657738..1658205	0	107.926	560.284	216.918
YPK_1496	NC_010465	1658650..1659306	212.124	111.047	177.381	178.289
YPK_1497	NC_010465	1659276..1659935	63.348	170.065	206.003	224.806
YPK_1498	NC_010465	1659998..1660735	424.895	171.102	92.1153	190.465
YPK_1499	NC_010465	1660732..1661034	91.9905	9.26097	0	167.521
YPK_1500	NC_010465	1661031..1661525	28.1547	175.734	156.955	189.31
YPK_1501	NC_010465	1661522..1663492	300.509	125.284	221.726	172.346
YPK_1502	NC_010465	1663489..1664055	417.851	138.572	222.664	165.271
YPK_1503	NC_010465	1664052..1664564	149.417	65.6391	151.448	68.5004
YPK_1504	NC_010465	1664564..1665790	352.105	235.555	379.915	216.388
YPK_1505	NC_010465	1665826..1666590	264.157	66.0252	304.677	214.366
YPK_1506	NC_010465	complement(1666697..1667962)	313.738	121.907	490.949	308.414
YPK_1507	NC_010465	1668376..1668672	375.395	576.332	163.495	985.991
YPK_1508	NC_010465	1668959..1670269	47.8372	128.424	103.709	154.871
YPK_1509	NC_010465	1670269..1672593	182.824	188.278	167.081	183.051
YPK_1510	NC_010465	1673049..1673207	175.303	70.593	0	24.5568
YPK_1511	NC_010465	1673194..1673670	116.868	111.772	488.633	163.712
YPK_1512	NC_010465	complement(1673922..1674533)	466.829	187.989	269.766	197.778
YPK_1513	NC_010465	1674822..1675754	171.78	114.288	124.908	238.54
YPK_1514	NC_010465	1675831..1676916	365.738	209.293	393.471	240.887
YPK_1515	NC_010465	1676943..1677749	77.7131	73.0205	60.1709	193.533
YPK_1516	NC_010465	1677753..1678559	138.157	97.3607	96.2734	266.108
YPK_1517	NC_010465	1678659..1679201	153.995	242.883	71.5402	186.957
YPK_1518	NC_010465	1679259..1679537	349.663	352.016	278.468	279.894
YPK_1519	NC_010465	complement(1679715..1681784)	104.356	100.314	65.6822	101.857
YPK_1520	NC_010465	1681956..1683179	364.354	249.887	333.241	207.348
YPK_1521	NC_010465	complement(1683587..1684282)	430.511	44.3489	139.534	100.979
YPK_1522	NC_010465	1685070..1685600	131.229	158.535	621.834	132.357
YPK_1523	NC_010465	complement(1686127..1687164)	375.938	167.607	74.8484	199.364
YPK_1524	NC_010465	complement(1687449..1688366)	242.903	207.857	148.107	195.652
YPK_RS07695	NC_010465	1688444..1688605	0	0	0	0
YPK_1526	NC_010465	1688592..1689377	106.386	142.803	123.557	283.153
YPK_1527	NC_010465	1689424..1690551	117.373	111.944	352.992	145.381
YPK_1528	NC_010465	1690721..1691731	41.3548	124.899	192.118	247.171
YPK_1529	NC_010465	1691731..1692612	47.4033	104.989	154.152	163.795
YPK_1530	NC_010465	1692769..1693431	252.245	194.69	351.551	300.348
YPK_1531	NC_010465	1693662..1694576	137.081	331.209	286.571	200.56
YPK_1532	NC_010465	1694825..1696129	165.53	281.682	238.138	119.679
YPK_1533	NC_010465	1696249..1696986	292.705	254.752	184.231	306.86
YPK_1534	NC_010465	1697314..1697823	532.868	275.105	285.635	558.883
YPK_1535	NC_010465	1697836..1699353	569.214	251.4	159.94	221.205
YPK_1536	NC_010465	1699614..1700186	72.9663	112.635	101.692	129.469
YPK_1537	NC_010465	complement(1700183..1700290)	0	103.929	0	72.306
YPK_1538	NC_010465	1700733..1701515	71.1957	129.015	24.8061	294.211
YPK_1539	NC_010465	1701611..1702297	446.294	138.874	169.635	250.071
YPK_1540	NC_010465	1702294..1703010	379.028	109.582	162.537	152.478
YPK_1541	NC_010465	1703024..1703821	183.376	218.016	170.379	166.358
YPK_1542	NC_010465	complement(1703945..1704853)	383.294	98.7837	181.625	90.2035
YPK_1543	NC_010465	1705207..1705899	160.884	80.9834	504.498	202.832
YPK_1544	NC_010465	1706087..1706638	176.732	208.422	316.682	99.0278
YPK_1545	NC_010465	1706860..1707408	190.39	204.45	35.3792	149.353
YPK_1546	NC_010465	complement(1707525..1708781)	277.179	205.377	309.04	242.286
YPK_1547	NC_010465	complement(1708794..1709081)	96.7816	19.4866	0	0
YPK_1548	NC_010465	complement(1709250..1709693)	94.1659	126.4	196.856	17.5879
YPK_1549	NC_010465	1710060..1711094	350.097	73.2019	150.131	116.947
YPK_1550	NC_010465	complement(1711361..1713514)	122.932	171.96	144.276	270.09
YPK_1551	NC_010465	complement(1713682..1714884)	260.659	310.231	234.111	292.109
YPK_RS07825	NC_010465	complement(1714874..1715065)	0	0	0	162.689
YPK_1552	NC_010465	1715306..1715761	244.501	166.149	212.973	205.501
YPK_1553	NC_010465	1716069..1716563	197.083	589.559	274.671	236.638
YPK_1554	NC_010465	1716729..1717385	63.6372	115.318	266.071	71.3155
YPK_1555	NC_010465	1717677..1719509	266.11	183.704	333.786	232.184
YPK_1556	NC_010465	1719933..1720175	200.732	46.1905	0	96.408
YPK_1557	NC_010465	complement(1720222..1720815)	715.598	203.133	376.038	328.664
YPK_1558	NC_010465	complement(1720966..1722180)	309.701	210.167	95.9169	170.321
YPK_1559	NC_010465	1723035..1723967	253.935	171.432	239.407	292.944
YPK_1560	NC_010465	1724645..1725145	305.992	280.047	426.457	529.955
YPK_1561	NC_010465	1725247..1725924	154.165	326.961	71.6193	143.972
YPK_1562	NC_010465	1726067..1727863	135.721	229.545	199.96	297.674
YPK_1563	NC_010465	1727866..1728429	197.682	248.765	516.574	221.533
YPK_1564	NC_010465	1728426..1729811	65.359	212.581	196.194	295.797
YPK_1565	NC_010465	1729898..1732642	76.1561	98.1359	141.517	75.3879
YPK_1566	NC_010465	1732639..1733616	85.5004	97.5526	426.992	187.641
YPK_1567	NC_010465	1733631..1734173	641.646	201.541	35.7701	330.77
YPK_1568	NC_010465	1734186..1734731	395.635	195.294	355.736	214.534
YPK_1569	NC_010465	1734728..1735030	597.938	129.654	128.206	141.748
YPK_1570	NC_010465	1735027..1736871	154.851	117.11	205.285	167.186
YPK_1571	NC_010465	1736911..1738443	322.732	140.944	392.771	213.947
YPK_1572	NC_010465	1738450..1739913	233.228	122.67	106.138	157.354
YPK_1573	NC_010465	1740149..1741228	264.537	23.3839	143.875	68.6907
YPK_1574	NC_010465	complement(1741700..1742167)	29.779	155.893	186.761	225.261
YPK_1575	NC_010465	complement(1742245..1742781)	272.503	141.087	144.679	14.542
YPK_1576	NC_010465	complement(1742830..1743699)	168.2	238.677	535.811	282.741
YPK_1577	NC_010465	complement(1744353..1745636)	173.664	131.125	219.343	161.168
YPK_1578	NC_010465	1746105..1747097	435.079	279.76	440.102	259.515
YPK_1579	NC_010465	1747561..1748511	73.2732	88.5197	541.234	69.797
YPK_1580	NC_010465	1748874..1750190	343.917	164.06	405.571	163.059
YPK_1581	NC_010465	1750220..1750735	216.071	76.1338	112.925	234.574
YPK_1582	NC_010465	1750745..1752601	210.137	129.953	141.202	149.284
YPK_RS07995	NC_010465	1752667..1752879	65.4298	26.3481	91.1886	0
YPK_1584	NC_010465	complement(1752820..1752963)	0	0	0	54.2295
YPK_1585	NC_010465	1753531..1753839	405.919	308.759	848.585	429.624
YPK_1586	NC_010465	1754394..1755038	43.2141	100.062	240.907	78.6958
YPK_1587	NC_010465	1755291..1755386	0	0	0	162.689
YPK_1588	NC_010465	1755611..1756978	300.532	155.893	170.379	171.251
YPK_1589	NC_010465	1757206..1758909	8.17873	72.4573	91.1886	128.318
YPK_1590	NC_010465	1758906..1759724	323.315	41.1146	142.294	81.0463
YPK_1591	NC_010465	1759738..1760595	81.2154	85.0325	147.145	77.3624
YPK_1592	NC_010465	1760595..1761566	43.0141	106.816	159.861	80.34
YPK_1593	NC_010465	1761554..1762969	93.5009	134.755	96.0185	57.9061
YPK_1594	NC_010465	1763035..1763994	108.879	78.9208	60.6974	166.756
YPK_1595	NC_010465	complement(1764376..1764636)	0	172.02	0	119.679
YPK_1596	NC_010465	1764969..1765934	201.979	119.098	170.908	101.049
YPK_RS08060	NC_010465	complement(1766115..1766198)	0	33.4056	0	46.4824
YPK_1597	NC_010465	1766700..1768004	234.946	94.6109	66.9764	197.47
YPK_1598	NC_010465	complement(1768232..1768954)	327.692	155.246	308.944	129.611
YPK_1599	NC_010465	complement(1768951..1769607)	137.881	85.4208	251.289	160.46
YPK_1600	NC_010465	complement(1769642..1770385)	74.9277	124.463	78.3192	257.153
YPK_RS08085	NC_010465	1770712..1770957	1274.69	148.288	78.956	365.057
YPK_1601	NC_010465	complement(1770954..1772081)	234.747	129.358	111.924	280.378
YPK_1602	NC_010465	complement(1772401..1772904)	124.434	395.3	327.573	294.389
YPK_1603	NC_010465	complement(1773161..1773937)	188.332	101.12	74.9929	130.653
YPK_1604	NC_010465	complement(1773960..1774457)	0	22.5387	0	203.851
YPK_1605	NC_010465	complement(1774473..1775360)	298.192	88.4798	240.602	162.689
YPK_1606	NC_010465	1775765..1776289	278.731	112.243	166.484	260.302
YPK_1607	NC_010465	1776605..1777543	163.261	137.465	206.849	124.745
YPK_1608	NC_010465	1777781..1778323	320.823	72.3481	178.851	115.05
YPK_1609	NC_010465	1778517..1779179	557.042	427.471	688.453	659.588
YPK_1610	NC_010465	1779850..1781076	289.635	130.355	395.745	280.031
YPK_1611	NC_010465	1781251..1782168	197.359	73.3614	84.6325	42.5329
YPK_1612	NC_010465	1782225..1783715	102.818	178.791	286.593	170.217
YPK_1613	NC_010465	1783712..1784704	266.661	245.849	185.821	290.972
YPK_1614	NC_010465	complement(1784854..1785858)	277.344	122.853	164.276	322.463
YPK_1615	NC_010465	complement(1786229..1787170)	96.1652	187.667	164.953	203.102
YPK_1616	NC_010465	1787273..1788358	102.663	113.69	214.621	165.385
YPK_1617	NC_010465	1788497..1788610	0	196.917	0	0
YPK_1618	NC_010465	1788976..1790622	126.927	149.93	200.482	403.017
YPK_1619	NC_010465	1790739..1791863	185.821	112.243	103.59	152.71
YPK_1620	NC_010465	1791959..1792924	353.463	145.242	261.388	234.433
YPK_1621	NC_010465	1793572..1795260	144.399	139.556	166.747	171.069
YPK_1622	NC_010465	1795416..1803053	168.779	90.3763	120.791	130.355
YPK_1623	NC_010465	1803050..1803364	132.729	97.9899	0	148.744
YPK_1624	NC_010465	1803665..1803931	0	84.0771	0	160.861
YPK_RS08210	NC_010465	1804211..1804900	0	166.738	197.047	175.421
YPK_1626	NC_010465	1805230..1805451	188.332	0	0	17.5879
YPK_1627	NC_010465	complement(1805496..1805651)	89.3369	35.9753	0	300.348
YPK_1628	NC_010465	complement(1805723..1806124)	86.6701	27.9211	0	165.117
YPK_1629	NC_010465	1806243..1806662	265.458	233.839	832.421	260.302
YPK_1630	NC_010465	1806703..1807233	104.983	105.69	73.1569	286.773
YPK_1631	NC_010465	complement(1807498..1808577)	238.728	158.491	386.665	108.459
YPK_1632	NC_010465	complement(1808677..1810065)	245.821	145.455	55.9342	230.505
YPK_1633	NC_010465	complement(1810082..1811122)	120.489	123.996	158.595	116.273
YPK_1634	NC_010465	1811394..1812680	254.475	130.819	369.749	242.705
YPK_1635	NC_010465	1812789..1813664	71.5919	41.6426	277.157	213.947
YPK_1636	NC_010465	1813665..1814489	320.963	91.8351	306.062	312.362
YPK_1637	NC_010465	1814636..1815691	184.765	167.408	55.1794	203.361
YPK_1638	NC_010465	1815718..1816656	267.154	158.383	144.795	282.756
YPK_1639	NC_010465	1816779..1817894	156.099	158.407	278.468	286.892
YPK_1640	NC_010465	1817933..1819207	81.9798	114.444	129.488	180.68
YPK_1641	NC_010465	complement(1819765..1821009)	190.298	74.3778	538.232	103.493
YPK_1642	NC_010465	1823010..1823249	0	0	0	0
YPK_1643	NC_010465	complement(1823662..1824222)	173.896	35.0134	0	13.9199
YPK_1644	NC_010465	1824498..1825478	213.097	74.3709	296.99	171.146
YPK_1645	NC_010465	1825475..1828762	78.4143	74.2483	162.45	129.438
YPK_1646	NC_010465	1828918..1830264	139.676	99.9937	165.825	78.2644
YPK_1647	NC_010465	1830261..1831211	175.856	94.421	20.4239	135.488
YPK_1648	NC_010465	1831229..1832233	166.407	53.0501	154.612	159.289
YPK_1649	NC_010465	1832244..1832798	451.996	91.0078	139.987	63.3166
YPK_1650	NC_010465	complement(1832876..1833895)	259.603	192.574	228.508	122.495
YPK_1651	NC_010465	complement(1833906..1834409)	82.9557	167.028	173.421	286.642
YPK_1652	NC_010465	complement(1834456..1835814)	394.818	177.573	393.037	264.324
YPK_1653	NC_010465	1835938..1836147	0	0	554.948	148.744
YPK_1654	NC_010465	1836262..1837188	112.755	121.082	10.4764	80.028
YPK_1655	NC_010465	1837676..1838413	406.011	117.87	394.78	137.558
YPK_1656	NC_010465	complement(1838406..1839050)	162.053	104.412	180.681	187.659
YPK_1657	NC_010465	1839481..1840407	338.266	130.163	398.102	311.688
YPK_1658	NC_010465	complement(1840539..1842266)	225.824	202.986	101.162	219.178
YPK_1659	NC_010465	complement(1842610..1842855)	169.958	0	78.956	15.872
YPK_1660	NC_010465	complement(1843415..1843798)	254.052	102.305	354.068	315.209
YPK_1661	NC_010465	1844284..1845870	201.979	189.193	385.526	199.286
YPK_1662	NC_010465	1845863..1848472	160.19	130.09	137.674	124.167
YPK_RS08385	NC_010465	1848604..1848837	327.569	23.9835	249.015	33.372
YPK_1664	NC_010465	complement(1849016..1850554)	285.251	116.692	227.172	114.167
YPK_1665	NC_010465	complement(1851258..1852178)	491.789	246.788	179.258	182.296
YPK_1666	NC_010465	1853113..1853277	168.928	272.104	117.716	47.3276
YPK_1667	NC_010465	1853464..1853592	0	43.505	752.836	121.071
YPK_1668	NC_010465	1853636..1854703	84.8199	160.272	300.077	255.914
YPK_1669	NC_010465	1854852..1855910	282.942	127.187	183.41	324.455
YPK_1670	NC_010465	complement(1856025..1856138)	0	49.2294	0	34.2502
YPK_1671	NC_010465	complement(1856482..1857066)	35.7348	115.121	332.02	73.4184
YPK_1672	NC_010465	complement(1857333..1858448)	137.368	85.4897	78.3192	122.454
YPK_1673	NC_010465	complement(1858699..1858953)	382.572	374.143	304.677	566.539
YPK_RS08440	NC_010465	1859132..1859260	0	0	301.134	60.5353
YPK_1674	NC_010465	complement(1859459..1859704)	1161.38	239.543	78.956	142.848
YPK_1675	NC_010465	complement(1860017..1861063)	39.9328	125.965	74.205	152.899
YPK_1676	NC_010465	1861298..1861585	338.736	409.219	606.974	393.164
YPK_1677	NC_010465	complement(1861843..1865493)	104.973	179.847	207.478	217.096
YPK_1678	NC_010465	1866068..1867030	246.024	142.78	201.694	40.5454
YPK_1679	NC_010465	1867250..1867708	0	36.6807	0	0
YPK_1680	NC_010465	complement(1867846..1868442)	0	89.3055	97.6038	39.2414
YPK_1681	NC_010465	1868584..1869108	238.912	801.735	406.962	416.483
YPK_1682	NC_010465	1869121..1869288	0	150.325	0	0
YPK_1683	NC_010465	1869322..1870356	383.76	225.028	206.43	294.254
YPK_1684	NC_010465	1870363..1871313	175.856	153.434	408.479	139.594
YPK_1685	NC_010465	1871351..1872280	149.855	322.849	187.966	323.278
YPK_1686	NC_010465	1872294..1873028	94.8065	484.859	79.2782	180.617
YPK_1687	NC_010465	1873182..1873418	205.814	651.198	163.909	906.113
YPK_1688	NC_010465	1873513..1874754	129.042	185.264	336.23	216.918
YPK_1689	NC_010465	1875116..1875922	86.3479	142.564	72.2051	198.371
YPK_1690	NC_010465	1876211..1877236	210.543	235.207	302.895	140.806
YPK_1691	NC_010465	1877226..1877864	196.29	79.0443	182.377	12.2207
YPK_1692	NC_010465	1877864..1878886	190.725	71.3176	180.372	72.518
YPK_1693	NC_010465	1878901..1879710	86.0281	159.357	371.678	130.151
YPK_1694	NC_010465	1880016..1881449	354.731	665.317	243.805	492.83
YPK_1695	NC_010465	1881829..1882647	110.608	167.885	450.598	224.069
YPK_1696	NC_010465	1882821..1883174	610.217	229.876	0	33.0892
YPK_1697	NC_010465	1883209..1883598	107.204	115.121	0	70.0812
YPK_1698	NC_010465	1883639..1884214	133.075	87.6898	118.023	54.2295
YPK_1699	NC_010465	1884195..1885061	112.521	74.4402	100.812	108.084
YPK_1700	NC_010465	1885132..1886163	249.832	111.482	75.2836	79.4525
YPK_1701	NC_010465	1886291..1886833	115.496	248.051	321.931	431.439
YPK_1702	NC_010465	1887208..1888512	277.663	172.02	223.255	125.663
YPK_1703	NC_010465	1889041..1889745	168.029	210.953	165.304	138.458
YPK_1704	NC_010465	1889753..1890166	201.979	108.447	469.159	207.487
YPK_1705	NC_010465	1890477..1891016	103.234	114.321	287.751	274.763
YPK_1706	NC_010465	complement(1891256..1894702)	183.961	142.461	143.687	174.441
YPK_1707	NC_010465	1894972..1896174	266.451	111.963	32.2912	116.844
YPK_1708	NC_010465	1896167..1896871	118.609	191.052	110.202	116.305
YPK_1709	NC_010465	1896871..1898118	106.088	155.143	264.578	103.245
YPK_1710	NC_010465	1898137..1899051	137.081	168.671	201.661	213.362
YPK_1711	NC_010465	1899100..1899936	124.88	214.562	614.951	135.282
YPK_1712	NC_010465	1900266..1901501	417.195	272.434	196.432	284.31
YPK_1713	NC_010465	complement(1901751..1902872)	99.3694	122.547	242.357	257.518
YPK_1714	NC_010465	complement(1902956..1904362)	133.72	113.679	248.484	227.556
YPK_1715	NC_010465	complement(1904416..1905087)	342.192	116.92	57.807	58.103
YPK_1716	NC_010465	complement(1905298..1905876)	48.1401	87.2354	301.914	303.46
YPK_1717	NC_010465	complement(1905916..1906083)	207.389	233.839	115.614	325.377
YPK_1718	NC_010465	complement(1906113..1907483)	15.2479	149.412	120.421	136.701
YPK_1719	NC_010465	complement(1907544..1908170)	244.501	161.114	154.89	0
YPK_1720	NC_010465	complement(1908228..1909343)	156.099	186.066	321.979	150.443
YPK_1721	NC_010465	complement(1909530..1909976)	0	182.049	86.9045	69.8796
YPK_1722	NC_010465	complement(1909969..1910595)	111.137	210.344	154.89	323.82
YPK_1723	NC_010465	1910726..1911979	272.285	228.245	278.801	376.752
YPK_1724	NC_010465	complement(1912121..1913167)	159.731	243.89	667.845	358.008
YPK_1725	NC_010465	complement(1913427..1913687)	53.3968	10.7512	260.464	29.9197
YPK_1726	NC_010465	complement(1913807..1915387)	290.896	131.341	178.138	170.406
YPK_1727	NC_010465	complement(1916307..1917164)	48.7292	127.549	90.5509	104.667
YPK_1728	NC_010465	1917300..1917707	187.87	206.329	47.6058	287.097
YPK_RS08715	NC_010465	1917765..1917932	0	0	924.913	92.9649
YPK_1729	NC_010465	complement(1917935..1918027)	0	120.691	0	41.9841
YPK_1730	NC_010465	1918239..1919564	36.7858	103.694	131.831	241.456
YPK_1731	NC_010465	complement(1919866..1920069)	307.424	3658.9	190.423	1512.05
YPK_1732	NC_010465	complement(1920372..1921271)	263.246	93.5358	183.441	160.519
YPK_1733	NC_010465	complement(1921363..1921812)	247.761	187.072	86.3252	312.362
YPK_1734	NC_010465	1922134..1922283	46.4552	0	0	52.0603
YPK_1735	NC_010465	complement(1922323..1922856)	156.591	204.938	254.611	380.216
YPK_1736	NC_010465	1923025..1923186	516.169	138.572	239.792	48.204
YPK_1737	NC_010465	complement(1923139..1924149)	344.623	222.043	57.6355	223.998
YPK_1738	NC_010465	complement(1924253..1924396)	0	155.893	134.883	108.459
YPK_1739	NC_010465	complement(1924556..1927756)	241.637	155.162	257.883	253.715
YPK_1740	NC_010465	1928297..1928509	98.1448	0	91.1886	348.291
YPK_1741	NC_010465	1928724..1928915	435.517	146.15	202.325	122.016
YPK_1742	NC_010465	complement(1929098..1930837)	96.1142	88.6977	117.209	100.979
YPK_RS08770	NC_010465	1931435..1931611	39.3688	0	0	44.1189
YPK_1743	NC_010465	1931963..1932661	189.41	148.533	97.2548	139.647
YPK_1744	NC_010465	1933046..1935745	283.893	201.622	248.185	293.562
YPK_1745	NC_010465	1936933..1937283	238.232	71.9506	276.683	66.744
YPK_1746	NC_010465	1937287..1937868	71.8379	260.357	100.119	93.9233
YPK_1747	NC_010465	1938073..1938960	94.1659	142.2	131.238	131.91
YPK_1748	NC_010465	1938957..1940312	308.331	113.816	222.02	198.682
YPK_1749	NC_010465	1940323..1942506	201.008	172.167	137.848	237.776
YPK_1750	NC_010465	1942669..1943166	349.813	304.273	624.037	297.936
YPK_1751	NC_010465	1943786..1946650	204.306	150.833	311.855	179.894
YPK_1752	NC_010465	1946719..1947420	277.937	211.855	332.02	283.662
YPK_1753	NC_010465	1947661..1949334	353.825	176.008	290.071	258.902
YPK_1756	NC_010465	1951300..1952187	164.79	41.0799	174.983	123.116
YPK_1757	NC_010465	1952187..1953236	99.5468	77.5011	110.99	145.025
YPK_1758	NC_010465	1953337..1953726	303.745	302.192	49.803	640.742
YPK_1759	NC_010465	1953736..1954380	129.642	73.9585	120.454	193.713
YPK_RS08855	NC_010465	complement(1954694..1954813)	0	23.3839	0	0
YPK_1760	NC_010465	1954937..1955701	273.266	124.714	76.1693	270.51
YPK_1761	NC_010465	1956058..1958688	105.941	45.8613	177.178	43.0373
YPK_1762	NC_010465	1958788..1959741	452.865	188.248	254.496	184.176
YPK_1763	NC_010465	1960041..1960214	440.523	80.6343	390.696	157.079
YPK_1764	NC_010465	complement(1960360..1961589)	181.289	207.604	260.555	333.313
YPK_1765	NC_010465	complement(1961991..1962185)	35.7348	86.3407	99.606	40.0464
YPK_1766	NC_010465	1962211..1962330	0	46.7679	0	0
YPK_1767	NC_010465	1962734..1962982	55.9701	214.118	624.037	172.489
YPK_1768	NC_010465	1963375..1964631	105.328	162.962	100.438	189.48
YPK_1769	NC_010465	1964786..1965019	119.116	143.901	83.005	100.116
YPK_1770	NC_010465	1965302..1965475	800.952	64.5074	0	538.555
YPK_1771	NC_010465	1965827..1966216	0	489.264	99.606	480.557
YPK_1772	NC_010465	complement(1966326..1966565)	348.414	210.455	161.86	32.5377
YPK_1773	NC_010465	complement(1966773..1967762)	133.735	85.0325	333.529	185.366
YPK_1774	NC_010465	complement(1967968..1970415)	256.187	104.311	337.208	247.223
YPK_1775	NC_010465	complement(1970518..1971270)	185.08	171.42	245.047	134.818
YPK_1776	NC_010465	complement(1971301..1971858)	324.687	95.5473	295.873	97.963
YPK_1777	NC_010465	complement(1971879..1972409)	39.3688	52.8451	256.049	250.007
YPK_1778	NC_010465	complement(1972415..1972969)	37.6664	91.0078	209.98	70.3518
YPK_1779	NC_010465	complement(1973450..1976080)	219.828	142.917	132.884	155.825
YPK_1780	NC_010465	complement(1976049..1977401)	144.207	147.251	165.09	251.067
YPK_1781	NC_010465	1977528..1978025	265.858	225.387	39.0023	172.489
YPK_1782	NC_010465	1978121..1978834	146.392	522.7	190.423	404.671
YPK_1783	NC_010465	1978854..1980932	63.6832	286.141	233.564	191.564
YPK_1784	NC_010465	1981388..1982269	79.0054	139.986	187.185	123.953
YPK_1785	NC_010465	complement(1982205..1982393)	73.7384	148.469	0	82.6354
YPK_1786	NC_010465	1982928..1983470	25.6659	93.019	107.31	287.626
YPK_1787	NC_010465	1983606..1984385	232.276	100.731	311.269	200.232
YPK_1788	NC_010465	1984467..1987079	320.013	123.497	196.982	137.473
YPK_1789	NC_010465	1987076..1988239	155.649	110.893	333.731	254.935
YPK_1790	NC_010465	1988236..1989039	225.342	205.918	410.689	237.962
YPK_1791	NC_010465	complement(1989093..1990460)	203.751	141.534	35.4956	148.418
YPK_1792	NC_010465	1990827..1991993	179.133	161.103	399.448	374.727
YPK_1793	NC_010465	1992180..1992971	175.967	226.753	245.242	285.937
YPK_1794	NC_010465	1993338..1994189	130.86	115.273	68.3914	123.735
YPK_1795	NC_010465	complement(1994403..1995794)	115.137	126.999	244.185	224.398
YPK_1796	NC_010465	complement(1995998..1996546)	330.01	46.0012	123.827	376.939
YPK_1797	NC_010465	complement(1997044..1997754)	117.608	102.613	464.408	263.597
YPK_1798	NC_010465	complement(1998052..1999344)	560.48	173.616	217.816	202.323
YPK_1799	NC_010465	complement(1999360..2000487)	55.598	87.0679	249.677	245.763
YPK_1800	NC_010465	complement(2000501..2001421)	90.7919	201.087	263.615	309.479
YPK_1801	NC_010465	complement(2001414..2002304)	297.188	141.721	403.287	192.816
YPK_1802	NC_010465	complement(2002345..2004012)	267.368	105.985	209.603	231.743
YPK_1803	NC_010465	complement(2004357..2005118)	36.5789	81.0152	305.877	87.1088
YPK_1804	NC_010465	complement(2005210..2006046)	266.41	154.217	81.2199	345.203
YPK_1805	NC_010465	2006382..2006714	167.406	252.799	87.4917	246.231
YPK_1806	NC_010465	complement(2006761..2007969)	0	324.938	0	67.8205
YPK_1807	NC_010465	complement(2008017..2008208)	0	0	0	0
YPK_1808	NC_010465	complement(2008509..2009174)	491.755	105.333	29.1639	340.034
YPK_1809	NC_010465	2009585..2010139	527.329	222.463	17.4983	253.266
YPK_1810	NC_010465	2010175..2010363	0	0	0	123.953
YPK_1811	NC_010465	complement(2010268..2011143)	175.002	269.076	55.4314	169.374
YPK_1812	NC_010465	complement(2011447..2012340)	218.246	134.968	119.494	227.109
YPK_1813	NC_010465	complement(2012337..2013221)	220.465	117.316	43.8942	110.297
YPK_1814	NC_010465	complement(2013221..2014111)	328.471	431.461	468.685	341.81
YPK_1815	NC_010465	complement(2014108..2015076)	323.604	373.564	140.312	435.179
YPK_1816	NC_010465	2015288..2015950	21.0204	84.6478	87.8876	106.005
YPK_1817	NC_010465	complement(2016072..2016755)	122.251	246.147	667.316	234.043
YPK_1818	NC_010465	2017074..2017325	55.3038	256.11	0	154.941
YPK_RS09135	NC_010465	complement(2017397..2017774)	294.954	163.316	51.384	382.189
YPK_1819	NC_010465	complement(2018084..2018296)	327.149	52.6962	0	439.946
YPK_1820	NC_010465	2018687..2020615	252.867	453.859	302.071	287.425
YPK_1821	NC_010465	2020820..2021170	615.432	1351.07	774.713	912.168
YPK_1822	NC_010465	2021267..2021464	281.547	481.851	637.629	295.797
YPK_1823	NC_010465	2021502..2021858	644.127	613.092	870.506	874.963
YPK_1824	NC_010465	2022357..2023340	155.795	342.204	286.215	376.961
YPK_1825	NC_010465	2023354..2025741	233.443	286.718	231.809	210.923
YPK_1826	NC_010465	2025746..2026042	305.009	434.611	163.495	525.862
YPK_1827	NC_010465	2026376..2026834	500.987	195.63	84.6325	340.264
YPK_1828	NC_010465	2027061..2028068	407.866	161.461	395.015	247.906
YPK_1829	NC_010465	2028138..2028692	276.22	136.512	157.485	323.618
YPK_1830	NC_010465	2028717..2029475	238.703	99.8208	127.952	51.443
YPK_1831	NC_010465	2029825..2030979	235.293	80.1735	168.166	118.319
YPK_1832	NC_010465	2030966..2031949	169.958	111.216	108.564	115.072
YPK_1833	NC_010465	2031946..2033949	337.287	172.229	101.768	249.391
YPK_1834	NC_010465	2033946..2034851	230.738	80.5275	75.0343	155.147
YPK_1835	NC_010465	2034848..2036512	121.369	155.05	431.626	138.359
YPK_1836	NC_010465	2036509..2036853	60.5937	113.87	0	316.889
YPK_1837	NC_010465	2036850..2037236	450.147	145.017	326.229	282.498
YPK_1838	NC_010465	2037516..2037980	269.74	108.622	0	218.317
YPK_1839	NC_010465	2038105..2039121	82.2216	60.7017	76.394	176.606
YPK_1840	NC_010465	2039173..2040636	295.105	116.92	238.809	112.015
YPK_1841	NC_010465	complement(2040805..2041851)	159.731	123.285	241.166	123.065
YPK_1842	NC_010465	complement(2042008..2042829)	50.8633	71.688	94.5166	161.501
YPK_1843	NC_010465	2043204..2045588	262.954	117.655	199.525	173.534
YPK_1844	NC_010465	complement(2046188..2047291)	138.861	188.088	211.121	141.468
YPK_1845	NC_010465	2047912..2050968	145.885	106.478	149.311	112.397
YPK_1846	NC_010465	2051106..2051522	367.631	134.584	186.313	187.267
YPK_RS09280	NC_010465	2051781..2051939	0	35.2965	0	0
YPK_1847	NC_010465	2052117..2052488	74.9277	196.123	182.745	10.496
YPK_1848	NC_010465	2052503..2054014	152.085	168.884	166.998	136.865
YPK_1849	NC_010465	2054199..2054945	195.895	195.336	260.016	324.07
YPK_1850	NC_010465	2054920..2056245	204.949	97.3449	36.6198	147.229
YPK_1851	NC_010465	2056242..2057462	131.262	197.643	222.706	271.814
YPK_1852	NC_010465	2057551..2057973	642.465	119.407	0	36.9222
YPK_1853	NC_010465	2058244..2059308	157.032	97.488	145.902	164.98
YPK_1854	NC_010465	complement(2059668..2059904)	147.01	1326.08	245.863	675.466
YPK_1855	NC_010465	complement(2060225..2061637)	103.563	540.164	281.794	223.826
YPK_1856	NC_010465	complement(2062894..2064267)	167.36	87.8174	176.703	82.4099
YPK_1857	NC_010465	2064516..2065172	371.217	196.468	192.162	273.376
YPK_1858	NC_010465	complement(2065223..2066374)	84.6839	299.607	311.917	267.758
YPK_1859	NC_010465	complement(2066854..2068056)	115.848	104.965	435.931	197.985
YPK_1860	NC_010465	2068346..2069278	14.9374	81.2047	145.726	154.842
YPK_1861	NC_010465	complement(2069220..2069381)	0	34.6429	0	0
YPK_1862	NC_010465	complement(2069381..2070406)	135.834	114.868	208.241	106.556
YPK_1863	NC_010465	complement(2070933..2071511)	505.471	382.867	369.007	397.87
YPK_1864	NC_010465	complement(2071887..2072738)	318.971	309.59	113.986	444.529
YPK_1865	NC_010465	2072857..2073078	0	126.4	437.459	105.528
YPK_1866	NC_010465	2073178..2073528	238.232	271.813	110.673	189.108
YPK_1867	NC_010465	2073731..2073892	0	242.5	119.896	192.816
YPK_1868	NC_010465	complement(2073837..2074517)	255.811	218.387	313.737	126.137
YPK_1869	NC_010465	complement(2074596..2075003)	68.3165	254.472	47.6058	392.366
YPK_1870	NC_010465	2075276..2076280	214.942	92.1397	19.3265	186.485
YPK_1871	NC_010465	complement(2076501..2077598)	152.312	194.227	17.6896	280.927
YPK_1872	NC_010465	complement(2077686..2078285)	139.366	229.163	307.533	130.151
YPK_1873	NC_010465	complement(2078508..2080145)	250.994	125.057	148.223	231.22
YPK_RS09425	NC_010465	2080319..2080558	348.414	93.5358	80.9299	195.226
YPK_1875	NC_010465	2080690..2081586	194.211	112.618	86.6139	213.291
YPK_1876	NC_010465	2082384..2082815	661.341	272.813	292.247	370.568
YPK_1877	NC_010465	complement(2082959..2083426)	387.127	353.757	622.537	358.749
YPK_1878	NC_010465	2083982..2085094	187.824	151.271	226.865	59.6378
YPK_1879	NC_010465	2085152..2085466	66.3646	124.714	61.6608	123.953
YPK_1880	NC_010465	2085488..2086210	96.3801	124.197	161.188	97.2081
YPK_1881	NC_010465	2086392..2087666	191.286	160.661	205.657	168.43
YPK_1882	NC_010465	2087821..2088681	153.772	130.363	45.1177	136.046
YPK_1883	NC_010465	complement(2088741..2089346)	114.988	555.658	224.36	418.802
YPK_1884	NC_010465	complement(2089591..2089854)	316.74	255.098	294.29	177.478
YPK_1885	NC_010465	complement(2090100..2090690)	165.069	199.416	98.5948	356.759
YPK_1886	NC_010465	complement(2090946..2092481)	254.052	191.821	75.8717	279.621
YPK_1887	NC_010465	complement(2093095..2094375)	157.752	155.528	454.875	274.323
YPK_1888	NC_010465	complement(2094766..2095581)	145.172	116.92	261.832	181.828
YPK_1889	NC_010465	complement(2095581..2096573)	147.365	226.068	215.161	117.961
YPK_1890	NC_010465	complement(2096573..2097463)	86.0281	100.779	337.889	227.873
YPK_1891	NC_010465	complement(2097450..2098415)	129.844	55.1919	583.097	169.762
YPK_1892	NC_010465	complement(2098412..2100055)	220.408	139.962	230.384	225.626
YPK_RS09520	NC_010465	complement(2100191..2100376)	149.855	226.296	208.851	335.873
YPK_1893	NC_010465	complement(2100613..2101641)	223.472	125.442	103.817	170.752
YPK_1894	NC_010465	2101886..2102551	146.48	387.626	408.295	322.446
YPK_1895	NC_010465	2102713..2102940	0	110.766	0	34.2502
YPK_1896	NC_010465	2102940..2103299	38.7127	85.7411	0	21.6918
YPK_1897	NC_010465	2103384..2103626	57.3521	161.667	0	208.884
YPK_1898	NC_010465	2103607..2105004	174.456	190.685	229.243	259.743
YPK_1899	NC_010465	2105001..2106062	164.037	129.47	155.458	136.033
YPK_1900	NC_010465	complement(2106072..2106530)	242.903	140.609	190.423	170.132
YPK_1901	NC_010465	complement(2106592..2107038)	31.178	200.882	43.4523	331.928
YPK_1902	NC_010465	2107375..2108952	304.697	131.59	190.785	143.512
YPK_1903	NC_010465	complement(2109133..2109636)	359.475	83.5141	77.0761	69.7236
YPK_1904	NC_010465	2109799..2110773	85.7634	94.9748	129.488	40.0464
YPK_1905	NC_010465	complement(2110815..2111585)	244.025	123.744	0	182.312
YPK_1906	NC_010465	2111963..2113579	280.11	244.685	234.231	241.467
YPK_1907	NC_010465	2113792..2114805	192.418	251.827	277.747	215.634
YPK_1908	NC_010465	complement(2115179..2116018)	8.29557	83.5141	115.614	92.9649
YPK_1909	NC_010465	2116222..2116431	66.3646	26.7245	184.983	0
YPK_1910	NC_010465	complement(2116330..2117334)	159.473	245.706	222.255	299.153
YPK_1911	NC_010465	2117429..2117554	0	66.8113	0	30.9883
YPK_1912	NC_010465	complement(2117605..2118546)	192.33	107.238	247.429	153.362
YPK_1913	NC_010465	complement(2118831..2122364)	187.319	106.399	173.127	116.009
YPK_1914	NC_010465	2122843..2123175	376.664	117.973	962.409	46.9012
YPK_1915	NC_010465	complement(2123235..2123894)	358.972	106.291	382.578	550.183
YPK_1916	NC_010465	2124197..2124520	129.042	86.6072	0	72.306
YPK_1917	NC_010465	complement(2124578..2125030)	353.798	346.888	128.63	249.958
YPK_1918	NC_010465	complement(2125100..2126092)	357.887	364.535	39.1202	271.311
YPK_1919	NC_010465	2126358..2129072	177.094	147.797	132.349	198.462
YPK_1920	NC_010465	2129069..2129263	71.4695	374.143	398.424	140.162
YPK_1921	NC_010465	2129273..2129644	374.639	362.074	52.2128	31.4881
YPK_1922	NC_010465	complement(2129830..2131221)	60.0714	84.666	118.604	61.7094
YPK_1923	NC_010465	2131431..2132387	131.065	67.4396	60.8877	89.7592
YPK_1924	NC_010465	complement(2132508..2133113)	114.988	282.46	176.283	135.305
YPK_1925	NC_010465	2133536..2137423	229.408	118.363	199.827	211.897
YPK_1926	NC_010465	2137762..2138091	295.624	323.124	235.432	496.939
YPK_1927	NC_010465	2138088..2138411	0	51.9643	0	24.102
YPK_1928	NC_010465	complement(2138467..2139303)	133.205	60.3457	69.6171	195.926
YPK_1929	NC_010465	complement(2139637..2139927)	191.568	260.357	300.358	80.5057
YPK_1930	NC_010465	2140546..2141100	401.775	131.456	349.967	239.196
YPK_1931	NC_010465	2141126..2141704	216.63	77.5426	234.822	121.384
YPK_1932	NC_010465	complement(2141692..2141814)	0	22.8136	0	0
YPK_RS09715	NC_010465	2142269..2142427	0	35.2965	0	147.341
YPK_RS09720	NC_010465	complement(2142531..2142887)	78.076	110.042	108.813	153.119
YPK_1935	NC_010465	complement(2146338..2147837)	292.668	151.528	349.617	166.593
YPK_1936	NC_010465	complement(2147915..2149219)	181.549	101.062	349.766	221.406
YPK_1937	NC_010465	complement(2149219..2149965)	65.2985	82.642	130.008	198.624
YPK_1938	NC_010465	2150262..2150678	116.974	33.646	186.313	159.177
YPK_1939	NC_010465	complement(2150702..2152093)	135.161	143.126	306.975	339.402
YPK_1940	NC_010465	complement(2152363..2153316)	343.301	164.717	427.554	114.598
YPK_RS09760	NC_010465	2153522..2153725	0	0	761.693	38.2796
YPK_1941	NC_010465	2153846..2155372	182.535	266.457	133.558	212.23
YPK_1942	NC_010465	2155462..2156856	299.711	398.281	111.387	184.73
YPK_1943	NC_010465	complement(2156947..2157903)	305.818	240.437	345.03	228.478
YPK_1944	NC_010465	complement(2158038..2158790)	749.576	223.591	322.43	207.412
YPK_1945	NC_010465	complement(2158863..2159381)	456.496	221.674	261.969	270.834
YPK_1946	NC_010465	2159622..2161067	125.294	188.236	315.66	259.222
YPK_1947	NC_010465	2161677..2164010	244.815	150.282	220.529	187.364
YPK_1948	NC_010465	2164156..2164830	206.468	166.286	86.3252	92.5517
YPK_1949	NC_010465	complement(2164897..2165244)	240.285	96.7611	139.534	112.199
YPK_1950	NC_010465	complement(2165246..2166913)	91.9078	117.761	442.494	60.8619
YPK_1951	NC_010465	2167466..2168260	184.068	74.1227	171.022	58.9362
YPK_1952	NC_010465	complement(2168429..2170468)	153.712	115.544	180.902	202.882
YPK_1953	NC_010465	complement(2170425..2171576)	60.4885	65.7673	278.196	101.68
YPK_1954	NC_010465	complement(2171581..2173134)	71.7455	189.6	206.231	183.417
YPK_1955	NC_010465	2173340..2174830	257.046	137.387	247.512	133.555
YPK_1956	NC_010465	complement(2175255..2176073)	255.248	102.787	438.741	219.302
YPK_1957	NC_010465	complement(2176083..2176904)	237.362	160.445	59.0729	285.002
YPK_1958	NC_010465	complement(2176908..2177939)	155.301	103.324	188.209	204.306
YPK_1959	NC_010465	2178526..2178675	278.731	0	517.951	0
YPK_1960	NC_010465	2178694..2179347	95.8937	94.3939	207.893	173.136
YPK_1961	NC_010465	2179344..2180882	167.528	80.2256	100.965	149.686
YPK_1962	NC_010465	2180909..2181970	282.143	219.307	548.677	264.713
YPK_1963	NC_010465	2182149..2183099	227.147	115.076	194.027	180.651
YPK_1964	NC_010465	2183243..2183713	29.5893	142.985	371.143	41.4493
YPK_1965	NC_010465	2183777..2184793	123.332	176.587	477.462	122.856
YPK_1966	NC_010465	complement(2184750..2184866)	0	0	83.005	0
YPK_1967	NC_010465	2184938..2186392	249.038	98.3572	293.684	104.657
YPK_1968	NC_010465	2186379..2187557	159.579	119.002	247.114	351.043
YPK_1969	NC_010465	2187706..2187798	0	0	0	0
YPK_1970	NC_010465	complement(2188111..2188371)	0	21.5025	669.764	164.558
YPK_1971	NC_010465	2188576..2189448	239.46	189.643	100.119	152.066
YPK_1972	NC_010465	complement(2189645..2190583)	200.366	328.72	548.151	307.705
YPK_1973	NC_010465	2191157..2192689	309.095	97.0136	221.726	188.477
YPK_1974	NC_010465	complement(2192970..2194490)	123.697	88.5546	121.315	66.744
YPK_1975	NC_010465	2194759..2196603	253.049	109.505	252.659	124.86
YPK_1976	NC_010465	2196717..2197466	18.5821	220.744	297.822	72.8844
YPK_1977	NC_010465	2197693..2198067	185.821	134.692	103.59	124.945
YPK_1978	NC_010465	2198281..2198526	339.916	205.322	78.956	15.872
[truncated: 2,373 more rows]
