# Supplementary material for: 6S RNA facilitates bacterial virulence and adaptation at the epithelial barrier
Source: Research Square preprint supplement (doi:10.21203/rs.3.rs-7847320/v1), 2025-11-19
Supplement: Supplementary file 6 [file c3322305e080cad67bd3f84a.xlsx]

## Sheet: Sheet1
Supplementary Table S5. RNAscope probes used of Y. pseudtuberculosis YPIII
Target	Catalog #	Accession Number	Target Region	Strand	Number of pairs	Target Sequence
B-Yersinia-23S rRNA	509841	NR_122027.1	1489 - 1530	positive strand	1	ggagtgaccaggtaaatccggttgcttatcaaccctgaggcg (7 matches)
B-Y.pseudotubeculosis-lcrH	833811	M57893.1	1546 - 2052	positive strand	10	tgcaacaagagacgacagacactcaagaataccagctggcaatggaatccttcctaaaaggagggggaactatcgccatgctcaacgaaatttcaagtgacactttagagcaactctactctcttgcatttaaccaataccagtcaggaaaatacgaggatgctcacaaggtctttcaagctctctgtgtgctagaccactatgattcacgtttctttttagggctaggcgcttgtcgtcaagccatggggcaatacgacttagcgattcatagctacagctatggcgccataatggatataaaagaacctcgttttccgtttcatgcggccgaatgtttactgcaaaagggagagcttgctgaagcagaaagtggcttgttcttggctcaagagctta…
B-Y.pseudotubeculosis-pYV0026 (parE)	1116761	NC_006153.2	c 21282-21581	negative strand	1	ggatatttataatattgccagttatactatccggcatttcggtgtgactcaggctaagttataccatgagaacttggcaaaggtattcgagctattagctaaa
B-Y.pseudotuberculosis-fis	1215571	NC_010465.1	c 492765 - 493061	negative strand	6	tgttcgaacaacgcgtaaattctgacgtactgaccgttgcaaccgtaaactcacaagatcaggtgactcaaaagcctttgcgtgactcggttaaacaagcactgaagaactattttgctcaactgaatggtcaagatgtaagtgacctgtatgagttggtactggctgaagttgaacagccattgttggacatggtgatgcaatacacccgtggcaaccaaacccgtgcggccctgatgatgggcatcaaccgcggtacgctgcgtaagaaattgaaaaaatacgg
B-Y.pseudotuberculosis-ssrS	1244091	NC_010465.1	c 984502 - 984684	negative strand	4	tttctctgaggtgtttgccagcgggccagtcccctgagccgatatttaataccaacagaatgtagtgctccgtaaccggtgagcatgctcggtccgccgagaagccttaaggttgcgacgctgcgttcaccttgaaccaagggttcaagggttacagcctgcgacggcacctcggagatcc
